# Supplementary material for: EED orchestration of heart maturation through interaction with HDACs is H3K27me3-independent
Source: eLife journal article supplement (doi:10.7554/elife.24570), 2017-04-10
Supplement: supp [file elife-24570-supp-v1.zip]

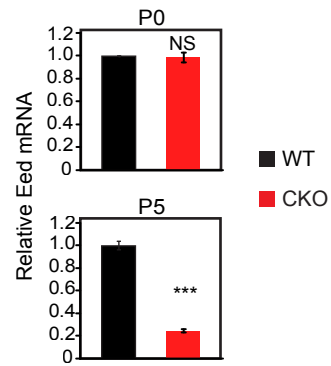

**Figure 1 -- figure supplement 1. *Eed* depletion in WT and *Eed*<sup>CKO</sup> mice.**

Heart apices were harvested for qRT-qPCR for relative *Eed* mRNA expression on postnatal day 0 (P0) and 5 (P5).

Heart apex contains both cardiomyocytes and non-cardiomyocytes. The non-myocytes likely account for the detected level of *Eed* mRNA in EED-CKO. *P*-value by Student's *t*-test. \*\*\*, *P* < 0.001. NS, not significant.
