# Supplementary material for: EED orchestration of heart maturation through interaction with HDACs is H3K27me3-independent
Source: eLife journal article supplement (doi:10.7554/elife.24570), 2017-04-10
Supplement: supp [file elife-24570-supp-v1.zip]

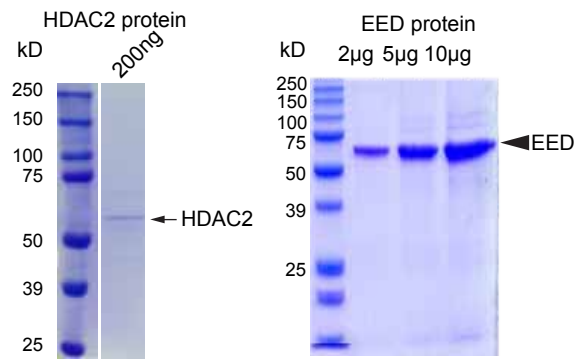

Provided by Cayman Chemical

**Figure 4 -- figure supplement 2. Validation of HDAC2 and EED proteins purity and dCas9-EED interaction with EZH2.**

Coomassie brilliant blue staining of recombinant purified HDAC2 and EED proteins. The lot # specific staining gel image was provided by the manufacturer, Cayman Chemical.
