# Supplementary material for: EED orchestration of heart maturation through interaction with HDACs is H3K27me3-independent
Source: eLife journal article supplement (doi:10.7554/elife.24570), 2017-04-10
Supplement: supp [file elife-24570-supp-v1.zip]

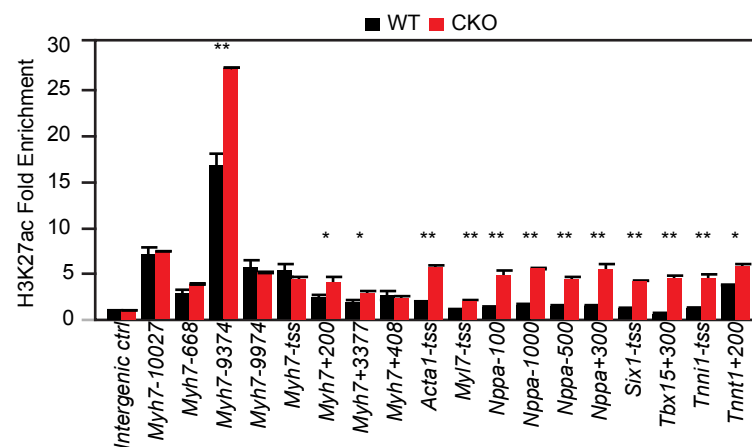

**Figure 2 -- figure supplement 1. H3K27ac ChIP-qPCR validation.** H3K27ac enrichment was measured by ChIP-qPCR on target genes using adult cardiomyocytes isolated from WT and EED<sup>CKO</sup> hearts. \*,  $P < 0.05$ ; \*\*,  $P < 0.01$ ; \*\*\*,  $P < 0.001$  by Welch's  $t$ -test.
