# Supplementary material for: EED orchestration of heart maturation through interaction with HDACs is H3K27me3-independent
Source: eLife journal article supplement (doi:10.7554/elife.24570), 2017-04-10
Supplement: supp [file elife-24570-supp-v1.zip]

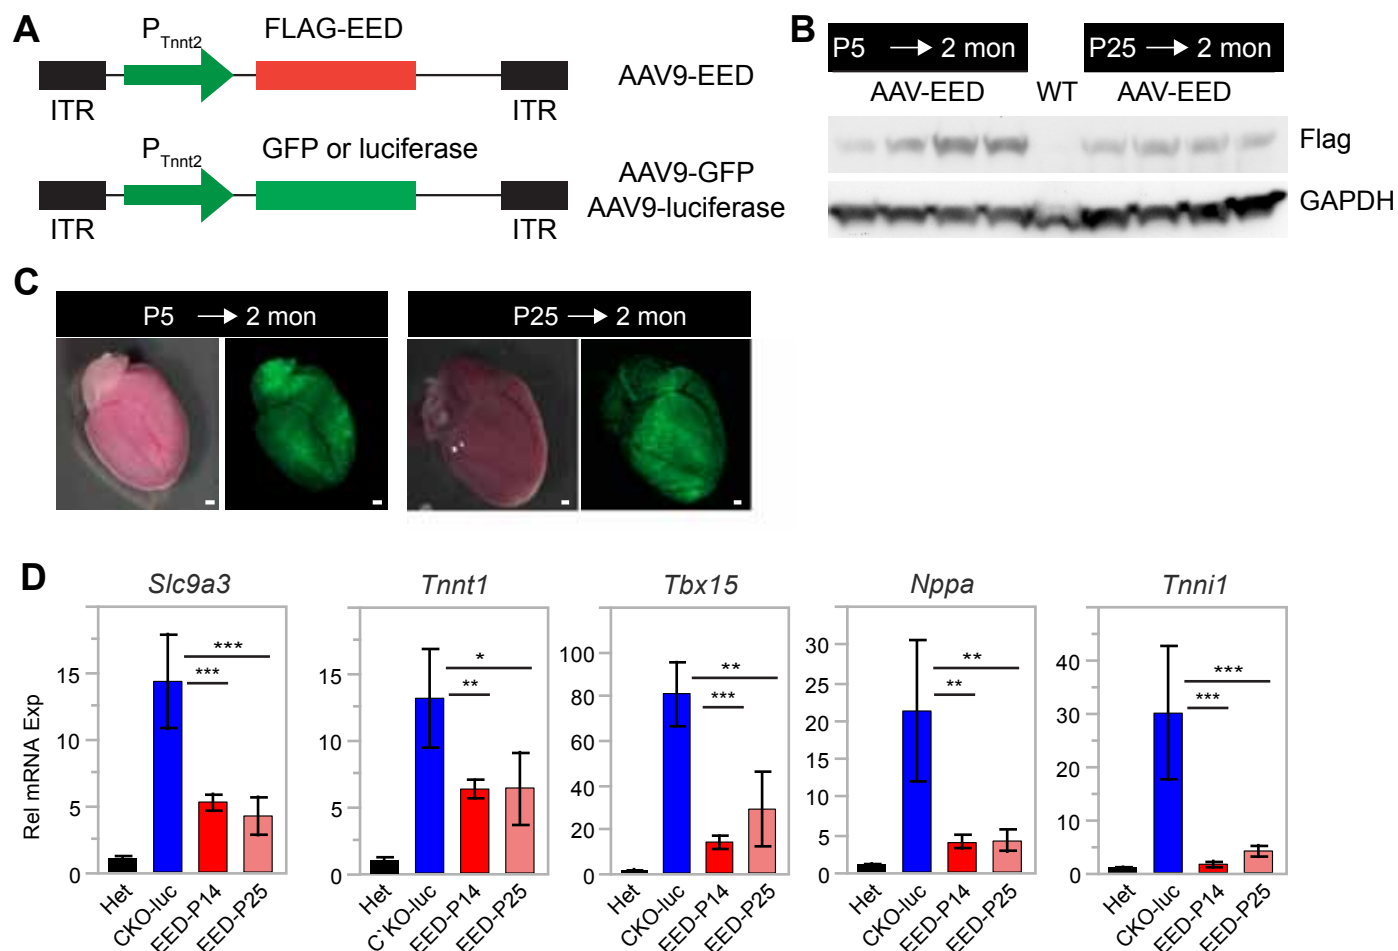

**Figure 3 -- figure supplement 1. AAV9-EED rescue of EED<sup>CKO</sup> mice.**

- Schematic of AAV9 constructs expressing Flag-tagged EED (Flag-EED), GFP or luciferase. ITR, Inverted Terminal Repeat. P<sub>Tnnt2</sub>, cardiac specific troponin T promoter.
- AAV9-EED expression of Flag-EED. Mice were treated with AAV9-EED at P5 or P25. Heart extracts were prepared at 2 months of age. WT, untreated wild-type mice.
- Brightfield and GFP fluorescent signals in hearts of mice injected with AAV9-GFP at P5 or P25 and harvested at 2 months of age. Bar = 500  $\mu$ m.
- qRTPCR was performed to validate the expression of the indicated genes in cardiomyocytes from 2 month-old mice treated with AAV9-luc or AAV9-EED at P14 and P25.
