# Supplementary material for: EED orchestration of heart maturation through interaction with HDACs is H3K27me3-independent
Source: eLife. 2017 Apr 10;6:e24570. doi: 10.7554/eLife.24570 (PMC5400508; doi:10.7554/eLife.24570)
Supplement: Supplementary file 1. — DOI: http://dx.doi.org/10.7554/eLife.24570.016 [file elife-24570-supp1.xlsx]

## Sheet: shared H3k27me3 peaks
##5009 shared H3k27me3 peaks
chr	start	end
chr17	25851975	25856328
chr12	109236024	109239507
chr1	137144220	137155635
chr3	28979773	28986499
chr5	135605983	135611370
chr2	31485618	31516050
chr2	31665619	31689451
chr17	57285503	57294095
chr17	57360184	57367715
chr19	37504423	37506711
chr19	37511226	37512061
chr6	87321105	87334573
chr2	31705704	31719501
chr2	32170255	32177743
chr4	118411617	118415006
chr8	72403144	72414955
chr11	100608167	100612090
chr14	24819102	24827213
chr1	192800660	192805337
chr8	72632342	72639583
chr8	10932238	10940957
chr11	59383026	59390526
chr8	125259386	125260814
chr2	121630944	121635622
chr1	174321104	174323358
chr1	38954059	38957588
chr1	173228341	173229908
chr3	107962743	107963277
chr3	108019150	108022227
chr9	43722601	43727398
chr9	43736925	43744296
chr8	87072623	87074141
chr14	119252566	119254971
chrX	152056820	152062001
chr6	112437214	112441088
chr5	99281238	99287183
chr10	117005919	117010461
chr2	80285655	80288490
chr2	81892903	81895072
chr3	87374105	87375571
chr2	122129124	122141222
chr7	31224845	31231727
chr4	133780620	133781202
chr4	133897543	133900742
chr7	108578139	108581852
chr17	26337904	26342407
chr2	12222173	12224084
chr7	142601174	142605246
chr2	12930662	12934840
chr7	31237523	31254024
chr7	31258095	31265211
chr16	11981265	11989393
chr19	43501660	43503854
chr15	66115955	66119771
chr5	28508617	28528683
chr16	89958157	89963235
chr9	64969265	64972507
chr9	65003612	65014559
chr6	81768058	81769244
chr1	173336476	173339371
chr8	113912206	113919326
chr12	17181067	17184488
chr2	32206376	32209084
chr4	134508127	134509663
chr8	114413136	114416563
chr15	100769432	100771441
chr1	120945154	120952471
chr2	13714292	13716346
chr2	13718960	13719779
chr15	99525764	99526774
chr15	100253779	100258266
chr12	68160335	68160601
chrX	155851568	155856139
chr7	108562808	108577709
chr7	86985781	86991224
chr7	86991867	86994960
chr5	115303934	115313781
chr17	47531096	47534930
chr15	100552020	100561870
chr17	25951669	25959151
chr5	100040842	100045979
chr2	180258561	180270056
chr17	47535587	47538222
chr5	67593505	67599386
chr17	47540188	47542838
chr4	115582287	115586381
chr8	123560268	123561037
chr6	124722788	124723627
chr8	123571282	123572440
chr9	99762808	99783134
chr17	47544029	47548183
chr5	115639271	115644977
chr5	67630043	67634520
chr7	88638435	88645134
chr17	47572162	47576542
chr5	28442839	28463039
chr7	88659484	88662545
chr19	60219736	60221664
chr2	164779710	164785872
chr7	89135981	89142053
chr12	70712088	70712753
chr12	71445824	71448966
chr5	28467642	28482276
chr5	28483081	28506203
chr7	53012066	53018685
chr16	89765372	89770511
chr11	83563594	83563925
chr17	48231070	48238418
chr2	180506647	180516785
chr5	116110654	116114099
chr5	72977065	72981414
chr15	38907903	38908945
chr15	39028140	39031231
chr7	3424224	3426879
chr2	151454719	151460062
chr8	46154266	46154731
chr9	56488375	56498329
chr12	109938028	109943548
chr2	180530206	180540826
chr11	109182710	109183400
chr13	25144606	25149522
chr2	180617997	180636197
chr12	72408594	72413869
chr15	100651826	100656836
chr15	75392252	75398967
chr7	53111994	53118011
chr12	110269540	110285894
chr12	110287417	110312096
chr2	164912796	164946122
chr2	164956158	164963396
chr14	104047851	104052363
chr13	30838899	30845518
chr14	104438336	104440550
chr13	34803818	34804412
chr16	90162210	90166137
chr11	109700528	109700870
chr11	109731992	109734220
chr11	109738408	109739861
chr6	118135831	118158616
chr13	35130049	35131097
chr5	28783887	28801745
chr1	133037487	133037896
chr2	151664840	151675406
chr17	27458398	27466998
chr11	83621569	83623515
chr15	39688403	39689625
chr1	133139642	133142246
chr1	133145871	133147715
chr16	90382917	90389218
chr8	119993491	119996223
chr4	116511797	116514040
chr1	133493322	133497414
chr11	66894587	66899060
chr19	61275515	61275831
chr1	133802382	133805882
chr1	133849591	133853671
chr8	121968826	121974860
chr11	110402785	110403415
chr19	45273027	45273992
chr4	110023056	110025042
chr5	120180993	120184251
chr19	45151144	45153825
chr19	45156968	45162215
chr19	45171077	45172954
chr19	45180973	45181643
chr6	84394153	84395839
chr6	84410825	84413989
chr9	63670443	63674599
chr5	120196932	120202993
chr5	106857823	106863925
chr5	120135187	120145290
chr5	120187951	120195102
chr5	120242476	120260407
chr5	106872031	106908011
chr5	137352046	137365708
chr9	106016202	106021665
chr11	77462906	77463941
chr5	120339445	120341350
chr11	77710608	77714605
chr11	77718908	77724247
chr11	77725781	77731578
chr11	96974039	96981742
chr19	45290690	45292947
chr5	137495799	137497489
chr11	87585075	87600170
chr15	102880444	102882587
chr3	96164793	96167004
chr5	106985668	106990863
chr8	123864754	123867000
chr8	24080520	24090449
chr13	54578794	54583533
chr14	64215998	64219807
chr14	64220537	64222114
chr14	64224726	64226638
chr2	172327762	172332882
chr2	172335613	172345999
chr5	107253560	107256962
chr9	106500579	106503006
chr6	38592338	38593624
chr12	85408995	85411457
chr2	172369573	172383075
chr2	172383920	172391338
chr11	53276473	53278440
chr11	53290905	53294274
chr3	130318346	130321571
chr5	137929308	137931357
chr7	149443031	149444556
chr3	90503561	90504847
chr6	117742926	117744174
chr15	102904353	102907298
chr15	102911040	102922227
chr2	101488207	101488835
chr17	32529445	32537024
chr19	45343668	45347662
chr3	96258550	96260030
chr3	96275907	96282510
chr13	96731015	96735618
chr4	125573664	125596897
chr12	85963680	85967797
chr8	26549817	26552067
chr5	138015180	138016633
chr8	12443716	12449360
chr5	138023048	138026187
chr8	12451501	12453684
chr2	26990113	26990944
chr2	26996580	26998415
chr13	48384493	48387099
chr2	151689931	151702887
chr7	31416138	31421772
chr7	31499918	31505737
chr1	137945425	137949841
chr4	134656281	134663138
chr5	38683516	38694319
chr9	44889152	44891697
chr4	98393121	98395699
chr8	125874192	125885015
chr2	33561184	33564647
chr9	66559503	66563604
chr8	87435616	87438569
chr8	87439343	87442598
chr6	87929702	87933915
chr4	120032077	120038682
chr8	12884361	12886737
chr19	43619230	43621753
chr14	119497438	119499482
chr11	95470772	95473723
chr2	33882045	33894236
chrX	11801497	11805109
chr7	31657485	31660985
chr11	100500588	100502657
chr11	100508970	100513430
chr11	71714621	71718037
chr18	76538988	76542901
chr5	144145668	144151080
chr3	108338961	108340584
chr4	20118892	20119205
chr4	20704343	20707116
chr14	56329844	56333317
chr12	17328908	17332819
chr12	17333102	17334024
chr8	12373882	12411503
chr8	12476768	12481018
chr3	157228511	157232856
chr8	72687627	72690973
chr8	87464307	87471587
chr5	150241464	150247610
chr2	32707380	32708557
chr5	147741459	147744704
chr18	78239406	78253248
chr15	78744464	78745890
chr8	73411408	73418198
chr19	43642253	43643955
chr15	78500775	78506100
chr11	100939402	100941433
chr14	56495856	56498139
chr9	100286267	100291229
chr11	95851733	95856402
chr12	110686525	110697019
chr2	151894437	151897572
chr3	108742550	108744435
chr6	55334384	55349535
chr12	110697273	110701235
chr15	78552690	78555144
chr7	146374515	146376075
chr7	146763191	146776413
chr8	74209172	74218899
chr19	38196691	38201499
chr6	113141366	113148932
chr12	74128168	74128406
chr15	100812549	100817158
chr12	74628501	74630052
chr12	17447617	17449574
chr12	17459928	17462055
chr15	100832001	100836523
chr15	100837106	100840040
chr15	79031912	79034951
chr2	17650894	17653793
chr15	79081771	79083452
chr3	87748876	87759443
chr17	85852586	85856314
chr3	87808826	87810661
chr1	120998069	120998962
chr7	4641509	4643664
chr9	30748080	30752660
chr12	74640906	74641818
chr12	74684411	74687534
chr12	73170698	73172360
chr15	100690224	100693523
chr13	48747083	48779008
chrX	133646627	133650745
chr6	118322165	118326959
chr15	100745134	100749130
chr12	73507921	73511125
chr1	75273223	75276680
chr9	42327382	42332399
chr2	29414227	29415021
chr12	73964481	73965115
chr12	74018166	74019265
chr12	74030023	74031302
chr2	3255041	3255443
chrX	100641178	100643885
chr11	32200300	32203176
chr15	83788241	83796127
chr15	83797770	83805155
chr15	83805690	83810411
chr4	147532145	147536825
chr7	25648104	25655648
chr19	25560371	25562110
chr1	134078798	134081154
chr1	134091720	134094762
chr19	25578075	25581776
chr1	78135184	78142491
chr4	129726410	129729022
chr1	138116003	138132348
chr1	138152712	138160499
chr4	147537421	147541458
chr7	25712484	25742684
chr8	122156357	122158804
chr4	134719037	134733351
chr1	78176043	78179892
chr6	126688077	126695096
chr8	125931052	125938393
chr2	29605840	29609048
chr6	25637815	25640746
chr8	122221532	122227375
chr2	33479832	33506495
chr4	134951564	134955804
chr1	134116900	134119739
chr1	134129691	134130608
chr6	87678096	87683826
chr2	33507987	33510510
chr11	67267714	67271198
chr6	119277469	119283556
chr11	118805143	118816480
chr11	118821103	118836153
chr7	25879710	25885500
chr15	44945538	44947877
chr8	46465760	46467918
chr4	129815658	129818649
chr9	121585736	121586291
chr6	120242336	120246545
chr15	83891657	83904360
chr11	83699049	83700011
chr8	126251729	126255131
chr8	94899837	94903392
chr4	119909352	119911029
chr7	25897056	25902100
chr6	120439753	120446931
chr4	147677077	147690271
chr19	25647816	25653259
chr1	134426727	134432379
chr4	135983610	135986855
chr2	33818311	33825934
chr4	129674494	129679896
chr7	25957491	25970808
chr11	119112048	119116016
chr11	119168977	119172253
chr2	28035443	28058902
chr12	8301636	8302875
chr19	25663400	25669036
chr4	129892322	129894306
chr11	102257709	102263046
chr11	102465056	102468773
chr4	129921053	129924394
chr15	84273888	84280169
chr11	119416645	119430074
chr11	119767233	119770650
chr4	129946929	129948543
chr11	32763947	32764889
chr12	8318694	8319008
chr12	8955109	8957149
chr1	134435805	134442987
chr19	45366384	45375944
chr19	45376745	45379344
chr3	66773434	66789767
chr3	67318366	67322432
chr13	96897941	96904298
chr13	55007025	55009532
chr6	56601431	56605560
chr8	80942051	80944849
chr4	114335120	114336220
chr4	114337872	114343840
chr13	55019745	55029718
chr9	14569299	14577902
chr6	84509482	84510698
chr9	14662753	14669472
chr4	40418557	40422136
chr5	120557953	120560705
chr17	28241976	28245786
chr6	142359113	142363510
chr17	28290010	28305469
chr17	28667889	28670710
chr7	120908664	120911003
chr10	23940556	23945040
chr4	138140890	138144899
chr6	142518491	142523462
chr14	122262544	122263893
chr1	137936250	137941949
chr2	70291166	70296572
chr2	70299355	70305487
chr2	70305838	70317122
chr4	138154901	138175754
chr5	138085022	138087960
chr11	97496982	97498426
chr19	45784357	45786053
chr8	126166363	126171338
chr1	50981002	50986073
chr1	165978430	165981018
chr10	125339613	125342386
chr13	109906216	109908814
chr15	95353653	95360447
chr2	70318567	70320358
chr5	138164013	138165476
chr8	26989520	26990148
chr5	147517829	147519893
chr6	85075021	85078053
chr15	103332976	103337900
chr15	103365848	103369344
chr16	31883075	31885090
chr3	97691777	97696683
chr3	97734490	97737982
chr15	95481582	95487722
chr7	121860201	121866286
chr8	12474852	12476257
chr8	12504333	12509903
chr19	10708749	10710603
chr14	122803141	122808179
chr14	122819757	122823589
chr19	5447146	5450791
chr3	97738974	97741540
chr2	102289886	102292416
chr3	97744655	97745680
chr4	138219095	138225607
chr12	54344860	54359224
chr10	125385967	125388322
chr18	82390287	82390848
chr1	34633830	34639162
chr4	126840066	126850585
chr18	15305120	15306011
chr2	70397114	70410901
chr18	15311968	15312888
chr3	97755379	97756012
chr3	97759568	97762536
chr6	143646540	143648095
chr4	49071288	49074069
chr1	72580983	72586056
chr4	126982987	126986563
chr13	111069443	111072379
chr14	49264822	49265345
chr3	98141428	98145281
chr16	3838737	3839901
chr11	118766334	118773060
chr8	95479748	95488084
chr6	55397179	55410926
chr4	122780123	122786846
chr4	122867943	122870939
chr11	103619443	103640327
chr11	103655795	103663868
chr11	89156157	89163971
chr11	89166723	89171912
chr14	121902513	121906768
chr6	113694825	113706668
chr6	113707771	113712068
chr19	40847268	40849357
chr15	10963922	10968344
chr11	95982676	95983456
chr6	91231819	91245883
chr11	95984005	95989125
chr11	104043922	104052081
chr4	101179615	101183410
chr19	40900233	40904192
chr4	101221258	101226308
chr19	40949080	40953474
chr10	119678498	119680444
chr10	119707744	119711195
chr3	96096061	96098340
chr6	113835173	113844911
chr19	43722948	43723668
chr11	34933408	34936438
chr10	60144853	60154739
chr14	122126837	122133797
chr11	101645297	101648807
chr9	57916868	57923473
chr9	57960953	57967393
chr7	56213935	56219974
chr2	152848160	152853745
chr7	56930621	56939962
chr16	92703573	92721727
chr11	92958455	92964748
chr11	37045898	37052017
chr4	21621810	21624709
chr4	21643648	21646776
chr5	33443421	33449080
chr5	33876092	33884380
chr11	49712503	49716945
chr11	114427646	114430287
chr15	79291175	79295132
chr17	49525959	49526436
chr7	135071761	135075732
chr3	30545906	30554198
chr1	89038269	89059340
chr6	91280838	91300806
chr4	123857871	123879531
chr6	91782900	91787397
chr2	18619341	18624245
chr2	18718198	18725720
chr8	10427766	10428517
chr5	118312685	118324089
chr11	96006053	96016931
chr11	96017497	96018981
chr11	96019771	96021232
chr11	49778333	49778746
chr11	49792479	49793320
chr15	74366380	74374023
chr7	4726204	4734075
chr3	31046762	31052169
chr7	135555520	135561965
chr3	31206405	31210648
chr2	22473389	22475461
chr5	129104432	129116874
chr11	35790679	35794517
chr10	119985927	119991323
chr5	125483219	125486355
chr15	79339955	79342551
chr1	36180579	36181488
chr11	71820790	71821260
chr7	114513355	114515457
chr11	102005849	102010550
chr10	120042489	120044713
chr1	176431327	176435122
chr11	60777830	60778313
chr11	60959858	60961615
chr11	61154861	61157778
chr2	19349583	19355459
chr2	90951981	90952363
chr2	91760996	91764401
chr2	91765027	91766550
chr2	22599089	22601412
chr4	140846017	140849357
chr4	140920479	140923207
chr15	79763377	79764424
chr6	28217254	28217781
chr6	88182860	88187342
chr6	88191063	88194141
chr2	33894986	33897954
chr11	102831709	102833064
chr5	140440457	140442846
chr8	35385365	35391207
chr5	140443562	140456235
chr8	35423689	35427059
chr4	136308475	136315153
chr8	35451310	35455604
chr11	83740689	83744025
chr11	83749500	83753464
chr4	130125208	130129561
chr7	151463671	151474607
chr15	73667469	73672329
chr9	121913691	121914860
chr18	64421941	64426977
chr19	25701677	25703503
chr11	103495348	103500307
chrX	99441436	99450935
chr1	14493196	14499256
chr14	33405010	33418174
chrX	71116899	71127781
chr1	14742843	14748347
chr14	66665074	66667431
chr4	130425668	130426420
chr18	65944185	65948894
chr4	44652440	44654479
chr14	34027250	34032557
chr18	66030079	66037404
chr15	75715761	75719927
chr19	25710390	25712009
chr1	39705422	39710508
chr18	66088215	66103308
chr18	66449254	66455436
chr10	86947291	86956381
chr14	106184430	106184681
chr11	120388837	120396197
chr4	70039069	70039388
chr5	127714976	127725054
chr4	130452098	130452421
chr5	129454894	129459776
chr11	57748000	57749201
chr4	130498379	130501243
chr15	75791745	75795031
chr15	75795455	75797064
chr8	8948425	8949126
chr11	83878746	83883477
chr11	120582565	120583902
chr11	120626052	120627601
chr14	106662248	106663177
chr15	84846606	84848825
chr4	138296560	138303961
chr16	34746050	34748746
chr14	122858006	122860002
chr7	123450322	123452499
chr15	97287150	97291680
chr15	97299313	97303044
chr8	82579172	82583206
chr8	82711807	82713438
chr8	14604601	14608224
chr19	46196935	46197810
chr7	73568817	73575388
chr16	96498144	96503196
chr4	138431689	138439046
chr5	120214169	120216687
chr4	138627605	138634245
chr5	120230667	120231357
chr6	85133866	85145468
chr11	78296424	78298282
chr18	21464434	21465341
chr8	12510656	12513297
chr5	147698236	147701060
chr4	41043934	41046049
chr4	41443935	41447868
chr4	41458561	41460281
chr1	138840547	138856035
chr8	26477772	26481395
chr7	150150003	150157747
chr7	150158292	150158719
chr6	83675721	83678381
chr13	113329771	113330883
chr13	113773176	113775207
chr6	83703836	83708965
chr19	6533067	6538944
chr13	31646506	31655410
chr7	150630420	150633751
chr4	109692048	109695932
chr5	120232252	120232941
chr18	58367871	58371418
chr11	94101954	94102739
chr11	97910621	97915879
chr2	151898333	151912351
chr6	40255784	40257154
chr19	45241748	45244380
chr11	94333011	94339792
chr11	94340686	94342493
chr19	46387160	46401561
chr19	46417525	46419605
chr6	40413898	40414703
chr5	139798823	139802381
chr8	28282761	28288966
chr8	90168524	90175340
chr14	64190638	64209369
chr4	40302645	40307560
chr1	40541969	40542692
chr11	94347236	94352980
chr2	27953286	27960626
chr5	139972120	139973123
chr14	64318058	64322859
chr19	42272644	42278824
chr5	147719248	147720754
chr19	42329352	42331803
chr13	109001210	109015326
chr16	97386189	97389303
chr5	126008002	126018528
chr11	97483182	97493562
chr6	84523935	84527259
chr5	120267255	120268588
chr5	120298599	120299219
chr5	147727534	147728998
chr5	147730206	147733819
chr17	90851806	90856088
chr17	90857071	90857865
chr16	35525511	35546535
chr8	28335498	28341325
chr5	139988052	139989460
chr7	150691900	150692775
chr10	60379003	60382179
chr17	90991641	90993476
chr5	140048037	140049000
chr10	60392800	60393664
chr10	60423019	60424006
chr1	40735972	40740765
chr5	140054183	140055009
chr13	49893217	49893796
chr10	61452261	61456444
chr11	71863833	71865043
chr9	60979497	60984795
chr12	111461519	111478950
chr16	5303778	5311953
chr12	111508374	111540440
chr2	155615214	155617655
chr5	35646040	35662197
chr12	88367067	88369551
chr2	127278548	127287829
chr2	127302348	127313089
chr11	96088134	96091015
chr11	50753653	50758441
chr3	88027788	88031014
chr3	109942697	109948690
chr2	127358941	127369890
chr8	10793015	10794288
chr8	10872600	10873904
chr8	10897877	10902378
chr4	124537364	124542231
chr4	124555977	124567441
chr10	120158973	120161507
chr4	124670057	124688772
chr14	88867137	88871573
chr7	35436514	35439787
chr14	57720541	57721352
chr14	57722066	57726889
chr11	72077381	72081347
chr4	140935777	140941366
chr5	119512833	119515308
chr4	124865080	124879451
chr11	67161258	67167542
chr17	50089539	50090077
chr12	105811928	105818007
chr2	127479138	127487491
chr2	127711312	127714909
chrX	20495522	20499152
chr3	25042423	25043559
chr5	116530737	116539148
chr15	101241809	101244839
chr2	91814934	91817086
chr1	36796734	36801783
chr6	55595028	55598909
chr11	96103796	96104829
chr8	10968875	10977221
chr8	11005723	11012196
chr10	120467878	120474865
chr4	102650544	102652732
chr15	11832945	11835319
chr1	37328723	37329657
chr3	35440677	35441997
chr5	119534280	119538811
chr9	42428188	42439818
chr12	75384668	75387956
chr3	115953393	115958188
chr8	80945639	80947169
chr8	80947815	80952921
chr6	63203895	63208300
chr3	121235055	121235593
chr2	170303300	170308029
chr3	88169187	88171242
chr1	36825308	36829758
chr8	11068657	11069306
chr8	11074129	11075130
chr8	11187437	11188909
chr8	11488768	11490810
chr3	26229904	26233583
chr12	75904808	75905548
chr7	13627734	13631593
chr11	114908250	114910147
chr11	114917757	114922195
chr11	114944782	114949568
chr14	67527965	67533872
chr8	12415735	12436312
chr2	165018489	165026110
chr2	165026755	165043930
chr2	165044645	165076598
chr2	165077182	165095047
chr18	85126451	85128697
chr18	86878308	86883349
chr4	44735297	44736337
chr8	12464592	12470340
chr8	12494298	12503732
chr2	165192269	165197694
chr13	31656227	31663729
chr4	44737075	44738884
chr3	156220583	156227198
chr5	147690102	147695834
chr5	75511291	75513158
chr13	31703883	31727086
chr14	67829992	67830930
chr8	122694222	122696262
chr15	76113791	76116229
chr7	144497918	144523970
chr13	31889283	31904005
chr2	165384892	165394052
chr18	89937089	89939476
chr5	147722782	147726867
chr14	112078269	112081526
chr15	85146659	85149134
chr4	129681682	129687732
chr1	134063082	134068140
chr1	134099618	134109430
chr15	76548229	76550623
chr18	6999995	7006903
chr14	115412047	115413313
chr14	115420116	115423456
chr2	28143226	28148258
chr12	3109890	3110178
chr14	115489982	115494121
chr15	85347360	85347876
chr15	76821208	76821903
chr4	129876364	129886195
chr14	117323773	117328680
chr2	28228963	28237321
chr2	28603537	28610617
chr8	122514394	122519712
chr15	85416221	85416750
chr11	84455543	84459791
chr5	116543429	116543873
chr1	59314852	59315416
chr5	106940825	106942005
chr11	94740187	94747121
chr11	98206616	98215086
chr11	98306721	98310472
chr5	38106511	38112759
chr5	38198460	38237556
chr9	106049190	106054863
chr13	95990937	95994035
chr13	54468165	54477086
chr11	98318378	98322068
chr11	98324311	98326177
chr11	98333321	98334442
chr15	34382059	34383859
chr19	47251984	47256877
chr7	137468862	137474504
chr2	117108618	117113095
chr17	46570009	46572480
chr2	152891515	152903627
chr17	93598379	93603387
chr18	3004793	3006469
chr10	118514922	118515423
chr3	93244438	93245957
chr5	128110059	128115165
chr18	82642775	82646208
chr10	66992038	66998866
chr11	98394422	98396026
chr5	112511557	112525401
chr2	172321029	172321441
chr5	106991440	106993405
chr1	40746483	40746769
chr10	118894290	118896323
chr15	34628365	34628843
chr11	98419187	98421015
chr11	98421772	98423506
chr11	98459437	98464102
chr5	112808313	112830997
chr2	28826944	28835680
chr11	95430465	95463091
chr5	107185093	107187493
chr5	139567781	139569429
chr5	139583482	139585735
chr5	139586930	139590960
chr18	77957923	77959533
chr3	158222306	158225628
chr4	3006732	3013515
chr19	47326180	47329595
chr5	38564687	38575750
chr3	94165823	94169687
chr3	131746852	131751083
chr18	61170258	61176556
chr3	94200813	94209003
chr3	94242477	94245750
chr14	122842766	122846209
chr19	41723369	41735121
chr19	41737004	41755020
chr14	122891927	122897635
chr19	41766949	41772693
chr19	41811624	41822030
chr4	107105199	107110337
chr4	107115847	107117793
chr3	35953702	35955139
chr3	117276943	117281293
chr11	94793180	94800247
chr10	118889498	118893752
chr10	119124363	119131677
chr5	118906656	118910372
chr5	118913434	118919399
chr5	118978393	118980535
chr14	58687377	58698924
chr2	170405200	170407821
chr2	170408880	170410563
chr5	118980990	118986074
chr11	96217333	96221314
chr10	4421016	4428088
chr11	72831330	72834318
chr3	36661140	36661593
chr1	37277907	37280633
chr6	29009622	29012390
chr1	37289605	37290799
chr18	36353398	36358607
chr1	154798884	154806717
chr16	18617727	18630529
chr8	18562195	18564841
chr18	36689305	36693695
chr13	99330781	99333430
chr9	46249151	46256959
chr12	106563879	106583834
chr14	60242668	60246117
chr13	99353394	99360509
chr17	56109315	56111471
chr17	56124662	56128681
chr8	85811443	85816851
chr5	148209302	148214245
chr8	86860876	86864271
chr5	136149579	136150906
chr4	45348847	45350026
chr5	136273416	136275336
chr3	89120580	89127427
chr17	86195327	86197416
chr17	86198145	86202062
chr5	136310074	136313502
chr4	45336891	45339403
chr19	4456224	4457962
chr19	4636416	4637842
chr15	85308248	85314912
chr15	85402505	85415213
chr15	85869299	85872323
chr11	3837748	3838590
chr11	3895039	3901077
chr7	152044030	152053961
chr3	145811885	145817971
chr13	63672589	63675667
chr1	19220807	19228044
chr18	66627570	66632545
chr1	22539922	22544156
chr8	4212093	4219604
chr8	4226137	4228871
chr7	151921238	151925557
chr9	122471576	122474521
chr9	112020699	112022788
chr9	122475101	122485083
chr10	25795108	25799075
chr10	28863186	28868753
chr10	36225927	36229918
chr7	151975408	151976079
chr7	91233291	91237427
chr9	91244673	91253091
chr2	165417982	165430662
chr7	97450762	97454090
chr9	95303654	95310212
chr16	37914953	37917343
chr7	152020309	152030915
chr7	138734551	138745334
chr7	125734088	125738885
chr5	107260880	107263554
chr14	49730738	49731420
chr5	151752363	151758823
chr9	30935539	30944107
chr9	49147341	49149930
chr19	12573654	12576677
chr19	12670023	12671794
chr4	57001518	57004743
chr5	118822540	118824674
chr5	118826716	118827860
chr5	118830921	118834604
chr14	30533521	30537863
chr14	30539151	30544620
chr18	61217988	61219142
chr3	132610275	132614121
chr2	172367791	172368966
chr17	32294868	32297584
chr17	32298286	32305545
chr19	12714426	12714900
chr4	57162850	57163484
chr11	47799496	47804456
chr10	119563524	119565656
chr5	107831439	107834793
chr4	57423860	57425745
chr5	118845077	118848174
chr10	59568474	59573534
chr5	118884781	118888008
chr4	154657694	154661834
chr13	54831964	54835485
chr4	154766733	154775514
chr5	118910558	118911933
chr12	113346959	113362119
chr14	75787752	75788275
chr18	61851107	61852746
chr14	75855495	75860501
chr11	95993516	95998219
chr11	95999233	96001692
chr11	50660734	50669271
chr11	50763130	50773371
chr7	137404255	137409264
chr13	51660180	51667699
chr17	69163233	69166079
chr17	69184935	69187327
chr13	78332091	78353418
chr13	83850210	83874641
chr1	188615703	188616092
chr17	27791443	27793616
chr1	157563042	157572805
chr4	153315804	153327893
chr4	136380068	136400351
chr1	157574753	157591575
chr2	132204451	132213183
chr17	27841110	27846429
chr4	153449176	153482273
chr4	136680126	136691935
chr12	107409480	107427769
chr19	4680529	4683064
chr8	86883713	86888458
chr19	43512542	43519417
chr8	87451054	87462748
chr8	87530663	87533751
chr17	69188223	69191660
chr19	4690459	4691564
chr19	4692720	4694575
chr6	29475132	29479298
chr6	29565610	29569339
chr1	189427869	189436342
chr13	100673161	100676091
chr4	21601194	21620649
chr14	56980631	56987505
chr3	37582707	37585001
chr18	40467726	40468030
chr5	136341276	136342781
chr17	27972800	27974513
chr5	136343396	136346210
chr8	19923963	19926011
chr10	108446956	108449152
chr10	43691074	43691710
chr11	96239917	96245480
chr11	51292773	51303184
chr17	28216831	28218041
chr10	109890815	109893711
chr19	4711062	4716178
chr9	62522902	62527829
chr13	81769439	81773740
chr10	43735956	43737348
chr6	29640825	29645163
chr18	42551257	42563967
chr10	110973003	110973407
chr11	5068277	5070510
chr11	5801563	5803108
chr14	9147655	9151878
chr2	165526294	165531808
chr5	76791435	76794737
chr10	61055797	61061449
chr5	112526035	112529048
chr7	125586446	125592388
chr2	167062866	167067601
chr10	61087189	61089145
chr11	6505000	6506994
chr13	66162737	66163301
chr1	60098640	60101314
chr1	134624791	134640538
chr7	152080241	152086547
chr11	56385693	56386188
chr18	25911374	25912703
chr1	135224621	135229903
chr10	61398432	61400781
chr8	123320622	123327195
chr1	19198900	19208816
chr2	181046657	181050138
chr4	114506930	114520354
chr8	123349320	123364430
chr8	123368756	123371096
chr4	114558578	114561962
chrX	33865893	33866252
chr6	122503459	122506678
chr4	114723801	114743146
chr3	146192405	146194608
chr7	152499157	152499714
chr8	3475252	3476939
chr3	103487389	103488102
chr8	123470715	123479269
chr2	28862597	28868264
chr8	123480117	123491626
chrX	158344964	158347414
chr18	66563570	66565470
chr1	59540022	59541260
chr4	128291808	128296596
chr18	66616572	66619664
chr18	66620341	66621890
chr17	34553087	34558889
chr14	35012658	35016577
chr10	43294966	43302634
chr7	139331150	139331466
chr5	120522985	120524115
chr7	139341766	139347462
chr17	32324995	32327841
chr6	51559910	51564173
chr6	112782575	112783287
chr4	98827834	98834760
chr7	139155944	139175029
chr19	47224982	47227675
chr17	32593929	32594644
chr8	73384799	73389372
chr8	73459406	73461480
chr5	108146008	108158732
chr5	119005562	119006903
chr5	114230488	114238255
chr6	91778739	91781700
chr13	54899045	54901535
chr7	53123575	53127473
chr5	114512565	114518669
chr17	27348039	27349201
chr11	96310786	96320782
chr11	78210507	78218869
chr3	66023578	66025027
chr4	34006729	34012720
chr16	90140368	90145277
chr11	96573102	96577675
chr5	108813027	108816335
chr14	30821286	30822876
chr5	119230270	119232136
chr10	80350304	80352333
chr8	73967361	73968853
chr8	74080469	74085984
chr17	73652221	73655333
chr10	80445651	80447216
chr10	80483470	80488818
chr10	80691177	80695124
chr10	80701793	80706359
chr5	120561458	120563470
chr14	31166830	31169166
chr10	80713538	80718062
chr10	80719101	80723803
chr9	56673184	56676168
chr5	113894053	113900479
chr19	38116810	38118201
chr9	118206682	118208331
chr16	90152258	90153061
chr16	90167917	90171139
chr16	90175795	90177185
chr16	90177402	90179674
chr16	90189030	90190014
chr8	74153404	74155055
chr10	82288026	82288256
chr5	100737427	100739304
chr11	18924727	18929247
chr9	71108256	71109523
chr8	74176519	74180461
chr13	48357590	48359590
chr8	74181305	74184819
chr19	38170121	38174357
chr9	72654077	72656623
chr9	56691772	56693416
chr5	113909477	113912984
chr9	56725788	56727770
chr9	56732200	56736873
chr16	90201945	90203246
chr9	118296603	118299429
chr9	118310245	118310767
chr5	46029294	46032268
chr9	119064210	119067528
chr7	138831231	138840210
chr8	39721728	39724613
chr8	41369916	41373962
chr4	124941950	124965261
chr8	110465163	110472768
chr7	138933930	138940162
chr5	120150141	120160194
chr13	95629310	95648475
chr19	60541206	60546502
chr19	24956592	24959484
chr7	72787035	72788239
chr10	21873102	21883397
chr4	136829329	136845763
chr2	135883213	135887455
chr7	37461489	37470562
chr4	137271438	137281037
chr16	28442485	28448884
chr7	37472461	37479522
chr17	28268120	28269120
chr9	62574381	62576597
chr9	47205241	47214568
chr4	154730910	154742125
chr4	154755129	154763843
chr9	47243549	47252412
chr2	70059505	70061033
chr15	75530359	75536392
chr15	75538376	75547280
chr13	83874867	83876083
chr17	69471509	69472464
chr5	91068617	91070553
chr15	75558307	75579706
chr19	25669836	25701058
chr17	69782972	69783901
chr6	29666924	29671348
chr6	29697624	29699137
chr14	61673597	61677826
chr15	27607318	27611685
chr11	76433158	76439270
chr4	125154513	125172203
chr19	25738371	25753204
chr17	28487900	28491929
chr10	45187615	45193824
chr11	96961182	96963536
chr11	77752173	77762178
chr11	77762633	77765923
chr15	75863483	75868215
chr14	112073699	112077570
chr5	103802538	103805614
chr7	29908839	29911299
chr7	29912314	29912760
chr17	72949518	72955389
chr16	57391489	57391891
chr5	91085430	91088238
chr2	117163153	117169600
chr15	76760894	76764972
chr2	5057182	5062630
chr11	84388409	84390444
chr11	84403118	84413966
chr8	23162421	23164372
chr10	49507982	49510567
chr5	120544875	120547784
chr3	66768012	66770384
chr5	108974317	108984558
chr13	54950976	54966833
chr17	32944148	32947222
chr11	84417387	84422511
chr11	68963835	68968395
chr11	68969032	68974456
chr11	68977344	68980519
chr11	69009765	69013417
chr17	28510218	28514372
chr17	28515376	28518222
chr17	28520112	28520785
chr19	5068106	5069563
chr9	63617338	63623860
chr7	29802593	29806594
chr5	104084478	104085973
chr19	5074412	5076938
chr19	5078966	5086559
chr19	5444781	5445914
chr10	114607903	114609263
chr10	75032197	75034687
chr7	29943055	29945060
chr1	6372954	6373263
chr12	102145269	102147204
chr5	91188010	91189178
chr2	147094140	147096480
chr11	81331168	81331810
chr11	81346563	81347971
chr15	98615595	98624670
chr5	24128342	24131031
chr9	113963908	113968458
chr13	56706223	56708327
chr13	56709196	56712922
chr13	56794022	56796103
chr15	98724448	98729711
chr4	130889711	130900483
chr11	99209547	99212451
chr12	118389121	118395089
chr16	97829802	97833363
chr12	57786463	57802728
chr15	98923662	98930772
chr4	115554471	115566760
chr4	115568184	115578280
chr2	28896507	28902561
chr11	115125519	115130434
chr8	116369726	116375792
chr8	3629156	3631672
chr2	74974434	74977829
chr12	57803337	57804129
chr19	48277612	48283429
chr6	124717576	124721186
chr4	115598641	115624599
chr8	123561708	123568299
chr12	5379099	5385295
chr4	130962869	130974633
chr12	118487797	118491172
chr15	101598814	101603114
chr15	80444719	80447803
chr7	16742438	16745215
chr7	16754827	16759293
chr1	21950122	21953511
chr15	99049757	99050990
chr5	24283395	24285371
chr6	124804757	124810275
chr6	124811219	124816991
chr6	114076091	114083152
chr11	115200239	115212885
chr11	115719210	115724907
chr2	102389073	102392546
chr5	34627988	34632147
chr6	124939833	124954945
chr4	115682715	115691888
chr2	29459542	29462206
chr2	29601119	29605067
chr2	92716761	92721966
chr15	99335827	99337093
chr12	58297463	58299709
chr1	131167854	131172555
chr14	13653743	13655728
chr15	48617446	48626463
chr15	81045453	81048056
chr15	81064592	81070634
chr15	99373280	99375383
chr12	8303594	8312320
chr11	57661041	57664600
chr15	81890871	81896277
chr15	81898408	81903703
chr11	116307184	116310616
chr11	116317173	116320046
chr12	58674495	58679008
chr12	59311527	59315347
chr2	181664869	181666004
chr5	34668807	34671310
chr7	58876223	58878387
chr7	58878922	58883999
chr5	121288092	121289811
chr12	81856003	81863296
chr12	82096168	82102202
chr7	148240326	148258778
chr5	137140530	137144492
chr1	24592681	24596792
chr7	148475761	148482056
chr3	152327617	152331959
chr4	128538846	128540292
chr10	61866132	61872584
chr18	67246165	67249519
chr1	88194986	88203051
chr1	88554620	88558448
chr3	66771410	66773114
chr2	65961738	65963653
chr4	154427724	154433076
chr2	65964278	65965931
chr17	35571798	35578598
chr11	97430221	97438944
chr2	172484567	172489564
chr13	97197736	97198096
chr17	36342333	36351133
chr11	97859934	97863258
chr7	35463971	35473778
chr13	97693802	97697159
chr13	55011930	55015790
chr13	49341353	49346407
chr4	137283948	137286392
chr3	107318136	107322385
chr4	137351583	137353262
chr6	137199201	137202682
chr2	151715780	151716049
chr3	108022510	108033136
chr14	120938151	120939055
chr15	98883488	98893481
chr2	172543041	172545771
chr9	119478404	119490057
chr9	71171192	71172572
chr6	113151342	113151908
chr4	150025140	150030063
chr17	33404285	33406524
chr13	97840869	97845666
chr13	73724638	73735363
chr17	68620765	68626986
chr2	139499879	139502037
chr2	139502730	139505674
chr13	13875172	13882185
chr16	90461110	90461410
chr13	97960395	97960677
chr10	83610879	83611229
chr9	119497023	119498486
chr10	5632354	5635338
chr17	8553873	8562389
chr9	119546490	119547224
chr7	35907018	35909636
chr1	156048087	156053835
chr17	8580529	8585176
chr6	113230934	113234893
chr17	36450777	36454516
chr11	98172276	98200287
chr10	22181661	22182004
chr10	84214246	84227061
chr7	35938180	35943708
chr7	37480249	37481123
chr7	35967684	35975854
chr16	18576961	18593438
chr6	113444583	113446132
chr6	113450399	113453432
chr9	57451737	57455606
chr2	129521880	129528242
chr5	48374235	48378041
chr5	49915257	49917550
chr5	52167014	52167298
chr9	71635604	71635840
chr13	13949490	13949764
chr13	14613168	14616606
chr17	8621124	8629391
chr5	114274085	114277219
chr9	118405471	118406845
chr13	54967779	54991356
chr13	55032840	55071974
chr11	112712763	112733473
chr11	69042572	69052303
chr2	143370399	143375437
chr11	69837000	69845274
chr9	122497376	122506972
chr13	88959666	88962727
chr13	53182003	53182800
chr17	70317796	70320625
chr13	53379740	53383715
chr7	29953850	29959007
chr5	21047698	21051826
chr16	35586562	35589415
chr16	96568543	96569554
chr16	35658294	35661784
chr4	109642409	109665513
chr11	69909225	69914834
chr17	28673605	28676412
chr6	8896927	8908719
chr6	84502358	84507935
chr7	29824844	29826720
chr7	130173052	130179647
chr13	89880109	89884093
chr4	114373540	114379772
chr6	84535250	84541052
chr19	46204682	46212789
chr4	41616542	41622296
chr1	6428458	6432709
chr16	95834272	95835300
chr5	129821332	129847180
chr3	45178217	45186509
chr15	34607792	34610389
chr2	118197421	118200855
chr15	34763275	34770219
chr9	122596147	122603796
chr11	70128706	70139564
chr17	28905322	28909618
chr14	68768575	68770059
chr2	118524905	118539668
chr10	51395384	51398410
chr5	120674839	120688481
chr5	120725871	120745889
chr5	120771350	120780631
chr2	172576776	172579914
chr16	63862509	63864230
chr5	91568123	91571043
chr9	122630200	122635198
chr11	33738654	33754186
chr3	5212700	5222439
chr7	105978360	105990896
chr7	106396208	106396838
chr7	106397391	106399393
chr7	30086286	30101334
chr5	120830056	120842824
chr5	120843179	120854986
chr7	124522819	124528066
chr13	55497236	55516882
chr9	122946145	122951524
chr17	29328181	29328567
chr17	29347451	29349337
chr17	29370300	29377535
chr18	43055422	43062117
chr16	96701174	96701924
chr5	121096014	121109808
chr5	121140096	121167729
chr9	20496804	20501646
chr13	41185900	41188864
chr17	24622449	24627773
chr10	115018431	115019287
chr1	168181842	168188433
chr9	49604070	49608259
chr4	139331020	139364087
chr17	24681559	24682507
chr5	130085957	130088850
chr5	116941017	116944913
chr5	137094988	137100267
chr17	25413809	25415568
chr2	118722290	118725181
chr2	168273189	168275645
chr6	30913477	30917681
chr10	52410438	52411903
chr4	46409528	46410737
chr10	52423484	52425390
chr16	67617135	67621734
chr9	64230440	64236942
chr17	24885930	24892534
chr17	24900510	24903483
chr16	65815109	65816658
chr7	106414945	106417847
chr1	11403611	11405617
chr14	69779866	69781046
chr14	69795235	69796964
chr14	69797861	69799162
chr12	118577704	118578128
chr17	35494537	35496913
chr17	35555605	35559321
chr17	35560113	35563574
chr17	35567674	35568255
chr1	184514446	184516092
chr3	83592395	83596634
chr5	143082304	143086844
chr8	9769505	9774930
chr3	84106113	84111264
chr17	3325325	3329213
chr17	3352828	3353447
chr19	6571838	6577030
chr17	35569254	35570645
chr17	35640318	35645216
chr18	74598081	74605368
chr3	152641096	152647392
chr5	143175546	143183659
chr5	112980131	112985887
chr8	24779533	24785535
chr18	67290042	67295271
chr4	144903910	144906767
chr18	31790843	31792387
chr4	128597737	128599174
chr17	35704531	35707556
chr19	6999092	7003823
chr7	149093610	149102142
chr7	149113414	149119846
chr18	67621265	67625477
chr14	18275591	18275871
chr16	5118674	5122522
chr5	137610944	137621140
chr14	34735842	34740808
chr10	62562301	62563890
chr10	93774142	93777120
chr10	94402733	94409814
chr17	5369213	5369633
chr3	129671708	129675488
chr1	23766170	23772539
chr6	17979196	17982851
chr10	40788657	40796440
chr12	119433648	119435068
chr12	119435201	119438546
chr19	10526510	10539292
chr4	147486191	147489565
chr10	42274601	42276695
chr4	128639808	128642606
chr9	97931578	97936365
chr10	79767409	79771056
chr11	11582610	11588999
chr1	184693628	184696369
chr6	119213802	119216439
chr2	154374682	154377531
chr2	168097690	168110010
chr9	117778820	117784871
chr7	81154015	81162126
chr10	79971788	79980298
chr14	35031492	35034283
chr4	147510611	147513099
chr4	128779317	128786833
chr4	147543521	147544626
chr14	35581876	35583851
chr14	35625318	35638212
chr8	47375753	47383637
chr9	20524987	20535116
chr6	144743705	144745197
chr9	46196517	46207943
chr7	36366186	36370438
chr16	20588092	20598981
chr15	100533077	100537950
chr19	24969644	24980499
chr10	22560284	22560889
chr2	35944675	35966143
chr6	137678220	137678549
chr19	40834463	40837622
chr10	22561454	22566358
chr16	20625206	20631564
chr16	28564178	28566413
chr6	113730276	113732342
chr16	20732018	20741721
chr2	130182508	130189899
chr12	34611854	34616144
chr2	37631481	37636055
chr11	21879249	21880141
chr12	110682118	110685808
chr12	34634744	34636995
chr2	38176247	38180383
chr5	52956029	52958085
chr4	151939558	151951065
chr11	21888214	21890243
chr11	21891059	21909037
chr5	101638439	101640003
chr2	38220928	38236471
chr9	47222199	47223784
chr8	125376976	125380290
chr9	55171233	55177546
chr2	38238160	38242843
chr2	151925477	151928613
chr12	106616175	106625848
chr8	75212036	75212819
chr5	145521909	145524110
chr10	77941978	77947573
chr5	29757252	29758524
chr9	57843837	57846330
chr5	148015760	148028593
chr2	163028861	163032357
chr8	125639648	125643987
chr11	99258076	99264389
chr17	8935991	8937899
chr7	53901117	53904186
chr5	148029506	148040748
chr4	101387877	101390757
chr8	85910925	85915614
chr15	92227209	92228597
chr12	34655435	34659634
chr15	92461361	92461861
chr5	148103382	148135216
chr15	7343609	7350230
chr4	101759073	101763027
chr5	58106349	58113754
chr2	163675163	163687272
chr5	64038744	64043142
chr7	53920258	53924690
chr7	128854076	128856785
chr2	163739933	163746732
chr15	98461161	98465183
chr4	139364618	139421866
chr12	57708167	57717902
chr5	24233785	24238192
chr5	130090153	130096120
chr7	131121888	131128533
chr7	131129093	131133366
chr12	102956139	102957323
chr5	117037922	117047776
chr10	10799042	10802757
chr4	44434120	44444326
chr10	127156166	127166853
chr3	107254708	107266936
chr14	21068560	21074046
chr3	107381682	107393658
chr3	107395215	107404367
chr17	34625532	34632920
chr13	56347102	56368662
chr17	34806406	34819169
chr1	12681805	12684963
chr18	33096671	33101991
chr10	12660651	12661707
chr2	168658892	168659312
chr2	168660891	168661409
chr2	119079948	119081574
chr4	139591925	139597311
chr15	99439794	99446227
chr1	63491639	63493289
chr1	186537435	186561358
chr12	117313788	117319194
chrX	136808787	136818284
chr9	61420219	61423004
chr9	42738029	42753210
chr4	46546908	46554521
chr18	44958229	44958742
chr18	44971113	44972850
chr4	139655014	139695047
chr2	119147517	119152834
chr4	139763950	139813004
chr12	103791432	103794557
chr9	42956027	42965689
chr7	71411495	71414443
chr10	12779424	12782427
chr18	45718701	45721146
chr7	73699068	73700008
chr6	28965357	28980462
chr14	67843208	67861938
chr1	63676307	63677537
chr9	43006143	43014870
chr10	14263417	14265360
chr11	4855105	4859981
chr10	76443517	76451232
chr11	5796315	5799731
chr1	187276630	187282652
chr5	37403909	37425377
chr4	151497134	151508911
chr1	156635429	156638119
chr5	112988828	113026331
chr5	113026944	113042723
chr4	151711083	151718415
chr4	151721299	151728767
chr3	128890449	128892300
chr11	81465515	81467855
chr2	119568341	119572025
chr1	136576050	136579597
chr8	128656142	128658006
chr14	70008082	70012120
chr2	119625889	119628105
chr2	168734317	168735337
chr2	168735919	168739377
chr5	96801613	96804087
chr18	47008207	47011191
chr19	6528156	6532887
chr12	119696093	119697943
chr17	35772872	35776998
chr17	6485354	6486014
chr4	43464914	43468490
chr17	6491715	6492572
chr6	22236890	22240276
chr6	22240836	22241388
chr6	22242041	22242377
chr17	23780264	23784613
chr2	168123664	168132530
chr5	113791253	113812921
chr17	36197060	36201918
chr5	113836970	113844465
chr11	16157035	16161562
chrX	66612368	66615176
chr17	23877508	23884179
chr16	93373316	93375008
chr5	113878152	113893133
chr17	36217952	36224819
chr5	113901206	113908627
chr12	120097790	120098854
chr4	43673984	43676510
chr9	61063000	61067022
chr11	118793867	118794788
chr1	5005882	5014789
chr4	147545123	147553971
chr17	36246443	36248938
chr12	120475960	120477772
chr17	8531459	8535818
chr9	118251951	118254871
chr2	162943292	162947501
chr4	128807650	128809707
chr2	155339449	155340688
chr7	105340364	105345732
chr5	35616053	35625609
chr1	6348891	6351775
chr5	113986164	113996556
chr10	90289796	90295647
chr7	25774571	25775908
chr2	103842223	103843950
chr16	93402892	93403618
chr17	36281455	36284098
chr13	3354279	3354983
chr5	114019076	114025990
chr9	118374683	118382596
chr10	26414730	26416368
chr4	43789597	43795534
chrX	136144531	136145814
chr2	168231277	168237037
chr5	91331624	91334894
chr12	111612255	111613709
chr13	41172043	41178812
chr16	93423252	93424265
chr13	41203023	41207373
chr16	93435288	93439418
chr17	8656817	8661146
chr5	114041088	114046807
chr10	29252697	29256394
chr4	129116506	129120656
chr4	129168025	129169410
chr1	9956467	9959843
chr4	129228923	129230795
chr9	61118732	61122207
chr17	24822676	24827828
chr2	155612617	155614578
chr2	168288143	168291554
chr7	128533051	128540088
chr7	69521245	69523743
chr2	147201663	147207890
chr7	64761945	64767075
chr7	64845264	64847948
chr2	163263483	163266322
chr17	43653736	43656893
chr9	89801321	89809517
chr7	26090585	26095134
chr11	118864471	118866174
chr7	26152003	26155208
chr12	111614460	111614851
chr8	123637055	123656480
chr8	123681212	123685707
chr5	114133309	114142177
chr10	32609374	32611113
chr4	129589187	129589605
chr4	129610972	129612546
chr4	129619974	129622183
chr4	129624879	129625502
chr8	123717104	123720667
chr8	123721201	123725979
chr4	129626012	129627884
chr7	69551414	69552177
chr9	61169147	61184625
chr11	118877902	118884229
chr10	67000545	67005206
chr11	118895032	118899313
chr11	118948239	118952311
chr4	147642633	147648646
chr11	118528787	118568131
chr11	118666773	118701951
chr17	12699407	12703659
chr11	118745131	118753424
chr9	14791894	14793808
chr18	80691837	80696663
chr2	69421225	69428918
chr19	42453562	42461809
chr4	154764565	154765674
chr11	94989042	94992455
chr9	47322646	47324648
chr19	42479940	42492000
chr9	47337501	47342143
chr2	169811437	169813859
chr4	137947452	137953547
chr8	86415108	86419453
chr19	42502739	42515305
chr4	137973916	137976581
chr8	125852859	125859650
chr7	112572566	112580849
chr14	55094227	55100234
chr6	64676591	64686577
chr6	142268624	142269820
chr5	64202264	64206030
chr11	95060611	95072419
chr11	95082272	95088439
chr4	134692402	134716348
chr4	134738213	134740399
chr2	160193341	160209822
chr18	81174017	81195010
chr19	42580249	42584971
chr14	56128864	56133433
chr15	94231800	94235017
chr8	126035637	126040353
chr2	172149076	172157732
chr11	95487801	95494214
chr16	91342516	91347356
chr14	56134214	56143525
chr4	154782635	154784428
chr11	95501633	95514632
chr2	163306001	163308529
chr5	53601633	53605760
chr9	56639592	56649201
chr2	70258269	70258556
chr7	128876501	128879249
chr7	128879828	128882338
chr2	33430343	33443083
chr7	88597169	88602315
chr2	163751462	163753179
chr4	138034285	138040564
chr4	134756996	134758174
chr4	134758850	134762415
chr10	119910370	119920151
chr11	50270297	50273436
chr10	119999604	120002477
chr2	163353663	163356986
chr13	58008015	58010576
chr4	119032155	119033657
chr7	133990113	133994704
chr9	75456535	75459916
chr9	75531363	75532091
chr16	92054004	92054793
chr17	44864754	44866707
chr17	43763732	43768748
chr17	44216781	44217235
chr13	21332971	21336449
chr17	44268629	44269861
chr8	126099302	126099635
chr8	126124359	126125103
chr8	126142963	126143232
chr8	126148171	126149937
chr8	126163862	126165604
chr5	114543393	114547310
chr9	120051249	120053996
chr12	120091432	120097052
chr4	151729027	151740440
chr2	83652152	83658389
chr11	114497515	114503850
chr2	158198647	158204511
chr2	158363834	158371878
chr2	115675077	115682315
chr15	101362587	101396717
chr12	76276172	76282964
chr7	147230115	147251646
chr5	135750252	135753104
chr5	136290128	136303099
chr5	136314381	136324090
chr2	158381107	158383719
chr5	37539602	37558815
chr10	18462355	18464258
chr8	128661496	128664863
chr8	128673012	128673714
chr2	147680642	147683063
chr19	4696881	4701871
chr16	10192987	10194349
chr11	81422823	81430349
chr1	136883990	136885347
chr1	136996906	137002920
chr9	61854891	61859909
chr7	29328612	29333961
chr7	29412405	29416964
chr12	114421951	114432070
chr14	69785392	69794597
chr11	81431917	81439150
chr4	131044805	131052053
chr9	43229977	43237788
chr2	158420094	158448763
chr14	26150846	26151275
chr2	119901884	119904453
chr11	6963311	6970238
chr4	116547251	116551254
chr2	158490716	158497174
chr4	73659145	73661204
chr5	37630736	37647742
chr12	102136046	102138973
chr8	128684804	128687442
chr5	113761405	113787220
chr6	125270876	125273243
chr6	125327250	125333551
chr7	29827352	29832821
chr7	29835883	29845762
chr2	162686106	162694467
chr1	174265970	174272196
chr8	49638685	49642318
chr4	151952199	151962256
chr5	98594144	98604932
chr9	98841577	98844937
chr9	98879443	98880439
chr4	140424873	140429599
chr2	22476081	22483948
chr6	85372513	85374678
chr8	91094723	91096639
chr5	37725513	37730753
chr7	75069205	75072764
chr7	75073461	75077182
chr1	66514087	66515553
chr6	125367750	125368850
chr10	77365850	77366437
chr7	51588737	51599267
chr7	51603670	51605846
chr8	123734812	123737551
chr6	99639802	99644494
chr6	99645710	99648942
chr6	51380325	51385958
chr10	77428445	77434487
chr17	25565492	25573993
chr10	77437198	77438417
chr10	77505413	77506829
chr4	116975213	116980380
chr8	123748687	123752855
chr8	123764166	123769344
chr2	163573162	163575691
chr17	44675206	44678049
chr1	121901131	121905415
chr1	178204448	178207824
chr8	15271171	15273250
chr11	80671134	80672053
chr6	85427454	85439733
chr7	67006823	67007587
chr1	172837196	172840790
chr7	26458990	26460837
chr8	123770304	123783642
chr8	123800980	123804864
chr12	87560390	87564290
chr9	34291307	34304203
chr8	116725625	116732270
chr4	44258687	44263170
chr4	44264379	44267384
chr4	129671903	129674190
chr6	121162491	121162996
chr6	121235523	121236608
chr6	121247067	121249062
chr11	118966603	118968679
chr11	118973584	118975455
chrX	91607345	91612460
chr8	123816814	123820879
chr8	123838476	123841680
chr8	123854148	123858767
chr7	17057415	17063228
chr11	119176343	119179222
chr8	123918752	123921521
chr12	112704567	112705330
chr7	17529639	17534807
chr1	173003934	173004745
chr6	114182418	114190458
chr2	92909699	92913343
chr4	117156699	117163657
chr1	107740603	107741652
chr2	24531697	24540765
chr11	119373039	119378545
chr7	26599374	26602504
chr15	84406345	84408010
chr12	9575635	9592109
chr1	173008175	173009519
chr1	173011587	173012259
chr14	66040676	66046020
chr4	131220430	131226902
chr2	156724407	156725174
chr11	119906800	119910577
chr4	117197215	117202897
chr6	114256938	114267030
chr1	122485463	122518170
chr19	54117044	54129851
chr6	114288987	114301191
chr7	70587532	70592819
chr12	11153473	11160044
chr2	25089914	25094951
chr6	114321525	114324578
chr6	114344778	114352250
chr4	148093637	148095208
chr16	93934393	93939044
chr14	22812707	22819068
chr4	44669848	44688528
chr11	119399212	119415968
chr12	37043579	37044039
chr11	99853627	99859778
chr2	69981603	69982202
chr5	64549798	64552858
chr5	5693236	5694996
[truncated: 3,011 more rows]

## Sheet: WT unique H3k27me3  peaks
##44982 WT unique H3k27me3 peaks
chr	start	end
chr5	28008917	28012141
chr17	25673755	25675803
chr2	169004820	169012627
chr16	85898241	85902128
chr12	109098218	109099371
chr12	109118139	109121220
chr13	46105362	46107234
chr18	38147365	38151670
chr17	57234703	57236092
chr17	57236960	57240321
chr5	118136414	118138469
chr5	118139259	118146070
chr14	24577899	24587292
chr14	24594793	24598063
chr18	38182735	38189568
chrX	100286033	100290933
chrX	100309246	100310934
chr8	124049032	124052038
chr4	131385229	131387824
chr8	91524375	91528529
chrX	91887540	91891436
chr14	24602130	24606214
chr18	38209356	38210959
chr14	24607179	24615028
chr18	38218171	38224985
chr18	38244352	38249319
chr3	126065940	126067879
chr17	57335854	57342361
chr17	57350269	57353577
chr4	14224920	14225364
chr4	14758791	14760532
chr5	149606861	149608019
chr4	15129397	15129643
chr5	149608552	149609739
chr4	15244087	15244375
chr8	87002346	87004295
chr5	149623293	149623704
chr8	87007213	87008603
chr5	149631124	149632462
chr6	108954597	108956733
chr4	91068901	91070469
chr6	109125233	109125405
chr1	74973814	74976646
chr6	54103178	54103842
chr8	112805259	112806195
chrX	100492176	100495027
chr6	54109197	54109944
chr8	91607230	91609969
chr8	112808553	112810275
chr8	112811035	112811744
chr19	54385730	54391242
chr4	118321292	118326319
chr11	100115187	100130539
chr12	17067190	17070375
chr7	131792661	131793896
chrX	34697435	34698911
chr7	131794477	131796381
chrX	6517726	6518478
chrX	6626753	6629622
chr3	30397522	30401156
chr11	34233439	34234615
chr11	34242807	34243280
chr14	24643476	24646288
chr11	34253851	34254729
chr18	38255561	38258792
chr11	34255402	34256437
chr11	34301401	34303201
chr18	38362443	38364341
chr17	57417702	57423654
chr17	57435574	57438648
chr14	24718667	24720352
chr18	38442541	38445844
chr8	87014010	87014504
chrX	83335693	83336245
chrX	83337280	83338632
chrX	83358749	83359787
chr5	149645612	149651037
chrX	83362242	83363106
chrX	83436054	83439007
chrX	83442714	83443544
chr8	12591851	12593290
chr8	12606267	12607617
chr6	54113614	54114141
chr6	54115399	54117711
chr8	112813497	112815623
chr8	112816704	112818074
chr6	54147519	54149639
chr2	32186118	32194014
chr6	54150287	54153290
chr6	54157428	54158122
chr8	125283676	125286707
chr8	125290634	125297288
chr11	113682566	113683748
chr11	113689610	113690991
chr4	118481521	118483801
chr12	17255759	17259634
chr6	87469219	87475765
chr6	87484886	87490121
chr15	71756689	71758020
chr5	131048591	131049342
chr5	131050652	131051932
chr5	131147403	131148263
chr5	131177455	131178036
chr5	131189399	131189694
chr7	146158301	146160481
chr17	57463368	57466101
chr7	146166041	146169886
chr7	146170164	146172580
chr14	24829514	24840083
chr11	71498041	71500330
chr14	24841453	24845242
chr11	71506061	71507773
chrX	162946446	162948618
chrX	137664106	137667607
chrX	137669920	137672069
chr9	64313535	64317250
chr9	43561980	43566623
chr8	12608252	12609527
chrX	54253180	54254538
chr8	12675965	12676846
chrX	54255624	54255901
chr8	12677652	12678949
chrX	54261570	54262979
chr8	12679362	12681588
chrX	54267210	54269974
chr8	12684354	12686240
chr4	106161943	106163179
chr11	100141255	100142924
chr15	65755432	65756069
chr19	54550711	54551963
chr19	54554384	54554855
chr19	54562171	54564091
chr4	118335922	118337243
chr11	113729133	113730259
chr19	54565527	54566547
chr4	118345002	118346094
chr15	78261375	78262221
chr19	54567863	54569058
chr4	118351900	118352491
chr15	78266140	78269633
chr2	10748552	10749654
chr11	101742953	101748050
chr15	71802832	71805077
chr2	10793611	10794081
chr12	17615015	17618876
chr2	10842045	10843144
chr11	61818899	61821070
chrX	11995656	11997950
chr5	145324765	145327822
chrX	49826999	49830056
chr5	145333583	145334705
chrX	49357113	49358021
chr7	142584945	142586382
chr7	142587300	142589885
chr7	142597136	142597674
chr1	34951944	34953481
chr5	117130140	117131813
chr5	117138773	117141886
chr11	59391560	59393345
chr1	34979415	34981395
chr11	71523475	71523702
chr5	117143119	117145306
chr11	59408441	59408818
chr7	131815026	131816432
chr11	59426603	59426979
chr9	43567175	43570325
chr11	71527112	71529043
chr7	131823469	131823984
chr9	43573639	43577833
chr9	43587481	43592304
chr11	71534812	71535606
chr1	192933938	192936109
chr5	117155078	117155952
chr9	64351496	64355234
chr11	71536731	71539150
chr9	64356907	64361728
chr9	43592955	43598527
chr9	43614356	43617173
chr7	75502766	75507102
chr9	64365140	64367860
chrX	54286766	54289885
chrX	54294927	54297966
chr4	106178135	106180447
chr6	81712294	81712496
chr6	81713291	81715252
chr6	81717552	81718992
chr6	81719830	81722162
chr6	81724353	81726143
chr6	81726842	81730014
chr6	81735917	81736116
chr19	54571960	54572728
chr6	126504959	126508361
chr19	54576974	54579511
chr4	118356336	118358272
chr6	126509300	126511212
chr6	126517257	126520720
chr15	78282384	78283919
chr2	10980204	10981295
chr6	126526117	126527717
chr6	126529091	126529855
chr15	78291232	78292891
chr2	10983650	10984137
chr6	126530660	126532039
chr5	126171983	126174009
chr15	78293614	78295289
chr1	37668787	37673163
chr2	11005182	11005389
chr4	126945155	126947292
chrX	12042325	12050976
chr2	11020569	11022762
chr11	62561465	62565004
chr2	11023761	11023938
chr3	153370062	153372928
chr3	89131486	89134569
chr18	76992647	76998785
chr5	145449191	145450893
chr18	77017736	77021735
chr8	12051595	12054703
chrX	11743465	11744431
chrX	11745250	11745457
chr1	35043596	35044169
chr1	35060389	35061864
chrX	11750268	11752421
chr3	152811267	152812154
chrX	34720439	34721483
chr5	117160564	117161539
chrX	11753055	11754105
chrX	11756966	11757664
chrX	34750963	34751811
chr7	131876496	131876721
chrX	11761274	11762518
chrX	6644531	6646908
chrX	11763124	11765584
chr9	64375330	64377159
chrX	6647587	6648345
chr7	131914105	131914813
chr9	64388172	64391417
chr9	43624065	43625409
chrX	6648616	6649943
chr9	43630404	43634269
chrX	6660587	6664040
chr9	43638632	43644520
chrX	6664800	6666043
chr1	193723912	193725382
chr9	64400579	64407130
chr9	64410315	64414980
chr9	43694588	43700700
chr4	15581141	15581371
chr4	15631914	15632559
chr4	15806960	15809692
chr5	149658523	149659512
chr5	149666715	149667850
chr8	87061154	87062045
chr4	17780029	17782647
chr5	149672259	149674445
chr8	87062707	87063488
chr4	17955890	17956075
chr1	120691957	120693000
chrX	130698998	130700575
chrX	130718950	130720024
chrX	130751669	130752636
chrX	130755268	130756712
chr1	174288318	174289311
chr8	125279082	125279825
chr1	174289823	174291109
chr6	87392670	87395623
chr12	17057092	17060809
chr1	174324236	174325646
chr8	91743056	91745432
chr1	174335455	174337052
chr15	87615532	87616436
chr4	126955739	126958170
chr8	91758232	91760446
chr4	126988264	126991254
chr15	87617111	87619686
chr6	87413970	87418780
chr11	87532835	87533619
chr8	91763569	91765498
chr14	119225152	119225745
chr11	87533994	87535359
chr15	87621370	87621880
chr3	89362632	89369785
chr11	87540250	87542980
chr3	89484463	89487179
chr14	119239247	119239740
chr11	87547121	87548255
chr5	147202685	147206442
chr14	119241798	119242173
chr5	147210883	147212497
chr14	119245358	119247536
chr13	106081862	106083300
chr17	88247897	88252090
chr18	77566912	77571717
chr18	77576881	77581968
chr13	107947313	107949530
chr1	173015351	173016230
chr1	173180953	173181792
chr1	173299962	173302381
chr1	173305069	173306558
chr3	152830316	152831544
chr3	152833800	152834402
chr1	173313744	173316390
chr5	144040531	144042751
chr2	80014536	80015181
chr3	152841033	152841891
chr2	80104326	80104652
chr8	10164909	10166968
chr8	10167811	10171524
chr11	34309882	34311504
chr5	144097987	144100266
chr11	34330450	34331705
chr8	10183856	10184286
chr8	10185283	10185844
chr5	131191868	131192597
chr8	10187852	10192897
chr3	108042317	108044025
chr5	38369597	38378298
chr3	108163910	108164218
chr5	38379849	38384657
chr5	38388536	38393927
chr5	131228969	131229479
chr5	131240096	131240989
chr9	64473714	64478698
chr4	152298611	152305695
chr5	131247354	131247574
chr4	152308827	152311863
chr4	152324106	152328397
chr7	31219839	31224375
chr5	149893849	149894810
chr8	87075868	87077555
chr5	150068741	150069498
chrX	83446112	83447291
chr5	150075626	150076885
chrX	83448092	83448851
chrX	83458274	83458928
chr5	150165202	150166997
chr1	174382016	174383085
chrX	97817927	97820070
chrX	97821071	97821912
chrX	97823843	97825337
chrX	97827556	97827753
chr6	87419491	87422347
chrX	97828585	97829172
chr8	91766527	91768120
chrX	97829873	97830888
chr1	120700726	120702800
chr12	17076129	17077755
chr1	120703554	120705193
chr15	87622428	87624798
chr1	120733794	120734423
chr6	87423101	87424231
chr8	91768987	91772351
chr12	17099639	17100460
chr14	119255494	119258146
chr8	91772922	91775523
chr19	37520322	37520813
chr8	91776234	91777813
chr19	37574461	37574889
chr8	91802145	91803319
chr14	119264685	119266154
chr13	108171338	108176710
chr19	37606853	37607999
chr4	94105181	94106142
chr9	99216439	99220811
chr19	37760944	37762207
chr4	95484998	95485595
chr9	54661895	54663674
chr7	107132595	107133842
chr9	54847435	54850066
chr10	58401270	58408017
chr9	99649135	99650958
chr2	83466417	83469113
chr1	108712824	108714526
chr2	83537598	83538907
chr1	108757425	108758201
chr8	10193591	10194558
chr1	108783734	108784951
chr8	10195736	10196952
chr1	108838068	108838252
chr8	10200127	10201308
chr1	109233386	109233650
chr8	10201913	10204430
chr2	11825540	11826077
chr3	87555118	87556731
chr7	146180589	146183912
chr3	87557327	87559227
chr5	131264490	131265539
chr5	124314697	124315538
chr7	146193281	146194582
chr3	87559749	87562270
chr5	131270110	131271172
chr5	124331690	124332616
chr7	146197828	146202490
chr1	194042339	194043324
chr7	146212121	146213509
chr1	194061321	194064822
chr7	146217594	146219007
chr3	10138780	10140514
chr2	122168254	122172775
chr3	10141802	10143309
chr3	10147050	10147235
chr5	38410698	38421073
chr9	64487805	64491104
chr9	64492774	64497015
chrX	163799959	163801444
chr4	152328945	152332431
chr8	87087386	87088718
chr8	87089603	87092423
chrX	83494685	83495351
chrX	83502862	83503528
chrX	83513764	83516423
chrX	83517174	83518231
chrX	83535474	83536854
chr8	12698738	12700434
chrX	54298440	54300517
chr8	12714329	12715722
chr1	120735798	120736281
chr1	120736840	120738744
chr1	120759500	120761573
chrX	130822932	130823486
chrX	130839059	130839616
chr1	174394209	174395220
chr1	174396245	174397296
chr4	133781825	133782401
chr1	174400279	174401808
chr2	32195445	32197224
chr1	174404472	174405036
chr1	174405569	174406805
chr2	32199557	32200807
chr4	134351313	134351777
chr6	112496912	112497541
chr4	96402833	96404144
chr11	100146042	100147137
chr6	112499305	112499913
chr11	100148216	100148881
chr4	96523828	96524056
chr11	100151108	100151546
chr6	112518550	112519268
chr11	100208155	100208574
chr4	96650134	96651559
chr7	52486564	52494673
chr9	54928583	54933225
chr11	113744427	113747824
chr11	113758752	113759420
chr7	108667347	108673839
chr11	113771391	113773379
chr5	28422393	28423997
chr11	113783481	113787129
chr7	52606250	52607768
chr2	169184267	169188560
chr5	28437800	28441274
chr17	26454946	26459575
chr4	139859521	139860673
chr2	11990713	11991360
chr4	139867823	139868513
chr4	127129356	127129911
chr5	124334798	124335194
chr7	4056173	4056609
chr2	12610623	12611207
chr7	142598379	142600522
chr4	127136188	127137235
chr7	142606008	142609918
chr4	127139535	127140133
chr7	142612555	142613759
chr3	10149909	10150948
chr5	125216014	125216701
chr3	10155657	10157014
chr7	142616149	142617025
chr3	10168487	10169054
chr7	142623474	142624476
chr5	117167216	117170047
chrX	49388995	49389991
chr5	117170448	117171903
chr7	142632806	142634405
chr3	10173810	10175307
chr4	152339382	152341654
chr4	152342380	152345130
chr5	117179077	117180105
chr5	117184510	117185570
chr5	117198119	117198823
chr7	31265919	31269291
chr7	131935968	131936572
chrX	138527562	138530942
chrX	138606112	138608903
chr2	122462621	122464699
chr2	160275732	160279221
chrX	54322218	54323786
chr8	12722869	12723607
chrX	54324448	54324837
chr4	106190802	106191531
chr19	43505437	43506371
chrX	54329992	54330833
chr19	43507587	43508213
chrX	54345516	54346802
chr19	43509436	43509732
chrX	97839728	97839961
chrX	97840626	97841232
chrX	97847007	97847288
chrX	97847848	97849866
chrX	97851507	97853173
chr11	100214364	100215495
chrX	97854136	97856025
chr11	100215974	100218809
chrX	97861599	97863144
chr11	100219547	100220351
chrX	97863737	97864027
chr1	120769839	120770548
chr11	100492830	100494556
chr1	120785785	120787629
chr19	54586735	54588439
chr11	113788399	113790132
chr15	66113870	66114931
chr11	113795435	113797078
chr19	54591699	54592321
chr15	78314161	78317669
chr15	78324656	78325916
chr19	54612036	54612699
chr2	11079355	11079650
chr15	66277026	66278288
chr15	78374600	78375179
chr16	89701517	89703665
chr2	11082695	11084013
chr7	109410383	109415496
chr15	78376513	78377438
chr2	11096609	11099770
chr7	109424215	109430526
chr7	109432230	109448324
chr15	78387692	78388632
chr2	151509469	151512718
chr7	109466309	109468649
chr2	169428373	169431494
chr12	110326798	110330635
chr4	127145740	127146518
chr7	4112200	4112872
chr9	29338213	29340041
chr4	127152190	127152635
chr9	29360906	29361483
chr4	127163629	127165227
chrX	49396875	49398156
chr7	4124260	4125398
chr7	142637823	142639302
chr7	142640625	142641254
chr9	29460316	29463589
chr9	29465666	29467327
chrX	49419637	49420529
chr7	142641826	142644802
chrX	130458923	130460538
chrX	34791168	34791345
chrX	49426281	49428185
chr1	35075463	35076055
chr5	117199990	117200591
chr1	35163499	35163840
chr7	131937800	131938628
chr1	35164702	35167485
chr5	117202440	117203845
chr1	35171820	35172934
chrX	35089507	35090325
chr2	122491174	122493262
chr5	117215224	117217515
chr7	132013211	132014131
chr9	64516715	64521478
chrX	35093953	35096903
chr7	31278413	31281630
chrX	6668431	6669012
chr7	31295593	31298864
chrX	6669790	6670893
chr16	12004274	12005867
chr5	38579064	38581990
chr2	160314564	160318650
chr4	152372664	152375802
chrX	54346953	54349702
chr4	106206203	106207799
chr6	81736789	81738740
chr4	106214271	106216438
chr4	106217111	106218947
chr4	106219926	106221915
chr6	81763565	81764646
chr6	81765457	81767054
chr6	81772765	81773346
chr1	120788528	120789526
chr1	120808666	120809889
chr9	31336187	31338573
chr9	31345388	31346981
chrX	130854862	130855734
chr9	31348233	31349562
chr19	54628848	54629423
chr4	118368187	118368697
chrX	130874482	130875561
chr6	126535135	126537630
chr9	31372788	31374822
chr9	31378899	31379279
chr19	54632642	54634008
chr4	118369355	118370370
chrX	130891716	130893500
chr2	11199864	11200316
chr19	54636049	54637398
chr4	118371820	118373983
chr15	78393783	78394152
chr4	126999316	126999879
chr19	54658962	54660372
chr2	11211870	11212302
chr19	54663985	54665395
chr2	11219397	11220136
chr4	118399217	118399878
chr4	127018451	127020323
chr4	127023540	127025316
chr11	87566805	87567608
chr11	87568203	87570679
chrX	130463082	130463388
chrX	130466737	130470213
chrX	130481147	130482037
chr1	173445159	173445782
chr1	173495373	173496433
chrX	11766129	11767759
chr1	35182057	35185072
chr1	173507110	173508054
chr1	35204099	35204930
chr2	83780953	83781871
chr1	109393493	109393694
chrX	11778449	11779482
chr2	83877935	83878303
chr3	152852832	152853169
chr3	152861822	152863180
chrX	35105261	35106024
chr3	152867888	152868479
chr7	132058767	132060737
chrX	11785383	11788676
chrX	35108022	35108412
chr3	152869585	152871042
chrX	35109321	35111699
chr3	152873373	152874055
chrX	6676507	6678941
chrX	6682168	6682360
chrX	6684222	6685818
chrX	6688390	6689873
chrX	6699021	6700035
chr3	108198836	108199801
chr6	81846870	81848052
chr18	81289581	81290380
chr18	81291082	81291791
chr4	19417306	19417717
chr18	81307340	81310158
chr8	87093320	87094736
chr4	19829012	19830669
chr5	150181362	150183263
chr8	87098487	87099211
chr4	19852293	19852665
chrX	130938784	130941001
chr1	174430146	174431633
chr1	174450795	174451882
chr1	174469654	174470582
chr1	174471326	174472254
chr6	126556336	126556695
chr8	113900381	113901016
chr6	126558682	126559797
chr8	113903876	113904547
chr6	126560618	126562299
chrX	97865060	97866997
chr6	126567801	126569658
chr8	125352847	125354419
chrX	97867684	97868640
chr6	87425257	87426935
chr14	119305815	119306598
chr11	87600751	87602185
chr12	17165431	17167830
chr11	87604056	87604806
chr6	87435133	87435751
chr14	119434545	119434812
chr12	17208336	17211186
chr14	119442842	119443681
chr6	112667434	112669155
chr4	97342063	97343781
chr6	112670660	112671992
chr19	37792930	37794693
chr19	37797423	37798803
chr1	110784194	110784364
chr1	111878908	111880376
chr1	113650962	113651625
chr2	12965975	12966260
chr2	13495775	13497120
chr2	13531367	13531955
chr3	152884460	152885913
chr4	127168010	127169424
chr5	144107085	144109178
chr3	152894877	152895544
chr7	4127515	4128255
chr4	127170461	127174462
chr8	10209092	10210130
chr7	4161743	4162008
chr8	10222870	10224859
chr3	108200179	108201267
chr8	10233605	10235870
chr3	108219471	108220017
chr8	10248236	10252473
chr5	131277013	131278056
chr8	10252913	10253514
chr3	87574452	87577616
chr5	131279257	131280632
chr3	108254101	108254676
chr5	125227175	125227543
chr5	131285720	131287110
chr3	108263836	108265406
chr5	131292673	131294839
chr3	108274295	108275710
chr5	131295657	131297548
chrX	97870133	97871052
chrX	97885579	97887412
chrX	97890522	97892186
chr1	120810695	120814965
chr6	87436671	87437079
chr12	17237403	17238485
chrX	97900100	97901111
chr1	120850244	120852782
chr15	87647885	87648622
chr1	120869831	120870399
chr6	87437677	87442411
chr1	120891273	120891959
chr8	91812688	91814562
chr12	17240951	17241762
chr15	87649114	87653392
chr15	87653956	87656794
chr6	87445986	87446804
chr15	87657789	87658412
chr7	4170362	4170712
chr2	13672891	13673877
chr7	4187415	4188927
chr4	127186444	127188030
chr4	127189605	127190566
chr5	125234380	125234987
chr7	4224645	4225791
chr5	125239634	125242419
chr9	29594437	29595272
chr5	125244699	125247986
chr9	29604538	29605628
chr5	125248545	125249476
chr9	29635492	29635844
chr7	142645559	142645897
chrX	130486490	130487501
chrX	49449342	49449979
chr7	142646643	142646872
chrX	49453182	49454051
chrX	49459751	49460201
chrX	49462783	49467086
chr9	31381159	31381863
chr9	31397666	31400793
chr9	31402369	31402838
chrX	130943118	130945299
chrX	130947913	130948364
chr2	32203981	32205707
chr9	31420570	31423043
chr8	91832407	91833190
chrX	130956162	130957716
chr9	31424742	31425155
chr15	87661214	87664637
chrX	130958384	130960628
chr8	91839734	91840721
chrX	130964483	130965329
chr8	91843184	91848512
chr2	32430895	32432300
chr15	87670822	87671726
chr2	32435671	32436240
chrX	130503895	130504374
chrX	130514351	130516501
chrX	130519539	130521341
chr1	173508555	173511662
chrX	130529974	130531849
chrX	49468322	49470937
chrX	130535103	130536109
chr1	173518944	173521391
chrX	49487166	49488371
chr1	173530851	173532494
chrX	49494760	49496019
chr1	173542334	173543823
chrX	49516930	49519656
chr1	35233711	35234400
chr1	173580427	173580682
chr1	35268775	35270782
chr18	76311882	76313776
chr1	35299422	35301552
chr1	35303409	35303946
chr1	35312089	35316238
chrX	130973160	130979166
chr1	174500939	174502293
chr8	113929697	113931986
chr8	113939800	113940453
chr8	114204401	114205553
chr8	114411912	114412354
chrX	97908759	97909501
chrX	97910515	97912934
chrX	97913522	97915156
chr15	100776124	100777092
chr15	100785021	100788101
chr2	84699947	84701281
chr1	114313040	114314239
chr1	114768135	114768420
chr1	117961819	117962411
chr15	78571068	78572959
chr1	120892632	120893355
chr1	120896524	120897326
chr1	120902284	120903800
chr1	120905115	120905410
chr1	120935733	120936862
chr1	120942503	120944470
chr1	120956160	120957658
chr7	6184757	6186530
chr7	6197448	6199589
chr15	78586615	78588907
chr15	78589633	78591998
chr2	13692647	13692840
chr15	78592742	78594416
chr15	78602101	78603671
chr2	13734695	13734896
chr2	13814266	13814509
chr7	4251601	4252446
chrX	108864689	108864871
chrX	109008024	109009686
chr12	60562659	60563998
chr12	61301603	61301978
chr12	61467338	61467777
chr12	61532994	61533354
chr15	99509115	99510039
chr15	99510652	99511802
chr15	99767109	99767517
chr2	77797393	77801724
chr15	100211815	100213737
chr2	77818729	77819291
chr2	77827553	77828924
chr2	77830451	77830979
chr7	3157726	3159445
chr9	27550085	27550306
chr7	3218181	3220868
chr9	27566357	27567465
chr7	3264303	3265469
chr9	27580766	27581781
chr7	3303006	3304668
chr9	27586745	27591388
chr9	27595362	27595969
chr12	66911611	66911798
chr15	100485925	100489848
chr15	100514790	100517384
chr15	100517626	100519166
chr9	99584778	99587002
chr7	107336723	107339761
chr5	28163458	28166270
chr5	28167031	28172461
chr10	58467880	58471203
chr7	86963187	86967021
chr2	164437607	164441787
chr5	67577551	67583279
chr7	87016192	87019091
chr13	24082235	24086176
chr13	24095255	24098189
chr12	70101483	70101804
chr15	100526254	100528667
chr2	77831789	77833545
chr2	77843055	77844511
chr2	77845896	77846514
chr2	77863893	77865084
chr2	79091933	79092208
chr2	79094794	79097412
chr4	139695654	139698321
chr9	99693303	99700854
chr10	116991463	116998982
chr5	28178778	28180022
chr10	117015170	117017345
chr10	58549100	58551972
chr7	108586716	108595167
chr9	99705607	99708869
chr9	99743214	99745776
chr17	9479844	9482381
chr2	180272897	180274782
chr7	129547779	129557095
chr7	129557859	129559800
chr9	121039657	121043109
chr19	48271661	48274483
chr19	48275075	48276674
chr6	124526950	124528590
chr6	124712687	124714481
chr6	124716161	124716706
chr6	124728684	124730124
chr4	139712574	139714879
chr7	3336663	3337101
chr9	27614680	27616014
chr7	3337768	3339438
chr9	27636280	27638812
chr7	3340887	3341912
chr9	27655952	27656768
chr7	3348738	3350081
chr9	27828410	27828612
chr9	27841820	27842088
chr13	31789486	31790763
chrX	71411179	71411525
chr17	14675596	14676243
chr19	60559080	60559796
chr17	14679925	14680265
chrX	71416965	71417723
chr4	124982800	124983852
chr17	14697874	14698808
chr17	14715291	14716074
chrX	71422265	71423304
chr2	165306352	165310889
chr4	124996182	124998032
chr2	165322505	165324238
chr2	169191826	169197634
chr19	24962076	24963876
chr2	165325090	165326686
chr4	63565985	63566421
chr7	108674220	108676922
chr2	165328999	165331817
chr6	97410201	97410653
chr7	108677251	108681672
chr2	165334263	165337188
chr4	63568101	63569247
chr9	99748199	99752687
chr9	99753697	99762620
chr2	151314663	151318167
chr2	151428357	151432439
chr5	28432877	28436957
chr14	103379706	103381022
chr19	21604400	21604863
chr19	22211453	22214371
chr11	109096871	109097785
chr11	109099497	109101518
chr11	109107281	109108127
chr2	180332916	180337158
chr11	109111095	109112295
chr11	109112831	109113116
chr7	129566919	129569604
chr11	109114057	109114595
chr7	129595319	129597428
chr15	75075670	75076417
chr13	24225567	24229529
chr8	123573431	123573994
chr12	5410131	5410410
chr15	86674518	86676608
chr12	5420901	5422525
chr15	86690601	86691472
chr2	29057851	29061672
chr15	86715740	86716421
chr15	86722526	86724719
chr15	86727542	86728701
chr15	86729477	86730902
chr12	70128840	70129704
chr12	70188211	70189154
chr12	70193363	70193614
chr12	70209165	70209687
chr15	100583597	100585425
chr12	70231665	70232708
chr15	100586155	100588311
chr12	70543927	70545067
chr12	70610669	70611058
chr2	79268699	79270078
chr5	75681108	75682059
chr6	97418019	97419243
chr2	165340240	165342215
chr4	63590237	63592117
chr5	75684211	75685362
chr6	97424441	97425730
chr2	165342540	165344165
chr6	50170554	50171976
chr5	75698550	75698736
chr8	110525401	110526372
chr2	151432999	151437929
chr2	165349026	165354388
chr4	63606822	63608732
chr5	75780491	75781301
chr8	110536191	110537355
chr5	75782965	75786324
chr6	50588971	50589372
chr5	75787313	75788040
chr6	97449813	97450535
chr6	50612274	50613458
chr13	31824220	31825962
chrX	156240047	156242113
chr12	109275259	109279330
chr12	109286882	109294625
chr2	169218227	169222328
chr12	109305403	109307166
chr5	100167469	100169022
chr15	75080931	75083044
chr19	60063258	60063714
chr15	75083876	75085558
chr15	75097565	75099383
chr19	60216995	60218415
chr15	75099417	75101027
chr17	47601075	47607338
chr7	89002941	89006257
chr15	75108312	75109246
chr7	89100811	89104535
chr19	60247486	60248496
chr2	180474501	180476509
chr11	83506722	83508830
chr7	129640573	129645000
chr2	29094234	29096847
chr15	86733456	86737049
chr2	29101996	29106232
chr2	29106845	29107528
chr2	29113846	29114641
chr2	29120284	29121503
chr4	130977047	130978064
chr2	29128500	29131317
chr4	130978756	130979448
chr4	130991326	130992779
chr2	79291348	79292007
chr7	3351172	3353185
chr7	3355866	3356545
chr7	3387318	3388846
chr7	3389164	3392503
chr12	70754983	70755348
chr12	70884987	70885575
chr12	70894754	70896142
chr8	110545127	110545407
chr13	31826269	31828072
chr8	110550983	110551885
chr13	31850660	31851391
chr6	50626554	50628975
chr17	14716668	14717530
chr8	110558458	110560131
chr13	31861929	31862341
chr8	110563684	110565038
chr17	14724390	14724853
chr7	109401115	109406128
chr8	110589789	110590456
chr13	31862906	31864228
chr2	151440763	151444191
chr17	14729078	14731536
chrX	96596755	96600130
chr2	151445088	151451967
chr13	31866809	31869010
chrX	96600600	96603046
chr1	92366353	92367941
chr13	31869326	31871984
chr1	92379457	92381293
chr17	14735144	14736910
chr9	56455983	56457674
chr17	27146658	27148019
chr12	109334844	109337270
chr14	103416206	103417053
chr14	103447907	103448347
chr14	103454246	103455060
chr14	103505859	103506470
chr13	24382812	24385205
chr14	103762070	103762328
chr2	180495549	180502000
chr19	22377692	22378639
chr14	103899126	103900415
chr17	12310810	12313767
chr19	22521985	22522961
chr14	103902690	103903980
chr5	116119334	116122859
chr2	164803938	164809155
chr2	164813807	164816172
chr11	99277812	99279992
chr11	99286777	99289583
chr11	99291964	99293248
chr15	38149265	38149471
chr15	38806049	38806971
chr19	48297004	48298343
chr15	39070831	39071110
chr19	48310380	48311005
chr12	71460308	71460654
chr12	72371791	72371952
chr15	100625227	100627064
chr15	100644648	100644872
chr2	79528590	79528831
chr2	79536181	79536354
chr2	79567353	79567750
chr2	79576702	79578386
chr4	139758972	139761241
chr1	92401194	92401755
chr17	14743978	14744980
chr1	92417179	92418220
chr17	14751353	14752058
chr1	92432738	92433747
chr17	14774551	14775671
chr8	45449769	45450535
chr17	14779217	14780307
chr2	165369516	165371653
chr15	75327957	75329775
chr8	45820254	45820497
chr9	99894431	99898081
chr13	31907720	31908655
chr8	45901600	45902083
chr17	14783413	14784350
chr15	75333353	75334657
chr17	14788242	14790488
chr13	33180105	33181091
chr17	14792997	14793877
chr19	60695386	60696179
chr17	27209122	27214398
chr9	56503158	56511672
chr9	56512071	56515546
chr7	109449362	109456053
chr11	109146818	109148079
chr11	109149932	109150273
chr15	75117722	75118687
chr11	109155847	109158750
chr15	75173468	75173978
chr15	75187433	75188675
chr2	180543319	180548067
chr15	75191239	75192013
chr2	164876017	164878685
chr15	75203975	75205015
chr2	164887514	164893116
chr15	75216351	75217268
chr17	48379426	48382043
chr2	180580472	180585760
chr17	13410920	13414136
chr17	13418025	13422059
chr19	48311799	48314915
chr19	48315588	48318126
chr19	48335115	48336248
chr6	124824124	124825409
chr6	124826115	124826718
chr6	124859808	124861150
chr4	115661694	115662417
chr4	115667006	115670750
chr12	5438950	5439292
chr12	5461376	5462089
chr7	3450205	3450925
chr7	3451504	3453240
chr7	3461713	3461951
chr12	72513506	72514256
chr15	100649998	100651084
chr12	72538158	72538378
chr12	72627746	72627916
chr12	72633230	72634351
chr17	14795212	14796210
chrX	71431640	71433923
chr8	46159979	46162723
chr17	14814380	14815805
chr15	75377611	75378080
chr17	14816873	14817543
chr8	46164399	46164976
chr17	14826130	14826879
chr2	165378231	165380436
chr15	75389669	75391646
chr2	165380873	165383930
chr7	109462679	109464457
chrX	71438743	71440237
chr2	151598663	151602531
chr2	165403468	165405720
chr2	151615067	151620022
chr2	165408372	165409501
chr19	60768009	60768665
chr2	165412925	165414262
chr5	28572302	28576198
chrX	71446905	71447927
chr5	28583366	28586317
chr8	46172737	46173218
chr13	33251509	33251726
chr17	27352560	27356941
chr5	100519839	100522046
chr11	83601394	83604032
chr11	83605542	83607106
chr14	103904878	103905130
chr11	83612713	83613874
chr14	103942241	103943605
chr11	83620027	83620826
chr2	180729556	180733435
chr14	103963164	103964211
chr2	164948265	164952643
chr14	104045502	104046895
chr11	109186688	109187210
chrX	98892960	98895135
chr1	130487361	130492897
chrX	133256654	133258228
chr8	119578790	119580708
chrX	98935244	98938185
chr12	5472105	5473070
chr12	5512216	5513619
chr15	86740567	86741597
chr15	86742423	86743862
chr15	86746746	86748439
chr15	86749355	86750733
chr15	86751775	86757322
chr15	86776154	86776974
chr2	29166496	29167530
chr4	130994447	130996245
chr15	100659952	100661263
chr2	79581170	79582747
chr15	100662283	100663063
chr2	79583455	79585412
chr15	100663923	100665518
chr2	79586602	79588074
chr15	100671676	100674068
chr2	79599661	79600645
chr2	79604163	79605055
chr12	72804581	72805671
chr13	33270689	33271217
chr15	75399811	75403693
chr13	34221422	34224229
chr19	60774940	60775640
chr13	34511402	34511880
chrX	71455615	71456381
chr13	34626897	34627496
chr19	60793889	60794314
chr13	34628185	34629279
chrX	71468303	71469489
chr2	169432244	169435585
chr13	34729528	34729947
chr19	61000517	61000788
chr7	109476527	109480193
chr13	34732903	34734247
chr5	100548508	100551428
chr13	34743070	34745027
chr14	104576125	104576847
chr2	151625870	151631663
chr14	104787955	104788381
chr2	151632354	151639455
chr13	34836907	34839394
chr19	25130500	25132447
chr7	53220419	53224695
chr17	27362035	27365445
chr7	53233674	53240695
chr17	27434217	27436286
chr15	75222854	75223389
chr11	109707028	109708631
chr15	75279775	75280527
chr1	130695042	130696852
chr8	119599812	119601986
chr15	75292469	75293904
chr8	119602949	119607857
chr15	75301735	75302975
chr15	75304821	75305680
chrX	98986923	98992921
chr15	75325923	75327154
chrX	98997136	98999360
chr7	25501585	25504785
chr4	128313729	128316609
chr4	128318202	128320643
chr7	25517739	25522597
chr2	29168173	29169897
chr4	130996343	131001795
chr2	29173440	29175918
chr4	131002149	131003170
chr2	29177274	29179038
chr4	131004138	131005115
chr4	131009055	131010654
chr11	99313722	99316365
chr11	99320179	99322225
chr11	99322869	99324239
chr13	34851122	34851933
chr14	104810943	104811787
chr13	35008353	35009153
chr14	104825682	104826524
chr19	25185518	25186883
chr1	132746296	132748338
chr14	104828372	104829718
chr1	132809190	132809408
chr4	63635668	63636381
chr1	132890423	132893904
chr2	169455676	169462015
chr6	97452938	97453777
chr1	132916449	132916946
chr2	151656295	151661706
chr19	25199199	25199523
chr1	133001214	133001498
chr6	97454493	97455465
chr19	25202080	25202595
chr2	151675634	151679334
chr4	63677817	63679225
chrX	99207517	99210644
chr17	27469318	27472653
chr17	27479070	27481567
chr12	110335503	110340756
chr2	169469270	169473202
chr11	83633232	83634498
chr14	104076180	104077747
chr11	83638150	83638856
chr14	104099738	104100943
chr8	119659903	119662786
chr11	83643049	83644805
chr7	25532882	25540667
chr11	83645804	83646919
chr9	42151859	42153908
chr14	104401379	104401631
chr7	25541323	25545319
chr11	66647827	66649997
chr9	42177305	42184032
chr11	66658250	66658736
chr6	118166032	118167280
chr6	118172711	118176966
chr6	118187714	118190079
chrX	99052740	99055785
chrX	99063174	99066694
chr11	99324803	99326190
chr15	39489844	39492054
chr11	99338354	99339259
chr15	39581205	39581951
chr19	48351416	48351631
chr15	39687033	39687777
chr19	48369383	48369850
chr19	48445169	48446390
chr19	48464150	48464716
chr6	97462622	97464263
chrX	99211526	99215772
chr1	133128968	133130237
chr19	25546201	25546767
chr1	133133153	133133516
chr6	50648613	50649224
chr4	63701556	63702984
chr6	50671640	50672008
chr1	133149238	133150781
chr4	63703791	63704957
chr12	110351116	110355793
chr1	133155172	133158207
chr6	97471398	97472781
chr1	133159351	133159586
chr4	63705410	63709514
chr5	100650126	100655346
chr2	151680477	151686548
chr6	50681725	50683642
chrX	99229051	99233530
chr1	133163504	133164083
chr5	28893680	28896152
chr8	110620917	110622277
chr5	28920944	28924504
chr17	27526766	27528033
chr2	169558772	169561461
chr13	48497526	48500742
chr17	27571488	27575880
chr11	66671824	66673069
chr11	109768969	109770001
chr11	109771768	109772380
chr11	109809414	109809887
chr11	109847679	109848965
chr4	144834303	144841746
chr11	109896300	109896592
chr7	25546240	25554142
chr11	32025178	32029981
chr4	128519750	128521634
chr11	32035929	32039862
chr9	42191398	42192777
chr11	32041690	32042477
chr7	25562921	25564679
chr11	32048712	32050381
chr9	42199635	42202538
chr6	118290855	118292429
chrX	99084187	99088212
chr2	27640827	27643045
chr4	115676137	115678726
chr4	115679262	115681582
chr19	48473294	48476350
chr6	125017352	125018053
chr6	125215173	125216974
chr4	116533806	116535435
chr6	125236269	125236962
chr12	5583891	5585605
chr12	5644386	5645738
chr1	133171243	133173782
chr8	110624398	110626088
chr8	120656345	120657038
chr15	75404487	75412094
chr8	46188902	46190860
chr8	120772271	120772599
chr8	120774605	120775206
chr15	75414251	75415647
chr8	46192606	46193209
chr8	121882229	121883017
chr8	121889622	121890283
chr15	75426598	75429391
chr8	121893560	121894489
chr15	75510158	75514694
chr8	121928660	121929270
chr19	61227340	61228124
chr8	46214381	46216196
chr1	133584430	133584838
chrX	71477708	71478664
chr11	32053338	32054359
chr11	32057861	32059454
chr11	32060106	32063004
chr11	66677890	66678591
chr11	66685538	66687507
chr11	66700939	66701989
chr11	66706137	66707858
chr11	66769297	66771093
chr12	5649645	5650104
chr15	86784938	86785688
chr15	86786450	86787102
chr15	86791591	86792064
chr12	5791389	5792000
chr2	29194843	29195991
chr15	86818044	86819669
chr2	29196922	29197532
chr15	86821946	86822770
chr2	29395296	29396224
chrX	99281068	99283748
chrX	71479267	71481493
chr1	133842371	133843168
chr15	75523630	75524379
chrX	71482117	71483429
chr8	46304581	46305025
chr8	121939283	121941236
chr19	61310034	61310757
chr8	121981653	121981940
chrX	71484470	71487447
chr1	133875332	133875648
chrX	71490653	71491796
chr1	134028102	134028421
chr19	61339908	61340463
chr1	134060942	134061521
chrX	71494214	71495667
chr11	109967349	109968900
chr11	110048487	110048750
chr11	110314800	110315355
chr11	32090359	32091701
chr11	32093711	32097560
chr11	32098526	32103099
chr11	32170848	32172218
chr11	32187047	32187723
chr11	32188479	32189687
chr4	109958063	109959460
chrX	57782189	57782405
chr4	109965221	109966038
chr19	45275868	45277325
chrX	57785070	57785296
chrX	57797124	57797981
chr6	84372528	84375283
chr6	84392390	84393178
chr9	105871576	105874868
chr10	125355700	125358071
chr15	30133953	30134709
chr7	139094359	139096992
chr15	30165353	30165706
chrX	11243462	11246509
chr11	55389122	55391009
chr15	30252749	30253157
chr11	55393895	55396722
chr19	45154263	45155734
chr9	105880299	105887734
chr15	30263036	30264107
chr10	125390174	125397168
chr10	125399640	125406259
chr19	45173417	45173760
chr8	77389611	77390680
chrX	74720047	74722498
chr8	77413934	77415116
chrX	74732795	74733967
chr8	77455728	77457433
chrX	74754652	74754878
chrX	74755603	74757230
chrX	74765090	74766156
chrX	74792027	74793497
chrX	74797018	74798489
chr6	84406206	84406778
chr4	111151241	111154654
chr6	84424072	84428074
chr6	84428739	84429478
chr6	84434833	84436784
chr18	82116599	82117600
chr4	39963216	39964304
chr18	82128127	82129457
chrX	91103663	91110884
chr9	46271953	46278116
chr9	64245687	64249829
chr10	59820141	59822672
chr10	59927835	59942026
chr7	105256427	105263133
chr10	59952504	59962531
chr10	59973895	59981027
chr5	120059029	120059820
chr5	120203830	120209770
chr7	139135179	139143097
chr19	45182467	45183629
chr19	45184297	45185475
chrX	11266795	11270756
chr11	76827873	76829166
chrX	11271713	11277519
chr11	76834507	76835539
chrX	11278227	11281531
chr11	55408269	55411037
chr11	76848299	76849001
chr11	55411538	55414387
chr11	76850671	76852108
chr11	55420393	55422854
chr14	64086260	64087988
chr11	76981530	76982206
chr14	64101187	64103071
chr14	64103643	64104177
chr6	55654801	55655009
chr6	55667216	55668424
chr6	55670792	55671336
chr6	55681635	55682835
chr6	55685233	55685396
chr8	77710884	77712079
chr8	77812469	77813021
chr8	77814030	77815079
chr8	78176384	78176560
chrX	74803934	74804864
chr6	7555106	7555931
chr8	90167036	90167881
chr4	40079716	40080703
chr6	7608171	7609019
chr6	7618931	7620410
chr6	7642136	7644006
chr8	90176764	90177299
chr4	40297224	40297832
chr6	7731552	7732041
chr7	71834235	71836033
chr6	8823829	8824979
chr7	71867475	71868467
chr10	60036497	60038877
chr7	71881165	71884898
chr10	60061949	60075359
chr5	137275919	137279610
chr14	30470376	30471983
chr14	30485666	30488488
chr5	128695827	128696533
chr7	144862132	144863992
chrX	53648287	53648988
chr5	128709365	128710327
chr7	144871861	144872911
chr7	144875651	144876346
chr9	105941632	105943920
chr7	144876908	144877326
chr7	139177190	139183143
chr7	144877921	144878713
chr14	64104945	64105626
chr7	139183776	139185706
chr18	82024564	82025994
chrX	53691318	53692499
chr7	144879838	144880794
chr14	64111069	64112836
chrX	11316004	11318643
chr5	106865241	106868704
chr18	82026520	82028527
chr2	172158709	172162582
chr18	82029226	82033039
chr18	82035569	82036965
chr7	123783688	123787663
chr18	82049686	82051118
chr9	105975418	105980658
chr11	96957878	96960593
chr15	30408700	30409758
chr11	96964461	96965745
chr8	12335982	12337210
chr5	147429381	147431136
chr8	12340590	12341306
chr8	12344345	12344813
chr8	12355432	12356900
chr8	12367820	12369065
chr8	79143385	79143916
chr8	12369710	12370714
chr8	80615653	80616256
chr8	12372696	12373210
chrX	74845770	74846717
chr3	90265993	90267318
chrX	74847234	74849136
chr3	90267927	90270145
chrX	74851085	74853162
chrX	74854088	74854725
chrX	74857664	74858516
chr4	102460362	102460961
chr6	55703443	55703661
chr6	55705170	55706635
chr6	8888732	8890121
chrX	90997800	90999700
chrX	91000253	91003342
chrX	91011383	91011770
chr15	30715513	30715716
chr8	14462970	14464877
chr15	30792232	30792834
chr15	30828150	30828659
chr5	120233561	120236269
chr8	14476814	14481486
chr5	120238882	120241762
chr15	30836427	30836790
chr14	30508999	30512421
chr7	106014578	106017686
chr3	153926852	153931806
chr5	120344604	120348502
chr13	100655598	100658348
chr5	137367315	137373137
chr14	30545478	30547701
chrX	53701749	53702266
chr1	42736701	42737736
chr1	42775362	42779622
chrX	12990463	12990842
chrX	12995566	12997637
chr1	42832322	42832823
chr3	55344777	55346792
chr3	55349485	55351373
chr11	77438006	77438910
chrX	13004224	13005835
chr7	139192461	139199639
chrX	13007145	13007665
chr18	10545614	10546242
chr7	139209479	139212523
chr7	139215920	139220247
chr2	172163130	172164471
chr14	64165489	64167097
chr9	106023748	106025476
chr11	96970390	96971586
chr13	54464680	54467187
chr15	30605237	30605945
chr15	30611772	30613190
chr3	90416643	90417885
chr5	127826831	127827303
chr5	127830586	127833311
chr5	127835929	127837576
chr5	127840268	127840774
chr4	102528723	102529778
chr5	127842774	127844328
chr4	102537854	102538183
chr7	144200189	144200716
chr6	55720916	55721193
chr7	144201436	144201802
chr5	127851736	127853000
chr6	55754222	55755785
chr8	80636840	80637624
chrX	50630335	50631922
chr8	80649905	80650639
chr8	80651733	80654445
chr8	80684842	80685575
chrX	74871504	74873165
chr8	80696087	80697302
chrX	57800272	57802064
chr8	14482670	14484680
chr15	30846935	30847613
chr8	14492820	14494317
chr15	30878318	30879243
chrX	57942688	57943519
chr8	14494843	14496175
chr11	87528569	87531167
chrX	57949940	57951017
chr4	111344327	111345862
chr17	27358281	27360411
chr13	100679949	100682411
chr11	87560247	87565355
chr2	75161609	75162751
chr2	25536329	25538775
chr12	85128792	85130416
chr12	85305585	85305804
chr17	27439019	27439999
chr3	154048910	154050396
chr8	119373320	119374101
chr2	101300691	101302243
chr18	10646313	10646474
chr8	119375085	119377081
chr18	10684099	10684351
chr2	101303850	101305080
chr8	119379120	119380545
chr18	10921330	10921689
chr17	72536735	72540756
chr17	72549369	72551237
chr18	10968706	10968995
chr11	97009690	97009889
chr13	54484111	54489095
chr5	120363816	120366703
chr11	97011826	97012303
chr18	11206418	11206675
chr5	120370674	120372965
chr5	128734838	128735972
chr15	30652883	30653712
chr7	139235496	139242525
chr15	30669984	30671341
chr15	30673964	30674864
chr7	123921506	123923997
chr14	64168592	64169996
chr7	123927308	123929110
chr14	64170681	64175310
chr13	96017028	96022728
chr14	64180215	64182333
chr11	52140810	52142113
chr11	52152166	52153233
chr8	26409599	26409806
chr5	137899699	137900194
chr7	149383010	149383991
chr7	149385952	149387467
chr7	149388085	149388796
chr8	26450346	26450628
chrX	50636387	50637616
chr7	144372405	144373641
chrX	70020433	70020819
chr7	149397869	149400714
chrX	50638164	50639548
chr1	40219946	40220143
chrX	70031475	70032218
chr1	40234545	40236362
chr7	149408494	149411283
chr1	40241063	40241986
chrX	74880520	74881462
chr1	40242897	40243425
chr8	80738014	80739583
chr18	77588315	77589429
chrX	74887308	74889037
chr18	77592050	77593282
chrX	74898102	74899223
chrX	12493509	12495350
chrX	74905296	74906429
chr4	102606781	102607145
chr6	55759270	55762579
chr4	102648801	102649831
chr6	55763097	55764903
chr4	102943551	102944543
chr4	111546013	111546639
chrX	57973007	57973764
chr4	111550007	111551929
chr4	111555695	111556718
chr19	45339694	45340569
chr4	111559912	111560584
chr4	111561947	111563290
chr6	84449354	84449710
chr17	27858906	27866076
chr17	27868826	27870486
chr1	179438920	179439632
chr2	101344534	101345217
chr8	23926579	23928096
chr8	85924093	85925224
chr8	119388040	119389589
chr1	179620204	179622940
chr2	101346988	101347819
chr2	101358520	101360913
chr2	101363428	101364954
chr8	124566727	124569367
chr5	128741342	128742473
chr15	83491960	83492802
chr5	128813411	128814246
chr15	83498096	83500296
chr4	142627560	142630480
chrX	53708115	53709371
chr2	26681398	26682970
chr7	144898510	144898901
chr2	26690178	26691023
chrX	53716350	53716981
chr7	144901238	144901950
chr9	106460519	106463272
chr9	106468464	106471721
chrX	53750085	53751226
chr11	52292350	52293268
chrX	53756423	53757389
chr11	52315142	52315697
chr17	72902969	72906119
chrX	53774744	53777436
chr5	120408373	120410289
chr7	144914509	144917798
chr10	124279465	124280722
chr5	120411549	120415334
chr10	124372344	124373281
chr7	139287691	139291325
chr11	78172044	78173211
chr7	139296088	139299960
chr11	78176241	78179056
chr11	78179469	78181946
chrX	11390299	11394466
chr11	78189325	78195139
chr17	31586379	31588493
chr11	52470090	52470934
chr11	52515008	52515796
chrX	70034311	70035735
chr7	149426290	149427815
chrX	70056082	70058276
chr7	149432491	149433337
chrX	70059854	70061273
chrX	12498949	12500297
chrX	45468870	45472244
chr1	40278266	40280489
chrX	45475543	45477083
chr3	154149625	154150527
chrX	45477701	45479306
chr4	47283407	47284287
chr18	77607494	77609114
chr3	154167474	154169252
chr4	47285780	47286439
chr6	55787111	55787830
chrX	12516770	12519789
chr3	154171511	154172683
chr6	55798037	55799773
chr5	147431817	147432270
chr6	55801801	55802806
chr3	154186611	154187875
chr8	80772185	80772846
chr5	147441193	147441801
chr8	80773858	80774732
chr8	80791908	80793275
chr8	80800105	80800546
chr8	80803928	80805552
chrX	74946404	74951497
chrX	74954957	74955780
chr6	84468974	84469680
chr6	84487330	84488186
chr14	64211001	64212630
chr14	64213296	64214127
chr14	64214363	64215638
chr18	82140932	82141451
chr1	179651211	179652196
chr18	82142773	82145350
chr8	24203997	24205997
chr5	34891181	34893376
chr6	127732233	127736113
chr2	26699189	26699528
chr19	42444733	42452899
chr4	142635137	142636983
chr16	9340719	9341936
chr8	24735787	24737814
chr15	83537367	83538181
chr4	142639357	142641333
chr19	42492787	42502449
chr2	26711845	26713503
chr15	87673469	87679724
chr4	128183921	128184693
chr7	144922807	144923929
chr2	26721421	26722126
chrX	53788383	53789349
chr1	42836588	42839398
chr7	25412290	25412688
chr1	42844696	42845141
chr4	128195757	128200955
chr1	42972307	42974111
chr9	40703490	40706337
chr1	42979442	42979995
chr1	42992282	42993832
chr1	43003661	43004386
chr2	172354810	172360700
chr11	52715536	52715871
chr11	52875950	52876399
chrX	13037696	13040552
chr1	43006901	43008889
chr9	106498237	106499999
chr11	97450648	97452230
chr11	97452904	97453601
chr9	106517156	106520371
chr11	97456305	97457681
chr10	124499344	124499640
chr13	54812678	54816080
chr7	139315979	139318524
chr10	124572117	124573373
chr10	124597056	124598427
chr17	31771878	31774643
chr10	124733381	124733874
chr10	124840027	124840365
chr4	47461227	47463316
chr6	38317963	38319237
chr5	147453154	147453826
chr6	38597272	38597793
chr3	130107494	130107864
chr5	147454533	147455087
chr3	130145814	130146380
chr5	147459681	147461044
chr3	130230894	130231141
chr5	147464524	147465904
chr3	130278198	130278507
chr8	12412926	12415068
chr17	89015799	89016767
chrX	74960699	74961355
chr17	89024124	89024988
chrX	74962310	74962698
chr17	89055608	89056344
chrX	74975638	74976751
chr17	89057399	89058649
chrX	74979622	74981840
chr17	89062302	89064797
chr19	41167181	41171262
chr19	41171780	41173285
chr19	41178836	41182023
chr4	102962264	102962666
chr4	103067823	103069726
chr4	103109704	103110150
chr18	82145926	82147517
chr14	64226991	64227719
chr18	82151699	82152548
chr14	64254061	64254227
chr18	82164727	82165227
chr18	82176240	82176637
chr8	90201802	90202985
chr8	90207980	90217545
chr5	90804148	90805586
chr6	8909499	8910124
chr4	40326967	40328074
chr15	87699295	87712097
chrX	136944893	136946302
chr5	35664180	35668627
chr19	42862863	42866807
chr9	40713130	40714781
chr15	87782021	87784540
chr7	25429139	25430107
chrX	149564504	149568674
chr9	40726074	40727900
chr11	59197945	59200765
chr9	40737397	40738517
chr11	33465415	33467460
chr9	40750450	40751286
chr11	33481539	33483229
chr9	40752034	40752848
chrX	13041207	13044488
chrX	13050808	13051590
chr6	117640018	117640274
chrX	13052270	13052860
chr6	117656753	117658313
chrX	13055292	13056125
chr12	85610680	85611605
chrX	13059845	13061543
chrX	13062291	13066806
chrX	13067597	13068816
chr11	78222689	78224120
chr13	96186047	96190583
chr13	109043957	109045040
chr11	78226959	78229513
chr13	96197238	96199410
chr13	109060315	109060963
chr11	78230380	78232148
chr13	96238271	96240391
chr18	12057109	12057699
chr7	124110231	124111728
chr11	53044303	53044928
chr17	72956437	72959393
chr11	53283869	53285505
chr13	54825392	54830864
chr10	124902226	124902453
chr17	73007044	73009164
chr10	124924081	124924837
chr10	125022974	125023519
chr5	137908352	137909605
chr5	137911115	137912799
chr3	130297444	130299109
chr8	26472316	26473415
chr3	90467821	90470156
chr8	26475030	26477215
chr3	130333447	130334658
chr17	89066797	89068884
chr3	90471422	90473906
chr8	26482076	26482730
chr3	90498933	90500183
chr17	89146882	89149057
chr19	41201267	41202895
chr3	90507854	90508837
chr4	103137323	103138030
chr4	103163567	103165596
chr5	127890915	127891162
chr3	90513148	90514060
chr6	55895035	55896978
chr5	127892398	127894174
chr6	55900043	55900594
chr6	55966533	55968961
chr6	55971916	55972680
chr6	55987911	55989698
chr8	80828519	80831381
chr8	80856487	80857948
chr8	90224870	90228275
chr8	90229101	90230182
chrX	91015997	91016248
chrX	91020576	91021973
chr6	11290533	11291308
chrX	91023218	91023723
chr8	90238438	90239319
chrX	91024414	91025719
chr11	59367741	59369598
chrX	91029166	91030916
chr15	87883561	87894785
chrX	91040693	91042976
chr3	27649489	27649932
chrX	10359292	10361100
chr11	33544938	33545797
chr11	33563765	33567396
chr8	119397611	119400164
chr11	33602662	33609739
chr12	85889099	85890616
chr13	24254227	24256995
chr6	117813110	117813393
chr13	56431241	56434164
chr11	33648932	33652832
chr6	117820405	117823169
chr13	109061731	109063741
chr18	12592088	12592471
chr18	12611272	12611542
chr8	119552114	119554606
chr2	101489618	101489849
chr5	120482812	120486567
chr18	12628834	12629268
chr5	120514461	120517687
chr7	139332886	139334487
chr10	125036810	125036999
chr18	12848836	12849218
chr10	125042597	125042916
chr18	12881839	12883742
chr2	172413407	172416209
chr11	53299006	53301772
chr7	124145218	124148004
chr11	53312864	53315002
chr7	124171725	124176225
chr11	53429168	53429567
chr5	120529544	120533689
chr11	53430678	53433208
chr11	53438937	53439802
chr2	172438743	172441814
chr11	53440463	53441523
chr11	53442761	53443066
chr11	53453787	53455767
chr8	26484342	26484788
chr8	26488142	26488438
chr7	149452330	149454667
chr8	26505188	26507648
chrX	70075537	70076911
chr5	127895048	127898843
chr7	149466189	149467302
chr7	149486347	149487183
chrX	50645740	50647015
[truncated: 42,984 more rows]

## Sheet: CKO unique  H3k27me3  peaks
##2086 CKO unique H3k27me3 peaks
chr	start	end
chr19	31738397	31739467
chr8	73379494	73381407
chr7	56502274	56503354
chr15	99519025	99519565
chr14	35382737	35383252
chr14	35428224	35429215
chr14	45289791	45291040
chr4	98807914	98811616
chr4	98813602	98819075
chr12	87708672	87709393
chr12	87720276	87720752
chr10	119730813	119731569
chr10	120172432	120173686
chr10	120489823	120490120
chr10	120745331	120749557
chr10	122515277	122516012
chr10	123634696	123634925
chr10	124825841	124827425
chr4	122853601	122854317
chr4	122872588	122874251
chr4	122875071	122879855
chr4	122885622	122886426
chr4	122916464	122917433
chr2	131377547	131378042
chr2	131638516	131641223
chr8	95390542	95393791
chr8	95395835	95396460
chr1	75416935	75424446
chr4	123819108	123820424
chr19	45341913	45343616
chr8	96676211	96676833
chr4	123913085	123913930
chr8	96677290	96678239
chr8	96694998	96697402
chr8	96698103	96700357
chr1	75500354	75504705
chr1	75513482	75514089
chr1	75539658	75541643
chr1	75542231	75545251
chr3	89716215	89716934
chr4	124035917	124037202
chr3	93253865	93254291
chr3	93255171	93255913
chr19	45354591	45355153
chr19	45355787	45358390
chr19	45361436	45362379
chr8	96702086	96704810
chr8	96705746	96708644
chr11	50812634	50813141
chr11	50844651	50847888
chr1	75545844	75546101
chr1	75546777	75548715
chr1	75564320	75565753
chr11	52037323	52038071
chr19	45746211	45752332
chr19	45753787	45754441
chr19	45755798	45756792
chr8	98192432	98192815
chr1	76734916	76735108
chr2	142883398	142884353
chr15	101236635	101236849
chr15	101240265	101240976
chr5	144111902	144112248
chr5	145116364	145117197
chr5	145117793	145119653
chr5	52509055	52509589
chr5	52958102	52959834
chr19	45805561	45806553
chr8	98207571	98208427
chr8	98209143	98209976
chr8	98218304	98219399
chr2	144160088	144161309
chr19	46218949	46220174
chr19	46221219	46226149
chr8	98223114	98223826
chr19	46836972	46837778
chr1	78309736	78310112
chr1	78394726	78395361
chr8	107793447	107795323
chr8	107802420	107803158
chr1	79852935	79853896
chr1	79854507	79856287
chr1	82283260	82289701
chr19	47330345	47331164
chr19	47914692	47915446
chr1	82712610	82714077
chr1	82715706	82715956
chr6	17413963	17415764
chr6	21163832	21167414
chr11	116180260	116181434
chr11	116610107	116620609
chr11	116626108	116626785
chr11	116773983	116774727
chr9	95449236	95450588
chr9	95452710	95454199
chr9	95481475	95482421
chr9	95489231	95489520
chr9	95537680	95538615
chr9	95539212	95540040
chr9	96788640	96791508
chr9	96820146	96820855
chr9	96824345	96828093
chr9	96828851	96832735
chr9	96833717	96840031
chr4	41453309	41453759
chr4	41454517	41455955
chr9	96840936	96843975
chr9	96844613	96849899
chr9	96916318	96920868
chr2	164977639	164978323
chr9	96929914	96930152
chr4	41644063	41644949
chr9	98513270	98514577
chr4	42926313	42931856
chr4	42936872	42938486
chr9	98882590	98885064
chr4	43531786	43534214
chr4	43536138	43538334
chr4	43713336	43713995
chr7	25266384	25268148
chr6	28781380	28783795
chr6	28940419	28940897
chr6	29345932	29346944
chr6	29382991	29385266
chr7	25972777	25973711
chr13	91601655	91602953
chr6	29867069	29869801
chr6	30349050	30349278
chr13	97837003	97840170
chr4	153797480	153798332
chr4	98820176	98827199
chr4	98835442	98838630
chr4	98841117	98842899
chr4	98843800	98847659
chr4	154002348	154004253
chr4	154004979	154010165
chr4	99311832	99313089
chr4	154010838	154018344
chr4	154019538	154022666
chr4	154044166	154044668
chr19	36420621	36425882
chr19	36614559	36615251
chr8	10903075	10906389
chr8	10977827	10978881
chr8	10979459	10981066
chr8	10981660	10982018
chr18	70211553	70213211
chr8	10997450	10998500
chr2	165976379	165977638
chr2	165978277	165981465
chr2	166033668	166034045
chr8	10999762	11000330
chr8	11013300	11014760
chr18	74222610	74226805
chr18	74982559	74983536
chr8	74031197	74034176
chr7	56942447	56942671
chr8	11685305	11685556
chr8	11700194	11701779
chr8	11725227	11731480
chr8	11734107	11734863
chr8	11858620	11858792
chr19	40941539	40943176
chr11	54116683	54119307
chr11	60835184	60837397
chr17	12106783	12109047
chr17	12123447	12125318
chr9	103661301	103667017
chr17	36297139	36300752
chr16	10392746	10395447
chr18	77954820	77956185
chr18	78032316	78035401
chr18	78036027	78036875
chr14	63857354	63871385
chr14	63872215	63881877
chr16	18594118	18595956
chr15	81523301	81525628
chr15	81767225	81768347
chr17	12818783	12819233
chr18	79302437	79305644
chr5	103807404	103812081
chr12	14154334	14160041
chr9	120184436	120187278
chr17	14325205	14326330
chr15	82234142	82234870
chr2	68699642	68701835
chr6	100118714	100122630
chr15	82773060	82774062
chr4	99334102	99334995
chr4	99768495	99769693
chr4	101091518	101093612
chr15	11836474	11837187
chr15	12011369	12011711
chr15	12561739	12562104
chr15	12666533	12669978
chr13	48368326	48369738
chr15	26237538	26239674
chr13	49239563	49246865
chr15	28084608	28085300
chr4	154688997	154690084
chr4	154697490	154698843
chr4	106500767	106501292
chr4	106982271	106983070
chr15	31096993	31098111
chr15	32174596	32176052
chr13	51887015	51889067
chr4	107111450	107112419
chr4	154843298	154845671
chr13	51935054	51936514
chr13	51988555	51988922
chr4	137231723	137232403
chr4	137233119	137234024
chr10	126347639	126348229
chr10	126378424	126378821
chr4	137884524	137887132
chr10	126568099	126569528
chr10	126596031	126596460
chr4	138353135	138353591
chr10	128023198	128024079
chr10	128025556	128027000
chr10	128369300	128370442
chr10	128370735	128372445
chr10	75021852	75025555
chr11	3528667	3529755
chr11	3649814	3650136
chr10	75277137	75277421
chr11	84573854	84574498
chr11	84578204	84578861
chr10	76147771	76148808
chr10	76494377	76496759
chr8	109132424	109133208
chr8	109954030	109954301
chr11	85731523	85732390
chr1	87912908	87913747
chr2	147844336	147845516
chr10	77852779	77855567
chr11	87171225	87173845
chr11	87475599	87476844
chr10	79178617	79179310
chr10	79179995	79181246
chr17	17404721	17405361
chr15	82887006	82888230
chr15	82919545	82920379
chr6	121079241	121082971
chr5	122346540	122348175
chr5	122389325	122390170
chr5	122495911	122496888
chr5	122497526	122498246
chr5	122499118	122501814
chr5	122502291	122504804
chr5	122510894	122511887
chr5	122550158	122552814
chr11	94273968	94280197
chr2	115886058	115890375
chr5	123401547	123403741
chr5	125742976	125743608
chr12	114166834	114167520
chr15	73438640	73445998
chr15	73543621	73544997
chr4	140794305	140799018
chr11	98515833	98516517
chr12	117834999	117835251
chr4	57150460	57157360
chr4	57444558	57450566
chr11	99180532	99180823
chr12	118601725	118602064
chr12	119427760	119428724
chr19	44960074	44962760
chr10	120476396	120478727
chr2	131778761	131779998
chr1	75487332	75489648
chr1	75551138	75562506
chr11	100392618	100392874
chr11	101122075	101127369
chr19	46214372	46217969
chr8	98220496	98222404
chr8	107797435	107801729
chr13	3613874	3614239
chr13	3618225	3618954
chr13	4560487	4560801
chr11	101653183	101653602
chr13	12196785	12200092
chr19	53743726	53746819
chr16	29837566	29840258
chr13	12201311	12202516
chr13	12423886	12424146
chr3	120963369	120966500
chr3	120970286	120970924
chr9	61722292	61722975
chr19	53747252	53752722
chr2	148578332	148578525
chr10	79344037	79345460
chr10	79432197	79432746
chr19	53866230	53868251
chr8	112603239	112604103
chr10	79641871	79643827
chr11	88075460	88075929
chr10	79652824	79655682
chr10	79777817	79778684
chr2	151526227	151531199
chr9	46870707	46872008
chr2	94065313	94065998
chr9	47167690	47168995
chr2	94112401	94115010
chr2	94116261	94117158
chr2	94119131	94119882
chr2	98175722	98176449
chr1	89096040	89096368
chr9	63339653	63340992
chr9	63399634	63400538
chr19	56794631	56799005
chr19	56799606	56801852
chr2	98177109	98177344
chr8	113927344	113927766
chr9	48673751	48674445
chr19	56850804	56851922
chr19	56900524	56900998
chr19	56902889	56904846
chr2	104580540	104581380
chr2	104689045	104690084
chr2	152406001	152406655
chr9	63614995	63615571
chr9	63647273	63650698
chr6	122658374	122659195
chr16	29786092	29787353
chr16	29796239	29799409
chr16	29810846	29814552
chr16	29815447	29816623
chr6	126557811	126558053
chr16	29841417	29842791
chr1	91883365	91886284
chr1	91888207	91888747
chr1	91889393	91893336
chr16	35159878	35161398
chr3	121425868	121429450
chr3	126864231	126865823
chr3	127200391	127203481
chr3	127544151	127544425
chr1	169525961	169530430
chr16	89831493	89838166
chr6	55063739	55070517
chr10	42713571	42714479
chr10	42738174	42743161
chr10	42855132	42855581
chr10	42887458	42888243
chr10	42901092	42902428
chr14	26110506	26114305
chr12	77809065	77815227
chr4	120339054	120342108
chr1	134053939	134058278
chr10	45007547	45009847
chr10	45054409	45057418
chr8	124777859	124780913
chr1	191988026	191990399
chr10	58115232	58115884
chr18	80492483	80493178
chr18	80518992	80520014
chr18	80558801	80560996
chr8	12870773	12873261
chr8	13198727	13203429
chr8	13213820	13214653
chr6	90411214	90413233
chr3	97856736	97866346
chr10	18564113	18567278
chr8	129614001	129619382
chr2	35068783	35071616
chr18	84110060	84110313
chr12	112660050	112662660
chr11	98247102	98249910
chr3	105253791	105259872
chr15	80485173	80486699
chr18	85885496	85886001
chr8	24253728	24253924
chr8	24256932	24258841
chr8	24259762	24262153
chr8	24262620	24263544
chr11	98698112	98699459
chr10	42890514	42897175
chr16	29877503	29878008
chr16	29894014	29895741
chr16	29912266	29912731
chr16	30013367	30015674
chr16	30022897	30025330
chr16	30029033	30030741
chr16	30044737	30046581
chr15	36069401	36070511
chr6	127026698	127028169
chr13	52673732	52673999
chr13	52920804	52921139
chr15	36655717	36656414
chr15	36884496	36885308
chr16	30047448	30048128
chr16	30053195	30054534
chr16	30055839	30056599
chr16	30058328	30063329
chr16	30119744	30121358
chr16	30128894	30129264
chr16	30153399	30153780
chr16	30155422	30156585
chr15	37132869	37133173
chr13	53106232	53106758
chr13	53392492	53393062
chr15	39024982	39025227
chr13	54280693	54280971
chr7	28231198	28232717
chr6	35233265	35234110
chr6	36337007	36340076
chr15	55738497	55739433
chr15	59973230	59973597
chr15	61818825	61819913
chr4	138358982	138359851
chr4	138478045	138478602
chr4	138505548	138506591
chr4	138514028	138515099
chr4	138647697	138648439
chr4	138891600	138894004
chr6	47728091	47728495
chr6	48575928	48578005
chr7	30066274	30067514
chr10	79796312	79796794
chr10	79810673	79813392
chr11	89174855	89175513
chr10	79908813	79909529
chr12	35535385	35535639
chr13	99464662	99466981
chr10	79924064	79925705
chr10	79926342	79928581
chr11	90248884	90252458
chr11	90548254	90550750
chr15	84299067	84300434
chr13	30836699	30838095
chr19	3411894	3412528
chr8	24373905	24374479
chr19	3413186	3415611
chr19	4100156	4100393
chr2	153352216	153357359
chr3	145882372	145886378
chr19	4989092	4992413
chr19	4474680	4478123
chr15	83998389	83999560
chr17	24348760	24349849
chr15	94458196	94460198
chr13	38240292	38250343
chr15	84440077	84440421
chr15	84444569	84444955
chr17	24940276	24942190
chr10	69031918	69041699
chr4	33071682	33074165
chr8	59830709	59832897
chr15	84983741	84984890
chr15	84985956	84988080
chr15	84999683	85001739
chr17	25547703	25548419
chr15	85008435	85010491
chr15	85011406	85013227
chr15	85018027	85020178
chr15	85027070	85030324
chr15	85031021	85037756
chr2	164898564	164900827
chr15	85040776	85042935
chr15	85051734	85052390
chr15	85563411	85567626
chr5	8366873	8368197
chr5	15438917	15440115
chr5	17078747	17082215
chr5	20200876	20201222
chr5	132091873	132094902
chr5	20877800	20878887
chr5	135143713	135146465
chr5	135147668	135149063
chr5	23853840	23858526
chr5	23859325	23860053
chr5	135457536	135458254
chr5	23893305	23893891
chr5	135580697	135586646
chr13	101053709	101055184
chr13	101057126	101058470
chr12	40859186	40861439
chr12	42209805	42210469
chr13	104119112	104120568
chr11	94104273	94105302
chr10	80270995	80272340
chr10	80303588	80309587
chr10	80393031	80395288
chr11	94272731	94273047
chr11	94293650	94296580
chr10	80396402	80397366
chr10	80435786	80436290
chr10	80454855	80458100
chr11	94359575	94361575
chr10	80463867	80464300
chr10	80655272	80660359
chr13	112386750	112387042
chr10	80706994	80707498
chr10	81055423	81057480
chr10	81075475	81077123
chr11	94936196	94938799
chr4	107635034	107635675
chr4	107836672	107838889
chr4	107887046	107888458
chr10	83281022	83282760
chr9	49813638	49814006
chr4	108553773	108554378
chr4	114078339	114078599
chr9	51572851	51577884
chr1	35996778	35997479
chr2	106533405	106533840
chr2	106535109	106537156
chr11	3658439	3665098
chr11	3686709	3687853
chr11	3761869	3764557
chr11	3775893	3776658
chr2	109532720	109535452
chr2	109724324	109725427
chr11	3778451	3778916
chr1	154610371	154610600
chr1	155586331	155587649
chr11	4164085	4165923
chr1	37741158	37741881
chr2	113837508	113837722
chr9	54539225	54540791
chr11	4957687	4959699
chr1	38892419	38893685
chr2	115683001	115687986
chr2	115908629	115908971
chr1	157573453	157574132
chr9	55180093	55181070
chr5	135829163	135829657
chr5	25265401	25266515
chr5	26335555	26336001
chr5	26421655	26422267
chr13	12432723	12433800
chr11	102137209	102138144
chr11	102251395	102252319
chr11	102469426	102470634
chr11	102474104	102474410
chr11	102493010	102493885
chr11	102505205	102507521
chr11	102510429	102511806
chr11	102512415	102513473
chr13	22111368	22112106
chr11	102621932	102624723
chr11	102815448	102816700
chr11	102818584	102819408
chr11	102828755	102830292
chr13	24729044	24731197
chr13	24877938	24878865
chr11	103503944	103504435
chr9	63651295	63655638
chr9	63656978	63659828
chr9	63698182	63699424
chr9	63727415	63728529
chr3	130845234	130845403
chr9	63729176	63729881
chr9	64237422	64238856
chr3	138404411	138404954
chr2	153386750	153387977
chr9	64949419	64951852
chr2	155438936	155439945
chr9	64957051	64957653
chr9	64975932	64976845
chr1	40062882	40063275
chr2	118487857	118490037
chr2	118498143	118498712
chr2	118499559	118505673
chr1	40886108	40886911
chr2	118545154	118546824
chr2	118548773	118550040
chr6	127868940	127869608
chr6	131383741	131384903
chr6	134537648	134538225
chr6	134539076	134540696
chr6	134541249	134542650
chr6	135129982	135130608
chr6	136608588	136611401
chr6	136804847	136806386
chr6	136894346	136894649
chr15	64306640	64307399
chr15	64308533	64311475
chr15	64459218	64460494
chr15	68758181	68758685
chr6	140793577	140794637
chr15	73414808	73415600
chr15	73428304	73431357
chr15	73447983	73451661
chr15	73456757	73458243
chr15	73459480	73460384
chr15	73467858	73470367
chr15	73472192	73475750
chr15	73476366	73478338
chr15	73479321	73485338
chr15	73514281	73516652
chr15	73516974	73518828
chr15	73530514	73530726
chr15	73629906	73632290
chr15	73664845	73665830
chr3	145643840	145644456
chr3	145645686	145646554
chr3	145691298	145692289
chr3	145695303	145696985
chr9	65238235	65239171
chr2	156300972	156302729
chr2	156444174	156445007
chr2	156446001	156446201
chr2	156606796	156608036
chr9	66894720	66898985
chr3	149180303	149182926
chr3	151766705	151767448
chr3	151768502	151770148
chr10	58395431	58396127
chr10	59656093	59656709
chr10	60374653	60375141
chr10	61571538	61575224
chr8	26624098	26626777
chr7	31834272	31838815
chr19	4840499	4841443
chr8	28183982	28184968
chr17	27553451	27553775
chr19	4940064	4944733
chr19	4994659	4995815
chr19	5001782	5002286
chr8	32286181	32287641
chr4	140393917	140394683
chr4	140512661	140513445
chr4	140793071	140793584
chr4	140799799	140805359
chr4	45774452	45778715
chr4	45780470	45781866
chr4	45782927	45783736
chr4	45858903	45860737
chr4	46051906	46052992
chr4	141638688	141640516
chr4	46228524	46229035
chr4	46318134	46319425
chr4	145728413	145728971
chr11	95388771	95389449
chr10	85961455	85961940
chr11	95805973	95806625
chr11	95808816	95810519
chr10	88807313	88809441
chr11	95946416	95948021
chr11	95954240	95955045
chr11	95981461	95982040
chr17	27794242	27794817
chr11	52576224	52580901
chr11	53528812	53529312
chr11	53840393	53841958
chr19	5307098	5308077
chr11	53842779	53843302
chr11	53882130	53882933
chr1	189821530	189822196
chr7	35975948	35976433
chr7	35998333	35999141
chr7	36000249	36002239
chr1	190516677	190517245
chr7	142953426	142954034
chr19	6435895	6436657
chr1	136129494	136133322
chr7	144672701	144673060
chr8	124751986	124756451
chr2	28300611	28304013
chr2	28494284	28494799
chr15	85649009	85649526
chr15	85651527	85652898
chr8	124983363	124985170
chr18	35811803	35816170
chr15	85654277	85654980
chr15	85861528	85865656
chr17	28480951	28487052
chr7	38145439	38146199
chr18	36091851	36094719
chr1	136980723	136984430
chr7	38408607	38409939
chr17	26473308	26473897
chr8	125758010	125760386
chr7	38513460	38513912
chr7	38552488	38555767
chr7	38556864	38558737
chr7	38559400	38560836
chr2	29049901	29051546
chr19	7198043	7198901
chr19	7217817	7219256
chr19	7219677	7221001
chr17	26965998	26967614
chr17	26968318	26969663
chr18	36359417	36360927
chr11	96002119	96003909
chr10	93084535	93084774
chr10	93097465	93098072
chr10	93103149	93105342
chr16	25038605	25040306
chr16	25040911	25051588
chr16	25053037	25057648
chr16	25058238	25058665
chr14	70853508	70861081
chr16	25066440	25068075
chr8	86534452	86537528
chr14	70866897	70867347
chr14	70927492	70928400
chr14	70952834	70956953
chr2	118713017	118713728
chr2	118717231	118718214
chr9	56690757	56690998
chr9	56708777	56709942
chr9	56711331	56712083
chr16	29717529	29717869
chr16	29725501	29728131
chr16	29735246	29737311
chr14	73929182	73930416
chr5	103845746	103846296
chr5	103846647	103849214
chr5	103849732	103851964
chr1	43220420	43221713
chr9	56712298	56714314
chr9	56715671	56716732
chr5	103852543	103856749
chr5	103868287	103868760
chr5	103991809	103992072
chr4	130804995	130805460
chr2	118991467	118992041
chr9	56718092	56719587
chr19	42160130	42161445
chr5	104874696	104875544
chr5	105013107	105013368
chr5	105180954	105181362
chr5	105354464	105354707
chr5	105356368	105357706
chr1	51751067	51751711
chr9	57029772	57029972
chr8	87311451	87311770
chr4	131470860	131472454
chr5	106918435	106919255
chr1	54249923	54252677
chr2	119562788	119563610
chr5	107231036	107232242
chr9	57543260	57544563
chr1	55567256	55567907
chr5	107734323	107734921
chr4	133617504	133619459
chr5	108117062	108118437
chr5	108123057	108123489
chr1	55570732	55574921
chr1	55579913	55581033
chr2	120071214	120072306
chr9	57674747	57677455
chr9	57686534	57687617
chr9	57745704	57746271
chr4	133807208	133808342
chr4	133848221	133848515
chr4	133901376	133902541
chr4	133912544	133913611
chr4	133923677	133928877
chr2	121181105	121181397
chr4	134008468	134010747
chr11	71948126	71949582
chr12	17451268	17452709
chr17	35833825	35835530
chr17	35836268	35841282
chr17	35864622	35864986
chr17	35868201	35869504
chr15	101897698	101898336
chr15	102185387	102187605
chr14	55194325	55195761
chr15	102513848	102514587
chr14	55397689	55402109
chr15	102563098	102565052
chr15	102615226	102616826
chr14	55740864	55741445
chr14	56110959	56113056
chr5	53648421	53651204
chr5	67986473	67987173
chr5	72893527	72896042
chr5	72896663	72897098
chr5	73257144	73258488
chr5	73728301	73730624
chr11	116799704	116800816
chr11	116802047	116803697
chr11	116805271	116805537
chr11	116928284	116929476
chr11	57659051	57659727
chr11	117274728	117276562
chr11	117291875	117293112
chr11	117297224	117302970
chr17	26970250	26973112
chr15	88882659	88884020
chr2	29114969	29116157
chr8	126152221	126154975
chr17	29353285	29355103
chr15	90878749	90880932
chr16	91256106	91256367
chr18	36507417	36509779
chr15	96475118	96475974
chr15	96883757	96886439
chr8	126274446	126275279
chr5	136276516	136277298
chr5	136347550	136350252
chr16	91599039	91600030
chr1	138036758	138037120
chr2	30804763	30805715
chr5	137044662	137051213
chr16	92339818	92341548
chr16	92477626	92481302
chr18	40415348	40418383
chr16	92493626	92493992
chr16	92495523	92496159
chr16	92608355	92610166
chr5	30442349	30442818
chr5	30889385	30893626
chr5	30919849	30920552
chr5	30927213	30928795
chr5	116864340	116864999
chr5	116897756	116898249
chr6	84473888	84474415
chr5	31040434	31041277
chr5	138163191	138163386
chr5	31247518	31248570
chr5	31399002	31402917
chr5	139047665	139048244
chr5	139230576	139232638
chr5	31436149	31437909
chr5	118467321	118469347
chr5	118471463	118472198
chr5	118487926	118489674
chr12	17512699	17513134
chr12	20238856	20239831
chr12	25257172	25258235
chr12	25258848	25259051
chr11	74195413	74196738
chr11	74332842	74335765
chr8	90793498	90794634
chr11	74336304	74339382
chr11	74347689	74347974
chr11	75006864	75009945
chr12	29150551	29151731
chr19	43616401	43618247
chr12	29983558	29985218
chr11	75681816	75682309
chr12	31104482	31105343
chr8	91279295	91280208
chr1	63326993	63328134
chr12	32241622	32242448
chr1	67155453	67155697
chr1	69151722	69155872
chr1	72257208	72257877
chr9	32149415	32154061
chr6	141197770	141199064
chr6	142545755	142546165
chr6	142699305	142699612
chr9	121684710	121688123
chr9	121689099	121689636
chr2	67403985	67405425
chr2	68321858	68323616
chr2	179754994	179757745
chr6	142932123	142932658
chr6	142937932	142938833
chr6	143964615	143964831
chr2	180088182	180088382
chr6	145120487	145120962
chr2	180119033	180125888
chr2	180137079	180137432
chr6	145393281	145393565
chr6	145402997	145403277
chr6	145787978	145788601
chr6	145810311	145815253
chr6	147101961	147102773
chr2	70173246	70174034
chr9	36860735	36864408
chr9	36951560	36953694
chr11	117366252	117367146
chr11	117475725	117476026
chr11	59116251	59118760
chr11	59119625	59122865
chr9	102407853	102408554
chr9	102591909	102593354
chr2	166255507	166255770
chr2	166611413	166613174
chr2	167198241	167199452
chr2	167203530	167204648
chr2	167205468	167208835
chr2	167209734	167210310
chr2	167214170	167215470
chr2	167658041	167658729
chr2	167708198	167708461
chr2	167720510	167721752
chr2	167986713	167987655
chr9	107568750	107570675
chr9	107832168	107834837
chr7	75085823	75087339
chr7	75088070	75089723
chr7	75091346	75092085
chr7	75092700	75094665
chr17	36249697	36251329
chr17	36292282	36296003
chr17	36316483	36316857
chr19	37501936	37502944
chr8	74469377	74469872
chr8	77736914	77739298
chr19	38193886	38194637
chr19	38555773	38557171
chr8	82809438	82809652
chr5	139317049	139317583
chr5	139321821	139322604
chr5	139323861	139324416
chr5	139334166	139335268
chr19	40940505	40940770
chr13	34435211	34436233
chr5	118810881	118812105
chr5	118817102	118817947
chr5	118839867	118840767
chr8	83865713	83866817
chr8	85387184	85389365
chr11	104092761	104095697
chr5	118892009	118892835
chr5	118903954	118904380
chr8	86145838	86146412
chr13	38236966	38237446
chr13	38253312	38253663
chr12	87758789	87765995
chr12	87766600	87768990
chr12	88321207	88322707
chr12	88323652	88325927
chr17	35580182	35580605
chr7	73725619	73726694
chr7	73727403	73729583
chr11	108782661	108787227
chr13	41315288	41316303
chr13	42397595	42399744
chr12	93092885	93093349
chr12	96933872	96934294
chr12	100138068	100139629
chr12	100154293	100155040
chr13	42904143	42905044
chr13	43010315	43012181
chr13	43677950	43678510
chr12	104563171	104563869
chr12	105678292	105679293
chr9	67478893	67480610
chr9	67606545	67609346
chr9	67610764	67612387
chr9	67676273	67682656
chr3	94163271	94163928
chr4	124156651	124158203
chr9	69756412	69756652
chr3	94975833	94978204
chr3	95776968	95778343
chr3	96010694	96012180
chr3	96016177	96017540
chr9	69989430	69990077
chr9	71036137	71037232
chr3	154001600	154002327
chr3	154182737	154183945
chr3	157587428	157588356
chr3	157589176	157589906
chr15	74582875	74584617
chr7	3418604	3419388
chr7	3422119	3423294
chr13	56704589	56705462
chr9	36954205	36956242
chr9	37234695	37235719
chr9	123832353	123834497
chr9	123840933	123841948
chr9	123842903	123844778
chrM	9337	9947
chr2	71288790	71290753
chr5	149075786	149077951
chrX	8191229	8191744
chr2	71324251	71324735
chr15	75815527	75816521
chr13	58623727	58625966
chr15	75925534	75926443
chr2	71394868	71395946
chr9	40488210	40488620
chr15	76497746	76500027
chr15	76766692	76767741
chr13	60048431	60048729
chr2	71815228	71815740
chr2	71816872	71820833
chr2	72353779	72355428
chr2	72355987	72356550
chr2	72357206	72357859
chr13	60277068	60278028
chr13	60703267	60704155
chr13	64374666	64377420
chr13	67266684	67267024
chr2	180884287	180886877
chr2	73904615	73905181
chr6	100048774	100054273
chr13	68857469	68857802
chr4	147361911	147362329
chr4	46665308	46665787
chr6	100056262	100061023
chr6	100070926	100072705
chr6	100082576	100083462
chr6	100085456	100086731
chr6	100087451	100092793
chr6	100096162	100097736
chr6	100106472	100109820
chr6	100111699	100115194
chr17	57086482	57087019
chr7	106329837	106330966
chr6	100131927	100132815
chr6	100155606	100157859
chr4	48597577	48600754
chr7	106333632	106334721
chr7	106393360	106393615
chr6	100238195	100241407
chr6	100272294	100273119
chr17	63228680	63232252
chr7	106400034	106401167
chr4	148081184	148081959
chr4	148113688	148114350
chr4	148119942	148122137
chr4	148143633	148147033
chr4	148180550	148181393
chr4	57312232	57314103
chr4	57315646	57316601
chr17	66799198	66801552
chr17	36330311	36330923
chr17	36360355	36360740
chr17	36427791	36428544
chr17	36621518	36621981
chr17	37114239	37114799
chr17	37116669	37117307
chr7	79314279	79314576
chr17	43892537	43893011
chr7	80517468	80519043
chr7	80519684	80522924
chr17	43938638	43939661
chr7	80532828	80538041
chr7	80538605	80540316
chr7	80542744	80545851
chr17	44165486	44165807
chr14	57676049	57678373
chr15	102959484	102962960
chr15	102963605	102970444
chr15	102971780	102972566
chr15	102979483	102980470
chr15	103011937	103014665
chr15	103169559	103173318
chr16	5145631	5148773
chr14	60790805	60791335
chr14	61655066	61657368
chr14	61664791	61667559
chr4	3856720	3857344
chr4	3857989	3858202
chr4	3860168	3865543
chr9	71646533	71647491
chr4	6915998	6919049
chr2	160182892	160189316
chr2	160189938	160192623
chr3	96267763	96270272
chr3	96270913	96272980
chr3	96274481	96275270
chr3	96328775	96333199
chr4	9012553	9012743
chr9	72770088	72771212
chr9	72771792	72776074
chr9	72949619	72951870
chr3	96715632	96717110
chr3	96740974	96742081
chr3	96840232	96841828
chr3	96887848	96888666
chr4	10844413	10845169
chr2	162769809	162770589
chr10	62560430	62561483
chr10	63550342	63553489
chr1	191990999	192002263
chr1	195079550	195079783
chr1	195082186	195082631
chr1	195463981	195464418
chr10	68996385	68999090
chr10	69028813	69030536
chr10	69071453	69072153
chr10	69077485	69079057
chr10	69110086	69110369
chr10	6978868	6980508
chr10	7230285	7230532
chr10	7236237	7236484
chr10	7311337	7312564
chr10	7564003	7564649
chr10	69708151	69709108
chr8	126690227	126691486
chr8	126696054	126696637
chr8	126697696	126698391
chr2	31186828	31187074
chr19	10313809	10315379
chr8	36899738	36900674
chr19	10463278	10463743
chr17	29378811	29379065
chr17	29909635	29910947
chr18	43135497	43135769
chr17	29931503	29932975
chr17	29934283	29934751
chr8	40238207	40238655
chr8	40240585	40241155
chr8	41506708	41508951
chr8	127302844	127303916
chr17	30069842	30071959
chr17	30098628	30099311
chr17	30100231	30103351
chr7	51518289	51518935
chr8	46018148	46019592
chr8	46020182	46024005
chr18	46363673	46366896
chr8	46065603	46067554
chr8	46068155	46070419
chr8	46072307	46073161
chr8	46075113	46080865
chr8	46084243	46085649
chr17	30757056	30757325
chr18	46625038	46626681
chr7	51631265	51631530
chr7	51637703	51638673
chr7	51639658	51642301
chr8	46086565	46089223
chr8	46089818	46092590
chr2	31943271	31944230
chr4	57324770	57325167
chr4	149180455	149181295
chr4	149419461	149420843
chr4	149493437	149497665
chr4	58568371	58568797
chr4	63153602	63159375
chr4	150478122	150486182
chr4	150501457	150505311
chr14	73933647	73934670
chr4	150512326	150515797
chr4	64786002	64787351
chr6	100516578	100517467
chr6	101326574	101327279
chr17	69423443	69423710
chr17	69506016	69507810
chr10	93298860	93299940
chr10	93772325	93773434
chr10	93896036	93896327
chr7	114509656	114511605
chr17	71657586	71658712
chr17	71659369	71661327
chr14	77559803	77561147
chr14	99696779	99699388
chr10	105142224	105142704
chr11	96377769	96378861
chr14	102130576	102130767
chr14	106137880	106138430
chr14	106139873	106140980
chr14	106145129	106145753
chr14	106608637	106609149
chr10	110944665	110945247
chr11	96439329	96440659
chr4	134496703	134497648
chr10	116460892	116461503
chr10	116482533	116483642
chr5	112144330	112145045
chr4	134717282	134718128
chr5	112158933	112159405
chr5	112166646	112166886
chr5	112170018	112171796
chr4	134734156	134736739
chr4	134917918	134918971
chr9	58665407	58674977
chr4	135120847	135121759
chr4	135123251	135131529
chr4	135200931	135201938
chr4	135212117	135212727
chr4	135239510	135240214
chr5	75514843	75516177
chr5	80242389	80243740
chr5	89113413	89115073
chr5	89314321	89318250
chr5	91946366	91947736
chr5	93028288	93029450
chr11	61190211	61193422
chr11	61245181	61246236
chr11	62919662	62921274
chr11	63055831	63056490
chr11	118958343	118959090
chr11	118980828	118981160
chr9	108097302	108097575
chr9	108825974	108826910
chr2	168296220	168300986
chr2	168302132	168303003
chr2	168303893	168308137
chr9	108827671	108828509
chr2	168324840	168325758
chr9	110629058	110630526
chr9	110636063	110639411
chr9	110640194	110648518
chr2	168376650	168377344
chr2	168377764	168379877
chr2	168412906	168413822
chr2	168425142	168426958
chr7	149556748	149558630
chr2	32438566	32439114
chr7	150291678	150293647
chr16	93369741	93370605
chr18	56780361	56782368
chr16	93401139	93402198
chr18	58995421	58996644
chr7	150941541	150943114
chr18	60659526	60660813
chr16	93424891	93425227
chr18	60782000	60783770
chr2	33520930	33524172
chr16	95021551	95022082
chr6	88089341	88093930
chr4	135241126	135243678
chr4	135801285	135807831
chr4	136176861	136177348
chr4	136180040	136180657
chr4	136198651	136199398
chr11	77733092	77734918
chr11	79967661	79968286
chrX	53206230	53207232
chr9	41388238	41390616
chr2	74475168	74475664
chr9	41930732	41933088
chr3	9396192	9396945
chr3	10367133	10368203
chr3	14886088	14887106
chr9	115059467	115061213
chr9	116210046	116210430
chr9	116252603	116252945
chr2	170557227	170557942
chr7	80883625	80887094
chr17	45279767	45280007
chr17	45869488	45872530
chr17	45884030	45884819
chr17	45940949	45944283
chr17	45960959	45962666
chr17	45979490	45980066
chr17	46008902	46010544
chr17	46069397	46070186
chr17	46130100	46130277
chr7	86884379	86884827
chr7	86887651	86888313
chr17	46573097	46574960
chr7	86997729	86998331
chr14	63173927	63177132
chr14	63685905	63686201
chr16	14249488	14250614
chr17	46628579	46630405
chr7	88216113	88217495
chr17	46865743	46866476
chr7	88221579	88228812
chr14	63831190	63832860
chr16	16213190	16217314
chr14	63882705	63892142
chr14	63986193	63986598
chr16	17489320	17491123
chr16	17558092	17558967
chr5	120101530	120102996
chr6	88495617	88496527
chr6	88818778	88819188
chr6	88822946	88825837
chr6	89082564	89083151
chr6	90377036	90378661
chr12	109214553	109219121
chr3	97112895	97114518
chr3	97214353	97215026
chr4	125975639	125976151
chr3	97487232	97488892
chr3	97626579	97629746
chr3	97669972	97670580
chr3	97671209	97672553
chr3	97674227	97674453
chr3	97751321	97751592
chr3	97753944	97754635
chr3	97757760	97758978
chr3	97807455	97811284
chr3	97812456	97817062
chr3	97821141	97823441
chr3	97831462	97833007
chr3	97836903	97837333
chr3	97843992	97844258
chr3	97844917	97846399
chr3	97849531	97850704
chr3	97867303	97879892
chr3	97880531	97890935
chr3	97891686	97895867
chr3	97896849	97897856
chr3	97900983	97902380
chr3	19594034	19595226
chr3	21840154	21843426
chr3	21847164	21848750
chrX	120112456	120113055
chr3	21973711	21974830
chrX	120115806	120119705
chrX	120120654	120121348
chrX	120124660	120129424
chr3	25422206	25424014
chr3	25427238	25428226
chrX	120325121	120325394
chr3	25441702	25442324
chr2	75427574	75428512
chrX	120772503	120774059
chrX	120776535	120780634
chrX	121214650	121217224
chrX	121267996	121268463
chrX	121269072	121270283
chr2	76242017	76246221
chr2	76248166	76248866
chr3	28162205	28163434
chrX	121299286	121300009
chr2	77653084	77654957
chr2	78697528	78697911
chr3	32217726	32218245
chr17	74391491	74395085
chr17	80295638	80295874
chr17	82068382	82069470
chr16	17815004	17817105
chr16	18348071	18350872
chr14	66037513	66038149
chr16	20584908	20585597
chr14	66894970	66895545
chr14	67253549	67258549
chr5	93127660	93128500
chr5	93238138	93238898
chr5	96865172	96865447
chr4	128811866	128817155
chr4	128960375	128960982
chr4	128963309	128965883
chr4	128969889	128971072
chr4	129447962	129450106
chr4	129623238	129624193
chr4	129635628	129640533
chr5	100587249	100588664
chr5	100942293	100943657
chr5	100944781	100945416
chr5	101274572	101275520
chr4	129751625	129753522
chr4	129755302	129757015
chr5	102192119	102192865
chr4	129936557	129937252
chr5	103789593	103790168
chr5	103793394	103798555
chr4	129981884	129988788
chr5	103806292	103806735
chr5	103815578	103817100
chr3	101104315	101105445
chr3	101171851	101173135
chr4	128691781	128693240
chr4	128720573	128725277
chr4	128725789	128730529
chr1	158868583	158871055
chr11	8524210	8524435
chr11	8947338	8950392
chr10	13192573	13196503
chr11	9012437	9014808
chr11	9015422	9016536
chr11	11934436	11935706
chr1	165239680	165246198
chr1	165959072	165960060
chr10	20885599	20886782
chr8	119358503	119360091
chr19	59251566	59253541
chr19	59259868	59260544
chr8	120021816	120023289
chr8	120474869	120475119
chr1	93074782	93077643
chr1	93432028	93433331
chr8	129502723	129503684
chr8	129585315	129591012
chr8	121887923	121888772
chr8	121892172	121893016
chr8	121976124	121976805
chr19	61299679	61300455
chr8	129600211	129604696
chr18	61221946	61222995
chr8	122138098	122139065
chr1	94673055	94673355
chr2	3253097	3253672
chr2	3335754	3336316
chr9	3004466	3005149
chr7	152092733	152093952
chr16	30171770	30172255
chr1	94725322	94730785
chr1	94743993	94746282
chr18	63858140	63858902
chr16	30252097	30252385
chr1	95073139	95073808
chr2	6021225	6022776
chr8	3331088	3331291
chr8	3568996	3569332
chr2	34729908	34730521
chr2	6050858	6051570
chr2	6792865	6794117
chr2	6794714	6796379
chr1	106665015	106666052
chr8	4229465	4230103
chr2	35075728	35077451
chr9	13422565	13423203
chr2	35078469	35086001
chr16	31659029	31659905
chr16	32483522	32483688
chr1	120524140	120524953
chr7	123173516	123184405
chr17	85278131	85281593
chr14	115415689	115418762
chr14	115424312	115424647
chr6	114918398	114919904
chr6	114920580	114921787
chr14	115436192	115438324
chr14	115521501	115522309
chr14	119194295	119196305
chr14	122654387	122655677
chr4	136295783	136296343
chr4	136364816	136366581
chr5	103822852	103823562
chr5	103826649	103828239
chr11	68198051	68200379
chr11	68203360	68205538
chr11	68208826	68215404
chr11	121016236	121019631
chr11	121691449	121692615
chr11	69370621	69371791
chr11	69372755	69373117
chr11	121711934	121712960
chr11	69373655	69374033
chr11	69748749	69753035
chr11	69761546	69762536
chr11	69764658	69767466
chr11	69769266	69770208
chr12	8316838	8318071
chr12	11460813	11461098
chr12	16660320	16661262
chr9	20661437	20662129
chr9	20844214	20845008
chr9	21056671	21057171
chr2	38186186	38187509
chr9	21784248	21786081
chr9	21790840	21798023
chr9	21798594	21799851
chr9	119472822	119474277
chr9	119475769	119476626
chr9	119490498	119492608
chr9	119504313	119504997
chr16	35147915	35159179
chr16	37383734	37385636
chr2	35233664	35233964
chr16	38901603	38907720
chr16	38912573	38914264
chr6	50404378	50405536
chr6	50606963	50607322
chr6	50990210	50990760
chr6	51146947	51148382
chr6	51186241	51186671
chr16	96361815	96362222
chr6	51219881	51222653
chr6	51961676	51963677
chr8	10854616	10855263
chr8	10859354	10859923
chr15	78497093	78497642
chr2	35735535	35736245
chr6	52234653	52236039
chr6	52277868	52279059
chr13	113811458	113812135
chr16	96613359	96614057
chr13	114081831	114086278
chr13	114363705	114364805
chr13	114365664	114366149
chr13	114366957	114367431
chr6	54624658	54625853
chr8	10861461	10863087
chr8	10863937	10865451
chr8	10879459	10880661
chr8	10882473	10884193
chr13	115243688	115244788
chr13	115245371	115249848
chr13	115250587	115251906
chr18	67500369	67501930
chr18	67502561	67506596
chr12	72392088	72392581
chr12	72406851	72407804
chr12	72898779	72899560
chr14	7469695	7469965
chr14	8623780	8624611
chr14	8833213	8834417
chr12	73428455	73429022
chr12	73930280	73933961
chr12	73948774	73949510
chr15	79084230	79086015
chr15	79308825	79309554
chr14	18492868	18494494
chr12	74019866	74020577
chr12	74055742	74056284
chr12	74101344	74101715
chr12	74102146	74103186
chr12	74104437	74104822
chr4	136604596	136608251
chr4	136608821	136613171
chr4	136613652	136614218
chr4	136614888	136615884
chr4	136618930	136620103
chr5	113286655	113287141
chr11	82746796	82748525
chr11	83222639	83223013
chr11	83223565	83225217
chr11	83225928	83226816
chr11	83230735	83234135
chr11	83245912	83246708
chrX	121300791	121305015
chrX	121305920	121309733
chrX	121312798	121313135
chrX	121313916	121314730
chr9	43670726	43672475
chrX	122844662	122845527
chrX	122847178	122847501
chr9	43728484	43728887
chr3	32718180	32718868
chr9	43774568	43775747
chr9	43778466	43779529
chr9	43891853	43892589
chrX	143707353	143707884
chr2	90417321	90417817
chr2	90421328	90421791
chr9	21969087	21971204
chr9	21993895	21994439
chr9	120127421	120128706
chr9	120129591	120130771
chr9	120190887	120191291
chr2	44964057	44964916
chr2	44965542	44967444
chr2	44970806	44973100
chr9	24574526	24577223
chr9	24578097	24584070
chr2	49921026	49922764
chr9	24584901	24586481
chr2	172755668	172757454
chr9	120292616	120293653
chr9	27105005	27105951
chr2	172996703	172997765
chr9	120434230	120434441
chr2	56966533	56967279
chr2	60244817	60245223
chr9	30728368	30730427
chr9	30740034	30741846
chr2	61664048	61664491
chr2	61667763	61668324
chr2	61884518	61885389
chr2	63935006	63937650
chr17	48056533	48057435
chr17	48058324	48062289
chr17	48083301	48085141
chr7	88848262	88854415
chr15	79919761	79920494
chr15	79921221	79923646
chr15	79927631	79929711
chr17	8715960	8716546
chr17	8717070	8719237
chr4	115579072	115581565
chr5	120277614	120286147
chr5	120286823	120290862
chr5	120291745	120295468
chr4	116492724	116493753
chr6	90855052	90855742
chr4	117595940	117596974
chr4	117965133	117966307
chr6	91102269	91102957
chr11	12364042	12365554
chr11	18767570	18768645
chr1	166384782	166389771
chr11	20278765	20279636
chr5	120906027	120906925
chr11	23967775	23968866
chr11	23984425	23984864
chr6	91752394	91757582
chr1	169148638	169149318
chr11	30653682	30654084
chr11	30654728	30656136
chr11	31268269	31270527
chr11	31627893	31628486
chr11	32067970	32069075
chr1	169590345	169591948
chr11	33042305	33042989
chr11	33044021	33048649
chr1	172998100	172998426
chr11	97196286	97200685
chr11	97203753	97205468
chr11	97207435	97208242
chr1	172999669	173000259
chr8	123156446	123158515
chr12	112683795	112684878
chr11	97480811	97481599
chr2	90422730	90423320
chr9	44098949	44099271
chr9	44261135	44262381
chr9	44277456	44278387
chr9	44606144	44608122
chr9	44692728	44694341
chr3	35962231	35962632
chr2	91092232	91098415
chr9	44813726	44815007
chr9	44815795	44817373
chrX	166426531	166427528
chrX	166430331	166430733
chrX	166431984	166432965
chrY	1264152	1264417
chrY	1267548	1268418
chr2	91898836	91900527
chr2	92240574	92241697
chr9	44856233	44857001
chr3	37247700	37248476
chrY	1487076	1487494
chr9	44943109	44952359
chr3	40429619	40432287
chrY	1787979	1793741
chr2	92748669	92749155
chrY	2604426	2604858
chrY	2777462	2777776
chrY	2779600	2786096
chrY	2788154	2797435
chrY	2847538	2864084
chrY	2864797	2868419
chrY	2869111	2873463
chr2	92783482	92784395
chr2	92786546	92787596
chr2	92855347	92856563
chr3	53459284	53462018
chrY	2874689	2901093
chr3	54559607	54560349
chr2	93330595	93331471
chr3	58807989	58811503
chr3	58812122	58813328
chr2	93473569	93475694
chr6	116409475	116412724
chr6	116519927	116520151
chr7	128852421	128853165
chr17	48110003	48112640
chr7	88855147	88856540
chr17	48167886	48169502
chr17	48195066	48195465
chr7	89142727	89143398
chr17	48505827	48506737
chr17	49702772	49704019
chr6	99857479	99858920
chr6	99862696	99864750
chr6	99889475	99891024
chr6	99934677	99936997
chr6	99950040	99951384
chr17	51978767	51979443
chr7	100228675	100229717
chr6	99952026	99952294
chr16	21198476	21199154
chr16	21203107	21206999
chr16	21208819	21210814
chr16	21211462	21211757
chr16	21246537	21250163
chr17	56257972	56260021
chr16	21310539	21310871
chr16	21380288	21380621
chr17	56564508	56565854
chr6	100038350	100039526
chr16	22162365	22164357
chr17	56633247	56634670
chr17	56890692	56897405
chr16	23979580	23981368
chr16	23983899	23989256
chr16	25002180	25003423
chr16	25004633	25005205
chr16	25008043	25010526
chr16	25011106	25017482
chr16	25028459	25029857
chr14	70055418	70058451
chr14	70060256	70060823
chr11	97896919	97898104
chr11	98150651	98151331
chr11	98250464	98250786
chr1	121085517	121088617
chr1	121282304	121284068
chr11	98266074	98266489
chr12	113497009	113497279
chr2	18528921	18531164
chr12	113857241	113859859
chr12	113960786	113961862
chr2	18599379	18600370
chr11	98453366	98454084
chr12	114041628	114042320
chr11	98507017	98508498
chr3	101825490	101826583
chr2	18625930	18628087
chr3	104580232	104581069
chr3	105249308	105250678
chr3	106286517	106287015
chr3	107984575	107984914
chr3	108520930	108524800
chr3	108530852	108532306
chr3	108537518	108539838
chr3	108540904	108542298
chr3	108556989	108557947
chr3	108563063	108566411
chr3	108573364	108574425
chr10	30561924	30566158
chr16	43979295	43979829
chr1	128726522	128727652
chr10	39860836	39862418
chr10	40603307	40604697
chr2	23090147	23091730
chr16	52450166	52454363
chr10	42324812	42325092
chr10	42566404	42567159
chr10	42583689	42584826
chr10	42595119	42595876
chr10	42616440	42617692
chr2	24333630	24334195
chr10	42657978	42661114
chr10	42680319	42680950
chr10	42693625	42696938
chr10	42697754	42698970
chr8	10886033	10889814
chr8	10891351	10893785
chr8	10894357	10897148
chr16	78301521	78303266
chr16	78603182	78603547
chr16	89782746	89783860
chr16	89784795	89785048
chr6	117115398	117115866
chr7	129814290	129814866
chr17	86258448	86260221
chr6	118543188	118545413
chr6	119054408	119058144
chr17	86269035	86270070
chr17	86274514	86276579
chr17	86285071	86286501
chr7	133209269	133209715
chr6	119058996	119061467
chr6	119062058	119063808
chr6	119065160	119065741
chr6	119082622	119082961
chr7	133217243	133217961
chr7	133223374	133227877
chr7	133228412	133228923
chr7	133679434	133680768
chr6	119490880	119494834
chr17	89108993	89110021
chr13	43687048	43688244
chr13	43710547	43713430
chr18	3772173	3773114
chr14	122908006	122909004
chr6	121160012	121161815
chr13	44325397	44325723
chr13	44768883	44769976
chr18	7320056	7321590
chr18	7322669	7323273
chr15	6655299	6656775
chr18	10705974	10706316
chr18	11047950	11050317
chr18	11050669	11052382
chr18	12317060	12318619
chr18	12319520	12320539
chr15	8658938	8661627
chr15	10107226	10108660
chr13	46513101	46516646
chr13	46597729	46598629
chr13	46599253	46600318
chr16	89797372	89798485
chr16	89803980	89805263
chr16	89808152	89808814
chr16	89810765	89813461
chr16	89825191	89826224
chr16	89838805	89842700
chr16	89843040	89844364
chr16	89854017	89856123
chr6	65624996	65625604
chr6	71586956	71587538
chr6	71588434	71590380
chr6	72188942	72189696
chr12	74209503	74214773
chr6	82721453	82726190
chr12	74630748	74631738
chr14	25475006	25475519
chr12	75101491	75104048
chr14	26094564	26098006
chr14	26117857	26118598
chr14	26118958	26119690
chr12	77744332	77744579
chr14	27357097	27358028
chr14	27927908	27928934
chr14	28434014	28439055
chr14	31163502	31164068
chr12	81553628	81554542
chr3	63702099	63704517
chr4	119001787	119002348
chr4	119004950	119005972
chr4	119044110	119044388
chr4	119163489	119166503
chr3	67381556	67381760
chr3	68507979	68508298
chr4	119912226	119913045
chr4	119915432	119915788
chr4	119924688	119926132
chr4	119926903	119928965
chr4	119932021	119934599
chr4	119948389	119948966
chr4	119951832	119960519
chr3	80839349	80842241
chr4	119974886	119976833
chr4	119977419	119978005
chr3	82677825	82678105
chr4	120343483	120344492
chr3	82709269	82710325
chr3	84401368	84402045
chr3	86348380	86348943
chr1	173089729	173090565
chr1	173125837	173126289
chr1	173236082	173236418
chr11	34843360	34843890
chr11	35799279	35799821
chr7	51665984	51666514
chr7	51695896	51701163
chr19	16956333	16956577
chr19	16957255	16958025
chr19	17028906	17032107
chr7	51718871	51720123
chr7	51729807	51731164
chr7	51760362	51760810
chr7	51762441	51765371
chr19	17210396	17211311
chr19	17430120	17431693
chr15	97284581	97285261
chr7	51766178	51767930
chr19	19182182	19185029
chr19	23954393	23955433
chr19	24627978	24628664
chr19	24629555	24632382
chr8	59104479	59105580
chr15	97732059	97732828
chr7	51860777	51861117
chr7	51892935	51897285
chr7	51898375	51899740
chr15	97759111	97759850
chr19	24967524	24968408
chr19	25309731	25313593
chr15	97936109	97938097
chr15	97994753	97999538
chr15	98125889	98126839
chr15	98452057	98453344
chr15	98458503	98460705
chr15	98613105	98613956
chr15	98641235	98641914
chr15	99307009	99307848
chr5	139408244	139409211
chr5	139432298	139433233
chr5	139466946	139467917
chr5	139468525	139471130
chr5	139477707	139479190
chr5	139523283	139524463
chr5	139576027	139581163
chr11	41446041	41446284
chr11	43587616	43590409
chr9	58706821	58707820
chr9	58862229	58864414
chr8	92524785	92525549
chr11	43648984	43651496
chr1	177422181	177422885
chr11	45793279	45794946
chr11	46123958	46126981
chr9	59003303	59003712
chr19	44480307	44480916
chr8	92869032	92872562
chr8	94233836	94235310
chr1	72916315	72919495
chr1	182549506	182549841
chr11	50413075	50416652
chr1	72920122	72923037
chr1	73872398	73873290
chr2	127393714	127394386
chr9	59527826	59530319
chr11	50750503	50751557
chr11	50760639	50761028
chr11	50761940	50762750
chr11	50775964	50776803
chr8	94238728	94239051
chr8	94337529	94338111
chr1	74143501	74147043
chr1	74170602	74172082
chr2	127671092	127671980
chr9	60179034	60179280
chr7	135087442	135090281
chr9	60366639	60368264
chr9	60368864	60370723
chr7	135347206	135348277
chr8	123762578	123762845
chr7	135565318	135565734
chr7	136387153	136388077
chr8	94486751	94487423
chr1	74795170	74796674
chr1	74810217	74811175
chr9	60894456	60895282
chr8	123783737	123785119
chr18	15220325	15226404
chr1	133859109	133863132
chr1	133864871	133865956
chr18	16964233	16964552
chr18	16965305	16968453
chr18	16969803	16970631
chr7	138079103	138080658
chr8	94893929	94894661
chr19	44884919	44885898
chr8	123835162	123837366
chr8	123851559	123851930
chr8	123852758	123853385
chr19	44946584	44947375
chr5	139610171	139611420
chr5	139654322	139655254
chr5	139758363	139759272
chr5	139767032	139767730
chr5	139984507	139987178
chr5	139990513	139990823
chr5	139991455	139992931
chr5	36101185	36102685
chr11	109333317	109334055
chr11	113826367	113826749
chr11	114045366	114046361
chr11	114065764	114065952
chr9	75079413	75081329
chr9	77392515	77396048
chr2	163163348	163166606
chr2	163200977	163202119
chr9	85219853	85222360
chr9	86588753	86590183
chr2	163585404	163585818
chr9	86906231	86907594
chr9	86912807	86913176
chr18	20903460	20905988
chr19	44948643	44950071
chr19	44954069	44959448
chr1	75215868	75218190
chr2	25250982	25253096
chr8	123868130	123869368
chr8	123883079	123884309
chr18	21309806	21320577
chr19	44967948	44968607
chr1	75319043	75319307
chr1	75334773	75335520
chr1	75341103	75342452
chr1	75355383	75360686
chr1	134194590	134197402
chr18	21473245	21474528
chr1	75361268	75361508
chr1	75365695	75366891
chr1	75370244	75375694
chr1	75376392	75379406
chr1	75380227	75380620
chr1	75381265	75386736
chr1	75414847	75416293
chr5	149447519	149448271
chr16	89874345	89875524
chr16	89909653	89910627
chr18	24868055	24869629
chr1	134714204	134715511
chr1	134749936	134750600
chr1	134773008	134774133
chr7	4850832	4851198
chr7	4852787	4853015
chr7	4891647	4892275
chr2	26940035	26940525
chr7	4904329	4904841
chr5	150899821	150900366
chr7	7252237	7253417
chr1	135077517	135079873
chr6	5025379	5026594
chr6	5026972	5028336
chr6	5029275	5032275
chr6	5034243	5036508
chr7	16715339	16718809
chr6	5056313	5057292
chr2	27352257	27353653
chr2	27354369	27358265
chr16	90150503	90150923
chr7	17065079	17066078
chr7	17469671	17472358
chr6	5955816	5956713
chr6	6308518	6308774
chr16	90186457	90187534
chr7	17544879	17545677
chr16	90196264	90196909
chr16	90371992	90372222
chr16	90380397	90380654
chr16	90381446	90382016
chr16	90520652	90521806
chr16	90526411	90527958
chr7	19749054	19750736
chr7	19751509	19752851
chr9	87621942	87622544
chr4	28739868	28743317
chr4	32022881	32025214
chr4	33275987	33278032
chr9	91286825	91287432
chr4	34676925	34677438
chr4	34958369	34959592
chr1	9953473	9954792
chr1	12980204	12982189
chr8	59789999	59793316
chr8	59794104	59794891
chr8	59796681	59802720
chr8	59805118	59815717
chr8	59821373	59822120
chr7	51900716	51901475
[truncated: 88 more rows]

## Sheet: Shared H3K27ac peaks
##20799 shared H3K27ac peaks
chr	start	end
chr10	57785272	57787296
chr10	57803944	57806870
chr10	57816622	57819373
chr19	44358301	44359584
chr19	44367839	44369287
chr19	44387804	44390120
chr19	44462049	44463644
chr1	133049544	133050627
chr7	90013723	90017030
chr6	118783036	118785522
chr6	118788774	118790088
chr6	118797504	118799109
chr10	40348439	40352177
chr10	40356767	40358417
chr10	40402437	40403354
chr19	44619189	44620551
chr19	44627946	44630246
chr7	106854248	106856339
chr1	133240983	133244981
chr7	106976289	106977391
chr7	106993479	106995269
chr10	41011804	41015124
chr10	41022200	41024036
chr10	41169318	41170683
chr7	90288260	90289870
chr1	99870834	99875411
chr7	90779604	90781407
chr1	99878549	99879706
chr7	107006933	107007986
chr1	133327897	133329747
chr1	133374624	133376187
chr7	107127328	107129724
chr7	107269291	107270686
chr18	36507826	36509071
chr18	36520216	36521668
chr18	36535753	36539652
chr6	125165055	125166246
chr6	125180743	125182604
chr1	99975867	99977109
chr1	99991155	99992602
chr7	90962171	90962979
chr1	106713621	106715094
chr6	118856602	118858230
chr18	36573733	36578006
chr6	125221159	125222521
chr18	36580285	36581721
chr6	125262819	125264559
chr6	125280646	125281155
chr6	125298464	125306408
chr6	118870801	118873375
chr6	118884025	118887386
chr10	41193722	41197559
chr10	41208896	41210692
chr10	41238270	41241113
chr10	41547762	41552991
chr10	57825701	57827914
chr10	57832322	57834789
chr10	57844689	57847707
chr10	57908232	57910492
chr10	57960034	57961116
chr19	45001907	45006826
chr19	45080073	45082545
chr19	45087365	45096303
chr19	37205178	37210124
chr1	107012609	107015537
chr7	91031322	91033931
chr7	91039935	91041412
chr1	107252312	107253773
chr1	133420976	133425300
chr7	107307504	107308805
chr19	45121312	45124140
chr7	107375810	107376479
chr19	45131507	45133995
chr7	107502985	107504151
chr19	45149065	45150313
chr1	133683432	133684122
chr1	107559547	107560703
chr19	37231357	37239367
chr7	91274452	91278880
chr19	37246270	37253261
chr7	91298836	91301079
chr1	107802175	107805388
chr7	91752747	91755410
chr1	107842946	107844173
chr7	107519026	107521562
chr1	133693524	133694723
chr1	133698951	133700835
chr1	133723832	133726243
chr7	107607619	107612071
chr1	133735267	133736451
chr7	107612769	107616231
chr1	133737471	133740162
chr1	107867845	107869249
chr7	91836818	91838976
chr7	91927817	91928239
chr18	24278823	24280934
chr18	24351247	24352834
chr18	24363536	24365682
chr18	24628890	24629610
chr7	107619208	107624319
chr7	107641413	107645304
chr18	36613702	36614470
chr18	36667021	36670103
chr18	36673513	36676641
chr6	118889410	118890852
chr18	24687337	24689104
chr6	118899707	118901748
chr18	24761592	24762825
chr6	118905061	118906041
chr18	24810756	24813016
chr6	118912553	118914758
chr6	118948598	118951830
chr6	125441285	125445177
chr18	36718882	36721841
chr6	125522390	125524353
chr6	126045170	126047710
chr19	45438300	45439277
chr19	45488534	45489072
chr19	45515057	45516986
chr10	41605836	41611487
chr10	41612236	41614630
chr10	41619809	41623800
chr10	41650968	41658285
chr19	45653335	45655230
chr19	45665946	45666741
chr19	45733132	45735401
chr19	45856703	45858973
chr19	45889383	45891677
chr18	36824449	36827668
chr18	36828620	36830518
chr18	36837513	36839816
chr19	37266693	37267895
chr19	37280576	37284390
chr19	37365239	37367848
chr7	95425581	95427868
chr19	37387829	37392985
chr11	88464747	88467449
chr11	88473648	88477167
chr11	88479461	88486784
chr11	88487569	88488771
chr11	88495543	88497178
chr2	168552053	168554620
chr2	168559150	168560055
chr2	168566389	168567271
chr2	168590838	168592765
chr2	168780057	168781720
chr2	169457546	169460850
chr2	169488992	169490237
chr1	88365415	88370509
chr1	88383374	88385185
chr1	88399880	88402876
chr1	88421050	88426450
chr1	88451137	88452313
chr1	88453532	88456500
chr2	64965651	64967810
chr8	127850879	127853169
chr1	88478449	88480050
chr2	64976930	64980266
chr1	88483367	88483969
chr8	127864537	127867604
chr1	88599924	88600902
chr2	65026436	65028048
chr11	86939861	86941433
chr11	87028804	87031907
chr11	87059725	87063064
chr11	87112176	87114310
chr11	87122211	87123632
chr11	87126651	87128093
chr11	87216988	87218759
chr11	87235216	87238351
chr11	87239107	87241871
chr8	127908809	127915949
chr8	127953321	127956248
chr8	127967285	127970569
chr11	88497974	88501397
chr11	88511680	88512462
chr11	88513111	88519141
chr11	88520868	88524240
chr11	88550347	88555015
chr11	88576286	88582261
chr11	88589610	88591382
chr11	88626560	88627693
chr2	169547380	169550961
chr2	169954199	169960563
chr2	169972937	169974572
chr1	89109523	89111540
chr1	89223039	89224593
chr2	65073445	65077864
chr8	127984457	127987043
chr1	89652031	89653386
chr1	89709162	89710724
chr2	67283335	67286892
chr8	128030676	128033381
chr12	70297619	70299582
chr12	70328653	70329840
chr12	70342510	70344619
chr12	70397001	70398873
chr12	70457460	70458718
chr12	70462063	70463723
chr12	70464809	70465855
chr12	70471660	70475136
chr14	122195957	122197913
chr8	128036123	128043699
chr8	128044903	128047429
chr8	128051066	128059076
chr2	67465389	67467086
chr14	122223496	122225738
chr14	122276962	122278771
chr14	122473315	122475914
chr14	122503731	122507886
chr4	120497248	120499220
chr14	122509050	122510862
chr4	120597188	120598459
chr14	122580937	122582003
chr14	122932783	122933934
chr8	128062056	128064843
chr8	128068795	128071723
chr2	68059589	68062558
chr8	128079735	128085425
chr2	169977240	169980806
chr2	169999720	170000884
chr2	170010279	170010837
chr2	170030538	170032254
chr2	170033675	170037001
chr4	120623369	120625111
chr4	120688554	120690366
chr4	120770217	120771093
chr4	120886964	120888121
chr4	122516715	122517701
chr4	122555178	122556365
chr13	53023735	53025526
chr16	31273679	31279055
chr16	31290206	31292350
chr11	117828160	117831713
chr11	117847729	117849107
chr11	117859638	117862613
chr11	117869030	117871835
chr10	3130494	3140056
chr2	170336682	170337675
chr8	13623919	13625812
chr2	170557445	170558290
chr10	3186763	3188262
chr2	170676629	170678628
chr8	13643557	13645212
chr8	13647634	13649565
chr1	89748809	89751853
chr8	13664286	13666877
chr10	3219256	3220999
chr7	57459934	57461337
chr1	89774358	89778376
chr13	53068363	53078343
chr3	110052652	110054889
chr13	53096671	53099162
chr3	113332467	113333912
chr13	53102486	53105355
chr3	115322074	115326107
chr3	115337895	115338873
chr9	100933946	100935951
chr13	53128047	53130329
chr11	118005560	118008170
chr11	118012208	118013313
chr11	118066128	118067417
chr11	118068114	118074578
chr11	118075396	118079427
chr11	118081078	118083944
chr7	59116711	59118018
chr1	89796333	89800068
chr7	59167541	59169919
chr2	68210034	68210885
chr7	59260740	59262138
chr7	63096775	63099136
chr8	128092132	128094651
chr2	68211891	68218824
chr7	63217147	63218521
chr7	63274388	63275280
chr8	128188268	128191402
chr8	128193219	128194271
chr10	122236020	122237948
chr1	89903943	89905395
chr10	122266089	122268066
chr2	68249099	68255690
chr10	122279124	122280755
chr8	128257607	128258559
chr13	53162002	53165279
chr9	100977235	100979448
chr13	53472336	53473149
chr12	70523572	70526891
chr11	118093377	118102573
chr9	58465958	58467991
chr9	58694863	58696057
chr9	58737392	58740752
chr9	58883130	58885392
chr9	58909553	58911098
chr10	122281529	122283556
chr10	122323417	122325294
chr10	122329975	122333763
chr10	4521595	4523254
chr10	4539849	4540900
chr8	13757171	13758402
chr12	70562578	70564008
chr12	70574722	70578399
chr12	70585889	70587437
chr12	70597944	70598681
chr12	70601663	70605014
chr14	123311585	123312685
chr14	123381522	123383234
chr4	122557756	122560279
chr9	58918653	58920579
chr11	118107748	118111225
chr11	118126669	118128341
chr11	118150168	118152450
chr11	118215179	118217205
chr11	118222866	118225052
chr11	118260942	118264184
chr11	118279897	118280929
chr9	58981368	58982855
chr8	13785148	13786323
chr8	13869471	13870466
chr8	13907395	13908058
chr7	63305034	63306660
chr7	64566699	64568537
chr7	64611774	64613867
chr15	3177638	3179443
chr4	122560950	122564654
chr15	3219706	3221924
chr4	122816248	122818056
chr15	3281772	3284309
chr4	122878183	122879810
chr4	122909909	122911301
chr9	59118996	59120260
chr9	59138549	59140196
chr9	59199928	59201755
chr9	59236760	59237306
chr9	59331063	59336045
chr9	59386804	59388508
chr11	118299220	118301015
chr7	64954791	64959255
chr7	65653452	65655185
chr7	65881802	65882598
chr7	66095637	66100712
chr10	122426856	122429405
chr10	122497639	122498994
chr10	122508692	122509877
chr10	122627981	122628516
chr10	122633004	122634786
chr13	54040575	54041532
chr13	54167120	54168413
chr3	115411294	115419487
chr3	115460868	115462450
chr9	101097327	101103912
chr13	54271862	54274363
chr11	118337838	118338692
chr11	118917190	118920203
chr11	118945233	118948809
chr3	79045924	79049842
chr9	59398388	59401801
chr9	59464527	59465833
chr3	79067786	79070241
chr10	122950911	122952586
chr10	122955489	122959428
chr2	52293143	52294231
chr2	52355277	52356284
chr2	52478548	52480364
chr2	52600458	52601729
chr8	14887704	14890596
chr8	14904234	14908332
chr3	115464228	115466730
chr9	101152679	101154921
chr13	54397087	54399531
chr3	115467788	115472605
chr9	101163742	101164598
chr3	115474267	115476466
chr9	101228948	101233952
chr13	54666133	54667367
chr9	101240824	101241436
chr9	59519016	59522221
chr9	59597824	59600139
chr11	118985139	118990047
chr11	119075171	119078511
chr11	119088863	119089766
chr11	119128831	119130301
chr11	119160170	119162006
chr2	52838459	52839109
chr8	14910183	14912139
chr10	4824736	4826482
chr8	14916580	14918263
chr10	5056442	5059329
chr8	15055571	15064531
chr10	5274965	5279664
chr8	15076512	15078440
chr13	54675780	54677027
chr9	101301417	101302381
chr9	101315102	101316423
chr9	102164010	102165161
chr12	70615635	70617013
chr12	70637757	70640454
chr12	70674842	70676147
chr12	70775369	70776717
chr11	119216032	119218232
chr11	119250767	119255137
chr3	79085696	79088176
chr3	79088208	79092534
chr3	79276436	79281234
chr3	79297875	79298876
chr3	79318429	79325609
chr9	60107079	60108097
chr3	79328853	79329979
chr9	60156182	60159891
chr10	5913495	5915816
chr19	9096719	9098744
chr19	9144189	9151635
chr7	66483084	66485243
chr19	9209657	9210644
chr7	71002902	71004544
chr3	79339151	79342373
chr9	60463536	60464997
chr9	60535221	60535906
chr9	60590404	60591518
chr11	119352268	119353271
chr11	119463735	119465057
chr11	119524399	119528768
chr11	119544731	119545845
chr7	71024228	71025479
chr7	71029093	71034877
chr10	123031746	123032775
chr10	124778443	124783814
chr10	124825165	124826666
chr10	125402767	125403872
chr10	126342539	126343075
chr10	126362683	126369329
chr11	119566828	119567929
chr11	119580920	119582890
chr11	119626657	119628048
chr11	119774446	119775629
chr3	79362675	79364355
chr3	79370849	79372914
chr3	79394930	79396043
chr3	79431059	79433737
chr9	60607150	60607917
chr3	79493019	79495709
chr10	126372480	126373717
chr10	126377610	126378454
chr2	53049587	53051897
chr2	55286665	55289796
chr2	55331247	55333280
chr8	15151051	15152932
chr2	56965939	56970462
chr8	18594639	18595743
chr13	25869262	25870511
chr14	47521082	47523125
chr14	47533764	47535802
chr14	47542338	47544723
chr14	47559654	47562876
chr14	47569498	47571154
chr14	47574932	47576470
chr14	47583939	47588589
chr14	47596389	47602338
chr13	49436179	49444813
chr13	49450539	49454570
chr9	97039464	97048181
chr9	98998293	99000597
chr13	52069712	52072326
chr6	140430776	140433191
chr6	140467016	140468522
chr18	43519319	43520984
chr18	43552155	43555436
chr6	140571132	140573625
chr10	67594376	67601082
chr10	67627852	67632140
chr13	28720895	28722568
chr13	28848592	28851153
chr13	28945454	28946781
chr13	29025010	29026475
chr14	47603257	47605275
chr14	47610970	47613334
chr14	47629629	47633336
chr4	120486502	120490849
chr9	100542031	100546195
chr3	115341106	115351223
chr4	122914235	122916801
chr4	123074336	123079798
chr9	102399345	102402329
chr3	116126038	116128223
chr10	67654461	67656751
chr10	67665906	67666834
chr10	67711703	67712593
chr10	67737260	67746157
chr1	140491180	140494035
chr1	140503233	140506087
chr14	47684419	47685890
chr14	47694462	47695832
chr13	29042118	29046053
chr13	29049871	29051762
chr13	29281611	29285595
chr13	29288524	29289359
chr13	29290079	29295411
chr13	29301677	29303310
chr1	185887617	185888968
chr7	150323868	150326935
chr1	185994279	185997602
chr9	102619153	102634533
chr3	116643371	116649536
chr3	121041077	121043617
chr7	150617887	150619807
chr3	121128070	121134065
chr7	150734030	150735825
chr7	150773271	150775026
chr19	56750159	56755372
chr7	119368515	119375610
chr11	54747935	54753727
chr8	74853223	74861549
chr7	119419849	119424640
chr10	93103417	93105281
chr10	93123526	93125785
chr2	29643297	29643970
chr1	140513953	140517605
chr2	29675653	29676454
chr1	140753192	140753502
chr7	140984343	140986407
chr2	29681998	29683398
chr7	141861976	141863467
chr18	43596025	43598469
chr18	44470308	44473035
chr18	44473656	44478826
chr6	141197695	141202139
chr6	141204093	141207084
chr13	29641333	29642901
chr13	29718792	29721269
chr14	47705628	47710282
chr14	47715299	47717247
chr14	47896116	47897168
chr14	47917493	47919124
chr14	48064346	48066126
chr14	48092185	48093114
chr1	186498550	186500588
chr7	150785312	150785962
chr7	35861521	35862452
chr7	35865648	35867150
chr7	35902852	35905105
chr11	54885868	54892156
chr7	36019502	36020763
chr7	36118602	36120272
chr8	75021316	75029121
chr7	36339395	36341501
chr7	119797546	119807673
chr2	119945528	119963250
chr2	119964071	119970206
chr7	141864854	141866384
chr2	29744641	29746259
chr2	29790490	29791396
chr7	142787808	142791000
chr7	142792969	142798618
chr18	44539508	44540773
chr7	142993786	142995643
chr6	141254608	141257814
chr10	93134977	93136566
chr6	141258638	141260003
chr10	93140885	93143015
chr10	67781353	67783020
chr10	67909121	67909706
chr10	68003863	68005221
chr13	29722268	29724653
chr13	29728345	29731311
chr13	29740803	29742371
chr13	29946922	29948153
chr13	30065044	30066219
chr13	30075430	30079123
chr13	30326419	30328140
chr13	30428305	30431540
chr7	36431908	36432396
chr7	36587362	36587997
chr7	37481438	37483821
chr10	99622486	99623882
chr19	57224723	57250313
chr7	119894945	119909524
chr19	57251109	57288206
chr1	186553572	186559945
chr2	119972366	119980992
chr7	150799372	150801489
chr8	79568424	79572441
chr19	57295816	57298771
chr7	119998669	120000399
chr8	79574981	79576978
chr19	57310203	57322019
chr8	79644458	79646512
chr10	93169954	93171061
chr10	93351857	93353068
chr10	93381189	93382564
chr10	93498182	93499431
chr10	68304837	68305564
chr10	93510030	93511349
chr2	29799190	29801566
chr10	68634787	68636868
chr2	29904091	29904909
chr10	68674379	68677384
chr10	68680275	68685322
chr1	140825085	140826822
chr1	140859375	140861081
chr1	140862390	140864891
chr14	48187635	48188672
chr14	48251145	48255565
chr14	48267909	48271465
chr14	48366025	48368614
chr14	48693093	48694014
chr14	48740115	48741815
chr14	48750264	48755065
chr13	30451828	30453452
chr13	30634704	30638281
chr1	186571847	186573942
chr7	150924675	150926569
chr1	186668376	186670458
chr1	186675159	186678261
chr7	150968489	150972935
chr7	151008196	151009584
chr1	186687110	186689312
chr10	75807161	75809384
chr7	151015195	151016442
chr19	57432331	57438382
chr8	80013445	80021294
chr7	151654638	151657436
chr19	58890729	58898927
chr2	121273431	121280333
chr19	61010073	61012453
chr19	61013315	61019046
chr6	90643608	90659154
chr6	90678839	90682315
chr2	29917413	29919615
chr2	29921290	29923074
chr2	29933209	29934953
chr7	143687407	143688378
chr1	140866394	140867133
chr2	29948300	29950107
chr2	29978875	29980814
chr1	141318183	141319499
chr1	145371084	145372869
chr6	141284237	141285707
chr18	44820857	44822934
chr13	30751309	30752805
chr13	31037377	31038717
chr13	31064818	31066336
chr13	31076664	31078805
chr13	31897968	31900728
chr5	24044736	24047572
chr5	24082846	24084190
chr5	24106206	24111586
chr7	151674418	151676458
chr7	151712225	151714697
chr1	187026991	187028545
chr7	151723063	151726338
chr5	122942456	122954023
chr5	122966290	122981553
chr7	37742647	37743794
chr6	91733435	91746597
chr5	123871442	123875904
chr7	38347588	38348922
chr17	86898348	86901219
chr6	92824216	92827359
chr16	94789080	94796589
chr5	124103415	124106066
chr16	94821276	94824330
chr7	144085446	144086823
chr10	93578332	93579184
chr10	93610001	93611830
chr10	93661344	93662249
chr18	44987586	44988951
chr6	141329247	141331352
chr10	93894071	93896979
chr2	29988128	29990559
chr18	45431518	45433977
chr6	141372477	141374163
chr10	68685984	68689494
chr5	24190435	24193489
chr5	24255763	24258158
chr4	93001266	93002502
chr4	94141466	94144754
chr4	94223029	94223792
chr14	49065730	49066513
chr4	94269013	94270683
chr4	94280567	94281841
chr7	38484463	38485318
chr7	38512502	38513348
chr7	38556646	38558745
chr5	124107312	124126874
chr10	105009918	105012750
chr5	124427767	124431845
chr10	105278118	105278964
chr5	124461079	124466861
chr10	106559995	106561447
chr5	124618529	124625509
chr10	106935967	106937569
chr17	87843668	87848768
chr16	95922986	95928728
chr12	71553465	71557183
chr12	71748397	71759320
chr12	71925442	71932755
chr2	30026451	30027807
chr2	30032948	30034345
chr2	30055497	30056625
chr2	30060259	30062244
chr7	144312488	144313752
chr7	144469395	144470394
chr10	68732820	68742958
chr1	145389353	145391286
chr7	144489432	144493619
chr1	145423203	145425667
chr2	30112743	30126147
chr1	145487453	145489831
chr7	144500774	144507195
chr1	145548806	145550484
chr1	145586401	145587495
chr1	145623582	145625316
chr1	145850773	145852550
chr14	49209481	49210501
chr4	94405570	94407235
chr4	94408018	94409908
chr14	49685229	49686734
chr4	94411168	94415217
chr14	49790734	49792827
chr13	31902289	31903411
chr13	31912108	31913250
chr13	32429835	32431399
chr10	107342144	107343924
chr10	107365963	107370194
chr2	32441997	32446290
chr2	32462196	32466794
chr2	32475526	32477987
chr2	32479629	32490693
chr13	56213983	56221177
chr2	32491872	32494851
chr12	71967402	71970101
chr12	72931223	72943403
chr12	72949023	72951243
chr1	187152230	187153733
chr12	72953616	72958097
chr9	106349473	106353324
chr4	125911437	125940196
chr7	144601806	144603755
chr7	144628733	144630293
chr7	146036712	146040270
chr7	146097406	146102166
chr7	146109982	146112198
chr1	145864561	145867305
chr2	30211893	30215196
chr2	30219242	30222139
chr18	45717895	45718925
chr18	45788197	45789226
chr6	142294016	142294660
chr6	142335383	142336201
chr18	46439378	46440915
chr13	32570268	32572400
chr13	32751247	32753407
chr13	32771732	32773138
chr5	24346301	24349658
chr5	24366014	24367794
chr5	24413424	24415357
chr5	24477535	24480072
chr5	24485132	24492269
chr1	187155456	187157035
chr1	187186173	187188460
chr7	151754581	151756684
chr2	32508192	32513054
chr1	187940534	187941288
chr12	73068810	73085804
chr12	73095349	73100546
chr1	188404165	188406396
chr15	12475259	12480728
chr7	152100360	152101319
chr7	152123619	152126186
chr15	12580696	12585047
chr4	126933934	126937010
chr3	121993522	121997761
chr3	122212301	122215203
chr9	107489687	107501083
chr13	63367027	63388805
chr2	30246570	30249744
chr2	30264219	30266919
chr2	30269661	30272532
chr2	30295121	30304328
chr2	30318533	30320672
chr6	142454017	142458109
chr2	30325254	30329689
chr18	46584240	46587061
chr18	46642795	46644852
chr18	46653550	46654173
chr18	46682172	46686342
chr18	46756357	46758500
chr19	4045737	4046672
chr19	4096378	4098056
chr19	4098650	4100470
chr19	4112970	4114192
chr19	4120998	4122023
chr7	38802962	38804823
chr19	4125269	4126857
chr19	4147734	4149624
chr7	38996605	38998706
chr2	30395851	30398133
chr2	30401908	30407255
chr2	30448971	30451467
chr2	30455183	30458048
chr5	139695861	139696683
chr5	139727496	139729817
chr5	139731000	139732384
chr5	139813362	139817494
chr5	139818139	139822308
chr5	139839679	139842003
chr19	4151058	4153922
chr7	39002089	39003510
chr19	4162616	4163665
chr7	39009161	39013952
chr7	39055946	39056724
chr7	46704200	46705402
chr7	46772473	46773845
chr10	107525454	107527242
chr10	107609970	107610703
chr5	139845905	139849399
chr5	139850938	139870043
chr5	139873231	139875169
chr5	139959813	139961055
chr5	140256503	140259591
chr18	36893366	36895737
chr18	36903290	36905110
chr18	36919252	36920248
chr18	36942075	36943456
chr18	36960706	36962236
chr18	37803053	37804601
chr19	45898737	45903075
chr19	45909283	45912799
chr19	45928536	45933363
chr7	96351863	96353319
chr19	37397982	37398577
chr19	37449851	37451170
chr7	96485420	96487845
chr19	37508578	37510011
chr1	108067344	108070512
chr19	45937548	45939619
chr19	45973361	45978740
chr19	46072097	46073462
chr19	46077473	46078641
chr19	46113213	46121486
chr19	46130563	46132450
chr19	46149650	46151296
chr18	37814920	37816034
chr18	37849495	37850213
chr1	108117090	108118285
chr18	24907365	24912943
chr6	118975217	118978067
chr18	24914576	24918426
chr6	118989763	118996477
chr18	24942317	24948244
chr18	37890646	37891513
chr13	109082473	109084344
chr10	41709437	41712453
chr10	41918058	41921182
chr10	41923635	41926108
chr10	41926340	41928702
chr10	41944746	41946199
chr13	109288113	109289344
chr13	110037759	110039068
chr13	110230475	110231967
chr13	110475456	110477430
chr13	110611713	110614152
chr13	110692166	110695559
chr13	110703963	110709124
chr13	110775443	110776259
chr13	111184276	111187221
chr19	37624893	37626390
chr19	37634448	37637055
chr7	96780794	96782950
chr7	96785799	96787859
chr7	96848499	96849576
chr13	111187931	111190743
chr13	111327650	111329542
chr13	111347519	111349677
chr13	111352213	111354691
chr13	111432806	111434418
chr7	97089079	97089689
chr1	108525431	108528112
chr7	97128201	97130210
chr1	108610245	108611522
chr13	111485929	111487823
chr13	111731654	111732777
chr13	111887525	111889936
chr13	112278721	112281190
chr13	112475884	112478052
chr13	112514747	112516448
chr13	112578078	112580222
chr18	24974282	24978880
chr6	119014420	119016232
chr6	119025824	119029751
chr6	119031285	119037129
chr6	119037529	119040191
chr10	41946845	41952471
chr10	41957540	41958901
chr13	112586042	112589306
chr13	112595394	112596394
chr13	112597155	112600513
chr13	112658036	112658556
chr5	111961380	111962420
chr5	111964363	111965594
chr5	112049112	112052187
chr5	112153777	112156158
chr5	112446747	112450905
chr10	41981290	41982631
chr19	38341738	38342854
chr19	38555025	38556770
chr1	108655232	108657321
chr19	38572192	38573328
chr1	108692557	108693818
chr19	38643841	38644596
chr4	140865536	140867833
chr4	140871467	140873439
chr4	140880140	140882992
chr4	140975510	140985465
chr4	141000046	141000818
chr4	141056190	141058144
chr13	112743503	112746842
chr7	97176473	97182791
chr19	38684064	38686470
chr1	109813330	109815485
chr1	113760859	113762157
chr7	97272765	97275051
chr7	97275904	97281421
chr1	120207377	120208754
chr13	112769080	112769961
chr13	112873900	112876725
chr13	112890438	112891575
chr13	112905120	112908250
chr13	112908622	112911520
chr1	120218103	120218916
chr18	25036143	25038606
chr18	25128845	25131230
chr6	119077796	119085046
chr18	25197273	25199013
chr18	25318710	25319495
chr5	112753748	112755654
chr5	112771595	112772762
chr5	113199826	113201299
chr5	113308133	113309949
chr4	141061628	141063591
chr4	141099580	141104223
chr4	141113591	141116513
chr4	141120457	141122422
chr4	141125019	141128387
chr6	119149643	119152524
chr6	119337229	119339342
chr10	41993373	41998749
chr10	42174845	42179511
chr10	42182057	42185458
chr10	42195957	42199616
chr10	42220498	42223984
chr10	42398783	42399409
chr10	42480533	42482798
chr2	68268199	68271912
chr8	128945853	128947333
chr8	128998120	128999300
chr2	68294328	68296511
chr8	129021224	129022998
chr2	68303428	68307820
chr8	129037051	129039529
chr2	68308725	68311004
chr8	129040211	129043998
chr2	68699199	68701055
chr8	129046838	129053526
chr2	172170337	172171710
chr2	172195871	172196884
chr2	172298456	172299229
chr2	172301641	172303532
chr2	172825033	172826407
chr2	172843485	172845759
chr1	90173726	90174891
chr1	90550448	90553058
chr1	90553554	90557091
chr1	90596959	90599497
chr1	90937727	90939846
chr1	90965916	90970488
chr2	68772616	68773383
chr1	90988145	90992149
chr8	129065438	129068061
chr1	90998990	91001768
chr2	69059857	69060506
chr8	129071135	129073179
chr8	129074092	129076128
chr2	69506184	69512517
chr2	69551029	69551556
chr2	69560294	69562236
chr2	69627151	69628589
chr2	69659656	69661515
chr1	91027040	91030550
chr1	91031385	91033878
chr1	91079003	91081289
chr1	91350684	91352500
chr1	91429687	91431974
chr1	91454348	91455677
chr1	91487536	91488345
chr1	91491046	91493420
chr1	91508281	91510961
chr1	91540118	91541455
chr1	91756691	91757597
chr1	91891616	91900469
chr1	91910106	91912283
chr12	70781038	70785169
chr12	70824936	70826838
chr12	70857563	70860038
chr12	70964331	70966367
chr15	3380954	3388687
chr15	3405571	3408801
chr1	91913923	91915435
chr1	92133501	92137848
chr1	92151763	92156081
chr1	92254697	92257183
chr1	92385633	92392002
chr1	92392772	92394709
chr1	92499528	92500440
chr1	92629802	92631260
chr1	92734544	92735742
chr4	122923263	122927401
chr15	3457356	3461552
chr4	122959939	122963748
chr15	3530162	3533526
chr15	3911464	3913708
chr15	3928824	3930413
chr3	115482075	115484734
chr1	92902710	92904361
chr1	92904520	92915897
chr1	92918389	92922631
chr1	154613776	154614708
chr1	154664649	154665854
chr1	154748602	154752221
chr1	154911478	154913614
chr13	54686921	54687731
chr3	115495751	115496948
chr13	54691028	54692662
chr13	54704954	54708087
chr3	115516689	115519729
chr13	54709928	54713640
chr3	115521340	115524167
chr9	102395319	102395985
chr13	54722639	54724032
chr9	60641558	60643112
chr3	79587594	79588964
chr9	60660842	60662100
chr3	79628140	79630575
chr11	119809510	119810552
chr11	119874636	119875166
chr11	119900538	119904277
chr11	119907486	119908471
chr11	119959566	119960831
chr10	5955552	5960649
chr2	56975720	56977043
chr10	6010373	6012859
chr6	148448039	148449907
chr8	18678350	18681003
chr6	148779241	148780472
chr2	57089948	57091485
chr6	148843717	148845202
chr8	18723788	18727799
chr6	149041582	149044242
chr10	6193436	6195384
chr6	31126136	31128658
chr3	115589776	115591518
chr13	54786915	54790356
chr13	54794380	54796461
chr3	115655930	115657384
chr9	102402962	102403727
chr3	115708993	115711967
chr9	102406390	102409565
chr13	55200469	55202040
chr9	102413223	102414837
chr11	120002889	120006523
chr3	79645601	79647401
chr3	79688376	79691198
chr3	79691861	79692960
chr9	60711837	60714612
chr9	60879036	60880592
chr3	79731958	79733307
chr6	31140509	31144239
chr8	18845854	18847164
chr10	6232930	6235457
chr1	154975849	154979115
chr10	6237780	6240827
chr1	154980572	154982098
chr8	18901534	18903603
chr10	6264823	6267724
chr1	155126879	155128861
chr1	155132341	155135277
chr19	9973015	9974960
chr1	155138403	155142141
chr19	10028767	10029733
chr1	155147272	155148820
chr9	102419785	102421664
chr9	102527753	102529654
chr9	102616881	102618326
chr12	70992700	70996324
chr12	71077891	71078941
chr12	71086216	71089000
chr12	71211610	71213321
chr12	71328137	71329204
chr15	3943586	3947258
chr15	3970381	3971913
chr9	61184490	61186436
chr9	61218547	61221600
chr9	61492997	61495046
chr9	61502702	61504675
chr9	61737287	61738565
chr1	23404311	23404990
chr11	120011722	120013568
chr19	10052530	10054237
chr7	71066312	71075683
chr19	10055852	10059323
chr7	71078410	71085332
chr7	71209332	71211131
chr19	10112942	10114380
chr7	71432072	71433082
chr7	71536372	71538175
chr15	3974019	3979330
chr15	3980676	3984699
chr15	4013083	4014408
chr4	123087443	123091744
chr4	123102441	123106570
chr15	5057638	5058935
chr11	120025169	120028628
chr1	23928265	23929706
chr1	24011982	24012722
chr11	120044714	120052190
chr1	24106275	24107697
chr11	120067539	120069008
chr1	24684240	24686593
chr1	30929484	30931859
chr10	126386969	126388732
chr10	126408842	126409838
chr10	126414973	126429566
chr10	126467349	126467899
chr10	126500082	126501723
chr10	126506317	126508000
chr10	126625828	126628106
chr2	58338610	58343546
chr4	123115028	123117472
chr15	5065103	5067809
chr3	116086795	116088213
chr3	116210282	116211559
chr3	116215517	116217295
chr1	31003600	31008388
chr11	120094648	120104423
chr9	61761752	61763102
chr9	61794944	61795937
chr2	58360930	58362744
chr2	58384891	58388258
chr8	18916705	18918647
chr2	58416990	58421023
chr10	6372474	6373716
chr2	58997845	59000254
chr8	19784526	19785068
chr9	102678711	102682547
chr3	116223087	116223872
chr9	102736730	102739124
chr3	116265098	116267897
chr9	103206990	103207869
chr9	103265685	103269708
chr9	103331386	103336983
chr15	5093278	5094444
chr3	79787587	79788917
chr9	61969913	61971213
chr3	79792051	79795622
chr9	62188175	62195949
chr1	31070938	31073271
chr1	31073901	31077687
chr2	59027452	59029501
chr8	19892521	19892999
chr2	59044387	59046556
chr8	20019748	20020324
chr8	23170246	23171485
chr8	23246363	23247510
chr10	6467587	6468863
chr15	5108275	5109814
chr15	5134897	5136750
chr4	123239513	123243846
chr1	31158459	31160361
chr1	33390264	33391771
chr11	120122718	120123751
chr11	120165822	120167483
chr11	120176905	120178469
chr1	33726133	33727486
chr10	6510034	6515578
chr8	23302906	23304375
chr19	10115454	10119640
chr19	10120165	10121779
chr19	10222743	10223775
chr4	123248346	123250888
chr15	6657351	6659240
chr4	123265119	123267244
chr4	123269644	123272376
chr4	123294119	123296598
chr4	123300762	123304439
chr4	123309992	123313713
chr3	116297319	116298468
chr3	116340552	116343242
chr11	120205066	120207087
chr11	120207769	120216959
chr11	120220259	120221756
chr11	120239249	120240598
chr3	81736172	81737434
chr7	72017333	72018382
chr19	10278059	10280456
chr7	72035020	72036504
chr19	10282309	10285764
chr19	10287470	10289721
chr7	72502553	72506693
chr19	10368988	10372259
chr3	81877758	81878551
chr3	82161590	82162509
chr9	62208313	62212248
chr3	82858995	82859986
chr9	62212602	62216228
chr9	62219425	62223444
chr9	62227950	62230431
chr9	62267620	62270150
chr10	126631397	126636722
chr10	126646720	126649157
chr10	126703091	126706425
chr10	126724289	126734978
chr10	126748138	126750347
chr10	126776045	126776970
chr10	126790660	126792807
chr10	126817023	126819038
chr1	33807472	33810155
chr1	33812094	33815000
chr1	33870406	33871384
chr1	34061141	34063903
chr1	34084414	34089180
chr3	83666211	83669715
chr3	83773299	83775901
chr3	83779698	83783963
chr10	126857386	126859886
chr2	59071373	59072861
chr2	59122485	59125279
chr10	6604411	6606404
chr2	59263014	59264744
chr10	6627238	6628855
chr5	24500593	24502470
chr5	24604062	24607089
chr5	24728353	24729508
chr4	94645459	94646479
chr4	94714786	94721318
chr14	51426528	51428089
chr4	94747753	94750316
chr14	51489683	51491033
chr14	51515196	51517855
chr15	13213888	13215794
chr13	63402441	63407860
chr3	122719720	122724769
chr3	122725497	122739102
chr9	107596671	107602665
chr9	107671234	107673950
chr12	74500267	74512500
chr15	25551187	25556080
chr3	122788387	122797257
chr18	46774583	46775622
chr18	46900366	46902945
chr18	47079658	47081512
chr14	15534900	15536201
chr14	15664280	15665684
chr14	16204608	16206660
chr14	51543486	51545299
chr14	51549816	51551567
chr4	94825380	94829782
chr14	51563501	51565226
chr13	32865899	32870990
chr13	32885951	32887674
chr13	32893181	32896169
chr3	122830945	122836218
chr3	122847992	122857635
chr3	122860111	122866452
chr15	25869111	25892211
chr15	25893001	25896987
chr9	108114634	108117199
chr3	122936164	122940348
chr9	108120341	108126888
chr15	27395316	27408437
chr15	27415066	27418338
chr14	16242755	16244133
chr14	16264335	16265814
chr14	17075377	17077201
chr14	17080965	17082919
chr14	17149367	17150175
chr14	17160619	17161695
chr14	17196240	17199741
chr14	17264575	17268383
chr13	33003844	33005676
chr13	33013496	33017585
chr13	33018217	33020684
chr15	96601920	96605459
chr15	96608929	96610305
chr15	96620599	96622827
chr15	96624386	96624842
chr5	25002714	25006278
chr5	25031911	25033610
chr10	107628451	107628855
chr10	107882825	107883219
chr2	32513191	32518129
chr2	32520478	32521946
chr2	32523186	32524164
chr15	27420597	27428469
chr2	32548549	32550355
chr3	123024651	123034031
chr2	32567248	32571207
chr3	123053250	123059763
chr7	152126990	152129679
chr15	27462249	27472554
chr2	32583204	32588376
chr15	27498172	27509131
chr4	129843770	129855325
chr3	126311982	126316339
chr15	27512535	27516948
chr15	27541813	27556273
chr17	23907536	23908613
chr17	23927036	23927748
chr17	23939288	23942250
chr14	17314975	17318002
chr17	23965120	23966521
chr5	140531236	140533211
chr14	17328761	17331786
chr17	24061360	24062856
chr5	140590448	140593091
chr14	17336677	17339040
chr14	17341622	17343591
chr17	24209852	24210396
chr14	17385686	17388169
chr14	17388825	17392609
chr14	17403705	17408681
chr14	17430558	17431871
chr14	18464612	18466002
chr15	96741728	96743956
chr5	25034566	25036666
chr15	96745476	96747681
chr5	25144645	25145523
chr15	96798910	96800344
chr5	25158183	25160629
chr5	25211074	25212222
chr5	25225176	25226318
chr5	25253416	25254973
chr14	68333461	68335631
chr7	152185520	152187041
chr7	152210504	152212092
chr2	32612335	32613421
chr7	152296097	152299552
chr2	32630449	32631570
chr15	27556887	27561010
chr7	152391796	152393044
chr11	58810600	58817431
chr1	188572978	188573676
chr1	189038990	189040286
chr11	59029361	59032271
chr2	122200815	122204363
chr8	81905229	81907836
chr11	59772649	59779258
chr8	83331233	83347705
chr5	140610688	140612601
chr17	24245107	24247780
chr5	140692905	140694593
chr5	140797154	140798455
chr5	140864640	140865683
chr14	18491754	18495470
chr5	140894148	140895802
chr14	18506425	18508234
chr5	141047553	141049583
chr14	18575476	18577076
chr17	24277394	24279331
chr14	18860902	18862814
chr14	19057190	19059385
chr14	19065047	19073109
chr14	68550499	68552126
chr4	94948559	94952216
chr14	69076235	69079777
chr4	95044021	95045719
chr14	69613106	69614118
chr14	69706563	69707822
chr4	95303247	95305003
chr1	189049473	189051199
chr8	3184722	3190651
chr1	189432144	189434526
chr1	189472785	189478098
chr19	4168963	4176124
chr11	59926200	59931380
chr11	60032304	60037272
chr19	4190721	4192997
chr10	79162366	79171024
chr19	4201273	4202044
chr8	83357230	83365491
chr19	4230839	4233012
chr7	46799387	46800666
chr8	83374329	83379489
chr8	83388786	83393953
chr7	127993651	127997962
chr7	128181726	128190718
chr7	129185673	129192839
chr10	79576490	79583408
chr17	24304434	24307458
chr17	24328714	24329465
chr17	24356986	24358402
chr5	141124018	141124922
chr14	19102954	19104499
chr14	19119212	19120767
chr17	24487857	24490169
chr5	141177572	141178919
chr14	19159264	19160535
chr14	19163313	19164629
chr17	24550545	24552455
chr5	141180061	141181682
chr14	19229840	19232041
chr14	19725608	19726857
chr4	148909867	148910318
chr4	148911036	148914095
chr4	148944419	148947537
chr4	95406638	95410234
chr14	51626763	51629465
chr14	51682516	51685771
chr4	95633476	95634522
chr14	51702301	51704377
chr4	96219755	96221086
chr14	51707172	51711206
chr4	96257415	96258753
chr19	4257523	4258346
chr7	46807372	46808820
chr19	4294036	4295635
chr7	46935455	46936290
chr7	47513122	47514559
chr10	79603200	79625462
chr19	4298920	4300759
chr7	48648181	48649449
chr7	130266962	130269992
chr5	124633908	124666481
chr7	48754309	48755637
chr5	124667259	124677098
chr7	48854291	48855624
chr6	97171322	97175251
chr7	48887375	48889450
chr17	88995890	88999412
chr17	89025025	89029952
chr16	96429093	96435186
chr6	98942247	98948757
chr18	4651813	4656215
chr17	24591013	24593022
chr17	24606626	24609809
chr17	24615348	24616322
chr4	149104766	149109240
chr5	141251758	141254061
chr4	149109967	149112161
chr5	141255427	141259653
chr4	149131978	149134483
chr17	24664229	24665859
chr5	141260829	141262290
chr14	20642514	20643725
chr17	24685384	24688185
chr14	20706253	20706901
chr14	20901049	20903073
chr14	21113508	21114489
chr14	21116675	21118588
chr14	21166767	21168255
chr13	33049440	33052535
chr13	33056516	33058931
chr13	33095115	33097687
chr13	34026686	34028381
chr13	34055974	34058146
chr13	34093866	34095319
chr15	96833289	96835286
chr15	96966002	96967031
chr7	49760633	49761363
chr7	49947824	49948953
chr10	109421663	109424875
chr5	125652837	125661353
chr10	110356008	110357906
chr18	4992798	5033806
chr10	110364143	110365324
chr17	5115163	5118748
chr10	110366422	110368118
chr10	110388267	110390878
chr17	5204432	5208019
chr5	125918391	125923696
chr17	5992609	6008738
chr5	130038480	130042413
chr6	108181981	108187149
chr17	6161446	6163734
chr5	141263922	141279032
chr17	24693951	24697941
chr5	141285626	141291862
chr5	141301493	141307115
chr5	141613542	141616022
chr17	24769356	24771308
chr14	21212184	21213353
chr17	24779040	24783451
chr5	142842751	142844473
chr14	21296224	21299925
chr4	149146290	149152340
chr17	24806019	24807638
chr4	149157310	149159952
chr5	142876858	142880238
chr4	149162445	149167121
chr4	149194309	149196351
chr4	149203792	149207330
chr4	149214592	149215938
chr4	149259999	149263063
chr15	96998601	97001888
chr5	25265308	25269408
chr15	97077296	97079473
chr5	28117071	28119260
chr5	28362559	28365781
chr15	97547858	97552439
chr5	28396301	28399204
chr5	28643024	28644310
chr5	29704599	29705957
chr10	110422972	110424683
chr2	32639689	32640314
chr2	32693627	32695209
chr2	32701386	32703270
chr1	189484545	189486763
chr5	130417078	130418900
chr1	189660030	189662062
chr2	32736295	32738922
chr12	74818723	74824347
chr2	32743447	32744782
chr3	126359188	126365423
chr3	126401767	126405106
chr15	27870903	27874438
chr15	27920798	27923452
chr17	24832277	24833952
chr5	142887967	142890489
chr17	24844043	24845233
chr5	142891781	142893769
chr5	142906864	142909139
chr4	149263624	149265837
chr14	21364270	21366361
chr5	142938954	142940561
chr14	21426230	21430152
chr14	21436997	21438583
chr17	24981420	24983199
chr5	143104707	143106120
chr14	21459623	21461223
chr14	21479147	21488821
chr14	21492557	21497569
chr14	21512865	21517872
chr14	21519639	21522784
chr14	21526223	21527599
chr5	29713120	29715900
chr14	69901804	69903829
chr14	69954712	69956336
chr14	70090649	70093825
chr14	51761602	51764355
chr14	70106933	70107362
chr14	70131819	70133462
chr4	97417515	97422744
chr14	70166931	70168196
chr8	3226481	3232925
chr1	189760815	189764186
chr2	32762190	32765000
chr1	189774845	189776371
chr3	127199079	127202554
chr12	77652932	77657106
chr3	130966800	130972818
chr8	3243068	3249381
chr9	110664491	110674449
chr1	189841757	189843047
chr9	110850703	110867021
chr15	36706808	36716445
chr4	132566613	132573495
chr3	135083569	135089392
chr3	135100032	135104830
chr9	111019939	111032966
chr17	24985593	24988256
chr17	25014370	25015902
chr17	25023118	25024834
chr5	143573766	143586014
chr17	25031541	25034088
chr5	143656545	143657512
chr15	77758299	77760443
chr17	25035342	25036506
chr5	143682112	143683774
chr5	143687431	143689799
chr15	77800293	77802070
chr5	143690529	143691778
chr4	149294882	149298528
chr15	78088141	78089295
chr4	149306083	149307372
chr4	149320595	149324314
chr4	97423373	97425703
chr14	51885183	51886480
chr14	70178390	70181226
chr14	52503507	52504964
chr14	70204102	70206644
chr4	97459405	97461811
chr14	52541168	52541833
chr1	189917449	189918876
chr19	4332579	4335402
chr19	4395430	4398910
chr19	4509528	4511734
chr19	4609540	4611501
chr4	132592714	132621083
chr19	4614716	4616652
chr4	132645169	132651879
chr19	4624664	4626269
chr7	50559527	50561748
chr15	36932011	36938692
chr11	60835791	60842322
chr19	4755813	4757281
chr7	132617730	132622687
chr8	87178742	87189368
chr11	61427531	61433943
chr8	87210474	87213620
chr17	25072558	25074275
chr17	25097057	25098144
chr17	25150373	25154224
chr17	25181270	25182763
chr5	143722093	143724224
chr4	149327347	149331238
chr17	25199934	25209210
chr4	149362527	149365413
chr17	25214535	25221934
chr4	149460627	149466368
chr17	25251858	25254116
chr4	149600590	149601869
chr14	21552955	21554833
chr14	21583762	21588337
chr14	21590087	21593760
chr10	110428485	110429778
chr10	110446259	110448432
chr10	110468485	110469123
chr10	110497957	110499156
chr10	110538541	110540848
chr2	32769510	32771352
chr5	143792422	143794257
chr5	143808573	143810013
chr5	143873959	143874672
chr17	25320456	25322156
chr17	25324423	25326169
chr2	32816932	32818408
chr2	32821404	32826317
chr2	32837053	32838094
chr2	32985522	32987204
chr1	191008622	191009654
chr2	33014780	33017024
chr2	33033022	33035130
chr8	3255350	3257351
chr5	143942070	143942805
chr5	143996866	143997871
chr17	25409076	25411619
chr5	144031468	144032074
chr17	25715616	25716928
chr5	144070181	144071224
chr17	25718730	25719712
chr5	144076128	144077043
chr5	144090516	144091430
chr4	141151757	141159210
chr13	112942304	112944205
chr13	112976642	112979943
chr13	112986484	112988375
chr13	113041698	113043802
chr13	113125294	113126551
chr13	113138403	113141060
chr13	113214925	113217017
chr19	38893247	38894129
chr19	38910566	38912258
chr19	40314138	40317218
chr19	40320950	40322345
chr19	40323211	40325074
chr1	120254532	120257167
chr7	97288919	97299688
chr19	40327692	40329578
chr1	120284578	120287253
chr5	113351901	113353115
chr15	68822384	68823772
chr15	68920765	68922925
chr15	69133065	69134524
chr19	40341720	40347014
chr19	40352163	40353661
chr19	40362788	40363676
chr1	120353012	120357431
chr7	97590636	97593315
chr15	72639762	72641730
chr4	141217530	141221261
chr13	113252959	113257891
chr13	113450264	113451537
chr13	113487529	113490344
chr13	113549654	113556605
chr13	113560557	113562553
chr1	120374207	120386150
chr7	97604689	97606498
chr1	120389009	120390012
chr7	97623948	97625703
chr18	25788498	25789343
chr18	26067459	26070016
chr18	31767517	31769864
chr6	119345295	119347093
chr18	31793426	31795286
chr16	45399252	45403817
chr16	45404611	45409435
chr16	45742562	45743530
chr16	45757862	45760269
chr5	113542842	113545548
chr16	45836890	45840286
chr6	119366522	119369661
chr18	31918735	31920697
chr6	119393270	119394261
chr6	119416826	119417904
chr18	31963411	31965076
chr6	119428135	119430780
chr18	32069398	32071885
chr6	119458167	119460274
chr6	119490409	119491680
chr16	45841733	45845145
chr5	113558972	113568804
chr16	45871001	45872268
chr5	113571068	113572084
chr5	113579885	113582836
chr15	72890991	72893526
chr6	119604350	119607259
chr10	42753985	42756605
chr10	42890459	42895416
chr10	42940352	42941841
chr10	43029745	43031660
chr10	43091147	43093550
chr15	72897460	72899291
chr15	72920109	72921845
chr15	72978052	72981218
chr4	141275083	141279988
chr15	72983543	72987715
chr4	141322355	141324507
chr4	141345906	141347354
chr4	141348402	141350365
chr10	43129415	43130351
chr19	40364350	40365621
chr19	40370818	40384469
chr7	99709188	99710457
chr7	99784760	99786462
chr4	141383184	141384481
chr4	141413569	141415335
chr13	113590665	113592597
chr13	113599182	113601828
chr13	113625179	113625748
chr13	113652144	113653416
chr13	113717055	113718748
chr13	114012678	114014629
chr7	99889063	99891409
chr1	120485871	120490338
chr1	121092840	121095356
chr7	99911968	99915411
chr1	121115638	121117127
chr18	32078885	32088234
chr6	119775800	119779182
chr16	45872819	45874057
chr16	46009988	46011164
chr16	46496054	46497989
chr16	48986365	48987632
chr16	48992677	48994308
chr16	49521255	49522556
chr5	113608492	113611206
chr5	113624588	113630524
chr6	119797066	119799724
chr18	32226760	32228376
chr6	119814219	119815155
chr18	32322017	32323641
chr6	119852216	119853472
chr18	32399147	32400472
chr6	119985917	119990305
chr15	73072332	73074562
chr15	73261322	73265008
chr4	141427186	141431365
chr4	141437359	141439570
chr15	73273224	73274798
chr4	141455683	141456024
chr15	73276227	73278504
chr15	73322485	73323897
chr6	120058452	120061042
chr10	43173916	43175100
chr10	43236815	43238273
chr10	43257129	43261183
chr10	43620870	43622565
chr10	43986982	43989035
chr1	121217616	121219570
chr7	100022730	100024855
chr4	141608175	141610741
chr4	141613224	141614191
chr13	114340738	114341974
chr13	114392739	114397100
chr13	114400960	114408764
chr13	114450620	114454233
chr13	114584082	114585695
chr13	114643965	114647375
chr13	114807598	114808514
chr1	121399890	121401939
chr7	100154816	100156472
chr1	121404615	121405731
chr1	121422104	121423287
chr1	121544340	121545914
chr1	155150143	155152285
chr1	155154503	155157334
chr6	149048913	149050858
chr6	149089692	149091420
chr6	149122366	149124626
chr6	149136573	149138078
chr6	149257139	149258645
chr7	3274815	3276424
chr6	31209268	31215585
chr6	31229762	31235197
chr6	31263616	31265115
chr6	31319371	31323365
chr6	31339857	31341631
chr6	31348123	31350356
chr1	155164044	155165947
chr1	155177263	155181304
chr1	155333664	155335374
chr1	155577007	155578554
chr1	155595156	155597360
chr1	155598604	155599519
chr18	60787160	60788132
chr18	60790831	60793810
chr18	60794931	60801279
chr7	3279747	3281938
chr18	60807675	60812835
chr7	3288863	3295456
chr18	60827088	60830523
chr7	3301740	3302762
chr7	3559831	3561724
chr7	3568405	3569734
chr7	3580770	3582158
chr7	3596168	3597882
chr7	3616313	3617932
chr17	43063696	43065639
chr17	43388218	43390091
chr17	43390749	43392110
chr6	31467395	31470305
chr6	31492059	31497951
chr6	31507019	31515276
chr1	155755721	155759010
chr1	155760977	155761715
chr1	155764781	155771136
chr1	155949652	155951454
chr18	60868204	60870708
chr3	116364385	116366766
chr3	116414468	116416331
chr9	103622590	103624654
chr9	103817234	103818534
chr9	103904260	103905665
chr3	116507921	116511729
chr9	103965113	103966821
chr14	103748590	103749589
chr14	103867524	103869701
chr14	104242574	104244327
chr14	105009415	105010235
chr14	105575486	105576954
chr11	44514266	44516345
chr11	44519327	44521969
chr18	60882020	60883538
chr18	60886675	60890444
chr18	60891041	60897733
chr7	3644149	3646629
chr7	3655129	3656517
chr18	60917764	60919088
chr7	4087905	4089766
chr7	4099538	4103069
chr9	104164640	104165996
chr9	104900366	104901510
chr15	6810869	6813098
chr15	6820773	6822676
chr15	6823324	6825211
chr15	7078298	7081749
chr4	123340571	123343263
chr4	123394609	123396047
chr4	123426001	123428521
chr11	45621273	45621798
chr11	45665206	45667040
chr11	45712991	45715027
chr11	45768480	45769227
chr11	45868313	45872251
chr11	45873582	45888143
chr18	60926382	60926932
chr7	4396242	4397914
chr7	4429712	4430786
chr7	4441875	4444897
chr15	7087167	7088329
chr4	123464488	123465139
chr15	7094143	7096123
chr4	123581031	123582922
chr15	7112067	7114081
chr4	123593821	123595816
chr4	124362474	124364262
chr4	124370205	124371298
chr4	124377111	124379919
chr11	45897191	45900561
chr11	45909134	45910826
chr11	46089198	46090867
chr2	92831814	92833903
chr2	92867718	92874048
chr2	92883035	92887691
chr2	92971233	92973306
chr8	23508372	23510079
chr6	31541916	31544319
chr8	23521557	23522582
chr6	31563019	31566100
chr8	23574381	23579723
chr1	156885925	156889002
chr1	156896933	156900225
chr19	10415531	10417195
chr3	116535331	116537332
chr3	116616888	116618473
chr3	116624421	116625240
chr3	116630893	116632850
chr9	105033354	105034638
chr9	105297389	105298742
chr8	64155783	64156975
chr8	64223744	64224834
chr8	64236229	64239220
chr1	156904625	156908869
chr19	10462906	10464232
chr1	156910778	156912687
chr7	72532976	72533927
chr19	10489603	10493251
chr1	156928696	156931375
chr7	72561665	72563106
chr18	60933748	60936099
chr19	10504153	10511730
chr18	60989705	60991997
chr19	10597859	10601050
chr7	72610598	72613977
chr18	61025412	61027600
chr18	61047318	61048643
chr19	10629995	10630933
chr3	116650309	116662564
chr9	105386468	105387156
chr9	105396456	105398265
chr9	105421957	105425223
chr9	105437394	105440060
chr9	105545349	105545762
chr15	7122342	7124889
chr15	7132521	7133938
chr15	7138385	7143377
chr8	64320965	64325412
chr11	46124714	46126479
chr11	46250219	46250982
chr11	47164215	47165835
chr11	47184536	47186930
chr2	93027215	93029401
chr2	93101205	93103453
chr2	93149410	93154745
chr7	72789807	72790412
chr7	72838083	72838968
chr10	126862848	126864818
chr10	127013194	127014136
chr10	127057723	127059978
chr10	127079002	127081978
chr10	127098481	127100084
chr10	127102756	127106498
chr10	127111633	127114901
chr4	124385778	124387759
chr15	7155706	7157104
chr4	124391683	124392459
chr15	7172097	7174684
chr4	124428424	124430048
chr4	124432640	124433597
chr4	124443093	124444591
chr2	93173116	93175182
chr2	93301761	93303286
chr2	93459388	93460513
chr2	93662281	93662987
chr8	64328883	64331083
chr8	64379459	64382988
chr8	64386767	64390279
chr8	64391492	64394169
chr2	59363952	59367028
chr2	59449356	59452503
chr8	23607952	23610350
chr10	6820016	6824315
chr8	23614998	23619902
chr10	6924857	6926775
chr10	6927788	6935564
chr4	124448903	124450810
chr4	124478976	124480353
chr3	116663081	116672640
chr3	116723614	116723937
chr3	116770250	116771688
chr8	64399075	64401762
chr8	64405971	64407320
chr8	64762478	64764414
chr8	66508459	66510226
chr11	47188982	47193346
chr11	48612166	48615289
chr11	48629551	48632597
chr11	48639557	48640761
chr11	48682738	48687410
chr10	6942381	6944207
chr10	6948541	6952681
chr8	23646745	23649680
chr8	23671816	23674044
chr19	10635634	10637290
chr3	117569921	117572520
chr15	8058493	8059914
chr15	8391563	8396938
chr15	8617563	8619024
chr4	124494450	124495850
chr15	9000081	9005735
[truncated: 18,801 more rows]

## Sheet: WT unique H3K27ac peaks
##5950 WT unique H3K27ac peaks
chr	start	end
chr10	57800599	57803254
chr10	57813875	57814424
chr7	89796735	89797534
chr1	99818252	99819347
chr6	118813961	118818475
chr19	44482476	44483157
chr1	133068952	133069368
chr19	44636881	44638039
chr19	44981916	44982948
chr10	40478160	40478758
chr7	90714453	90714993
chr7	90803995	90804818
chr7	90806902	90808587
chr7	90894153	90894862
chr7	90957422	90960032
chr1	106665922	106667656
chr7	91027126	91028387
chr18	36562674	36563882
chr6	125288839	125289556
chr6	125290501	125291211
chr6	125376696	125376887
chr6	118882965	118883770
chr10	41220715	41221160
chr10	57880862	57882861
chr19	45098047	45098882
chr10	41568069	41568716
chr19	37180359	37181202
chr19	37189220	37191985
chr19	37210840	37212820
chr19	37229014	37229660
chr19	45101172	45103359
chr1	133651254	133651843
chr1	107760867	107762426
chr7	91817591	91819172
chr19	45376253	45376514
chr7	107579364	107580711
chr1	107877710	107878710
chr18	24367631	24368153
chr18	24446655	24449940
chr1	133742475	133742969
chr6	125425572	125428941
chr6	125430509	125433099
chr18	36672766	36673042
chr6	125439704	125440359
chr18	24646790	24646956
chr6	118942318	118943258
chr6	125462891	125463639
chr6	126055426	126058200
chr6	126091381	126093499
chr6	118968369	118970824
chr10	41598195	41601721
chr10	41603299	41603932
chr10	41615861	41616274
chr10	41628903	41631069
chr10	41700744	41701647
chr19	45634600	45634985
chr19	45823654	45824199
chr19	37285578	37286222
chr19	37289313	37290185
chr7	96264662	96265135
chr19	37395382	37396295
chr1	107970659	107971710
chr2	168833211	168833964
chr2	169496969	169497908
chr1	88387481	88389497
chr2	65008807	65009894
chr2	65069756	65072791
chr11	88664358	88664988
chr2	169499536	169500150
chr2	169554202	169557088
chr2	169558554	169560792
chr1	89516589	89517693
chr1	89536449	89537358
chr2	66094394	66095281
chr14	122205650	122206789
chr1	89722672	89723682
chr2	67289755	67290909
chr8	128034315	128035532
chr2	67319052	67319648
chr2	67342035	67344862
chr2	67430020	67431023
chr4	120621461	120622684
chr2	68049828	68050732
chr14	123302074	123302633
chr13	53022621	53023387
chr3	108926061	108926499
chr16	31303224	31303991
chr2	170133391	170133963
chr8	13599977	13601046
chr1	89724677	89726970
chr1	89753110	89753978
chr1	89754900	89756189
chr7	58732581	58733295
chr1	89787920	89788379
chr3	109143100	109144405
chr11	118001513	118003517
chr11	118084237	118085321
chr11	118086873	118088339
chr2	68229704	68230113
chr10	122219534	122220107
chr3	115376070	115377027
chr9	100980249	100981019
chr9	100982261	100983337
chr9	101092517	101093678
chr9	101094447	101094650
chr12	70547154	70549679
chr11	118089003	118090269
chr11	118090996	118092688
chr11	118103694	118104434
chr9	58690213	58691390
chr10	3227422	3228495
chr10	3928061	3928602
chr14	125166412	125168088
chr14	125171070	125171833
chr11	118114723	118116677
chr10	4794968	4796760
chr10	4797414	4797775
chr10	4810935	4811371
chr7	64577527	64577986
chr15	3200734	3201651
chr4	122693444	122694245
chr15	3373406	3374215
chr9	59306630	59307278
chr11	118284859	118286716
chr11	118320541	118321305
chr10	122463649	122464650
chr4	122912822	122914000
chr13	53995277	53996025
chr3	115389979	115391213
chr3	115395353	115397338
chr11	118901946	118902265
chr3	79055316	79058936
chr3	79059215	79060229
chr10	4812140	4813063
chr10	4820872	4824473
chr13	54569873	54570509
chr9	59516677	59517137
chr11	119080781	119081993
chr11	119120034	119120433
chr10	5137124	5138994
chr10	5151639	5152250
chr9	102344081	102345210
chr12	70747406	70747867
chr7	67149016	67150137
chr19	9191644	9193491
chr7	70960871	70961760
chr9	60393484	60393673
chr9	60512090	60513242
chr19	9391672	9393266
chr19	9693582	9694977
chr2	53567869	53569822
chr2	55284533	55285660
chr16	91560558	91562538
chr5	122915384	122927882
chr17	84388068	84390539
chr13	49238064	49243271
chr12	56587707	56590574
chr18	43279091	43279852
chr18	43288551	43289145
chr6	140698744	140700025
chr13	28604508	28605455
chr14	47646988	47647973
chr12	66166913	66171909
chr9	101082843	101086951
chr4	123124021	123126459
chr10	67701581	67702272
chr1	140242882	140243390
chr1	140473263	140474863
chr1	140475826	140476479
chr14	47672743	47673192
chr13	29269798	29270930
chr7	150480374	150482803
chr1	186264885	186265392
chr7	150598308	150598975
chr1	186270964	186271498
chr10	93051783	93052426
chr2	29592810	29593528
chr1	140511363	140511977
chr2	29658210	29658672
chr18	43584811	43585586
chr18	44482674	44484049
chr14	47702851	47704867
chr14	48038073	48038567
chr7	150790411	150791632
chr19	57157154	57159577
chr7	36181644	36182526
chr19	57168230	57170801
chr19	57188594	57195446
chr19	57204978	57208412
chr7	141870691	141871853
chr18	44485097	44485498
chr7	142801239	142802401
chr18	44745849	44747263
chr6	141270149	141270602
chr6	141277149	141278233
chr13	30049341	30050677
chr14	48116574	48117699
chr10	99949644	99950477
chr10	101969379	101970506
chr10	102147412	102147685
chr10	102148313	102150335
chr10	93186591	93187595
chr10	93261800	93263789
chr10	68258320	68258926
chr10	68418994	68419874
chr2	29880734	29881921
chr1	140821429	140821716
chr14	48134650	48135440
chr7	120026835	120028350
chr1	186694134	186695542
chr7	143568837	143570391
chr1	141224719	141225984
chr7	143880466	143881649
chr7	144031012	144032160
chr7	144041292	144042583
chr18	44760243	44761394
chr18	44770008	44771710
chr18	44773835	44774797
chr6	141280389	141282575
chr5	23953314	23954040
chr5	24092338	24093382
chr1	186705923	186707210
chr1	186732646	186732800
chr5	122928483	122941808
chr7	37512343	37513521
chr7	38146865	38147315
chr7	144043304	144045311
chr10	93529719	93530356
chr10	93531310	93531837
chr6	141286349	141287944
chr10	93888847	93890556
chr18	45428110	45429477
chr6	141356975	141358301
chr6	141359412	141360459
chr6	141367185	141367749
chr5	24229665	24230303
chr14	49078108	49078955
chr7	38465963	38467051
chr10	102174196	102177471
chr10	104935896	104937725
chr5	124194115	124198112
chr2	30070364	30070990
chr10	68712324	68713779
chr1	145853493	145853946
chr13	32327624	32328668
chr1	187040703	187042639
chr2	32496105	32496736
chr2	30141605	30142274
chr2	30199299	30200118
chr18	45437023	45438360
chr18	45448035	45449439
chr2	30236376	30237404
chr18	46402072	46402816
chr18	46433589	46434628
chr2	32497448	32499106
chr7	151948660	151950044
chr12	73867303	73871166
chr2	30242028	30243257
chr2	30258100	30258879
chr2	30268133	30268860
chr18	46537392	46538355
chr2	30284425	30285284
chr6	142443626	142445651
chr6	142451402	142453369
chr6	142470047	142470620
chr7	38967889	38968976
chr10	107615548	107618197
chr5	140206009	140207525
chr5	140208364	140209941
chr5	140251223	140252147
chr18	36953331	36953916
chr1	107972744	107973757
chr7	96414585	96416199
chr1	107974317	107975178
chr7	96540257	96541081
chr18	37828583	37828992
chr7	96558832	96560581
chr7	96564437	96565190
chr18	24875797	24876679
chr6	118986083	118988534
chr18	37854048	37854379
chr18	37866694	37867070
chr18	37874438	37874772
chr18	37880092	37880351
chr18	37906631	37906938
chr13	109087218	109088317
chr13	109106097	109106385
chr13	109272719	109273961
chr6	119004539	119004868
chr6	119012126	119013366
chr10	41808864	41810065
chr10	41812432	41812951
chr19	37613846	37614810
chr13	110701539	110702949
chr19	37617170	37618903
chr19	37628004	37628951
chr19	38079041	38079907
chr19	38298180	38299486
chr1	108175968	108176405
chr13	111324260	111325188
chr13	111335574	111336012
chr13	111350825	111351534
chr13	111360413	111361326
chr13	111368391	111368983
chr7	96921436	96923583
chr1	108212234	108214565
chr1	108444207	108447159
chr7	97117765	97118362
chr7	97168096	97169082
chr18	24957869	24958870
chr13	111484639	111485506
chr13	111497696	111498058
chr13	112263976	112264411
chr18	24959673	24961804
chr6	119049861	119050515
chr10	41963946	41965317
chr10	41988027	41988609
chr19	38335954	38336256
chr7	97171362	97173744
chr4	140869729	140870604
chr4	140909311	140909896
chr7	97208355	97209351
chr1	110468100	110470050
chr7	97256089	97256662
chr13	112790956	112792035
chr13	112841004	112841698
chr13	112872304	112873152
chr13	112885048	112885804
chr5	112729596	112730247
chr18	25097860	25100103
chr18	25105518	25107742
chr18	25210450	25211131
chr18	25326853	25327818
chr4	141129021	141129913
chr10	42726547	42729026
chr2	172265541	172266658
chr1	90985849	90987457
chr2	68966749	68967928
chr2	68973509	68977627
chr8	129139562	129141106
chr1	91035897	91037645
chr1	91087096	91088123
chr1	91473612	91473891
chr1	91476472	91476974
chr1	91772908	91773800
chr12	70852379	70853696
chr15	3399261	3400394
chr15	3448908	3449857
chr15	3454707	3455468
chr1	92495175	92496849
chr4	122970833	122971719
chr4	122976204	122977354
chr4	123081301	123083144
chr1	92927661	92928205
chr1	154644845	154647777
chr1	154895069	154895877
chr3	115491590	115492462
chr9	60695504	60698203
chr2	57033849	57034811
chr6	148501930	148502320
chr10	6020976	6021347
chr6	149006579	149006813
chr8	18767000	18769167
chr6	31137618	31138345
chr3	115653035	115655249
chr3	79709798	79711958
chr10	6224896	6225806
chr6	31154593	31155335
chr6	31156029	31158181
chr8	18852348	18853151
chr1	155071250	155072297
chr19	9910933	9911392
chr3	79751715	79752385
chr9	61478122	61478337
chr1	23475548	23475837
chr7	71486480	71486971
chr7	71518329	71519239
chr15	4018874	4020308
chr4	123092540	123093636
chr4	123100019	123102185
chr15	4029100	4030135
chr11	120030289	120030795
chr11	120079710	120080668
chr10	126461332	126462618
chr10	126617873	126620488
chr4	123131314	123133132
chr4	123137915	123138474
chr4	123156383	123158397
chr3	115871350	115871834
chr3	116091631	116092663
chr1	31053995	31055240
chr3	79753027	79753267
chr3	79770206	79771427
chr3	79778813	79779588
chr10	6298782	6299893
chr9	102814645	102815201
chr9	103103945	103104396
chr9	62051673	62054266
chr9	62083285	62083748
chr9	62184866	62185784
chr10	6448021	6448729
chr10	6449247	6450293
chr10	6454108	6454712
chr15	6209350	6211285
chr4	123204688	123205305
chr15	6228089	6229176
chr4	123225465	123226400
chr15	6336319	6338313
chr4	123229223	123231741
chr15	6575623	6576453
chr1	33419696	33420220
chr8	23275959	23277754
chr10	6540792	6542098
chr8	23318421	23319143
chr3	116344657	116345076
chr1	33776738	33777376
chr1	33805346	33806112
chr3	79846258	79847218
chr3	79856020	79856224
chr7	72494906	72496228
chr7	72518381	72519972
chr7	72523552	72524248
chr3	81948837	81949703
chr9	62198455	62199425
chr7	72526800	72528202
chr10	126719670	126720485
chr9	62272816	62273514
chr3	83757259	83759548
chr2	59064739	59065568
chr2	59238089	59241158
chr2	59244294	59245929
chr8	23369329	23371257
chr14	51404709	51405277
chr3	122642415	122643497
chr18	47308518	47309000
chr18	47428770	47429623
chr18	47473658	47474666
chr18	47477799	47478812
chr14	51588504	51589976
chr13	32860424	32865292
chr13	32888592	32889491
chr14	16209190	16209879
chr14	16309007	16310705
chr13	32942607	32943010
chr10	107621728	107623137
chr15	27488016	27490989
chr17	23892690	23893378
chr17	23953812	23955538
chr14	17332786	17334522
chr2	32588926	32592583
chr11	58822892	58825063
chr11	58882769	58885942
chr7	152486160	152487093
chr11	58891589	58894918
chr5	140807615	140808122
chr14	18530131	18531251
chr14	18578258	18580977
chr17	24300282	24300658
chr14	18610267	18611204
chr14	18616884	18617305
chr14	51606795	51607346
chr4	95223819	95224516
chr14	51617416	51618139
chr19	4186109	4187779
chr17	24302137	24302940
chr5	141084634	141085813
chr4	148896450	148897152
chr14	69882367	69882884
chr14	51759572	51760841
chr5	141232008	141233111
chr5	141247116	141248509
chr14	20614011	20614947
chr13	33054337	33054965
chr13	34098533	34099405
chr10	109431320	109432176
chr10	109436979	109437310
chr10	110189125	110190832
chr5	125862179	125866496
chr14	21207678	21208579
chr15	97535669	97536742
chr2	32689572	32691277
chr12	74768151	74770100
chr12	74770648	74781378
chr12	75038809	75047303
chr14	51765477	51766406
chr2	32760685	32761506
chr1	189821391	189822379
chr1	189834402	189835204
chr15	77749052	77752583
chr15	77763842	77764730
chr15	78004132	78005573
chr15	78097734	78099017
chr4	97448690	97450815
chr4	97451854	97452781
chr4	97475637	97478108
chr7	50537760	50538662
chr3	135105575	135110265
chr8	87223071	87226009
chr5	143759738	143760539
chr15	78169446	78171359
chr5	143779040	143779752
chr15	78182417	78183321
chr4	149466956	149469607
chr7	50706095	50706586
chr10	110434373	110435437
chr10	110436014	110436586
chr10	110530737	110532132
chr17	25270100	25270795
chr5	143816638	143818244
chr5	143826373	143827395
chr17	25347734	25349261
chr17	25376801	25377537
chr8	3252605	3253885
chr1	191067255	191067675
chr17	25401157	25402491
chr13	112949962	112951124
chr16	45353026	45353341
chr10	42734363	42735483
chr16	45356042	45358117
chr16	45363560	45364353
chr16	45365006	45367806
chr16	45369560	45372016
chr16	45375403	45379342
chr5	113361999	113363041
chr7	97301091	97301731
chr19	40332137	40332887
chr1	120349225	120350855
chr7	97574498	97574850
chr1	120373239	120373742
chr15	72752238	72753822
chr13	113490784	113492342
chr13	113533631	113535167
chr18	30512849	30515152
chr16	45767694	45768242
chr16	45810976	45811601
chr18	31948148	31949119
chr5	113574097	113574983
chr5	113575662	113578815
chr5	113585920	113586596
chr15	72799793	72803253
chr6	119690161	119691118
chr6	119774656	119775197
chr10	42878450	42880425
chr10	42888893	42889463
chr15	72966878	72968438
chr4	141273517	141274119
chr19	40394573	40395083
chr1	120462770	120463507
chr19	40414446	40416887
chr13	113835784	113836899
chr13	114299123	114300010
chr18	32101683	32104264
chr5	113590040	113590671
chr16	49698704	49699759
chr18	32107949	32108492
chr6	119873710	119875256
chr6	120002531	120003270
chr15	73270438	73271636
chr4	141514429	141514937
chr19	40420301	40424943
chr19	40459408	40461304
chr13	114640723	114642461
chr1	121394949	121395733
chr7	100147272	100147754
chr19	40462174	40463770
chr7	100166326	100166698
chr6	149066851	149068447
chr6	149115211	149116756
chr6	149141671	149142535
chr1	155200793	155201858
chr1	155432588	155433603
chr7	3295666	3296466
chr17	43463975	43464477
chr17	43496974	43505258
chr6	31489881	31491214
chr17	43510987	43514023
chr17	43514923	43516265
chr6	31535166	31536610
chr3	116393306	116393963
chr3	116497999	116498271
chr9	104095516	104096659
chr14	104118342	104118837
chr14	104233480	104234055
chr14	104348646	104350369
chr18	60900992	60902426
chr7	4080235	4081160
chr15	7010566	7011081
chr11	44529350	44531109
chr11	44553720	44555080
chr11	44679712	44680160
chr11	44710567	44711307
chr7	4115556	4116329
chr17	43525709	43527611
chr17	43528210	43529050
chr17	43535565	43539697
chr17	43542323	43543739
chr6	31538831	31540246
chr4	124380663	124382533
chr11	45890680	45891686
chr11	45915499	45916023
chr2	92880715	92882067
chr2	59268983	59270548
chr17	43544530	43545088
chr2	59276146	59277632
chr17	43595826	43596161
chr6	31546406	31547914
chr17	43596814	43597345
chr6	31566736	31569899
chr10	6661152	6662233
chr10	6712141	6713002
chr1	156901755	156902608
chr3	116608421	116610108
chr3	116622454	116623147
chr9	104929829	104931173
chr9	105382316	105383571
chr2	93002449	93002855
chr2	93003464	93003746
chr8	64159328	64162017
chr8	64189885	64190231
chr8	64275545	64276702
chr8	64301814	64304120
chr8	64311942	64313140
chr19	10449389	10450708
chr1	156918683	156919480
chr7	72604516	72607075
chr18	61008278	61008571
chr7	4445744	4446672
chr15	7143934	7145790
chr2	93005743	93007198
chr2	93143930	93144951
chr7	73048372	73048887
chr15	7151715	7154726
chr4	124418628	124419491
chr15	7524403	7525248
chr8	64343615	64344657
chr8	64372795	64374513
chr8	23626958	23627600
chr3	116685027	116685620
chr3	116687672	116689735
chr3	116724603	116725069
chr3	116726805	116728530
chr3	116811728	116812700
chr11	48805752	48806493
chr2	59494678	59495395
chr8	23629384	23634024
chr8	23637248	23637799
chr8	23644464	23645993
chr10	6953303	6956843
chr15	8048827	8049198
chr15	8118597	8119335
chr2	93730418	93731105
chr19	10677096	10677737
chr4	124614296	124614628
chr3	121067462	121068872
chr8	67170417	67171823
chr8	67267465	67268364
chr8	67355204	67356317
chr11	48877442	48878201
chr11	48899813	48900907
chr10	127185486	127187153
chr10	127401327	127402153
chr10	127504712	127506792
chr15	10747622	10747932
chr15	11996357	11997034
chr11	48926436	48928778
chr11	48931468	48931700
chr2	59498284	59499474
chr2	59511816	59512554
chr2	59544036	59544582
chr8	23683341	23684467
chr2	59606416	59607669
chr8	23685119	23686461
chr8	23811786	23812057
chr10	7387018	7387883
chr18	65838728	65839764
chr18	65846214	65847211
chr7	19525867	19526797
chr17	47761869	47762672
chr15	78349847	78351128
chr4	149618992	149620292
chr15	97585704	97586537
chr6	47762335	47764092
chr15	78385109	78385529
chr14	21691350	21691836
chr14	21710813	21713371
chr5	30104392	30105076
chr1	167602082	167603001
chr1	167647418	167649211
chr17	25922072	25922890
chr17	25933331	25934007
chr14	21789518	21790622
chr14	21850107	21852596
chr17	25960395	25960831
chr14	21866581	21867308
chr17	25965576	25966376
chr4	97483011	97483343
chr5	144312394	144313984
chr5	144330851	144331834
chr5	144332665	144333296
chr15	78698543	78699638
chr4	149869301	149869953
chr14	21877353	21878930
chr4	97525153	97528331
chr13	34447342	34448598
chr13	34876560	34877137
chr17	47905443	47906327
chr14	21925188	21927038
chr14	21929122	21930241
chr14	21996856	21997950
chr17	48178304	48179048
chr17	26201840	26202284
chr4	149961353	149962588
chr17	26260493	26261032
chr17	26263175	26263512
chr4	150086695	150088314
chr4	150205116	150205930
chr15	97793974	97794924
chr5	30558542	30560037
chr6	48521972	48523434
chr4	150206535	150210621
chr4	150233623	150235211
chr4	150237215	150238173
chr4	97540805	97541255
chr4	97552626	97553751
chr15	97949753	97950310
chr18	67828695	67829308
chr17	48554996	48556936
chr17	48561801	48563701
chr17	49571299	49571647
chr5	30912005	30914469
chr15	97992801	97993426
chr18	67941034	67941898
chr18	68140047	68140774
chr9	122078851	122080462
chr4	150994069	150994409
chr5	30945769	30947024
chr14	70723994	70725437
chr4	97775587	97776362
chr18	68147908	68148757
chr17	50141343	50142037
chr4	151127090	151128734
chr12	87967864	87968327
chr4	151224028	151227106
chr9	122756460	122757842
chr9	123048543	123050017
chr9	123057201	123057525
chr12	88122563	88123183
chr3	152376781	152377403
chr3	153570660	153572720
chr7	100285246	100285854
chr1	121723823	121725842
chr18	33607129	33608443
chr10	44167500	44168512
chr10	44350087	44350794
chr10	44848808	44849740
chr19	40525214	40526004
chr7	104165997	104168691
chr18	34008950	34010709
chr18	34268518	34269431
chr6	120529403	120530789
chr19	40530703	40532199
chr19	40704488	40705311
chr19	40710766	40712466
chr19	40718216	40718394
chr19	40721802	40723205
chr19	40733515	40735719
chr19	40752570	40753448
chr19	40767268	40768655
chr19	40769295	40771271
chr19	40772195	40774311
chr18	34810872	34811345
chr13	100621437	100622129
chr13	100627248	100628483
chr13	100894437	100895103
chr13	101262139	101262522
chr18	61204821	61207173
chr18	61211765	61212710
chr7	4607078	4607612
chr17	43805782	43806564
chr17	43841381	43842134
chr17	43848524	43849053
chr6	31574035	31575045
chr6	31587135	31588928
chr17	43931863	43932494
chr17	43948069	43949270
chr6	32447862	32448259
chr18	61214680	61216182
chr18	61217233	61218072
chr18	61218924	61219707
chr6	32733193	32733509
chr15	12064527	12065506
chr8	70460831	70461546
chr8	70616589	70617034
chr8	70644643	70645632
chr6	32931045	32931564
chr17	44035832	44037526
chr6	32946774	32947441
chr6	33000058	33002642
chr1	157246599	157247447
chr2	101518623	101519120
chr18	61487421	61487698
chr18	61500261	61502647
chr7	4876610	4877185
chr7	4895103	4895380
chr7	118681333	118682425
chr8	71258573	71259180
chr19	11119880	11120496
chr18	61532725	61534533
chr19	11121241	11123308
chr10	127585903	127588250
chr10	127594114	127594813
chr10	127604577	127605283
chr17	44129965	44130721
chr17	44155288	44156412
chr11	49861108	49861590
chr11	49922512	49923226
chr2	102603087	102603396
chr17	44157435	44158419
chr2	59640545	59641650
chr6	34263767	34264565
chr10	69645693	69646987
chr8	71414158	71416806
chr11	49960567	49961714
chr8	23894469	23895537
chr2	59790099	59791099
chr2	59806510	59807485
chr8	23988430	23988990
chr11	54658101	54658936
chr11	50042338	50043231
chr11	50090992	50091885
chr2	103442597	103443986
chr8	24258262	24259025
chr8	24308979	24309722
chr10	8486991	8487801
chr2	118872558	118872960
chr10	69891315	69891776
chr2	103445035	103445673
chr8	71639017	71639648
chr19	11879199	11879541
chr19	11885124	11886208
chr19	11887830	11889375
chr10	69954692	69955734
chr10	69956420	69958236
chr8	74805570	74805743
chr11	50155359	50155948
chr7	74388130	74389832
chr10	127780220	127783158
chr7	119351913	119352777
chr2	103691031	103691481
chr2	59914210	59915430
chr10	8584658	8588177
chr8	72178103	72178798
chr10	8589651	8592031
chr8	25516698	25517406
chr8	25533728	25535891
chr19	12067707	12069885
chr7	74405091	74405582
chr7	74410719	74411144
chr19	12660024	12660266
chr7	74486956	74487900
chr7	74512129	74513868
chr7	74562943	74563262
chr2	60070792	60071459
chr19	14660889	14661735
chr4	97785029	97785849
chr4	97867103	97868812
chr4	97924177	97925257
chr15	98356453	98357012
chr15	98385929	98386654
chr14	32603861	32604642
chr14	32685199	32686043
chr15	79664221	79665027
chr15	98421381	98422938
chr15	98446372	98447503
chr13	13631212	13631799
chr13	14051274	14053919
chr13	14207705	14207884
chr15	79677512	79677885
chr14	32880293	32881843
chr9	123146692	123148999
chr3	153592780	153596141
chr15	79866856	79868467
chr15	79872680	79874258
chr15	79879452	79880263
chr4	98847392	98848346
chr4	99381917	99382767
chr11	82670657	82671503
chr11	82743388	82747294
chr5	31271116	31271421
chr14	33516429	33517405
chr13	18833346	18833822
chr3	154491489	154492391
chr9	123419244	123419468
chr11	82878659	82879532
chr11	83004915	83005657
chr13	20266082	20267624
chr13	20272447	20273119
chr14	33701760	33703862
chr11	83279322	83281184
chr11	83777676	83778360
chr4	99607728	99608113
chr14	73578897	73580146
chr13	20329157	20330725
chr13	20346580	20347141
chr13	20524858	20525486
chr13	21259051	21261910
chr3	154715784	154717402
chr3	154718052	154719485
chr3	155871340	155872339
chrX	6151666	6152800
chrX	6153583	6153832
chr14	35221975	35222706
chrX	6154470	6155844
chr11	84783083	84783442
chr5	31829017	31829523
chr5	17432752	17435139
chr12	91294834	91295458
chr2	164617849	164619953
chr14	73653385	73654449
chr4	100855101	100856082
chr5	17496053	17498833
chr5	17505562	17506757
chr7	87888654	87889401
chr7	87890171	87892846
chr19	34336884	34337590
chr18	20752334	20753539
chr6	116288126	116288496
chr13	102491804	102493314
chr13	102499239	102501228
chr10	38703905	38705725
chr10	38711225	38714709
chr10	38891180	38893280
chr13	102523387	102524480
chr13	102688896	102689453
chr19	34420064	34420293
chr7	87939864	87942475
chr5	106173406	106174947
chr7	87994286	87994681
chr7	88038073	88039566
chr7	88054801	88055052
chr7	88076632	88077669
chr18	21095076	21095911
chr6	116590100	116590646
chr4	137355163	137357843
chr4	137468912	137470037
chr13	103092609	103094460
chr13	103104163	103104691
chr13	103125272	103126396
chr13	103160295	103162524
chr6	117084504	117085282
chr10	39093136	39093863
chr13	103415771	103416190
chr13	103448082	103449066
chr10	39102921	39103368
chr10	39117231	39117903
chr5	107554512	107555804
chr5	107557157	107560278
chr19	34657093	34657760
chr7	88081967	88082728
chr19	34933148	34934074
chr19	34935989	34936998
chr18	21390471	21391936
chr18	21399500	21400199
chr18	21402156	21402871
chr18	21408244	21409271
chr16	38591629	38592695
chr6	117532707	117533986
chr6	117575361	117576357
chr6	117728065	117729511
chr5	107660159	107660603
chr5	107704583	107705845
chr15	59430897	59431600
chr19	34995919	34996807
chr4	137860181	137861063
chr4	137875757	137876605
chr15	59499610	59500406
chr1	157799857	157800324
chr7	5076905	5077863
chr6	34569316	34570252
chr6	34591544	34592808
chr6	34634595	34635459
chr6	34679925	34680781
chr1	158585031	158586347
chr1	158671690	158671971
chr18	61709758	61711377
chr7	6296986	6297204
chr10	70514924	70515740
chr2	119170208	119171038
chr2	104318956	104319485
chr17	44385324	44386363
chr17	44386868	44387604
chr17	44391172	44392356
chr19	57082141	57083042
chr2	160802449	160805984
chr2	104704071	104704717
chr8	72528173	72529748
chr1	159006982	159007247
chr1	159174490	159174852
chr8	74876861	74879001
chr19	57143620	57144891
chr19	57147019	57148111
chr8	72596558	72597108
chr1	159310720	159311084
chr2	60652282	60653557
chr2	60672229	60672452
chr7	13466527	13467006
chr7	13483178	13483550
chr19	16297010	16298166
chr11	54910498	54912065
chr6	83377567	83378461
chr6	22013831	22014893
chr17	45692828	45693109
chr5	67320614	67321243
chr5	67339188	67339772
chr1	193281191	193282377
chr2	119236810	119237907
chr1	193292783	193293349
chr8	11271059	11272207
chr17	73588380	73590085
chr5	67365988	67367271
chr6	24582085	24583194
chr10	70820493	70821025
chr10	72759192	72759775
chr7	52583955	52585075
chr10	73732806	73734278
chr7	52644482	52645242
chr17	74338548	74342111
chr17	74595051	74596248
chr17	74684101	74685295
chr17	34375949	34377214
chr10	74554518	74555132
chr1	193330721	193331246
chr6	141212325	141214936
chr1	193374595	193375117
chr10	68708510	68711544
chr6	84151127	84152514
chr17	74942666	74944629
chr6	28433033	28433796
chr8	75085034	75086883
chr19	57179931	57181933
chr19	57182882	57184349
chr8	11295941	11297908
chr8	11298681	11300009
chr4	150151146	150153655
chr6	84162586	84163882
chr17	75116581	75117335
chr5	68402898	68403976
chr11	55262228	55264199
chr11	55286649	55288055
chr11	55315635	55316480
chr4	150157873	150160053
chr17	75838344	75839509
chr17	75839924	75841830
chr5	70054848	70056115
chr17	34768935	34769679
chr11	57344067	57345162
chr2	119509989	119510342
chr2	119515582	119516771
chr1	193812970	193814275
chr2	119797289	119798485
chr1	193902278	193903289
chr10	74766705	74767501
chr1	193914138	193914879
chr6	85292894	85293491
chr17	34817809	34820035
chr6	29155068	29156059
chr8	11336354	11337158
chr1	77192759	77194298
chr16	20106881	20108101
chr16	20279183	20281773
chr5	72813567	72815085
chr5	72825911	72828038
chr10	116765370	116766796
chr10	117143962	117144588
chr10	117183532	117183842
chr10	117265788	117266618
chr15	99154480	99157648
chr14	73776735	73777777
chr14	73875699	73877391
chr14	73902472	73904001
chr13	22005904	22006758
chr2	164727178	164727749
chr10	61496451	61497240
chr10	61512359	61513344
chr13	22032377	22033166
chr13	22113162	22114147
chr13	22117926	22118730
chr5	17541762	17542721
chr2	165142806	165143249
chr8	124487682	124488889
chr14	74952693	74953269
chr14	74954284	74954580
chr10	61693499	61694642
chr19	47372429	47373157
chr1	135759541	135760385
chr5	20264867	20266757
chr5	20336452	20338087
chr5	20338835	20339056
chr14	35346827	35347333
chr14	35371728	35372475
chr12	99986716	99987869
chr12	100158581	100158851
chr11	85650345	85650856
chr11	98569579	98572626
chr15	38306594	38308826
chr1	135788359	135790364
chr1	135812955	135814720
chr4	133205836	133206062
chr19	47483202	47484548
chr1	135817576	135818964
chr4	81976125	81976966
chr4	81984271	81985509
chr13	22132771	22133294
chr4	6352021	6352877
chr4	6353630	6355107
chr2	165642662	165643770
chr2	165658222	165659713
chr4	6826613	6826911
chr13	83722828	83723649
chr11	98664692	98665843
chr13	83724251	83725036
chr13	83730441	83731655
chr13	83739374	83740103
chr7	111367464	111367978
chr13	23541584	23542388
chr15	88688479	88690231
chr5	20349613	20350688
chrX	8779234	8780765
chrX	8799117	8800431
chr8	125035204	125036708
chrX	9833350	9835910
chr11	98768611	98768873
chr11	28482920	28483909
chr13	83791441	83792623
chr13	85348263	85348887
chr18	39017796	39018864
chr6	134114888	134115243
chr10	61779717	61780031
chr14	63819399	63821329
chr14	63833828	63834349
chrX	10095491	10096474
chr11	86484521	86485481
chr11	86492447	86493556
chrX	10335710	10337399
chr2	165725640	165726330
chr12	81572335	81573451
chr12	81607833	81608655
chr19	47512723	47513397
chr14	63836132	63837532
chr4	82010685	82012826
chr4	82042810	82043359
chr14	41760943	41762438
chrX	10434282	10434849
chr2	165745046	165745675
chr2	165780194	165780961
chr8	125080486	125081093
chr11	98981278	98982715
chr3	19957411	19958368
chr3	19981318	19982554
chr12	81906592	81906950
chr3	20720763	20721897
chr7	111518269	111519025
chr15	38444661	38445696
chr4	82055475	82057028
chr4	82058097	82059111
chr4	82061721	82062486
chr4	9060512	9061562
chr4	9541020	9542371
chr4	9543064	9543828
chr11	86528106	86529381
chr11	86558352	86560004
chr11	30032900	30033709
chr2	76766225	76769498
chr9	21078014	21078826
chr18	39030402	39032160
chr18	39034423	39035146
chr14	44561061	44561609
chr4	10959857	10960588
chr1	75247891	75248343
chr8	125165776	125166095
chr8	125175254	125175972
chr2	76799758	76800418
chr13	85577080	85578545
chr9	21216034	21216897
chr2	76801196	76805172
chr3	141977289	141979649
chr9	21231772	21233443
chr13	88341009	88341812
chr3	141981164	141981566
chr18	39071128	39072259
chr15	89005635	89006485
chr5	20544040	20544836
chr10	93945723	93948370
chr8	125229370	125230945
chr11	86652815	86654020
chr10	61965660	61967234
chr10	62040690	62041498
chr7	146452880	146453277
chr10	94002695	94003429
chr10	94014217	94015315
chr15	38759365	38759569
chr5	107866603	107867352
chr6	117869054	117870101
chr16	38706223	38707558
chr6	117870818	117871724
chr6	118512345	118512638
chr16	38724434	38726517
chr10	39802378	39805340
chr4	138667160	138667678
chr19	36737138	36739003
chr7	88705717	88706476
chr4	138702266	138703342
chr4	138731574	138732350
chr13	105422390	105423205
chr13	105482656	105483794
chr13	105484538	105485501
chr6	118589032	118589876
chr6	118655737	118656569
chr6	118742110	118743245
chr16	38743905	38744398
chr5	108430174	108430536
chr6	118745784	118746729
chr16	39692524	39694193
chr5	108508434	108509574
chr16	39695829	39697005
chr19	36992863	36993850
chr19	37094926	37095907
chr19	37104229	37104949
chr15	62133334	62134310
chr15	62750700	62751751
chr19	37105478	37106320
chr18	24170252	24170725
chr13	92882828	92883612
chr13	108466189	108467467
chr13	108948409	108949214
chr13	109059331	109060657
chr13	109061616	109063465
chr5	108894961	108896087
chr16	42938110	42938545
chr5	110295334	110295957
chr16	43309906	43310583
chr5	110539069	110539490
chr17	45718000	45718831
chr18	61911136	61912010
chr17	45755914	45757084
chr17	45817772	45818427
chr18	62000424	62001830
chr18	62017380	62018918
chr14	27880979	27881598
chr13	9471839	9473461
chr13	9503152	9503920
chr13	9515193	9515826
chr13	9567920	9568770
chr14	28058225	28060020
chr14	28080431	28081837
chr13	11658619	11659475
chr13	11677403	11677993
chr13	11754873	11755841
chr13	11830318	11832873
chr13	11847379	11847706
chr13	11849903	11850253
chr13	11858610	11859256
chr13	11862644	11863513
chr10	74777026	74778771
chr10	74796346	74798180
chr8	75246871	75247440
chr8	75750746	75751334
chr19	57197901	57199921
chr13	11878896	11880074
chr14	28112173	28113882
chr13	11955988	11956977
chr7	119743095	119743967
chr7	119794093	119794787
chr1	145923341	145925614
chr17	78753316	78755152
chr17	78761034	78763146
chr17	79081536	79082651
chr13	11995415	11996832
chr13	12010217	12013619
chr13	12015169	12016172
chr11	57510212	57511223
chr11	57833621	57835789
chr11	57846394	57848401
chr11	57852515	57853550
chr18	50206758	50208754
chr17	79120194	79120949
chr17	35071014	35072372
chrX	156380312	156382696
chr17	35098603	35099623
chr13	12025384	12027765
chr13	12055707	12057030
chr13	12067407	12069323
chr13	12069966	12071572
chr2	35539420	35540129
chr6	29816667	29818235
chrX	157204178	157204791
chr14	31354930	31355225
chr10	75049507	75051490
chr1	194615034	194615938
chr8	77632840	77633272
chr19	6272601	6274949
chr17	79736757	79739076
chr6	86821688	86823171
chr16	20677655	20678595
chr19	57289180	57289925
chr7	119936935	119937932
chr7	52967509	52968072
chr11	57929959	57930261
chr7	53086069	53086428
chr17	79778379	79779458
chr17	80401467	80402564
chr17	80452946	80454488
chr6	29884561	29886064
chr11	57984826	57985584
chr11	57997150	57998007
chr10	117333462	117335090
chr10	117336718	117336996
chr10	117379681	117380958
chr13	45539589	45540753
chr6	30180255	30181000
chr16	21332597	21334031
chr5	73282170	73283221
chr2	35736028	35737195
chr1	194916319	194917092
chr2	35890752	35891634
chr5	73314953	73318887
chr5	73324037	73325205
chr5	73339146	73340461
chr8	79555153	79556900
chr8	11440987	11441871
chr1	195077062	195078019
chr7	120029088	120030096
chr7	120202304	120203682
chr1	195078666	195079274
chr1	195080716	195081655
chr13	45731822	45732078
chr13	45816695	45817787
chr13	45820024	45821071
chr13	45891707	45893658
chr13	46276305	46276714
chr6	30223001	30224018
chr17	35359022	35359714
chr6	30235595	30236754
chr19	6376760	6378294
chr11	58660338	58660954
chr19	6943643	6944267
chr13	46326558	46326809
chr13	46610001	46613941
chr13	46639031	46640152
chr13	46641948	46646903
chr6	30242316	30243149
chr6	30293955	30294432
chr16	21590542	21591337
chr10	117557849	117558726
chr10	118476809	118477474
chr2	36004237	36005002
chr5	73656681	73657124
chr6	30324665	30325091
chr17	35862436	35863093
chr6	30325770	30327220
chr1	195451652	195453303
chr11	99084388	99085027
chr4	82072025	82073938
chr11	100230094	100232330
chr3	21812816	21813505
chr11	30036881	30037879
chr1	136277801	136279486
chr1	75363285	75364015
chr8	125412244	125413156
chr1	75383787	75385470
chr3	21854169	21854916
chr11	30049907	30050658
chr11	30072847	30073840
chr19	47718531	47721487
chr7	146508923	146510094
chr7	146601178	146603015
chr8	125461397	125462289
chr8	125484802	125485588
chr8	125499721	125500313
chr7	30237475	30238918
chr4	133720847	133721338
chr3	142001925	142003055
chr3	142008106	142009369
chr7	112916057	112917418
chr18	39097659	39098708
chr2	166440609	166441409
chr2	166482049	166483183
chr10	94681070	94681958
chr1	75432298	75432969
chr11	100302132	100302727
chr3	142031543	142033525
chr3	142035538	142036111
chr3	142037886	142039126
chr6	134723695	134725155
chr13	91965611	91966190
chr18	39173494	39177956
chr3	142048104	142048875
chr5	21242668	21243280
chr7	146647821	146648734
chr8	125542120	125542897
chr1	75614653	75615355
chr8	125560415	125561581
chr11	30086770	30087643
chr3	21988552	21989161
chr13	92862800	92866689
chr3	21991721	21992426
chr11	30090073	30092740
chr2	76947758	76949038
chr12	82039879	82040292
chr18	39255884	39256274
chr18	39279148	39280826
chr19	53161223	53162731
chr4	82126602	82126930
chr14	64576964	64577833
chr14	64581479	64582343
chr2	30557960	30558515
chr7	146661763	146662358
chr7	146869643	146870626
chr2	166800738	166803670
chr2	76964267	76966436
chr2	76967275	76969497
chr12	82959624	82959952
chr2	76970303	76970997
chr12	82970380	82970933
chr19	53230768	53231311
chr15	38863038	38864091
chr13	115086731	115087641
chr13	24534455	24534674
chr13	24802741	24805211
chr18	80513644	80515069
chr2	166942752	166944989
chr1	76017357	76018341
chr9	21588488	21590037
chr9	21591799	21593717
chr15	39652995	39653244
chr11	100465260	100465992
chr13	115153557	115154523
chr13	115624615	115625325
chr13	115793876	115794297
chr13	115876041	115877121
chr15	89415910	89416345
chr10	94699288	94699525
chr1	77044967	77046273
chr8	42199398	42201696
chr8	42205629	42206382
chr3	142073425	142074825
chr11	100565182	100565783
chr13	115886563	115886827
chr3	142156825	142158172
chr13	115914576	115915079
chr13	115921259	115922802
chr13	117918388	117918680
chr13	118499432	118500302
chr5	22931598	22933594
chr2	30605171	30606218
chr2	30639697	30640259
chr2	30650293	30650718
chr2	167000569	167002648
chr1	77197517	77199362
chr1	77438111	77439119
chr8	126309328	126310625
chr8	42335966	42336483
chr11	30124278	30124968
chr13	119851872	119852140
chr13	120190450	120191622
chr15	40553355	40554649
chr15	40570191	40571752
chr13	120276761	120277383
chr14	8641307	8642169
chr14	65350352	65350700
chr14	65500960	65504418
chr18	80548280	80549876
chr18	80550569	80551314
chr4	133876903	133877831
chr14	8662304	8662737
chr4	133885784	133886474
chr14	8790841	8791637
chr5	115468757	115469263
chr18	80900525	80902835
chr3	142519841	142520210
chr9	118869081	118869939
chr9	118884999	118885859
chr10	94947594	94948390
chr10	94963957	94964558
chr10	94970846	94971977
chr10	94994745	94995392
chr10	94995594	94996770
chr3	144200305	144202799
chr9	118940250	118940954
chr9	118945911	118946939
chr13	94203052	94203478
chr13	94228174	94229718
chr13	95152051	95152815
chr15	63959783	63960473
chr4	138807150	138807935
chr15	64057223	64058502
chr4	138843415	138844126
chr13	96404405	96404608
chr13	96408965	96409684
chr5	100840236	100841352
chr16	43349420	43350291
chr16	43379612	43380306
chr5	100946867	100948127
chr16	43395236	43396033
chr4	134473763	134475229
chr4	134775976	134777091
chr13	96429252	96430235
chr16	43407591	43408169
chr5	110887930	110888588
chr13	97280821	97281818
chr5	101266748	101267923
chr4	139148640	139151277
chr4	134816268	134818690
chr16	43408909	43409836
chr16	43420465	43420892
chr4	134838679	134839470
chr13	98848088	98849596
chr15	64253056	64253809
chr16	34058412	34058846
chr4	139167469	139167694
chr5	102366505	102367386
chr5	102395877	102399702
chr5	102410062	102412123
chr5	102419117	102419847
chr5	103131680	103132390
chr4	134872765	134873906
chr5	111539621	111540436
chr5	111543948	111545781
chr15	66524432	66525201
chr4	140269062	140271243
chrX	157431915	157433008
chrX	158020193	158020564
chrX	158127517	158127737
chr13	12075478	12076631
chr13	12101798	12102125
chr13	12106591	12109710
chr4	155207881	155208454
chrX	158180493	158181357
chrX	159309385	159310050
chrX	160351838	160352886
chr13	12110204	12110685
chr13	12117461	12118809
chr13	12120257	12121168
chr13	12134806	12135887
chr13	12136908	12137584
chr13	12138866	12141038
chr4	155256973	155258548
chr14	31689068	31690019
chr4	59212094	59212974
chr13	46777537	46779539
chr4	115796412	115796978
chr13	46820143	46820948
chr4	59304963	59305600
chr4	59325733	59326517
chr14	31938148	31939195
chr13	46929411	46930927
chr14	31977036	31978566
chrX	162607993	162608730
chrX	162878337	162878931
chr13	12147004	12148638
chr13	12159800	12161686
chr4	116034821	116035304
chr13	46991361	46992283
chr17	35908589	35909209
chr6	30340724	30341200
chr13	12172916	12174056
chr13	12175364	12176348
chr6	30649972	30650945
chr15	83272661	83273396
chr15	83274643	83275428
chr1	195494623	195495097
chr1	196104450	196105695
chr1	196439360	196440400
chr14	111017743	111018305
chr14	111729808	111730264
chr16	21818571	21819404
chr5	3368181	3369265
chr4	116393055	116393982
chr13	47021456	47022980
chr13	47138295	47139282
chr6	31032376	31033437
chr2	37382009	37383547
chr2	38389108	38389589
chr14	118468545	118470193
chr1	196470849	196472388
chr5	74656271	74657281
chr19	7079097	7079952
chr14	118950417	118951685
chr14	118992192	118992824
chr14	118993784	118995407
chr14	119090246	119091854
chr7	54268833	54269172
chr7	54297670	54298999
chr4	117024107	117025344
chr4	117028562	117030166
chr17	36258247	36259607
chr6	31087311	31088425
chr6	31108683	31109732
chr10	120406106	120407173
chr5	75078446	75079168
chr1	196518888	196519962
chr1	196641344	196642009
chr8	12897561	12898727
chr1	196753521	196754475
chr15	90871935	90872795
chr15	91021537	91022969
chr5	22950105	22950882
chr1	78814345	78816087
chr5	115593105	115593809
chr4	144725924	144727834
chr4	144789945	144790541
chr4	144822897	144824238
chr4	144829205	144830331
chr15	92194652	92195906
chr5	23006595	23007892
chr1	79820045	79821158
chr1	80479926	80480523
chr1	81692172	81693172
chr1	82235394	82236875
chr1	82241046	82242188
chr1	82262538	82266380
chr1	82268276	82270425
chr2	30942730	30943368
chr2	30944021	30944677
chr7	148210604	148212829
chr1	87545366	87546852
chr4	134035171	134036186
chr5	115594472	115597949
chr5	115653771	115655100
chr4	146816829	146817989
chr4	147246711	147247833
chr14	65989570	65990909
chr4	84529844	84530902
chr7	148281721	148283160
chr18	81003661	81004284
chr1	145876896	145877402
chr1	151257308	151258919
chr6	142519852	142520606
chr3	144360927	144362024
chr3	144764518	144766103
chr14	9141371	9143039
chr14	9832943	9833657
chr14	11387305	11387531
chr14	12358898	12359464
chr15	93325048	93325702
chr7	30973409	30974091
chr18	82981693	82982803
chr6	142659455	142661001
chr7	31001143	31001928
chr1	152887517	152888623
chr3	145140241	145142206
chr9	119353878	119354474
chr16	58600788	58601343
chr15	42598808	42601619
chr14	66211609	66212197
chr10	95045446	95046064
chr10	95140344	95142014
chr6	142798655	142799058
chr15	42705712	42706271
chr15	44498078	44500376
chr4	86298150	86298521
chr4	86396308	86397430
chr7	148452009	148452679
chr7	148523903	148524985
chr15	44505988	44508151
chr18	47499749	47500706
chr18	83227420	83229225
chr18	47600102	47602205
chr18	47743917	47746159
chr15	44521614	44522025
chr14	12674213	12675124
chr16	59593755	59595109
chr5	23825811	23827188
chr5	23847829	23848939
chr18	83641165	83641764
chr7	31394977	31395610
chr6	145729379	145732228
chr10	95170569	95171257
chr6	145757735	145758927
chr1	153204776	153205731
chr1	153213627	153215348
chr15	51423505	51424897
chr15	51649911	51650542
chr4	134334799	134335531
chr4	134369649	134371105
chr14	66737123	66739397
chr10	95290584	95292343
chr10	95428516	95429192
chr10	95430295	95430866
chr18	50108868	50109423
chr18	50187770	50188726
chr3	145609429	145610295
chr15	76344909	76345221
chr7	149206081	149208008
chr15	51783526	51784069
chr15	52543528	52544205
chr15	53080245	53081010
chr15	53095403	53096321
chr15	53185427	53185756
chr11	65054308	65056362
chr13	99699873	99700454
chr16	34358742	34359245
chr5	103246622	103247485
chr16	43559963	43560946
chr16	43583996	43584987
chr5	111695417	111696627
chr15	57536200	57538118
chr15	57539468	57542188
chr5	111937960	111939247
chr15	66751292	66752149
chr4	135353777	135354488
chr15	66761614	66764969
chr4	135357173	135357881
chr15	66871194	66872271
chr13	99897786	99899073
chr13	99964293	99964852
chr13	99971692	99972782
chr16	34907571	34909955
chr4	140686713	140687709
chr15	66964292	66965325
chr16	34995824	34997940
chr15	66987860	66988300
chr15	57743436	57744098
chr4	135424762	135426483
chr15	67095012	67095755
chr15	57776882	57778727
chr15	57784505	57785345
chr4	135465343	135465932
chr16	44680510	44681500
chr13	99997914	100001863
chr16	45256624	45258564
chr16	45328078	45332226
chr13	100024369	100025409
chr16	45343063	45345179
chr16	45347336	45347664
chr12	16917872	16919370
chr5	104228273	104228854
chr12	17708394	17711260
chr11	72266409	72266897
chr5	104356682	104357057
chr12	17752943	17754362
chr12	20821026	20822042
chr11	72298380	72299159
chr11	72548260	72549101
chr11	72616566	72617294
chr11	72619706	72620470
chr14	32010866	32012031
chr14	32029050	32030052
chr14	32030710	32031659
chr14	32039683	32041280
chrX	163470033	163471185
chrX	163525236	163527319
chrX	163529416	163530351
chrX	163541045	163542206
chrX	163546223	163546837
chr13	12302834	12304386
chr13	12336241	12336791
chr5	3432816	3433285
chr5	3465923	3466678
chr14	58609774	58612395
chr4	59850679	59851212
chr4	117354582	117355159
chr14	59430780	59432559
chr14	32161381	32161838
chr14	32197983	32198623
chr4	117581049	117581963
chr14	120718539	120719172
chr14	120719763	120720542
chrX	163604752	163605718
chr4	62008829	62010334
chrX	163638843	163639637
chr4	62035264	62036207
chr14	120729099	120730939
chr14	120739940	120741822
chr16	23609418	23610957
chr16	23964817	23965186
chrX	165085652	165086402
chrX	165100353	165101228
chrX	165101852	165102382
chrX	165216519	165217469
chr13	12341278	12342554
chr17	42767052	42767355
chr19	7348981	7350151
chr4	118161532	118162669
chr4	118172874	118173711
chr17	42779975	42780911
chr15	84026499	84027704
chr17	42952620	42955230
chr5	4006021	4007267
chr10	120850270	120850958
chr10	120857006	120859666
chr14	120790181	120791239
chr14	120792920	120794113
chr14	120801906	120802609
chr4	118919429	118921113
chr10	120881319	120885525
chr2	44390672	44391675
chr1	196769648	196770398
chr4	118960255	118961218
chr11	115954801	115955696
chr11	116028790	116029801
chr12	117532210	117532754
chr12	118686023	118687750
chr1	196775861	196776509
chr8	13168873	13170442
chr1	196807149	196809599
chr14	121404971	121405253
chr14	121507021	121508483
chr12	118688367	118689666
chr12	118735246	118736101
chr11	116355292	116356920
chr8	13213434	13214436
chr12	118906960	118908647
chr12	118914746	118915867
chr12	118917470	118918994
chr14	122059294	122060667
chr14	122074786	122076018
chr14	122104515	122105557
chr14	122179013	122182544
chr14	122192330	122193129
chr11	50654648	50655051
chrX	106315638	106316201
chrX	106337197	106338372
chrX	110298649	110299048
chr12	118966637	118967209
chr10	120935146	120936408
chr2	45101371	45102032
chr2	45107151	45108246
chr1	196831323	196833111
chr11	51103164	51103417
chr7	112926557	112927920
chr7	112932881	112933976
chr7	112935323	112936646
chr7	112941795	112942639
chr12	119000605	119002781
chr12	120336163	120336767
chr9	55072410	55073927
chr9	55080197	55080749
chr1	196838882	196839444
chr2	45436698	45437102
chr11	116555151	116557040
chr11	116565805	116567263
chr11	116582914	116584112
chr11	116667604	116668513
chrX	111587570	111588529
chrX	115230733	115231283
chrX	130227949	130228496
chr7	56685923	56686754
chr7	56763020	56763924
chr4	87579287	87580380
chr15	95657319	95658501
chr1	153418285	153419530
chr1	153465941	153467037
chr15	76437497	76437958
chr14	12706526	12707555
chr15	95659229	95659878
chr15	95666378	95668403
chr14	12889654	12892123
chr16	65451394	65451937
chr5	116014927	116015656
chr5	23938983	23940187
chr14	67277352	67280407
chr14	67280876	67282143
chr14	67291415	67292100
chr4	88402607	88403600
chr18	52909337	52910848
chr10	82453745	82454599
chr5	116022362	116024390
chr5	116102424	116103517
chr5	116304065	116305214
chr14	67457357	67459373
chr4	88787014	88787350
chr4	88818705	88819872
chr15	96127273	96128066
chr10	96368115	96368591
chr6	146421154	146422483
chr2	31636979	31639002
chr18	53397910	53398621
chr6	146483547	146488094
chr5	116857555	116859568
chr7	135047550	135047887
chr15	76469819	76470315
chr15	96145567	96146793
chr14	67481796	67483518
chr7	149516031	149516816
chr1	154017479	154018418
chr1	154070008	154071803
chr11	65566860	65567881
chr14	12939763	12941184
chr14	12966454	12969752
chr14	67620546	67621100
chr15	96422218	96422918
chr15	96516148	96517441
chr18	85083787	85085087
chr1	154271873	154272538
chr18	54062778	54063380
chr6	146644617	146648009
chr10	83322718	83323195
chr14	14900315	14900590
chr14	15465206	15466265
chr14	67687274	67688952
chr18	89100737	89102465
chr18	89140886	89141583
chr7	34981106	34981888
chr7	35010674	35011273
chr7	35012799	35013609
chr18	55116905	55118996
chr6	146686969	146687966
chr10	98434540	98435261
chr6	146690669	146691505
chr1	154307655	154309898
chr1	154346502	154347507
chr11	66798589	66799086
chr11	66806957	66807252
chr11	66838210	66839075
chr5	116865593	116866520
chr11	66853764	66854614
chr15	76648771	76648958
chr14	67854104	67854849
chr10	98634788	98635385
chr6	146717628	146719510
chr6	146805890	146806481
chr10	83400358	83401236
chr2	20938487	20939313
chr4	148223086	148223804
chr15	76828291	76829291
chr15	76838647	76841002
chr11	95931324	95933255
chr11	17563793	17564231
chr11	18481422	18482101
chr11	18826950	18828231
chr7	149670600	149671618
chr6	146838867	146839759
chr1	154407412	154409109
chr1	154413196	154414786
chr1	154415671	154418099
chr8	91170772	91171633
chr4	148301789	148302832
chr16	77016904	77017255
chr16	77023945	77024792
chr16	77028437	77029538
chr11	96179756	96180678
chr11	96202373	96203541
chr11	96213921	96214784
chr11	18863140	18864034
chr11	18864793	18865065
chr1	154439524	154441171
chr1	154441506	154442779
chr7	35045166	35045642
chr19	3543395	3544025
chr18	56920130	56921052
chr16	77344619	77345160
chr16	77348854	77349601
chr16	77400601	77401396
chr10	98872025	98872882
chr11	67674771	67675523
chr11	67732853	67734621
chr2	32032276	32033219
chr2	32046265	32046687
chr7	150199554	150200622
chr2	23904034	23904502
chr8	93180098	93180783
chr8	82143899	82144882
chr7	125995913	125997704
chr11	59923800	59924152
chr2	125180987	125181774
chr15	58016967	58017324
chr4	135678583	135679972
chr2	125302117	125302706
chr5	104524436	104525931
chr8	83319287	83319824
chr11	72844228	72844468
chr7	127019191	127019967
chr2	4476085	4477158
chr7	127084891	127086261
chr9	70758070	70758837
chr9	70824929	70825815
chr4	135879724	135880291
chr4	136014415	136015532
chr11	59944888	59947612
chr2	125450252	125451349
chr2	151361742	151362757
chr16	35747363	35748593
chr5	105288836	105289331
chr5	105417265	105417717
chr5	105567552	105568263
chr2	125905609	125906891
chr2	125910020	125910433
chr10	79208993	79209288
chr8	108370494	108371664
chr5	105569891	105570479
chr5	105573666	105576860
chr12	21386057	21387040
chr15	58645713	58646640
chr10	79256064	79258184
chr10	79267548	79271303
chr15	58677464	58680513
chr11	74271505	74272542
[truncated: 3,952 more rows]

## Sheet: CKO unique H3K27ac peaks
##8161 CKO unique H3K27ac peaks
chr	start	end
chr15	101833454	101833887
chr15	101846132	101847449
chr12	76803082	76804235
chr12	76969823	76970959
chr9	34963101	34965475
chr11	3753092	3754296
chr14	63035061	63036277
chr14	63127884	63128905
chr14	63174159	63174976
chr16	32540041	32542700
chr16	32551347	32551762
chr16	32568635	32569283
chr16	32597985	32598361
chr12	8542643	8543495
chr12	76980712	76981374
chr12	77296626	77297528
chr18	54966958	54968009
chr5	68076313	68077023
chr12	77425795	77426223
chr18	55077983	55078592
chr12	77531806	77532816
chr14	63486639	63487292
chr15	78214130	78215097
chr11	3935823	3936672
chr4	137237273	137237750
chr4	137305790	137307916
chr9	25367545	25368170
chr12	77567750	77569188
chr12	77587604	77588622
chr18	55112123	55113686
chr12	77741557	77742761
chr7	17030019	17030920
chr5	68195119	68195477
chr5	68206760	68207370
chr17	72023138	72024988
chr11	76237701	76238828
chr5	64730727	64733110
chr17	66056938	66057503
chr17	66116858	66119207
chr7	17098717	17099147
chr7	17109352	17110543
chr7	17111170	17111804
chr9	107603012	107605762
chr4	140924120	140924750
chr4	140961820	140963392
chr9	35041855	35043175
chr11	76460696	76461270
chr11	76649390	76650010
chr9	102661523	102662364
chr4	137411564	137412053
chr9	35242975	35243376
chr18	55115385	55115914
chr9	26355603	26356464
chr9	26947962	26948956
chr17	72040806	72041263
chr18	55176687	55178070
chr17	72051941	72052634
chr18	55200173	55200773
chr5	64891736	64892410
chr17	66256294	66256769
chr17	72058218	72061092
chr5	68720512	68720759
chr5	69731762	69733170
chr18	43261876	43262725
chr5	64899881	64900340
chr5	64989939	64991283
chr9	102910629	102911133
chr9	103272019	103272698
chr4	137629348	137630357
chr4	137633511	137634669
chr4	137687084	137687415
chr9	28097001	28097833
chr9	29027977	29029039
chr9	29076221	29077016
chr18	43430811	43432335
chr18	43441275	43442273
chr18	43502272	43503757
chr18	43569265	43571204
chr9	103300646	103301745
chr9	103342771	103343737
chr9	103392591	103395324
chr9	103397027	103397800
chr9	103471098	103472368
chr9	103480973	103483808
chr9	103525872	103526464
chr9	103580815	103581672
chr4	137719756	137720830
chr4	137740180	137741695
chr10	83887398	83889429
chr13	38004120	38006291
chr8	11563415	11563830
chr11	103549758	103550179
chr15	32238150	32238792
chr15	33520694	33520972
chr15	33616064	33617633
chr19	56726255	56728380
chr19	56762826	56764283
chr19	56791958	56792986
chr2	165852980	165853787
chr7	66043226	66044863
chr7	66055693	66056768
chr2	165908392	165910556
chr16	18052881	18053295
chr3	126317706	126318494
chr9	118493939	118495245
chr9	118497989	118500688
chr14	21693006	21693479
chr10	84007382	84008155
chr7	70899670	70900653
chr7	70947619	70948129
chr7	139874660	139875679
chr18	61575363	61576389
chr18	61632246	61633772
chr8	11730264	11730821
chr11	104107675	104109021
chr11	104115976	104117910
chr11	104118977	104119303
chr11	59944034	59944464
chr19	46920186	46921339
chr19	46922758	46924201
chr19	46929665	46930484
chr5	149519630	149520424
chr5	149620788	149622076
chr5	149719883	149721148
chr13	38165325	38166476
chr3	95820972	95821760
chr2	165912016	165912471
chr2	165930912	165932204
chr2	165941207	165942443
chr2	165949633	165951683
chr9	110984599	110985176
chr11	104139155	104140549
chr11	104150850	104151146
chr11	104158579	104160106
chr11	59952793	59955519
chr11	59995140	59996387
chr18	65759455	65759724
chr10	84163408	84164361
chr13	38718247	38718470
chr7	70996742	70997264
chr2	165959766	165961874
chr13	14181163	14181669
chr13	16103799	16104636
chr3	126399518	126400095
chr19	43953532	43954296
chr13	16314656	16315462
chr8	11796114	11796823
chr8	12486032	12488029
chr8	12666817	12667735
chr11	60009370	60010464
chr11	104426654	104429641
chr11	105123024	105123811
chr5	92927193	92928135
chr5	93111482	93112773
chr9	118590709	118591883
chr9	118594373	118595426
chr10	84314965	84315906
chr10	84412172	84413412
chr3	95897567	95898557
chr15	98126236	98126822
chr19	43970541	43971815
chr19	44001165	44002117
chr5	145079283	145079662
chr5	145096407	145100197
chr16	18555161	18555828
chr3	126767644	126768328
chr11	60040577	60043196
chr11	105173701	105174856
chr11	105214553	105215170
chr5	149801957	149802499
chr10	84926195	84928021
chr10	84943038	84944175
chr10	85083118	85083884
chr10	85292127	85292550
chr3	95916741	95917733
chr7	139919717	139921056
chr3	95936484	95938299
chr7	139923924	139926192
chr7	139929449	139930962
chr5	145120597	145121584
chr18	61643229	61645132
chr18	61646104	61647289
chr3	126959909	126961121
chr8	12768958	12769970
chr8	12779060	12780243
chr16	18586831	18587383
chr16	18626114	18626753
chr16	18629548	18630327
chr5	149827074	149828189
chr5	149831596	149832424
chr5	149890253	149891322
chr18	65854807	65856132
chr10	85748799	85751699
chr9	86453902	86454762
chr2	165969805	165975428
chr2	166021374	166023281
chr9	111042246	111042969
chr5	77550840	77551476
chr8	12855045	12856410
chr8	12873297	12874404
chr19	31825550	31826584
chr19	32231561	32232027
chr5	136197975	136199396
chr5	136200761	136201321
chr18	65857074	65858622
chr5	93191459	93193432
chr18	65903945	65905398
chr5	93198649	93199057
chr5	93201580	93204345
chr9	86794064	86795056
chr9	13367880	13368991
chr18	65965272	65965956
chr5	93214757	93215922
chr18	66084705	66085485
chr9	13507538	13508226
chr9	86900243	86900956
chr2	166028611	166030083
chr2	166068478	166069271
chr2	166167126	166168902
chr7	71144257	71145189
chr7	71166334	71168691
chr7	71177420	71178538
chr7	71184661	71185655
chr8	12987112	12988118
chr8	13036158	13036874
chr19	44355135	44355790
chr5	93225147	93225871
chr9	118613910	118615014
chr9	87634083	87635341
chr9	13893986	13896222
chr9	13962391	13963274
chr9	14200049	14200743
chr5	145132796	145133910
chr5	145141531	145142258
chr19	44406448	44408306
chr5	145564671	145565468
chr5	145658798	145659918
chr3	128869189	128869554
chr11	117169128	117170809
chr5	136368810	136369611
chr19	32298731	32300062
chr13	28861933	28863169
chr13	28962453	28963152
chr13	28965118	28966463
chr5	145664871	145665838
chr5	77575547	77576105
chr5	149945859	149947611
chr19	47302942	47304393
chr1	187017214	187017642
chr9	111925550	111926595
chr9	111973268	111974712
chr9	112080783	112081707
chr3	108115741	108117181
chr3	108131375	108131812
chr8	90806532	90807685
chr3	108166462	108168014
chr19	4604195	4604496
chr1	133963955	133964460
chr1	134022439	134023115
chr7	150749573	150750496
chr7	150876539	150877342
chr6	51689415	51689720
chr5	122581538	122582421
chr5	122585348	122587754
chr5	122611562	122612462
chr1	134024232	134026037
chr18	15146909	15148138
chr6	66222088	66223117
chr6	66851913	66853413
chr19	38470183	38471154
chr5	140211456	140213292
chr19	38578976	38580240
chr19	38607468	38608242
chr4	94879331	94880555
chr4	94953519	94955658
chr5	122620548	122622177
chr5	122697401	122698922
chr2	26483665	26485345
chr6	51717969	51718370
chr19	4878358	4879125
chr19	4942613	4943562
chr19	5012473	5013764
chr1	134054201	134056021
chr1	134183073	134184547
chr6	66915066	66917032
chr19	17304863	17305127
chr19	17314862	17316134
chr5	140338970	140339214
chr5	140383255	140384233
chr5	140499562	140501588
chr4	94983763	94986116
chr4	95051994	95052412
chr4	95150404	95151225
chr16	10557501	10558287
chr3	108524985	108525555
chr6	51955884	51956958
chr6	52318640	52319528
chr1	134230425	134230890
chr18	15148834	15149238
chr18	15158812	15160472
chr18	15221103	15224890
chr19	17428900	17429812
chr5	124786882	124787449
chr19	17911779	17912068
chr13	5627251	5627588
chr19	38661943	38662614
chr19	38663787	38668338
chr13	5821966	5822621
chr16	10676345	10677260
chr3	108683590	108684480
chr8	92480027	92481113
chr19	9114169	9115009
chr19	9122005	9122638
chr1	134454068	134455656
chr1	134462253	134462781
chr1	134521462	134523228
chr13	63208868	63210196
chr13	63223122	63224295
chr19	38695928	38696901
chr1	173237668	173238053
chr7	151298274	151298740
chr1	173354706	173355470
chr7	151355726	151356804
chr1	173356170	173356732
chr7	151361855	151362247
chr7	151392341	151394398
chr17	6164413	6166135
chr17	6168618	6169210
chr17	6174713	6175465
chrX	163819548	163820580
chr6	66921808	66922636
chr6	66941949	66943260
chr13	6041032	6042034
chr17	6180311	6181232
chr17	6212169	6212401
chr4	95413848	95414887
chr4	95512431	95513245
chr2	26897571	26898723
chr2	26952080	26952734
chr2	26975434	26976406
chr2	27030997	27031757
chr6	52913100	52914577
chr1	135078404	135079566
chr1	135173958	135174334
chr1	135178101	135178679
chr6	67007035	67008263
chr6	67019707	67020049
chr6	67063699	67064393
chr12	101566893	101567876
chr12	101640489	101641446
chr12	101653079	101653438
chr1	173399566	173401858
chr16	10703818	10704691
chr13	6472511	6473588
chr16	10843670	10844241
chr19	10087004	10087972
chr19	18176344	18176704
chr19	18727714	18729167
chr13	6634313	6635378
chr3	115330159	115331269
chr1	174129270	174130116
chr8	92871160	92872641
chr19	10099842	10100554
chrX	166435499	166436145
chr5	122881022	122881962
chr4	82206210	82206658
chr4	82218991	82219821
chr4	82337807	82338307
chr3	105378654	105379086
chr8	87124188	87124718
chr3	105429043	105430481
chr13	9116072	9116712
chr7	151752479	151753815
chr13	55272362	55274078
chr3	105445064	105445681
chr1	174219161	174219639
chr1	174361933	174362992
chr2	27070726	27071775
chr6	53446100	53447440
chr6	53474083	53474476
chr6	53506159	53506607
chr1	178725305	178725508
chr11	82658670	82659888
chr12	9066312	9067069
chr12	9244300	9244970
chr11	4105021	4106170
chr11	4176048	4176544
chr11	4198910	4199643
chr12	9262791	9263164
chr12	9310690	9311176
chr11	76725113	76725946
chr11	4202892	4203756
chr12	12260299	12261209
chr11	4519983	4520867
chr12	12308307	12309118
chr11	4529629	4530653
chr12	12319004	12320187
chr12	12362899	12363805
chr11	83881460	83882134
chr11	77190651	77191477
chr11	4571391	4572781
chr11	4618034	4618995
chr11	84577985	84578550
chr12	12687416	12688328
chr11	4737382	4737711
chr12	12945797	12946643
chr9	107808347	107809335
chr9	121127448	121128446
chr9	36681314	36682073
chr9	36701195	36701615
chr18	55407826	55408419
chr6	30193571	30193930
chr6	30198244	30198893
chr17	72150160	72150531
chr9	121465212	121467037
chr9	121498264	121498972
chr5	103853757	103855455
chr5	103887558	103888095
chr5	104049304	104050149
chr6	30296904	30298089
chr6	30319676	30320027
chr2	84680122	84681071
chr18	55523537	55524692
chr17	72218812	72219338
chr4	141173688	141174406
chr5	104084506	104084973
chr2	84722712	84723837
chr18	73631041	73631433
chr6	118933816	118934549
chr18	55799174	55800692
chr18	55921080	55921828
chr17	72624754	72625452
chr18	56207036	56207857
chr18	73858353	73858812
chr6	30522195	30523398
chr9	29095286	29097453
chr4	137890743	137891434
chr4	137897142	137901049
chr9	30041910	30043421
chr18	43627786	43629197
chr18	56611036	56612626
chr17	73229430	73230547
chr18	56673015	56673878
chr9	121728111	121729105
chr9	121798732	121800816
chr18	74133922	74135490
chr18	44121182	44121439
chr18	74181483	74183262
chr5	104267440	104268400
chr9	121964107	121966007
chr5	104275215	104275956
chr5	65429749	65430684
chr9	103631683	103632828
chr9	103653427	103654687
chr9	103763004	103763783
chr4	141225873	141227271
chr4	141237894	141239142
chr4	141305341	141306033
chr18	56721795	56722824
chr17	67118617	67119231
chr9	103827015	103828031
chr9	103833470	103834904
chr4	137987041	137987680
chr9	30284560	30285669
chr18	56838161	56838731
chr18	56843035	56844511
chr18	56875187	56876322
chr18	56896671	56897170
chr18	56922866	56923272
chr18	56939179	56940427
chr9	30526811	30527709
chr9	30530995	30531975
chr18	44581076	44581868
chr18	44618706	44619523
chr18	56948800	56949533
chr18	44631641	44633204
chr18	44743634	44745198
chr5	65571910	65573136
chr5	65806538	65807647
chr9	103939998	103940939
chr5	65845487	65847234
chr5	65848140	65849849
chr9	104955644	104955887
chr4	138557089	138557464
chr4	138647878	138649206
chr9	30723861	30724795
chr9	30726342	30728368
chr9	30729161	30730511
chr9	30771531	30773298
chr18	44815615	44816848
chr17	67429294	67430025
chr18	45801866	45803259
chr3	128989803	128990637
chr7	139984236	139985735
chr2	166173754	166174367
chr15	12404504	12405083
chr3	129094442	129095699
chr3	129236979	129237432
chr3	129293134	129294426
chr3	129323632	129324478
chr3	129352748	129353466
chr3	129416683	129418742
chr2	166184970	166186008
chr7	71193259	71195337
chr2	166237798	166238515
chr9	112129215	112130506
chr13	18993372	18993783
chr11	117341030	117341423
chr11	117343910	117344977
chr19	44532781	44534187
chr8	13338904	13339324
chr2	166254515	166255868
chr7	71940202	71940803
chr15	98502798	98503821
chr19	44585513	44586790
chr13	20210325	20212722
chr19	44955474	44956350
chr19	44973822	44975278
chr16	20476145	20478109
chr5	145714479	145715171
chr5	145720519	145722208
chr3	96132106	96132367
chr15	98558031	98558514
chr3	96218343	96218760
chr7	140078399	140079321
chr18	61836630	61839602
chr11	117402570	117403316
chr7	140202153	140203448
chr15	12447690	12448402
chr2	166258505	166259746
chr18	61866635	61867200
chr9	113890415	113891554
chr9	113934951	113935822
chr8	13486044	13487365
chr8	13506319	13508088
chr2	166273613	166274531
chr15	12483005	12483584
chr7	71986515	71986792
chr2	166351272	166351674
chr2	166430396	166431837
chr9	114490659	114491762
chr9	114493070	114493957
chr13	20478442	20479175
chr3	130814675	130815340
chr3	130839690	130840383
chr5	145749294	145749722
chr11	117504044	117506188
chr7	72508628	72509336
chr15	98602958	98603342
chr15	98633519	98634389
chr15	98637699	98639104
chr15	98651361	98651929
chr19	45154206	45154763
chr19	45309707	45310975
chr11	117554465	117555379
chr11	117557503	117558313
chr11	117571911	117572905
chr8	13538579	13539130
chr15	98724361	98727039
chr7	140225897	140226771
chr7	140255154	140256503
chr18	61948778	61950063
chr8	13657233	13658161
chr16	21246200	21246791
chr16	21248790	21249143
chr18	61992004	61993977
chr16	21256462	21257009
chr16	21318706	21321055
chr11	117590086	117592173
chr15	12544716	12545225
chr2	166528826	166529598
chr15	12637386	12638870
chr2	166538528	166540245
chr18	61994540	61995168
chr5	89059264	89060672
chr5	89078318	89079058
chr16	21358274	21359852
chr16	21361293	21362023
chr16	21364193	21364616
chr16	21421684	21421980
chr7	72558949	72560103
chr7	72631019	72631578
chr19	45507006	45507793
chr19	45554365	45554733
chr4	82930103	82930814
chr6	53554518	53556157
chr12	88264292	88265103
chr8	87228778	87229732
chr19	10351244	10352443
chr19	10354452	10356991
chr13	55572575	55573390
chr16	96627204	96628430
chr13	55596055	55597585
chr2	27166336	27167393
chr2	27182190	27182868
chr2	27183548	27184633
chr2	27228307	27229335
chr2	27236803	27237357
chr16	96629162	96629969
chr16	97079390	97080046
chr4	82999136	83000476
chr16	97577821	97579999
chr6	53562373	53562712
chr6	53770288	53771456
chr8	87267822	87269117
chr8	87273156	87274385
chr12	88282133	88284257
chr12	88315198	88315534
chr8	87275599	87276453
chr16	4647481	4648405
chr19	10466770	10468657
chr19	10472261	10473364
chr5	123035417	123036122
chr13	56077793	56078694
chr8	87308246	87309136
chr7	148406422	148408600
chr13	56185648	56185995
chr13	56205883	56207525
chr13	56210558	56213107
chr16	97641474	97641820
chr16	97973322	97974736
chr16	97984210	97985414
chr4	84169245	84170055
chr4	84186507	84187190
chr4	84191075	84191865
chr6	54424816	54425896
chr6	54480952	54481899
chr6	54490024	54490847
chr4	84320027	84322243
chr16	4650922	4651792
chr16	4652663	4653535
chr5	123102349	123102884
chr5	123143404	123144197
chr19	10529240	10530942
chr8	87338784	87339503
chr5	123224918	123225680
chr6	30624245	30625682
chr6	30908697	30909443
chr9	121983502	121983874
chr18	74223299	74225362
chr14	26359245	26361417
chr2	90419772	90421229
chr5	104454011	104454670
chr5	104464595	104465452
chr18	74602264	74602965
chr2	90711220	90712103
chr2	90727513	90728518
chr18	74684348	74685428
chr18	74705052	74705776
chr18	74711547	74712531
chr18	74800560	74801897
chr19	61084572	61086540
chr14	26420703	26423460
chr18	74883560	74885927
chr14	26433595	26435596
chr18	74887450	74890100
chr18	74893131	74893884
chr18	74943148	74943851
chr9	122219829	122220632
chr13	43687943	43688203
chr9	122745501	122746632
chr13	43829770	43830576
chr19	61124664	61124995
chr13	43879811	43880673
chr18	75120434	75122123
chr13	43957538	43958193
chr19	61302289	61303548
chr18	75198694	75199335
chr5	106159259	106161724
chr9	122795609	122796455
chr14	26492462	26494216
chr9	122832180	122832490
chr5	106226660	106227970
chr1	195037387	195038175
chr9	30793094	30794060
chr9	30926503	30928280
chr9	30964273	30965569
chr9	30982566	30983144
chr18	75307711	75308777
chr18	75324413	75325456
chr5	106234495	106236736
chr5	106238059	106238523
chr5	106246242	106247080
chr18	46105704	46106402
chr18	46435152	46435606
chr5	66481160	66481816
chr18	46518076	46518392
chr5	66541664	66542768
chr17	67514613	67515507
chr9	105643795	105644483
chr17	67525056	67525625
chr5	66723074	66723847
chr17	67550595	67550942
chr9	106128596	106129066
chr9	31790925	31792345
chr18	46564478	46565038
chr18	46575608	46577348
chr5	66736271	66737012
chr17	67570623	67571327
chr18	46647454	46648847
chr5	66829806	66831542
chr17	67639025	67641291
chr4	138821598	138823120
chr18	46772417	46773106
chr18	46794513	46796688
chr17	67672670	67673273
chr17	67689162	67690688
chr5	66918241	66919125
chr4	139046875	139047333
chr4	139048138	139049293
chr16	21524557	21525539
chr11	117739281	117740079
chr11	117784404	117785288
chr11	117791390	117792721
chr11	117796586	117798386
chr15	98807333	98808889
chr3	96585999	96586684
chr11	117835603	117837595
chr7	140285308	140286288
chr3	96839582	96840492
chr3	96848238	96849226
chr7	140306691	140307993
chr19	45616355	45616543
chr5	147061753	147062596
chr1	182799352	182801169
chr11	118014249	118014939
chr11	118021704	118023054
chr5	147561537	147562565
chr11	118036129	118036959
chr1	182866695	182867344
chr7	140368199	140369142
chr5	147589121	147589378
chr11	118188704	118189541
chr1	82968187	82968514
chr6	100145451	100146464
chr6	100156556	100157487
chr6	100248348	100249509
chr6	100273510	100274948
chr15	12693099	12693357
chr2	166807807	166808217
chr6	100276684	100277849
chr1	83116261	83117492
chr6	101173070	101173990
chr6	101192452	101193066
chr6	101200170	101201473
chr6	101221344	101222750
chr6	101228783	101230188
chr6	101261592	101262942
chr11	54523670	54524857
chr1	87647738	87648912
chr2	70869398	70871600
chr13	21845189	21846045
chr6	101283204	101284375
chr15	98862017	98864421
chr15	99053519	99055980
chr19	45731439	45731911
chr19	45750291	45751025
chr6	101294674	101295077
chr6	101311468	101312834
chr19	45769984	45771228
chr2	71202834	71203312
chr11	101312963	101314486
chr5	147765616	147766294
chr2	71505393	71506134
chr5	147783524	147783794
chr6	101505164	101505660
chr6	102323935	102325078
chr11	101329027	101330300
chr7	140954157	140955126
chr5	147834706	147835466
chr14	8858314	8860865
chr18	62339221	62340109
chr2	71566637	71567405
chr2	71582600	71583440
chr14	8940838	8942087
chr2	166945665	166947236
chr18	62894121	62894436
chr2	71617374	71617634
chr6	108059582	108060554
chr5	89465143	89465435
chr5	89564859	89565462
chr6	108061769	108062707
chr2	166959871	166960558
chr7	73343666	73345407
chr11	54701287	54702022
chr11	54707954	54708651
chr5	89568912	89569307
chr13	22473180	22473736
chr19	45934940	45936403
chr1	183861583	183862166
chr19	45985868	45986800
chr13	56623969	56624319
chr13	56650587	56652069
chr2	27713321	27714677
chr2	27741155	27742161
chr2	27791292	27792823
chr2	28074164	28075177
chr16	98178630	98179714
chr4	86008370	86009281
chr4	86027880	86029091
chr17	3135448	3136181
chr6	54649097	54649736
chr6	54762089	54762872
chr12	90708152	90709742
chr4	86317693	86318545
chr8	87426455	87427839
chr19	10772543	10774409
chr5	123428897	123429585
chr5	123459856	123460256
chr13	56713826	56715667
chr2	28134212	28134937
chr2	28301946	28302378
chr3	107063923	107065033
chr7	148703155	148705666
chr7	148797968	148798974
chr13	56867601	56868202
chr2	28373059	28373872
chr2	28377440	28378523
chr13	57752433	57753142
chr6	54801816	54802115
chr7	149072696	149073904
chr7	149085673	149086952
chr17	3326659	3326862
chr17	3397666	3398895
chr4	86330868	86331999
chr17	3464072	3464667
chr10	40956555	40957596
chr10	40960185	40961996
chr10	40968818	40969340
chr6	54938306	54939462
chr4	86525327	86527117
chr10	41175993	41176563
chr12	92922212	92923288
chr12	96933374	96934046
chr12	98755383	98755617
chr16	4978287	4979512
chr3	107159821	107160142
chr19	10844010	10845507
chr5	123479447	123479898
chr8	87643320	87643903
chr3	107308655	107309420
chr3	107320246	107321285
chr8	87897439	87898102
chr7	149209789	149210289
chr13	58012705	58013708
chr7	149229515	149230056
chr17	4498099	4498781
chr4	86787648	86788805
chr17	4945670	4946919
chr2	28853474	28854273
chr6	54959833	54960142
chr10	41200390	41201510
chr14	26544962	26545469
chr2	90952649	90953619
chr14	26557653	26559035
chr14	26562669	26563161
chr2	91000160	91001103
chr6	119327764	119328735
chr6	119342561	119343275
chr6	119359328	119361941
chr13	43998416	43999170
chr6	22149327	22150026
chr6	22220048	22221181
chr6	22305741	22306291
chr6	23788969	23789751
chr18	75442600	75444369
chr5	106252273	106253933
chr18	75478376	75479416
chr13	44119099	44120599
chr1	94741966	94742806
chr2	3074500	3075316
chr13	44132803	44133910
chr13	44138509	44139485
chr2	3335873	3336643
chr2	125626357	125627298
chr10	126517542	126518791
chr2	77145911	77146812
chr2	125691798	125692372
chr10	126557552	126558140
chr2	77156255	77157025
chr2	77179754	77180658
chr2	77229664	77230951
chr5	106652424	106654085
chr1	94981793	94982354
chr6	31222827	31224202
chr1	195103778	195105443
chr10	126559793	126560549
chr10	126583933	126585179
chr6	146619644	146620825
chr19	57071263	57072426
chr19	57091449	57092441
chr1	195244667	195245901
chr18	75522218	75523501
chr14	26625056	26625454
chr5	107081075	107081519
chr2	91357156	91357931
chr15	64080358	64082249
chr3	28604635	28605218
chr11	72818938	72820450
chr1	94996617	94998235
chr1	95073084	95073470
chr1	95240315	95240644
chr1	95320252	95321485
chr6	119455369	119456185
chr13	44180912	44182036
chr14	57676075	57677303
chr2	125890129	125890879
chr2	77273228	77275365
chr14	58143502	58144338
chr2	77356896	77357543
chr2	77399343	77401151
chr1	195275549	195276278
chr1	195481216	195482071
chr18	75593411	75595104
chr2	3665996	3666873
chr2	4022129	4022841
chr6	31363366	31363963
chr10	126762970	126764758
chr13	40955136	40956229
chr2	4147238	4149883
chr1	95565404	95565885
chr14	26670455	26670786
chr14	26672433	26674125
chr15	64169709	64170347
chr15	64188835	64190778
chr6	24607569	24608344
chr14	26688207	26689440
chr18	75643864	75644686
chr2	91506565	91507320
chr18	75648033	75649536
chr6	119463628	119464999
chr6	119465716	119466391
chr11	72944604	72945400
chr11	72957503	72960274
chr11	72979813	72981775
chr6	25270210	25270547
chr14	22281926	22282999
chr2	77626907	77627243
chr2	77628420	77629142
chr14	22376885	22378375
chr2	77701316	77702282
chr18	75675854	75676703
chr1	95592974	95594555
chr1	95612807	95613127
chr6	119476355	119477650
chr10	92712787	92714944
chr6	119493946	119495302
chr10	92717757	92718883
chr6	119522242	119523197
chr6	119545408	119545869
chr18	50104837	50105530
chr11	74217025	74219189
chr2	126710932	126713044
chr6	116930226	116931005
chr13	41008750	41009904
chr1	196519964	196521409
chr1	99548714	99550276
chr1	39291828	39292590
chr1	39339695	39342458
chr1	39343552	39345723
chr1	39474518	39474959
chr1	39486878	39487578
chr1	39506076	39506662
chr10	126848445	126850007
chr15	64204659	64205520
chr1	39520306	39521914
chr1	39523258	39523689
chr1	39727054	39727737
chr1	39777484	39778345
chr1	39810858	39811918
chr1	39814170	39814979
chr15	64341996	64342620
chr1	39815833	39817249
chr1	39869076	39869644
chr1	39902818	39904235
chr1	39963794	39965296
chr1	39965946	39966486
chr1	39969339	39970357
chr1	40009050	40009733
chr1	40021904	40022775
chr1	40025902	40026928
chr1	40642792	40643544
chr1	40670210	40671496
chr1	40707669	40708689
chr1	40724342	40724543
chr7	117431174	117432614
chr1	41024157	41025469
chr1	41189902	41191756
chr1	41612823	41613143
chr7	117774679	117775413
chr1	42286487	42287152
chr7	117781757	117782376
chr7	117798446	117800157
chr7	117811594	117812830
chr3	151956474	151957595
chr8	36215403	36215883
chr8	36274457	36275419
chr8	36280820	36281855
chr8	36296423	36297255
chr14	9159777	9160513
chr6	108225030	108225816
chrX	147247845	147249016
chr11	54709577	54710993
chr11	54716516	54718232
chr6	108227233	108227723
chr2	71776477	71777553
chr6	108281435	108281948
chr2	165039156	165043830
chr2	165122399	165122977
chr11	51868758	51870545
chr7	56789047	56790493
chr11	51877410	51878491
chr7	56800265	56801377
chr5	31118470	31119782
chr5	31126883	31128625
chr5	31135628	31136408
chr5	31151499	31152175
chr3	97105149	97105923
chr3	97432358	97433217
chr18	64652103	64653187
chr2	71819068	71820029
chr1	87934604	87936349
chr2	71939863	71940959
chr6	108293162	108294535
chr6	108347578	108348996
chr15	96884227	96886357
chr15	96897831	96898295
chr15	96902583	96904391
chr19	40623420	40624186
chr5	143678252	143679342
chr19	40662206	40662872
chr5	31152473	31153876
chr15	25507308	25508423
chr1	87949722	87950368
chr6	108379228	108380609
chr14	12504898	12505755
chr2	72039171	72040375
chr14	12521700	12522180
chr2	72068532	72070852
chr14	12597890	12598461
chr15	96905666	96906481
chr3	95036974	95037422
chr15	96952706	96953233
chr3	95039508	95040115
chr5	74567805	74569348
chr19	7215564	7216712
chr19	7217445	7218421
chr19	7220134	7226234
chr19	7232400	7232814
chr19	7239536	7240419
chr15	25575145	25575433
chr2	166992942	166994434
chr11	54736094	54736778
chr19	46001061	46001855
chr19	46100886	46101769
chr6	108413645	108415204
chr6	108426753	108427463
chr6	108441374	108442267
chr6	108443753	108444792
chr11	99127175	99127678
chr11	99180579	99180779
chr5	74595773	74596955
chr5	74597528	74598261
chr5	121701252	121702235
chr5	74625912	74627162
chr9	109743867	109744363
chr3	97453030	97453492
chr3	97487951	97489292
chr1	183982583	183983244
chr1	183984782	183985618
chr1	184028859	184029697
chr6	108484134	108487353
chr1	184036596	184039162
chr1	184040661	184042184
chr14	12657518	12658317
chr2	72130622	72130854
chr14	12680314	12681753
chr11	100174766	100175050
chr15	7090418	7091802
chr15	7108996	7109626
chr19	40947610	40948327
chr5	143822754	143824087
chr18	24894479	24895594
chr11	101633609	101634246
chr18	64859316	64860795
chr1	88334166	88335390
chr6	108488873	108490001
chr18	65009541	65010234
chr10	80306585	80308371
chr6	108654038	108656241
chr2	165293487	165294359
chr7	56825970	56827677
chr18	60802596	60803561
chr5	74660538	74664060
chr5	74668664	74670476
chr5	74681224	74681998
chr18	60823488	60824181
chr5	31296893	31297839
chr5	31302230	31303099
chr15	25643015	25643842
chr15	25698224	25698630
chr15	25699290	25699877
chr2	167022116	167023220
chr15	25795429	25796953
chr10	80399005	80399542
chr7	57014614	57014966
chr7	57033455	57034190
chr11	52047744	52048435
chr7	57060133	57060521
chr7	57088611	57088990
chr11	52095999	52097211
chr11	52160068	52160426
chr5	74687491	74688901
chr5	74711623	74712250
chr9	71510927	71511953
chr9	71564603	71565631
chr19	7367190	7368289
chr2	167057583	167058587
chr2	167065651	167066428
chr11	54876423	54876893
chr1	184079102	184079453
chr1	184356418	184358063
chr1	184384692	184386210
chr6	112195549	112196193
chr2	72473832	72474492
chr15	97012856	97013568
chr15	97181166	97181664
chr3	95255228	95256227
chr5	143827784	143828135
chr15	99414293	99415328
chr1	88730563	88732454
chr6	112227409	112228030
chr10	80428486	80430177
chr10	80433692	80435418
chr3	95302364	95302658
chr5	143901660	143902281
chr5	122135814	122137091
chr5	122140725	122141218
chrX	149203569	149204541
chr11	101798492	101798814
chr13	23807718	23809706
chr1	184422993	184423709
chr1	89094874	89095760
chr15	7430039	7431172
chr15	7641315	7642863
chr15	7759685	7761360
chr15	7806746	7809007
chr18	60839609	60840675
chr18	60846968	60848155
chr1	89169231	89170623
chr1	184599768	184600751
chr1	184612655	184613043
chr1	184836133	184836744
chr1	184837400	184839340
chr1	184884489	184885296
chr1	184913334	184913922
chr5	75009387	75010736
chr5	75017488	75018714
chr4	86857075	86857826
chr4	87294392	87294750
chr4	87296362	87297302
chr12	81188652	81189551
chr4	87451987	87452478
chr15	102140761	102141438
chr8	84384646	84385520
chr3	104193208	104195012
chr10	41272971	41273635
chr10	41314770	41315666
chr10	41316727	41319345
chr7	123311711	123311980
chr7	123329819	123330726
chr15	82171622	82172502
chr8	84610136	84611094
chr7	144277438	144278247
chr16	94718892	94720142
chr12	99964654	99965740
chr19	10982830	10984780
chr19	10988545	10989576
chr3	107533932	107534647
chr11	107274713	107275376
chr3	79346471	79347602
chr7	123364401	123365616
chr4	76094576	76096422
chr4	76106665	76108033
chr15	102185686	102186541
chr19	11026494	11027714
chr5	123751442	123752788
chr5	123826661	123827567
chr7	149274635	149275190
chr7	149326804	149327729
chr15	82886972	82888247
chr3	79368849	79369789
chr3	104369208	104370211
chr8	85417266	85417691
chr3	104413279	104415244
chr8	85421600	85422525
chr13	58459991	58460799
chr13	58486184	58486779
chr13	58516390	58517372
chr13	58596578	58597581
chr2	29036582	29037487
chr17	5004072	5005802
chr4	87456327	87457156
chr17	5006707	5009511
chr4	87815535	87816382
chr15	82985629	82986549
chr7	123429738	123431540
chr3	104416781	104417070
chr8	85441250	85442009
chr7	146046997	146049441
chr13	59471372	59471969
chr2	29046741	29048333
chr2	29077582	29078444
chr2	29105256	29109167
chr16	5431756	5432756
chr16	7066910	7068160
chr7	123658988	123659513
chr7	123667622	123668705
chr7	123690836	123692082
chr3	79683197	79683656
chr16	94809260	94810268
chr4	81266771	81267863
chr4	81409770	81410917
chr4	81475711	81476684
chr12	100458839	100459431
chr12	100465066	100465952
chr12	100485317	100486506
chr16	7080461	7082159
chr3	107589755	107591020
chr3	79704133	79705341
chr7	124523801	124524723
chr4	81602872	81603424
chr15	102340647	102341300
chr8	85463609	85464568
chr2	29115707	29117263
chr13	59609535	59610287
chr2	29214544	29215276
chr3	107619017	107619893
chr8	88395374	88396124
chr2	29269122	29270127
chr2	29293673	29294924
chr2	29318237	29320059
chr10	41568974	41569444
chr7	149647615	149648482
chr17	5068693	5069844
chr15	83270702	83271609
chr3	104516898	104517543
chr7	146095530	146096144
chr7	146320794	146322199
chr12	100506882	100508594
chr12	100532581	100533287
chr19	12550148	12550383
chr17	5072634	5072960
chr17	5074771	5075529
chr17	5078117	5078994
chr17	5081147	5083033
chr4	88286790	88287012
chr3	80840368	80841651
chr15	83299772	83300465
chr16	94843978	94844458
chr16	94974368	94974784
chr4	81811648	81812717
chr13	59776712	59777493
chr13	59954771	59955629
chr10	41673126	41674567
chr11	88706570	88707362
chr7	126096914	126098034
chr7	126119489	126121017
chr13	44449202	44449844
chr13	44450991	44451863
chr13	44457272	44459480
chr13	44462928	44463927
chr2	4181145	4182271
chr13	44478618	44479777
chr13	44499662	44500201
chr13	41015251	41017151
chr6	28538269	28538996
chr14	22379474	22380856
chr1	99898852	99899952
chr1	99952447	99953588
chr1	196926873	196927440
chr10	12242111	12242343
chr11	74292777	74293280
chr14	58355080	58356795
chr14	22412023	22412864
chr14	58482490	58483295
chr14	22538746	22540194
chr14	22640432	22640766
chr6	117180634	117181267
chr10	3111414	3111768
chr10	3157167	3157723
chr10	3163178	3164420
chr2	91763926	91764269
chr10	127032693	127035162
chr10	127073364	127074266
chr15	64453221	64454637
chr15	64754158	64755007
chr6	117276844	117281081
chr6	117339842	117341446
chr6	117365145	117366116
chr6	119663569	119664054
chr1	107861262	107862010
chr2	91797167	91797833
chr1	107879595	107880533
chr6	119790716	119790933
chr15	66332269	66332770
chr15	66506360	66508024
chr11	74324619	74326262
chr6	28571513	28572798
chr6	28585171	28587795
chr6	119832533	119834262
chr1	107895124	107895689
chr1	107959946	107961475
chr13	44514793	44515577
chr2	4349371	4349938
chr11	74347302	74348404
chr6	28654314	28657530
chr6	28782103	28783619
chr6	28833703	28834331
chr4	55887751	55888560
chr2	4381247	4382685
chr4	56721007	56721964
chr2	4424944	4426357
chr2	79553484	79554370
chr14	22801826	22802471
chr11	74561212	74563066
chr11	74570000	74570653
chr2	80417139	80417425
chr6	117554654	117557918
chr8	74031307	74032236
chr4	56734238	56735659
chr6	32291168	32294031
chr6	32314391	32315390
chr10	12539469	12540015
chr11	74661245	74661717
chr11	74675691	74676256
chr13	41595417	41596936
chr4	56881125	56882232
chr8	74191382	74192988
chr2	91824536	91825287
chr2	91867773	91868431
chr19	57327429	57328130
chr6	28855950	28857179
chr8	74203041	74203858
chr16	85169148	85170119
chr4	56937820	56938283
chr14	27855638	27856304
chr8	36300158	36300720
chr10	127699233	127700109
chr6	29120144	29120781
chr6	29220384	29221439
chr3	152002957	152003560
chr4	57154914	57155684
chr4	57204493	57204834
chr8	36495335	36497408
chr8	36639164	36640626
chr7	118046438	118047800
chr7	118049400	118050275
chr7	118079238	118080401
chr16	32710763	32711540
chr3	152389849	152390349
chr15	78371797	78373094
chr15	78377982	78379021
chr15	78505162	78507999
chr8	36836875	36837701
chr7	118133276	118134770
chr3	154353860	154355898
chr3	154473232	154473744
chr3	154479506	154480495
chr15	78646140	78646856
chr8	37343583	37344622
chr3	57926082	57926696
chr14	12937245	12937761
chr2	72578630	72579508
chr14	13654520	13655254
chr10	80499694	80500066
chr5	31397246	31398804
chr18	24972714	24973376
chr11	55030780	55032058
chr11	55109551	55110513
chr11	55178136	55178957
chr14	14766102	14766496
chr15	7825477	7826597
chr15	7827552	7828248
chr9	71872260	71873202
chr9	72031301	72032101
chr15	99637619	99638131
chr15	99665306	99666002
chr1	185881309	185882228
chr11	52374387	52375215
chr19	42066191	42067311
chr5	122150143	122151329
chr1	180642900	180643989
chr19	7626266	7627031
chr15	27255469	27256483
chr11	55179659	55181176
chr1	89781988	89782443
chr1	89829498	89830266
chr1	186453128	186454474
chr10	80695796	80696580
chr3	95532752	95533325
chr15	7881249	7882794
chr19	42077853	42081156
chr1	180768611	180770848
chr1	180971530	180972813
chr1	180990851	180992865
chrX	153929283	153929885
chr1	186531243	186532147
chr1	90378822	90379947
chr14	17032698	17033916
chr1	90824343	90824858
chr1	90825877	90826336
chr1	186648094	186648940
chr10	80794334	80794765
chr15	8569288	8570208
chr2	165750340	165751065
chr2	165770374	165771018
chr5	75084403	75085014
chr5	75090102	75090911
chr5	31597821	31598214
chr11	102106271	102107180
chr11	102115137	102115754
chr11	102128159	102130278
chr1	186810369	186811422
chr1	186822690	186823515
chr10	80819487	80820826
chr1	90975027	90976280
chr1	90977099	90978395
chr14	17277412	17278193
chr14	17312229	17313834
chr11	52577760	52579558
chr11	52693583	52694836
chr11	52790848	52792054
chr19	42109985	42110618
chr5	31904785	31905396
chr19	42142965	42143801
chr11	102307236	102308766
chr1	91004951	91006897
chr1	91013675	91014205
chr8	126512577	126513748
chr8	126525993	126527596
chr10	81031361	81032376
chr1	181076221	181078117
chr1	181212013	181212826
chr1	181364814	181365398
chr19	7635596	7637560
chr1	181418347	181418969
chr19	7654885	7655899
chr11	58024426	58025028
chr8	126593935	126595284
chr4	40751801	40753199
chr8	126629898	126630722
chr8	126704429	126709384
chr15	10106861	10108360
chr18	61106957	61107850
chr5	122407652	122408724
chr18	25032953	25033430
chr18	25113451	25114115
chr11	102442591	102444113
chr11	102498177	102498583
chr11	102505114	102505750
chr11	102600852	102601220
chr11	58311977	58312662
chr8	55633953	55634425
chr8	55728764	55728962
chr10	82223749	82224449
chr8	126762298	126765448
chr8	126767774	126768726
chr10	82269433	82270351
chr10	82351978	82353023
chr10	82447687	82448476
chr11	52879010	52880653
chr11	53070995	53071934
chr11	53239024	53239775
chr15	97768733	97769913
chr15	97856627	97858385
chr19	42362468	42363276
chr19	42506308	42506940
chr1	181492721	181493425
chr5	122411445	122413492
chr5	122435749	122436444
chr6	72620894	72622025
chr5	131783376	131783990
chr4	40781587	40782156
chr10	82542697	82543085
chr10	82800276	82800820
chr9	77768674	77769502
chr9	77774440	77778072
chr9	77802434	77803003
chr15	97908420	97909190
chr11	100680365	100681217
chr1	137690111	137692080
chr1	137696929	137698053
chr1	137708765	137710398
chr1	137715053	137715593
chr5	132090474	132091269
chr6	72663958	72665302
chr6	72690336	72691190
chr6	72698303	72699388
chr6	72705328	72705907
chr17	35988551	35989775
chr17	36010572	36011202
chr11	100694501	100695968
chr15	11834986	11836882
chr15	11843980	11844309
chr11	53255472	53255794
chr8	126798768	126799841
chr4	88513905	88514253
chr4	88583695	88584870
chr12	81634589	81635372
chr12	81663533	81665038
chr12	77752637	77753188
chr12	77770949	77772223
chr12	77779815	77780514
chr10	41717363	41718000
chr10	41756800	41757455
chr12	100568809	100569451
chr12	81675192	81675936
chr16	7129657	7130371
chr16	7140941	7141332
chr16	7150475	7150992
chr3	83249802	83251596
chr7	126124441	126125445
chr15	102669587	102670859
chr3	104580109	104580467
chr15	102924126	102925422
chr13	60050003	60050977
chr13	60094121	60095044
chr13	60388167	60389439
chr10	41802342	41803416
chr10	41821015	41821725
chr10	41828102	41828963
chr10	41897575	41898200
chr16	7279602	7280498
chr3	83282848	83284532
chr7	126137611	126139297
chr3	83645150	83645753
chr7	127008988	127010186
chr3	104763769	104764460
chr3	104770696	104771044
chr11	105435512	105436175
chr12	100601814	100603081
chr10	41930727	41931627
chr3	107755596	107756630
chr11	107893834	107894679
chr11	107895478	107896354
chr11	107922484	107923993
chr7	127030902	127032151
chr15	83425149	83425498
chr3	83671520	83672380
chr3	104798406	104798860
chr11	105797170	105798765
chr11	105820678	105821444
chr10	41939786	41942719
chr7	150114880	150116284
chr7	150217616	150219110
chr17	5131621	5133203
chr4	88622964	88623608
chr15	84047031	84047720
chr3	83788303	83788906
chr11	89006198	89007112
chr11	89048342	89049000
chr15	84051623	84053043
chr16	95338907	95339630
chr10	42595319	42595987
chr10	42741051	42742033
chr10	42762388	42764413
chr10	42800288	42801343
chr10	42840985	42841440
chr10	42875028	42875456
chr17	5220435	5222376
chr4	89094583	89095187
chr12	81699221	81700329
chr12	81704169	81705130
chr3	83852602	83852835
chr3	83994277	83994656
chr9	45769727	45770362
chr12	81816393	81817497
chr15	84131764	84133005
chr15	84141032	84141923
chr15	84253431	84255202
chr15	84260596	84261819
chr15	103051386	103052017
chr8	97933088	97933725
chr8	97956048	97956433
chr8	98012266	98013099
chr9	45858338	45858742
chr9	45954453	45955637
chr8	89358663	89359960
chr15	84335218	84336052
chr16	8795715	8796866
chr11	90213496	90214359
chr11	90250544	90252183
chr15	84469687	84471172
chr15	84527008	84528585
chr8	98214506	98215632
chr17	83468137	83469602
chr17	83473637	83474838
chr3	107988666	107990025
chr11	107976063	107976687
chr11	108006452	108008683
chr11	108009535	108013075
chr11	90539766	90540579
chr11	90548573	90549480
chr11	93991320	93992015
chr7	146524954	146525505
chr17	83476886	83478612
chr17	83522188	83523262
chr17	13671544	13673241
chr4	148687447	148688332
chr17	13813639	13815384
chr11	108041320	108043060
chr11	108070074	108071149
chr7	150322277	150323076
chr11	94202076	94204552
chr11	94207110	94209109
chr7	146583793	146584669
chr17	13816890	13817525
chr9	45971717	45972516
chr17	13822425	13823368
chr11	94355917	94356826
chr11	94458576	94459183
chr11	94537917	94539096
chr10	93110090	93111782
chr13	44721588	44722639
chr13	44832745	44833264
chr13	44842334	44842897
chr14	24409407	24410088
chr14	24696189	24697523
chr2	83550085	83550593
chr14	24760889	24762668
chr14	25025414	25027384
chr2	83599189	83600416
chr6	118080086	118080619
chr2	84181046	84181241
chr6	118259817	118260599
chr6	118274844	118275807
chr10	85767281	85767796
chr4	57215289	57216582
chr17	66698684	66702793
chr17	67665629	67667707
chr9	118739661	118740687
chr9	118771359	118773059
chr9	118775570	118776493
chr9	118795726	118797562
chr9	118834220	118835368
chr6	118428960	118429856
chr9	118846092	118847031
chr13	41765335	41766908
chr13	41790200	41790710
chr13	41800625	41801321
chr13	41843599	41845196
chr8	74831979	74833001
chr4	57279276	57279835
chr4	57281279	57282483
chr7	119268986	119272553
chr9	118860441	118862117
chr9	118867709	118868649
chr5	150214327	150214916
chr13	41899816	41900206
chr5	150330636	150331182
chr5	150369324	150370102
chr10	5725066	5725763
chr16	87329735	87330184
chr16	87335122	87335743
chr4	57331556	57332643
chr4	57446801	57448050
chr5	93423931	93424632
chr5	93455103	93456283
chr5	93578630	93579719
chr9	119010748	119011571
chr10	5963104	5963640
chr10	5969304	5970575
chr8	74934637	74935625
chr16	87473905	87474195
chr14	28434307	28435878
chr16	87501611	87502192
chr16	87610711	87612580
chr10	12683307	12684552
chr14	25320032	25320581
chr14	27889189	27890571
chr5	151034491	151035312
chr5	151061550	151062558
chr14	25363892	25364483
chr14	27936742	27937085
chr2	84439203	84439993
chr14	27958047	27959784
chr4	57594789	57595357
chr10	18137791	18139477
chr5	66963391	66965426
chr5	96865174	96865446
chr14	27984668	27985313
chr5	96883217	96884349
chr6	118738500	118739210
chr5	96942245	96943054
chr9	119334522	119335351
chr10	85961081	85961896
chr10	86217762	86220490
chr13	42204192	42204505
chr16	87706108	87707879
chr4	57613910	57615364
chr4	57619691	57620958
chr4	57624058	57626106
chr18	54102786	54104263
chr4	140802161	140804145
chr9	119390304	119390939
chr19	47616867	47617380
chr19	57441688	57442367
chr5	151130705	151132171
chr13	45028124	45028737
chr19	57547197	57548685
chr13	45034620	45035369
chr2	4933585	4934217
chr6	29798732	29800459
chr12	72212314	72212836
chr12	72410450	72412636
chr5	151192637	151193187
chr19	57999774	58000969
chr18	68105048	68105985
chr5	97058915	97059764
chr10	12697462	12698112
chr2	5378740	5379665
chr8	75659068	75660568
chr8	75702425	75702893
chr16	89617133	89618668
chr8	37520490	37521585
chr15	78680397	78681737
chr18	68206821	68207566
chr9	119427976	119428904
chr10	12829582	12830144
chr9	119521302	119521945
chr14	25433745	25434963
chr14	25453809	25454659
chr14	25564495	25565807
chr14	25567139	25568611
chr14	28033481	28033923
chr14	25570222	25571759
chr16	89992003	89992381
chr16	90143199	90144806
chr16	90199409	90200163
chr7	118326758	118326981
chr7	118359989	118360306
chr16	32947346	32948040
chr16	33178296	33179136
chr14	28102013	28103010
chr10	93574259	93574780
chr19	47982978	47984898
chr10	93592837	93593004
chr4	57770362	57771220
chr4	57785360	57786231
chr12	72580466	72581527
chr12	72595917	72596555
chr12	72813076	72814111
chr15	78687559	78688624
chr15	78729183	78731005
chr3	58483412	58485166
chr5	151396116	151397407
chr18	68276510	68280209
chr18	68309169	68309679
chr5	97368413	97370284
chr10	13031388	13032604
chr15	78818978	78819512
chr8	37705097	37706375
chr7	118513483	118514458
chr10	93948662	93950239
chr8	37707759	37708500
chr3	58831382	58832535
chr7	118672207	118673170
chr3	58917769	58918333
chr3	59008329	59010120
chr7	118774696	118775497
chr7	118818552	118819851
chr10	93956977	93958728
chr13	45606005	45609144
chr10	13533576	13534180
chr16	33336712	33338204
chr3	157426830	157427550
chr8	37790180	37792799
chr8	37795059	37796238
chr7	118853657	118855690
chr7	119116721	119119191
chr16	33576425	33577573
chr16	33591784	33592767
chr9	77811498	77812108
chr18	25792572	25793078
chr18	25801850	25802988
chr18	25912617	25912864
chr5	32319725	32320922
chr5	32337166	32338062
chr6	72828761	72829758
chr5	132304976	132305612
chr17	46802060	46802396
chr5	35296334	35300822
chr5	35305105	35307539
chr11	53270502	53271122
chr11	53276805	53277253
chr11	53340844	53342328
chr11	100785766	100786817
chr1	137726828	137728197
chr5	132573597	132574848
chr5	132705411	132706288
chr6	72876721	72877400
chr4	127096864	127097185
chr8	126814403	126815477
chr9	77989109	77989653
chr5	35331267	35335638
chr8	126817234	126818569
chr9	78016103	78016796
chr5	35345724	35347042
chr11	53399184	53399474
chr11	53495846	53497390
chr1	137757786	137759808
chr1	137913968	137915058
chr1	138036705	138037310
chr18	28032600	28033355
chr18	28993761	28994677
chr18	29010750	29011913
chr6	81873707	81874228
chr19	25382677	25383779
chr5	132875629	132876678
chr8	126847010	126847469
chr8	126871718	126872327
chr5	35347768	35348917
chr5	35358993	35363468
chr5	35364485	35364931
chr9	78039565	78040300
chr11	100889471	100890500
chr19	25459584	25461100
chr6	81915455	81915925
chr9	78060081	78060569
chr4	128105701	128106506
chr9	78195668	78196734
chr11	53793372	53793779
chr11	53832694	53833020
chr4	19935234	19935730
chr1	138409050	138410025
chr1	139484580	139485652
chr8	124705304	124706044
chr2	32341943	32342641
chr2	32383058	32383599
chr19	25477643	25478807
chr16	43518616	43519465
chr9	78336485	78337275
chr18	35641945	35642741
chr18	35647972	35649178
chr17	47134536	47135135
chr11	100995262	100996231
chr11	53881637	53882780
chr11	53919675	53920580
chr11	101001709	101002555
chr8	124722228	124723239
chr8	124768336	124770208
chr1	140808224	140809258
chr8	124776346	124777985
chr5	133006106	133006680
chr5	133018443	133020342
chr19	25494439	25494965
chr19	25521416	25522266
chr8	127053902	127054886
chr4	41206691	41207843
chr18	35708017	35708822
chr8	127110093	127110796
chr9	78359813	78362794
chr5	35531140	35532654
chr5	35901048	35902837
chr11	54027895	54028488
chr11	54117005	54118033
chr11	54125883	54127012
chr8	47514326	47515694
chr8	124810554	124811203
chr8	124811715	124812511
chr8	124814718	124816273
chr1	145727949	145728650
chr5	134132457	134133319
chr13	74304004	74305178
chr13	74358010	74359044
chr2	32402553	32405626
chr8	60094165	60094435
chr17	37064431	37064878
chr9	79562247	79563590
chr9	79566085	79566972
chr6	71301324	71302532
chr6	71364087	71366457
chr8	124852871	124855168
chr8	124868210	124870039
chr1	145959891	145961243
chr8	124892739	124893961
chr1	151808057	151808363
chr1	152673474	152674529
chr1	152725461	152726128
chr1	152818039	152819382
chr1	152823613	152824273
chr17	37079405	37080371
chr4	128433166	128433533
chr4	128470324	128471526
chr18	35785516	35787164
chr5	35942896	35943642
chr18	35831579	35832457
chr5	35974954	35976251
chr5	125550230	125552203
chr5	125553688	125555773
chr5	125556622	125557195
chr5	125586398	125587175
chr17	33888267	33888708
chr3	120965336	120966535
chr6	82756637	82757630
chr4	128602470	128602916
chr4	128634564	128635499
chr16	43582284	43583296
chr4	128638754	128639595
chr5	36029229	36030603
chr17	47664309	47665249
chr5	36033385	36034300
chr6	71665041	71665567
chr6	71672828	71673744
chr5	125628658	125629869
chr5	125631024	125632362
chr4	123338319	123339883
chr8	95744804	95745977
chr4	123363668	123365074
chr3	121121394	121122737
chr19	26807999	26808635
chr19	26824351	26824845
chr19	26932759	26933901
chr19	26965613	26967889
chr6	71686485	71687838
chr2	30688666	30690607
chr6	71706507	71707381
chr6	71754926	71756198
chr4	123487519	123488362
chr4	31217425	31218761
chr8	63721813	63722561
chr17	37183037	37183365
chr16	36828384	36829276
chr4	31729566	31730506
chr8	124984344	124985253
chr4	32024030	32025217
chr4	32032807	32033608
chr7	150340074	150341254
chr17	5228090	5229174
chr17	5238233	5238825
chr17	5257864	5259070
chr17	5260691	5261702
chr12	78293682	78295290
chr4	98175674	98176184
chr4	98177562	98178625
chr4	98281040	98281637
chr8	98761577	98762381
chr8	98769832	98770340
chr8	105091819	105092261
chr11	94848674	94849542
chr3	104861808	104863333
chr3	104902760	104903500
chr17	83722737	83723523
chr17	13869022	13870732
chr17	13879152	13881474
chr17	14016168	14017078
chr16	10286292	10287302
chr16	10297789	10298421
chr11	108074717	108075379
chr11	108084757	108086146
chr11	108196979	108197318
chr6	42312062	42313384
chr17	5848966	5849739
chr6	43286976	43287680
chr8	86546326	86547773
chr17	14042262	14043159
chr9	46707384	46708741
chr9	46721011	46722789
chr4	98787089	98788179
chr17	5872476	5872775
chr12	81985992	81986602
chr12	82363816	82365511
chr7	146637622	146639538
chr7	146722242	146722767
chr8	106397763	106398391
chr16	10299728	10300937
chr16	10452326	10453207
chr16	10530527	10530965
chr16	95903974	95904767
chr4	82098764	82099572
chr16	95950393	95951338
chr17	84122436	84122794
chr17	84217797	84218664
chr17	84294534	84295575
chr17	14417531	14418102
chr17	14517825	14519996
chr11	108286631	108287153
chr11	108612504	108616959
chr11	108856600	108857380
chr6	48518662	48519456
chr12	80052624	80053863
chr12	80072054	80074276
chr9	47397380	47398749
chr9	47424448	47425099
chr12	82882401	82882818
chr12	82904473	82905048
chr12	82907790	82908623
[truncated: 6,163 more rows]

## Sheet: downregulated (DOWN) genes
##392 down-regulated Genes
gene_symbol	RefSeq_name	FC(CKO/WT)	log2FoldChange	pvalue	padj
2310039L15Rik	NR_045337	0.118	-3.08314	9.86568e-05	0.00208785
Sun3	NM_001290519	0.143	-2.80591	1.08121e-05	0.000311361
AI506816	NR_015554	0.191	-2.38836	3.39797e-10	2.49367e-08
Mettl21e	NM_207281	0.196	-2.35107	0.00084696	0.0123912
Kcnv2	NM_183179	0.229	-2.12658	2.44933e-13	3.0394e-11
Cngb3	NM_013927	0.237	-2.07704	4.38176e-09	2.67e-07
2310015D24Rik	NR_037997	0.24	-2.05889	0.00196239	0.0246881
Amy1	NM_007446	0.261	-1.93788	5.16774e-08	2.57444e-06
Gm13154	NM_001014397	0.282	-1.82623	0.0001511	0.00294645
Trim14	NM_029077	0.298	-1.74662	0.00643529	0.0322108
Scn2b	NM_001014761	0.301	-1.73216	0.00355327	0.0392413
Cidec	NM_001301295	0.302	-1.72738	0.0178114	0.0300139
Hnmt	NM_080462	0.305	-1.71312	7.06376e-08	3.40443e-06
Cxcl14	NM_019568	0.305	-1.71312	0.000723043	0.0107964
Cfap61	NM_175280	0.324	-1.62593	0.00895101	0.0492356
Tusc5	NM_177709	0.33	-1.59946	5.85304e-05	0.00133602
Ubxn10	NM_001285928	0.334	-1.58208	9.34077e-05	0.00199221
3110052M02Rik	NM_001166497	0.338	-1.5649	0.00115299	0.0158652
Hs3st5	NM_001253355	0.338	-1.5649	0.0194464	0.0377496
Cmbl	NM_181588	0.345	-1.53533	2.2324e-12	2.36219e-10
Slc2a9	NM_001012363	0.35	-1.51457	0.0136084	0.047948
2610307P16Rik	NR_045053	0.358	-1.48197	0.00801796	0.0433055
D2hgdh	NM_001310767	0.361	-1.46993	0.000286958	0.00504115
Gm28979	NR_110509	0.362	-1.46594	0.00117587	0.0161313
Gm6086	NM_001039219	0.37	-1.4344	0.0057894	0.0272232
Iqsec3	NM_001033354	0.37	-1.4344	0.00284368	0.0333187
Gpt	NM_182805	0.373	-1.42275	1.1453e-07	5.2461e-06
Slc5a1	NM_019810	0.382	-1.38836	0.0183523	0.0327417
Pydc4	NM_001177349	0.382	-1.38836	0.0184436	0.0329225
Mttp	NM_001163457	0.384	-1.38082	1.47e-05	0.000406184
Rgcc	NM_025427	0.384	-1.38082	9.59454e-05	0.00203996
Wdfy2	NM_175546	0.385	-1.37707	0.00276598	0.0326323
4831440E17Rik	NR_030700	0.392	-1.35107	0.0152105	0.0452851
Zik1	NM_009577	0.396	-1.33643	0.00496031	0.0209944
Slf1	NM_134071	0.399	-1.32554	8.3301e-08	3.96188e-06
Atp8b5	NM_177195	0.401	-1.31833	4.91167e-05	0.00115395
Uckl1os	NR_027289	0.401	-1.31833	0.00112342	0.0155209
Emid1	NM_080595	0.401	-1.31833	0.0174144	0.0276622
Rnaset2a	NM_001083938	0.404	-1.30757	0.000223012	0.00408058
Pfkfb1	NM_008824	0.408	-1.29336	1.15646e-05	0.000332329
Pde4c	NM_201607	0.411	-1.28279	3.88969e-05	0.000946421
P2ry14	NM_001287121	0.412	-1.27928	0.000308771	0.0053351
Ube2t	NM_026024	0.414	-1.2723	0.0183027	0.0479512
H2-Q7	NM_010394	0.416	-1.26534	0.000215823	0.00397033
Cnga3	NM_001282010	0.416	-1.26534	0.0161429	0.0488033
Il2ra	NM_008367	0.42	-1.25154	0.0166557	0.0409019
Zfp879	NM_173387	0.425	-1.23447	0.0113114	0.0338603
Plin3	NM_025836	0.43	-1.21759	1.5712e-11	1.40176e-09
Rhd	NM_011270	0.431	-1.21424	0.0069714	0.0363133
Cenpo	NM_134046	0.432	-1.2109	0.0137108	0.0484051
Ctla4	NM_009843	0.433	-1.20756	0.00950544	0.0223883
Rasl2-9	NM_009028	0.436	-1.1976	0.00318291	0.0363522
Ung	NM_001040691	0.44	-1.18442	5.65437e-05	0.00130375
Lix1	NM_025681	0.441	-1.18115	0.00846566	0.0462146
Endog	NM_007931	0.448	-1.15843	0.00237624	0.0289087
Grm1	NM_001114333	0.453	-1.14242	2.35051e-07	1.00895e-05
Cwc22	NM_030560	0.455	-1.13606	4.713e-06	0.000151728
Ddit4	NM_029083	0.455	-1.13606	0.00011732	0.00242639
Pkia	NM_008862	0.459	-1.12343	1.80677e-09	1.15245e-07
Fap	NM_007986	0.459	-1.12343	0.00318515	0.0363522
Ace2	NM_001130513	0.461	-1.11716	0.00329813	0.0372642
Dmd	NM_007868	0.462	-1.11404	3.99874e-07	1.63421e-05
Eed	NM_021876	0.462	-1.11404	5.47289e-07	2.16536e-05
5430416O09Rik	NR_033355	0.471	-1.0862	0.000296272	0.00516436
Spa17	NM_011449	0.473	-1.08009	0.00402867	0.0435403
Car4	NM_007607	0.474	-1.07704	1.57339e-08	8.81773e-07
Fanca	NM_016925	0.474	-1.07704	0.014175	0.0400333
Angptl3	NM_013913	0.475	-1.074	0.00192071	0.0244112
Bckdha	NM_007533	0.476	-1.07097	1.93994e-05	0.000517191
2310040G24Rik	NR_040293	0.478	-1.06492	0.000159405	0.00306895
Agtpbp1	NM_023328	0.481	-1.05589	5.24163e-09	3.15191e-07
Eci1	NM_010023	0.485	-1.04394	6.61029e-10	4.53419e-08
Cyp4b1	NM_007823	0.486	-1.04097	1.7537e-05	0.000472151
Nfkbia	NM_010907	0.487	-1.03801	4.57646e-05	0.0010902
Abhd14b	NM_029631	0.487	-1.03801	0.00823102	0.0447031
Adh1	NM_007409	0.489	-1.03209	0.000916987	0.013148
Mrpl14	NM_026732	0.491	-1.02621	0.000261274	0.00468031
Nlrc5	NM_001033207	0.491	-1.02621	0.00874788	0.048147
Wbscr16	NM_033572	0.492	-1.02327	0.00258017	0.0310029
Slc25a34	NM_001013780	0.493	-1.02034	1.10192e-09	7.23134e-08
Dhdh	NM_027903	0.495	-1.0145	2.95896e-08	1.56048e-06
Sema6b	NM_013662	0.495	-1.0145	0.00226241	0.0277715
Nampt	NM_021524	0.498	-1.00578	2.15885e-08	1.16017e-06
Cyp2e1	NM_021282	0.498	-1.00578	0.0120133	0.0311459
Trim7	NM_053166	0.501	-0.997117	1.64392e-05	0.000446115
Rbm12	NM_170598	0.501	-0.997117	0.0206093	0.0436022
Bcl2l12	NM_029410	0.505	-0.985645	0.0186711	0.0338553
Ccdc39	NM_026222	0.505	-0.985645	0.0140506	0.039442
Gm4070	NM_001243039	0.506	-0.982791	0.0133253	0.0361458
Gm5617	NM_001004191	0.508	-0.9771	0.00263094	0.031523
Slc2a12	NM_178934	0.509	-0.974262	0.00319209	0.0363955
Irf7	NM_001252601	0.51	-0.971431	0.000469165	0.00754311
Tfpi	NM_011576	0.511	-0.968605	2.54754e-08	1.36368e-06
2610305D13Rik	NM_145078	0.511	-0.968605	0.000188028	0.00352068
1810044D09Rik	NR_038153	0.511	-0.968605	0.00827473	0.0449006
Vtn	NM_011707	0.512	-0.965784	0.000547243	0.00856637
Car3	NM_007606	0.513	-0.962969	0.00339664	0.0380971
Decr1	NM_026172	0.515	-0.957356	1.2229e-08	6.92638e-07
Cdh23	NM_023370	0.516	-0.954557	0.000713796	0.0106952
Wdr45	NM_172372	0.516	-0.954557	0.00165956	0.021589
Mndal	NM_001170853	0.517	-0.951764	1.23423e-07	5.61575e-06
Magix	NR_037581	0.521	-0.940645	7.25112e-05	0.00160158
Igsf23	NM_027308	0.523	-0.935117	0.0124619	0.0408327
Egflam	NM_001289498	0.526	-0.926865	3.66457e-05	0.000898592
Gm3716	NR_045078	0.528	-0.92139	0.0189416	0.0349444
Gucy1a2	NM_001033322	0.529	-0.91866	0.00104171	0.0146528
Gulp1	NM_028450	0.53	-0.915936	0.0093016	0.0212328
Tmem179	NM_178915	0.532	-0.910502	0.0107766	0.0301974
Mpc2	NM_027430	0.535	-0.902389	9.03775e-06	0.000269357
Kcnj8	NM_008428	0.539	-0.891643	4.77372e-05	0.00112541
Gm14403	NR_036450	0.539	-0.891643	0.000295681	0.00516118
Abcb1a	NM_011076	0.54	-0.888969	2.05377e-07	9.01415e-06
Ppip5k2	NM_173760	0.541	-0.8863	4.71072e-05	0.00111441
Chac2	NM_026527	0.542	-0.883635	5.42778e-06	0.000172702
Pclo	NM_011995	0.542	-0.883635	0.0179277	0.0465691
St8sia4	NM_009183	0.544	-0.878321	2.32946e-06	8.15311e-05
Abca12	NM_175210	0.544	-0.878321	0.00086844	0.0125975
Nxt2	NM_001161430	0.544	-0.878321	0.0112075	0.033225
1810014B01Rik	NR_015572	0.544	-0.878321	0.0116322	0.0357628
Zfp36	NM_011756	0.545	-0.875672	6.42872e-05	0.00144567
Phkg1	NM_011079	0.545	-0.875672	0.000789708	0.0116284
Rps2	NM_008503	0.547	-0.870387	0.00033086	0.00565236
Mylip	NM_153789	0.548	-0.867752	9.59292e-05	0.00203996
Mrps34	NM_023260	0.548	-0.867752	0.0122094	0.0391426
Klhdc1	NM_178253	0.549	-0.865122	1.8497e-06	6.62689e-05
Kti12	NM_029571	0.552	-0.85726	0.0157004	0.0193933
Cmya5	NM_023821	0.554	-0.852042	1.01939e-05	0.000297293
Fdft1	NM_010191	0.554	-0.852042	2.84353e-05	0.000725498
Mid1ip1	NM_001166635	0.555	-0.84944	4.73597e-07	1.90135e-05
Fitm2	NM_173397	0.557	-0.844251	1.08288e-06	4.03862e-05
Mrm1	NM_145433	0.558	-0.841663	0.0130077	0.0350891
Clcn1	NM_013491	0.558	-0.841663	0.0212703	0.0471417
Prrg1	NM_001289683	0.56	-0.836501	0.00167822	0.0217962
Gpr17	NM_001025381	0.56	-0.836501	0.00173638	0.0223536
Asnsd1	NM_133728	0.562	-0.831358	0.0182105	0.032079
Dut	NM_001159646	0.564	-0.826233	5.47174e-05	0.00127022
Psme1	NM_011189	0.565	-0.823677	2.57994e-06	8.89297e-05
Pex7	NM_008822	0.565	-0.823677	0.0128945	0.0434136
Fuz	NM_027376	0.565	-0.823677	0.0158365	0.0477446
Sh2d3c	NR_045535	0.567	-0.818579	0.0107774	0.0301974
Iqcb1	NM_177128	0.567	-0.818579	0.00720697	0.0382214
Irf2bp2	NM_001164598	0.568	-0.816037	4.27656e-05	0.00102736
Acaa2	NM_177470	0.568	-0.816037	0.000503233	0.0079596
Aco2	NM_080633	0.568	-0.816037	0.000888823	0.0127979
Ube2e3	NM_009454	0.568	-0.816037	0.00106527	0.0149137
Chchd3	NM_025336	0.568	-0.816037	0.00111294	0.0153917
Atp5s	NM_026536	0.568	-0.816037	0.00253261	0.0304851
Btbd3	NM_001025431	0.568	-0.816037	0.00363964	0.0400012
Echdc3	NM_024208	0.569	-0.813499	0.0145866	0.0128728
Arap2	NM_178407	0.569	-0.813499	0.00180819	0.0231536
Qsox2	NM_153559	0.569	-0.813499	0.00767497	0.0412191
Cnot6l	NM_178854	0.57	-0.810966	0.000531973	0.00835608
Itpripl1	NM_001163528	0.57	-0.810966	0.0181265	0.0315994
Adamts7	NM_001311115	0.572	-0.805913	0.00013621	0.00271929
Stard7	NM_139308	0.572	-0.805913	0.000560403	0.00869939
Mkrn2	NM_023290	0.572	-0.805913	0.000846338	0.0123912
Anpep	NM_008486	0.572	-0.805913	0.0226506	0.0357679
Faap100	NM_027980	0.573	-0.803393	0.0142729	0.011264
Iigp1	NM_001146275	0.574	-0.800877	0.000305123	0.00529216
Acadvl	NM_017366	0.574	-0.800877	0.000710483	0.0106572
Cyth1	NM_001112699	0.574	-0.800877	0.00136819	0.0183637
Ifih1	NM_027835	0.574	-0.800877	0.00775546	0.0415656
Slc28a2	NM_172980	0.574	-0.800877	0.0179865	0.0467036
Kank3	NM_030697	0.574	-0.800877	0.00466079	0.0485276
Fbxo31	NM_133765	0.575	-0.798366	0.00110791	0.0153689
Fam210a	NM_153794	0.575	-0.798366	0.00140735	0.0188184
Dennd6a	NM_001285467	0.575	-0.798366	0.00547763	0.0249373
Pfdn6	NM_001185182	0.575	-0.798366	0.00277	0.0326516
Prr33	NR_033261	0.575	-0.798366	0.0189565	0.0349797
Klhl5	NM_175174	0.575	-0.798366	0.00683311	0.0354081
Trim30a	NM_009099	0.576	-0.795859	0.00164604	0.0214803
Oxct1	NM_024188	0.576	-0.795859	0.00519816	0.0228725
Steap4	NM_054098	0.576	-0.795859	0.0030877	0.0356858
Atraid	NM_027855	0.576	-0.795859	0.0195289	0.0381904
Tmem143	NM_144801	0.577	-0.793357	1.69173e-05	0.000458176
Dusp18	NM_173745	0.577	-0.793357	3.17573e-05	0.00079832
Tecrl	NM_153801	0.577	-0.793357	0.00314177	0.0360379
Sclt1	NM_001081411	0.577	-0.793357	0.00475939	0.0493285
Sult1a1	NM_133670	0.578	-0.790859	0.00018931	0.00353984
Lpin1	NM_015763	0.578	-0.790859	0.00158581	0.0208715
Adgrf5	NM_001081178	0.579	-0.788365	0.0022989	0.0281435
Rasgrp2	NM_011242	0.579	-0.788365	0.00241203	0.0292659
Clmn	NR_104435	0.58	-0.785875	0.00948093	0.0223248
Nmnat3	NM_144533	0.58	-0.785875	0.0167384	0.0411201
Dcakd	NM_026551	0.58	-0.785875	0.00849426	0.0463811
Nit2	NM_023175	0.581	-0.78339	0.0134125	0.036198
Efna1	NM_010107	0.581	-0.78339	0.00885967	0.0488478
Nudt7	NM_024437	0.582	-0.780909	5.69432e-05	0.00130854
Tlr3	NM_126166	0.582	-0.780909	0.0163719	0.0498717
Tecr	NM_134118	0.583	-0.778432	1.38935e-05	0.000385461
Ndufs3	NM_026688	0.583	-0.778432	0.00131571	0.017694
Mterf2	NM_028832	0.583	-0.778432	0.0158388	0.0200136
Ndufv3	NM_030087	0.584	-0.77596	0.00122473	0.0166756
Arfgef1	NM_001102430	0.584	-0.77596	0.00311653	0.035869
Nceh1	NM_178772	0.584	-0.77596	0.0136891	0.0483856
Asb15	NM_080847	0.585	-0.773491	3.781e-06	0.000125268
Ogn	NM_008760	0.585	-0.773491	6.71645e-06	0.000209229
Mccc2	NM_030026	0.585	-0.773491	0.00146162	0.0194312
Sdpr	NM_138741	0.586	-0.771027	0.000996532	0.014096
Atp5o	NM_138597	0.586	-0.771027	0.00114193	0.0157365
Ushbp1	NM_181418	0.586	-0.771027	0.00224119	0.0276103
Rgs5	NM_009063	0.586	-0.771027	0.00274543	0.032418
Immp1l	NM_028260	0.586	-0.771027	0.00759731	0.040884
Srrm4	NM_026886	0.586	-0.771027	0.00418583	0.0447429
Id1	NM_010495	0.586	-0.771027	0.00427496	0.0455173
Gbp5	NM_153564	0.587	-0.768568	0.000131866	0.00265875
Snhg14	NR_015456	0.587	-0.768568	0.00497068	0.0210533
Ankrd9	NM_175207	0.587	-0.768568	0.0117465	0.0363582
Stat1	NM_001205313	0.587	-0.768568	0.00868704	0.0477562
Psme4	NM_134013	0.588	-0.766112	2.80308e-05	0.000716518
Hdlbp	NM_133808	0.588	-0.766112	3.35165e-05	0.00083945
Aasdhppt	NM_026276	0.588	-0.766112	0.000439072	0.00715194
Klf2	NM_008452	0.588	-0.766112	0.00880953	0.0485948
Gnpat	NM_010322	0.589	-0.76366	0.00121666	0.0166074
Lipe	NM_010719	0.589	-0.76366	0.00678397	0.0349833
Polr2k	NM_023127	0.589	-0.76366	0.0120543	0.0382333
Rhob	NM_007483	0.59	-0.761213	5.58199e-05	0.00128924
Kitl	NM_013598	0.59	-0.761213	0.0012253	0.0166756
Rasgrp3	NM_207246	0.59	-0.761213	0.00514816	0.0224813
Coq3	NM_172687	0.59	-0.761213	0.0120241	0.0311459
Pcdh17	NM_001013753	0.59	-0.761213	0.023265	0.0376784
Fkbp4	NM_010219	0.591	-0.75877	6.00273e-06	0.000189232
Fam102b	NM_001163567	0.591	-0.75877	0.00117001	0.016067
Aaed1	NM_025370	0.591	-0.75877	0.0184202	0.0328941
Ptrh2	NM_175004	0.591	-0.75877	0.0148879	0.0435627
Mrps25	NM_025578	0.591	-0.75877	0.00847015	0.0462146
Ttll1	NM_178869	0.592	-0.756331	7.99568e-06	0.000243076
Cav2	NM_016900	0.592	-0.756331	0.00364553	0.0400012
Tnfrsf21	NM_178589	0.592	-0.756331	0.0181008	0.0470898
Pim3	NM_145478	0.593	-0.753896	0.000373184	0.0062426
Bzw2	NM_025840	0.593	-0.753896	0.00212311	0.0263939
Nmnat1	NM_133435	0.593	-0.753896	0.00573304	0.0269134
Vsir	NM_028732	0.593	-0.753896	0.00243713	0.0295181
Gbp3	NM_001289492	0.593	-0.753896	0.0235855	0.0388901
Egln2	NM_053208	0.594	-0.751465	0.0160959	0.0208731
Pnpla2	NR_028142	0.594	-0.751465	0.00161373	0.0211562
Atp5c1	NM_001112738	0.594	-0.751465	0.00203003	0.0254219
Snrk	NM_133741	0.594	-0.751465	0.0102232	0.0266749
Hsd17b10	NM_016763	0.594	-0.751465	0.00219674	0.0271855
Cul3	NM_001313728	0.594	-0.751465	0.00787086	0.0422996
Prkd2	NM_001252458	0.595	-0.749038	0.0229674	0.036337
Dnajc15	NM_025384	0.595	-0.749038	0.00448766	0.0470578
Chchd1	NM_025366	0.596	-0.746616	0.0141563	0.01068
Lyrm5	NM_133688	0.596	-0.746616	0.0131625	0.0355986
Fbxo32	NM_026346	0.596	-0.746616	0.015978	0.0482223
Snrpn	NM_001082962	0.597	-0.744197	0.00520499	0.0228889
Oxnad1	NM_145460	0.597	-0.744197	0.0055757	0.0256343
Nostrin	NM_181547	0.597	-0.744197	0.0122417	0.0321798
Btnl9	NM_172793	0.598	-0.741783	1.03523e-05	0.000299796
Rplp1	NM_018853	0.598	-0.741783	0.00542553	0.0246154
Akr1c14	NM_134072	0.598	-0.741783	0.00222299	0.0274604
Pccb	NM_025835	0.598	-0.741783	0.00320786	0.0365199
Pknox1	NR_027493	0.599	-0.739372	0.0229468	0.036337
Lekr1	NM_001166659	0.599	-0.739372	0.019134	0.0422545
Mtrf1	NM_145960	0.601	-0.734563	0.00517982	0.0227253
Coq10a	NM_001081040	0.602	-0.732165	8.88133e-06	0.000265274
1810011O10Rik	NM_026931	0.602	-0.732165	0.00271189	0.0321331
Impa2	NM_053261	0.603	-0.72977	0.00265617	0.0316727
Gstz1	NM_001252555	0.605	-0.724993	0.000185674	0.00348618
Pxmp2	NM_008993	0.605	-0.724993	0.00415306	0.0444613
Sgk1	NM_001161845	0.606	-0.72261	3.66678e-05	0.000898592
Oxld1	NM_025560	0.606	-0.72261	0.0174649	0.0279633
Sdhaf4	NM_026503	0.606	-0.72261	0.0132089	0.0455015
Clec1a	NM_175526	0.607	-0.720232	5.90285e-05	0.00134514
Il10rb	NM_008349	0.607	-0.720232	6.85588e-05	0.00152471
Rsad2	NM_021384	0.607	-0.720232	0.0032408	0.0367704
Sesn1	NM_001162908	0.609	-0.715486	3.45499e-05	0.000860594
Cav1	NM_007616	0.609	-0.715486	4.22649e-05	0.00102104
Polq	NM_029977	0.609	-0.715486	0.00443372	0.0467338
Tfdp2	NM_178667	0.61	-0.713119	5.49627e-05	0.00127159
4930578C19Rik	NR_132634	0.61	-0.713119	0.0012737	0.0172139
Cd36	NM_001159557	0.611	-0.710756	0.000107029	0.00224736
Dnajc28	NM_138664	0.611	-0.710756	0.000454628	0.00737015
Fas	NM_007987	0.613	-0.706041	0.00193634	0.0245086
Sgol2a	NM_199007	0.613	-0.706041	0.0134029	0.036198
Ccm2l	NM_145536	0.614	-0.703689	0.00373119	0.0406795
Alkbh7	NM_025538	0.615	-0.701342	0.00238852	0.0290323
Nudt6	NM_153561	0.615	-0.701342	0.0155475	0.046933
Kit	NM_021099	0.616	-0.698998	0.0100536	0.0257164
Gbp9	NM_172777	0.617	-0.696658	6.34842e-05	0.00143233
Rhobtb1	NM_001252638	0.617	-0.696658	0.000851449	0.0124302
Gpcpd1	NM_028802	0.617	-0.696658	0.00160805	0.0211056
Cep128	NM_181815	0.617	-0.696658	0.00290906	0.0339971
Ppil1	NM_026845	0.618	-0.694321	0.00404736	0.0436731
Bbs9	NM_178415	0.618	-0.694321	0.0156359	0.0472706
Nudt2	NM_025539	0.618	-0.694321	0.0158399	0.0477446
Ctnna3	NM_177612	0.62	-0.68966	2.5929e-05	0.000672872
Gbp7	NM_001083312	0.62	-0.68966	0.000271971	0.0048213
Kcna5	NM_145983	0.62	-0.68966	0.000952227	0.0135819
Mcf2l	NM_178076	0.62	-0.68966	0.00639813	0.0319833
Bbof1	NM_028377	0.62	-0.68966	0.00732358	0.0389903
Irgm2	NM_019440	0.621	-0.687335	0.0102306	0.0266841
Acot2	NM_134188	0.622	-0.685014	5.94687e-05	0.00135291
2310061I04Rik	NM_001033630	0.622	-0.685014	0.000237744	0.00431543
Ap4s1	NM_021710	0.622	-0.685014	0.000879903	0.0127182
Ech1	NM_016772	0.623	-0.682696	4.31321e-05	0.0010329
Vav3	NM_020505	0.623	-0.682696	0.0145729	0.0420929
Coq9	NM_026452	0.624	-0.680382	4.66212e-05	0.00110675
Gna12	NM_010302	0.625	-0.678072	0.000222161	0.00407046
Phyh	NM_010726	0.625	-0.678072	0.000239369	0.0043334
Colec11	NM_027866	0.625	-0.678072	0.00169437	0.021964
Tcp11l2	NM_146008	0.626	-0.675765	0.000861172	0.012532
Nsmce1	NM_026330	0.626	-0.675765	0.00108797	0.0151533
Gdap10	NR_045032	0.626	-0.675765	0.0162981	0.0219009
Sh3glb1	NM_001282037	0.627	-0.673463	6.4188e-05	0.00144567
Abhd18	NM_026622	0.627	-0.673463	0.000148768	0.00290513
Tmod4	NM_016712	0.627	-0.673463	0.00972349	0.0235104
Mgll	NM_011844	0.628	-0.671164	0.000322951	0.00554563
Park2	NM_016694	0.628	-0.671164	0.00354322	0.039162
H2-T24	NM_008207	0.629	-0.668868	0.000485368	0.0077398
C1qtnf9	NM_183175	0.629	-0.668868	0.00054936	0.00857983
H2-Q4	NM_001143689	0.629	-0.668868	0.0157583	0.0196331
Morn2	NM_194269	0.629	-0.668868	0.0163877	0.0498717
Cdnf	NM_177647	0.63	-0.666576	0.000750259	0.0111079
Cox5b	NM_009942	0.632	-0.662004	0.00351896	0.0389885
Fmo1	NM_010231	0.634	-0.657445	0.000140885	0.0027919
Ifi44	NM_133871	0.634	-0.657445	0.00510233	0.0221309
Cbr4	NM_145595	0.635	-0.655172	0.000551615	0.00859537
Dram2	NM_026013	0.635	-0.655172	0.00124582	0.0169208
Arl4d	NM_025404	0.635	-0.655172	0.0155584	0.0187099
Myot	NM_001033621	0.635	-0.655172	0.00959382	0.0227785
Ddx60	NM_001293783	0.635	-0.655172	0.0150814	0.0445968
Fkbp3	NM_013902	0.636	-0.652901	0.00505091	0.0216879
Tmem159	NM_145586	0.636	-0.652901	0.00473965	0.0491987
Tspan13	NM_025359	0.637	-0.650635	0.0001653	0.00316514
Etfdh	NM_025794	0.637	-0.650635	0.000206614	0.00382152
Cpeb3	NM_198300	0.637	-0.650635	0.000372666	0.0062426
Ifi203	NM_001302649	0.638	-0.648372	0.000165329	0.00316514
Myo1b	NM_001161817	0.639	-0.646112	9.31738e-05	0.00199033
D830032E09Rik	NR_102307	0.639	-0.646112	0.00564682	0.0261391
Cs	NM_026444	0.64	-0.643856	0.000146567	0.00287447
9930111J21Rik2	NM_173434	0.64	-0.643856	0.00028262	0.00499063
Haus1	NM_146089	0.641	-0.641604	0.01091	0.0310277
Slc26a10	NM_177615	0.641	-0.641604	0.00628358	0.0311775
Fsd1l	NM_001195284	0.642	-0.639355	0.000317137	0.00546581
Mrpl1	NM_053158	0.642	-0.639355	0.000979077	0.0138932
Aqp1	NM_007472	0.642	-0.639355	0.00225767	0.0277383
Schip1	NM_001113421	0.642	-0.639355	0.00661312	0.033646
Cdh19	NM_001081386	0.642	-0.639355	0.0205756	0.048168
Vwa3a	NM_177697	0.643	-0.637109	0.00557973	0.0256343
Gbp4	NM_001256005	0.643	-0.637109	0.00234523	0.028557
Bckdhb	NM_199195	0.643	-0.637109	0.00296898	0.0346381
Faf1	NM_007983	0.644	-0.634867	0.000478391	0.00766131
Usp21	NM_013919	0.644	-0.634867	0.0066105	0.033646
Ift81	NM_009879	0.644	-0.634867	0.00338069	0.0379494
Clpp	NM_017393	0.645	-0.632629	0.000436132	0.00712958
Sp100	NM_013673	0.646	-0.630394	0.000241199	0.00436074
Mrps36	NM_025369	0.647	-0.628162	0.00387953	0.0421621
Ttc32	NM_029321	0.648	-0.625934	0.00561999	0.0259132
2310036O22Rik	NM_026760	0.648	-0.625934	0.0108078	0.0303961
Gbp2	NM_010260	0.648	-0.625934	0.00284342	0.0333187
Pcdh19	NM_001105245	0.648	-0.625934	0.00346488	0.0386402
Gimap8	NM_001077410	0.649	-0.62371	0.00301903	0.035102
Clec9a	NM_001205363	0.649	-0.62371	0.0041201	0.044283
Tinf2	NM_145705	0.65	-0.621488	0.0153938	0.0176517
Ablim3	NM_001164491	0.65	-0.621488	0.00224755	0.0276387
A430046D13Rik	NR_131150	0.651	-0.619271	0.0184966	0.0488406
Gbp6	NM_194336	0.652	-0.617056	0.0170682	0.0259835
Insig1	NM_153526	0.653	-0.614845	0.0228457	0.0361258
Hdac9	NM_001271386	0.654	-0.612637	0.00267872	0.0318506
Efcab2	NM_026626	0.655	-0.610433	0.00125864	0.017061
Dhrs4	NM_001037938	0.655	-0.610433	0.00577828	0.0271594
Hibadh	NM_145567	0.656	-0.608232	0.000284875	0.00501748
Cobll1	NM_177025	0.656	-0.608232	0.000421067	0.00691644
Pald1	NM_013753	0.656	-0.608232	0.0176318	0.0452665
Cutc	NM_001113562	0.656	-0.608232	0.0207501	0.0489863
Klf12	NM_010636	0.657	-0.606035	0.0114412	0.0346498
Ablim1	NM_178688	0.658	-0.603841	0.000520562	0.00818625
Clpx	NM_011802	0.658	-0.603841	0.000881702	0.0127182
Mgme1	NM_001289631	0.658	-0.603841	0.00661639	0.033646
Pik3r6	NM_001004435	0.659	-0.60165	0.011923	0.0374548
Nt5c3	NM_001252374	0.66	-0.599462	0.0007624	0.0112627
Tsc22d3	NM_001077364	0.66	-0.599462	0.00524415	0.0231817
Arrdc4	NM_001042592	0.66	-0.599462	0.0172418	0.0267368
Stard8	NM_199018	0.661	-0.597278	0.000499141	0.00792241
1500011K16Rik	NR_015476	0.661	-0.597278	0.00365869	0.0401133
Rnf125	NM_026301	0.661	-0.597278	0.0188995	0.0409531
Iba57	NM_173785	0.661	-0.597278	0.00860501	0.0472245
Echs1	NM_053119	0.662	-0.595097	0.00032554	0.00558243
Osgepl1	NR_104361	0.662	-0.595097	0.00108904	0.0151533
Colgalt2	NM_177756	0.662	-0.595097	0.0214007	0.0477588
Aldh6a1	NM_134042	0.664	-0.590745	0.000437547	0.00713562
Calr3	NM_028500	0.664	-0.590745	0.00127166	0.0172033
Thap4	NM_025920	0.664	-0.590745	0.010038	0.0256363
Cisd2	NM_025902	0.664	-0.590745	0.00329676	0.0372642
Terf1	NM_009352	0.664	-0.590745	0.0139414	0.0388723
Apool	NM_001313733	0.665	-0.588574	0.0141998	0.0108851
Asb11	NM_026853	0.666	-0.586406	0.000430967	0.00705361
Klhl24	NM_029436	0.666	-0.586406	0.000686785	0.0104162
Samd9l	NM_010156	0.666	-0.586406	0.000716588	0.0107135
Slc22a5	NM_011396	0.666	-0.586406	0.0127607	0.0342485
Cox7a1	NM_009944	0.666	-0.586406	0.00308783	0.0356858

## Sheet: unchanged genes
##20081 nochanged genes
gene_symbol	RefSeq_name	FC(CKO/WT)	log2FoldChange	pvalue	padj
Gm10767	NM_001177750	0.571	-0.809	0.14208	0.470155
Fam117a	NM_172543	0.571	-0.808	0.146301	0.477982
Bmf	NM_138313	0.573	-0.804	0.0784601	0.338704
Bbs12	NM_001255992	0.575	-0.799	0.219098	0.583777
Lgi1	NM_020278	0.576	-0.796	0.0166416	0.123657
Arrdc2	NM_027560	0.576	-0.795	0.0657245	0.302883
Tnip3	NM_001001495	0.576	-0.795	0.0961542	0.380056
Tmem25	NM_027865	0.577	-0.793	0.0216049	0.148943
Mettl25	NM_207522	0.577	-0.794	0.0723084	0.321711
5730508B09Rik	NM_027482	0.577	-0.794	0.0925855	0.371049
Cyp26b1	NM_175475	0.577	-0.794	0.118093	0.424762
Ccdc159	NM_001164614	0.579	-0.788	0.114116	0.416493
Ttk	NM_009445	0.579	-0.788	0.19627	0.552601
Rybp	NM_019743	0.58	-0.786	0.0079	0.0724698
H2-Q6	NM_207648	0.58	-0.785	0.0442061	0.238231
Zfp820	NM_029281	0.58	-0.787	0.126995	0.440642
A930003O13Rik	NR_027362	0.58	-0.786	0.24373	0.613821
Cyct	NM_009989	0.581	-0.784	0.263583	0.636223
Isoc2b	NM_026158	0.582	-0.782	0.0347061	0.203321
Mtl5	NM_001286557	0.582	-0.781	0.0923373	0.370707
Mrgprh	NM_030726	0.583	-0.778	0.030942	0.189909
Nup37	NM_027191	0.583	-0.779	0.0530298	0.266521
Fam228b	NM_175431	0.583	-0.777	0.14386	0.473611
4930565N06Rik	NR_040476	0.584	-0.777	0.0971599	0.381724
Pik3cd	NM_008840	0.585	-0.773	0.0453309	0.241157
Oas1b	NM_001083925	0.585	-0.772	0.159643	0.497984
Zfp72	NM_001081680	0.587	-0.77	0.0295515	0.184191
Oas2	NM_145227	0.59	-0.762	0.0482296	0.250794
Zfp707	NM_001081065	0.591	-0.76	0.12764	0.441757
Rad51ap1	NM_009013	0.591	-0.758	0.149919	0.483223
Moxd1	NM_021509	0.593	-0.755	0.182131	0.533237
Ftsj2	NM_026510	0.594	-0.751	0.0790197	0.339723
Knstrn	NM_026412	0.594	-0.751	0.128517	0.443779
Gnptg	NM_172529	0.596	-0.748	0.084307	0.353111
Prx	NM_198048	0.597	-0.744	0.147436	0.479156
Klk8	NM_008940	0.598	-0.741	0.0787046	0.339362
Car5b	NM_181315	0.599	-0.74	0.276759	0.648097
Slc16a9	NM_025807	0.601	-0.735	0.0692986	0.313324
Ifi27l2a	NM_029803	0.601	-0.735	0.213219	0.576666
Cxxc4	NM_001004367	0.602	-0.733	0.0442254	0.238231
4632428C04Rik	NR_033631	0.602	-0.733	0.0558313	0.275026
Ly96	NM_016923	0.602	-0.732	0.214981	0.579594
Adnp	NM_001310086	0.602	-0.733	0.25609	0.628895
Kcnn2	NM_001312905	0.603	-0.729	0.00871606	0.0779647
Zfp113	NM_019747	0.603	-0.729	0.0547266	0.271648
Cep55	NM_028760	0.603	-0.731	0.170844	0.515935
Rtn4r	NM_022982	0.604	-0.728	0.0980652	0.383363
Rom1	NM_009073	0.605	-0.725	0.0384787	0.217218
Mmp11	NM_001306184	0.605	-0.725	0.141877	0.469824
Zcwpw1	NM_001005426	0.605	-0.726	0.245635	0.615882
Gja3	NM_001271623	0.607	-0.721	0.0410148	0.226073
Myo7a	NM_001256082	0.609	-0.716	0.0611059	0.290756
Rtp3	NM_153100	0.61	-0.714	0.0376768	0.213664
Gm10125	NR_033552	0.61	-0.712	0.232097	0.601526
Pars2	NM_001285784	0.611	-0.71	0.0924155	0.370803
Kcna7	NM_010596	0.613	-0.707	0.00932007	0.08129
Zfp759	NM_172392	0.613	-0.707	0.0187002	0.133882
Fancg	NM_053081	0.613	-0.705	0.151243	0.485233
Fbxl6	NM_013909	0.614	-0.704	0.119744	0.427881
2610020H08Rik	NM_028129	0.614	-0.704	0.12623	0.439888
Mok	NM_011973	0.614	-0.704	0.2614	0.633638
Rgs2	NM_009061	0.615	-0.701	0.0227246	0.15417
Rgs7	NM_001199003	0.615	-0.702	0.074054	0.326287
Rttn	NM_175542	0.616	-0.699	0.0445314	0.239148
Rpusd4	NM_028040	0.616	-0.699	0.0566295	0.277357
Exo5	NM_028457	0.616	-0.698	0.0828172	0.349636
Gm5523	NR_004447	0.616	-0.699	0.14977	0.482956
Cebpb	NM_001287739	0.617	-0.697	0.0935076	0.373429
Zfp563	NM_001024950	0.617	-0.696	0.133383	0.452343
Hif3a	NM_016868	0.619	-0.692	0.0574545	0.279193
Cmpk2	NM_020557	0.619	-0.693	0.0656101	0.302662
Nmrk1	NM_145497	0.619	-0.691	0.0695656	0.314173
Nme6	NM_018757	0.619	-0.691	0.0875049	0.360205
Tle6	NM_053254	0.619	-0.692	0.158123	0.496233
C330027C09Rik	NM_172616	0.62	-0.69	0.0605371	0.288725
Rfx2	NM_027787	0.62	-0.689	0.0835712	0.351296
Tmem140	NM_197986	0.621	-0.687	0.0404756	0.224547
1700123O20Rik	NM_021437	0.621	-0.688	0.108952	0.405451
F8a	NM_007978	0.621	-0.687	0.405403	0.756473
2810021J22Rik	NM_172403	0.622	-0.686	0.090845	0.367526
C1qtnf2	NM_026979	0.622	-0.686	0.3039	0.677862
Tg	NM_009375	0.623	-0.682	0.159683	0.497984
Amz1	NM_173405	0.623	-0.684	0.25489	0.627629
Adra1b	NM_001284381	0.624	-0.679	0.0204991	0.143126
Jade3	NM_001289684	0.624	-0.68	0.0816104	0.346065
Zfp689	NM_175163	0.624	-0.68	0.142845	0.471885
Zfp953	NM_001038651	0.625	-0.679	0.126896	0.440642
Frmpd3	NM_001320946	0.625	-0.677	0.193404	0.548862
Gnb3	NM_013530	0.625	-0.678	0.194769	0.550435
Ccdc15	NM_001081429	0.626	-0.675	0.0508378	0.259609
Tbxa2r	NM_009325	0.626	-0.677	0.140047	0.465522
Gatsl3	NM_028022	0.626	-0.675	0.195101	0.550654
Mcm8	NM_001291054	0.628	-0.671	0.0901466	0.365894
Gsta3	NM_001077353	0.628	-0.671	0.269231	0.641766
Lrrc4c	NM_001289742	0.628	-0.671	0.280944	0.652728
Mill2	NM_153761	0.629	-0.669	0.0341955	0.201802
Dus4l	NM_028002	0.629	-0.669	0.0479688	0.249723
Zfp41	NM_011759	0.629	-0.668	0.185902	0.538583
Arntl	NM_007489	0.63	-0.666	0.0715383	0.319221
A330069E16Rik	NR_015464	0.631	-0.664	0.164939	0.507533
Nhs	NM_001290526	0.633	-0.659	0.104539	0.396395
Pole	NM_011132	0.634	-0.658	0.158697	0.496952
2610020C07Rik	NR_038156	0.634	-0.658	0.21623	0.581127
Lrrc24	NM_198119	0.635	-0.656	0.0212344	0.147132
Brip1	NM_178309	0.635	-0.655	0.1137	0.416198
Zbtb48	NM_133879	0.636	-0.652	0.106602	0.400637
Ccdc122	NM_001310648	0.637	-0.651	0.123072	0.434036
Kbtbd13	NM_028974	0.638	-0.648	0.242646	0.612518
Ermard	NM_001039552	0.639	-0.646	0.0445239	0.239148
Zfp78	NM_001025163	0.639	-0.647	0.142507	0.471227
Pik3cg	NM_020272	0.639	-0.646	0.329066	0.699671
Sall4	NM_201395	0.64	-0.643	0.284497	0.656301
Frk	NM_010237	0.642	-0.64	0.0733415	0.32451
Bvht	NR_045420	0.642	-0.64	0.0893035	0.364366
Sycp2	NM_177191	0.642	-0.639	0.175983	0.524721
Klf15	NM_023184	0.643	-0.636	0.00724293	0.0684667
Spc24	NM_026282	0.643	-0.637	0.135479	0.455882
Hist2h4	NM_033596	0.643	-0.637	0.2834	0.655278
Dnal4	NM_017470	0.644	-0.635	0.0533677	0.267622
Atg10	NM_025770	0.644	-0.635	0.0675309	0.308397
Zfp939	NM_001243021	0.644	-0.635	0.205783	0.565747
Kcna2	NM_008417	0.645	-0.633	0.0200155	0.14083
Gm19461	NR_037984	0.645	-0.632	0.0271491	0.172928
Agbl3	NM_001289656	0.645	-0.633	0.0893163	0.364366
Olfr78	NM_130866	0.646	-0.631	0.0944527	0.375555
Gm14327	NR_038101	0.646	-0.631	0.431243	0.775453
4930503L19Rik	NM_172967	0.647	-0.629	0.0533872	0.267622
Rnf135	NM_028019	0.647	-0.628	0.205116	0.565281
Rad9b	NM_144912	0.648	-0.626	0.215429	0.580345
Alyref2	NM_019484	0.648	-0.625	0.270895	0.643754
Hsd11b1	NM_008288	0.649	-0.624	0.181902	0.532958
Zfp944	NM_176962	0.65	-0.622	0.0966127	0.380705
Plb1	NM_001081407	0.65	-0.622	0.379951	0.737638
Kcnj15	NR_073406	0.651	-0.619	0.0975207	0.382688
Frs3	NM_144939	0.651	-0.62	0.195409	0.551215
4932435O22Rik	NR_027643	0.651	-0.62	0.384984	0.742043
Med26	NM_027485	0.652	-0.617	0.0511543	0.260641
Map2k6	NM_011943	0.652	-0.618	0.0530159	0.266521
Tmem67	NR_110955	0.652	-0.617	0.0797725	0.341346
Smco4	NM_133214	0.652	-0.617	0.0905434	0.366899
Shpk	NM_029031	0.652	-0.618	0.186116	0.538583
Opcml	NM_177906	0.652	-0.617	0.195541	0.551324
B430212C06Rik	NR_033214	0.652	-0.616	0.275105	0.646784
Gabra1	NM_010250	0.652	-0.616	0.330294	0.700195
Arhgef37	NM_177828	0.653	-0.614	0.113808	0.416384
Nrg4	NM_032002	0.653	-0.616	0.256403	0.62907
Cox4i2	NM_053091	0.654	-0.613	0.0620216	0.29266
Wnt2b	NM_009520	0.654	-0.614	0.222271	0.588029
Epsti1	NM_029495	0.654	-0.613	0.279797	0.6518
Ttc30b	NM_028235	0.655	-0.611	0.0294217	0.183801
Zswim5	NM_001029912	0.655	-0.61	0.206018	0.565957
Rnf138	NM_019706	0.656	-0.608	0.0441095	0.238129
Plk4	NR_045576	0.657	-0.606	0.063427	0.296284
Lingo3	NM_001013758	0.657	-0.605	0.099184	0.386045
1700109H08Rik	NM_029843	0.657	-0.605	0.134261	0.453525
Immp2l	NM_053122	0.657	-0.605	0.163181	0.504625
Tnfrsf25	NM_001291010	0.658	-0.604	0.2914	0.663257
Ufsp1	NM_027356	0.658	-0.604	0.294955	0.667271
Gm20604	NM_001142939	0.658	-0.604	0.315871	0.687374
Gm4841	NM_001034859	0.658	-0.604	0.316679	0.687884
Pltp	NM_011125	0.659	-0.601	0.0278568	0.176251
Gdf11	NM_010272	0.659	-0.602	0.0708629	0.317766
Apex2	NM_029943	0.66	-0.6	0.0629557	0.295206
Sigirr	NM_023059	0.66	-0.6	0.207899	0.568929
Amdhd2	NM_172935	0.66	-0.6	0.218505	0.582904
Tomm20l	NM_029227	0.66	-0.6	0.226194	0.593346
Ccrl2	NM_001302377	0.661	-0.598	0.112691	0.414241
Uty	NM_009484	0.664	-0.591	0.00777154	0.0715799
Mest	NM_001252292	0.664	-0.591	0.0642523	0.298619
Clec1b	NM_019985	0.664	-0.591	0.066586	0.305512
Zbtb49	NM_029162	0.664	-0.59	0.181381	0.532213
Slc10a6	NM_029415	0.664	-0.591	0.220871	0.585985
Slitrk6	NM_175499	0.664	-0.591	0.237699	0.606466
Ier5l	NM_030244	0.664	-0.59	0.279955	0.6518
Get4	NM_026269	0.665	-0.589	0.113442	0.415366
Rad18	NM_001167730	0.665	-0.588	0.22769	0.595395
Reep4	NM_180588	0.665	-0.589	0.293376	0.665656
Srrd	NM_027323	0.665	-0.588	0.334807	0.703745
Arsg	NM_028710	0.666	-0.587	0.322463	0.694481
Thsd1	NM_019576	0.667	-0.584	0.0371256	0.211947
Mcat	NM_001030014	0.667	-0.584	0.0474332	0.248217
Zfp189	NM_001289901	0.667	-0.584	0.0723462	0.321774
Lrrc48	NM_029044	0.667	-0.585	0.131485	0.449168
Tmtc2	NM_177368	0.668	-0.583	0.0462593	0.243987
Cxcl9	NM_008599	0.668	-0.582	0.11851	0.425702
Micall2	NM_174850	0.668	-0.582	0.263899	0.636223
4921504A21Rik	NR_102341	0.669	-0.58	0.0762012	0.333302
Mcts2	NM_025543	0.669	-0.579	0.0782836	0.338262
Pex12	NM_134025	0.669	-0.58	0.0991742	0.386045
Tceanc	NM_001007577	0.669	-0.581	0.186435	0.53916
0610040B10Rik	NR_027874	0.669	-0.58	0.267207	0.63989
Ccdc67	NM_181816	0.669	-0.58	0.416901	0.763992
A930016O22Rik	NR_073014	0.67	-0.578	0.119373	0.42732
Clec12a	NM_177686	0.67	-0.578	0.281305	0.652808
Fance	NR_028297	0.671	-0.576	0.184363	0.536924
Ovol1	NM_019935	0.673	-0.572	0.0770558	0.33572
Nudt16l1	NM_001316715	0.673	-0.572	0.143394	0.472618
Prkar2b	NM_011158	0.673	-0.57	0.354825	0.720846
Mettl20	NM_001252095	0.674	-0.57	0.0506281	0.258732
Ncf1	NR_104383	0.674	-0.568	0.238095	0.606859
Hmmr	NM_013552	0.674	-0.569	0.288527	0.660472
Mipol1	NM_001164370	0.675	-0.568	0.0793874	0.340414
Gtf2h4	NM_010364	0.675	-0.568	0.0882993	0.361544
Zfp472	NM_153063	0.675	-0.566	0.187265	0.539959
Parp10	NM_001163575	0.676	-0.566	0.0678846	0.309597
Kif23	NM_024245	0.676	-0.565	0.0798884	0.341521
Arhgef26	NM_001081295	0.676	-0.565	0.119196	0.42732
Pddc1	NM_172116	0.676	-0.565	0.300331	0.673487
Pus7	NM_001289780	0.677	-0.563	0.0495558	0.255426
4833422C13Rik	NR_028314	0.677	-0.562	0.101925	0.390949
Zfp712	NM_001166218	0.677	-0.562	0.19748	0.554878
Hsbp1l1	NM_001136181	0.677	-0.562	0.404336	0.755847
Tasp1	NM_001159640	0.678	-0.56	0.0474613	0.248217
Gstp2	NM_181796	0.678	-0.561	0.276955	0.648363
Ifi47	NM_001271676	0.678	-0.56	0.295011	0.667271
Isg20	NM_001291221	0.678	-0.561	0.348011	0.714679
Vars2	NM_175137	0.679	-0.558	0.0413206	0.227162
Cyp2j9	NM_028979	0.679	-0.559	0.130646	0.448219
A830082K12Rik	NR_045195	0.679	-0.56	0.16157	0.50169
Apoo-ps	NR_004438	0.679	-0.559	0.175378	0.523836
Pcdhga9	NM_033592	0.681	-0.554	0.135681	0.456055
Mamdc4	NM_001081199	0.681	-0.555	0.295458	0.667605
Sox17	NM_011441	0.682	-0.552	0.0298702	0.1855
Zfp760	NM_001008501	0.682	-0.552	0.0791817	0.340098
4732471J01Rik	NR_015569	0.682	-0.551	0.350817	0.717079
2700094K13Rik	NM_001037279	0.683	-0.549	0.158225	0.496233
Pigyl	NM_001082532	0.684	-0.548	0.0112885	0.0937277
Aatk	NM_001198787	0.685	-0.546	0.192089	0.546709
Prcp	NM_028243	0.686	-0.543	0.0431037	0.233942
Mcm3	NM_008563	0.686	-0.544	0.0469135	0.246296
Col28a1	NM_001037865	0.686	-0.543	0.29267	0.664386
Zfp457	NM_001003666	0.686	-0.543	0.42345	0.769645
Fam117b	NM_001037725	0.687	-0.542	0.0580119	0.280985
F8	NM_007977	0.687	-0.541	0.0826498	0.349279
4930452B06Rik	NM_028934	0.687	-0.541	0.154462	0.490196
Rerg	NM_001164212	0.687	-0.542	0.291405	0.663257
Pgls	NM_025396	0.688	-0.541	0.0380121	0.215174
Donson	NM_021720	0.688	-0.539	0.168945	0.513573
Nek4	NM_011849	0.689	-0.538	0.0690552	0.312431
Rnaseh1	NM_011275	0.689	-0.537	0.0848238	0.354318
Tmco4	NM_029857	0.689	-0.538	0.16382	0.50524
Fam227a	NM_029407	0.689	-0.538	0.256648	0.629175
Arrdc1	NM_178408	0.689	-0.537	0.275262	0.646784
Xrcc6bp1	NM_026858	0.689	-0.537	0.309327	0.682008
1700007L15Rik	NR_045709	0.689	-0.537	0.36265	0.725009
Smc2	NM_008017	0.69	-0.535	0.0447308	0.239546
Stxbp4	NM_011505	0.69	-0.536	0.0607731	0.289649
AK010878	NM_001142938	0.69	-0.535	0.0946177	0.375992
Zfp931	NM_001162922	0.69	-0.534	0.103169	0.393052
Magohb	NM_025564	0.69	-0.535	0.258526	0.630945
Zfp960	NM_001163919	0.69	-0.536	0.286624	0.657993
Hcn2	NM_008226	0.691	-0.534	0.0313552	0.191413
Aurka	NM_011497	0.691	-0.533	0.313571	0.68607
Ap4b1	NM_001163552	0.691	-0.533	0.329063	0.699671
4430402I18Rik	NM_198651	0.692	-0.531	0.0265321	0.170269
Orc6	NM_019716	0.692	-0.532	0.0793624	0.340414
Palb2	NM_001081238	0.692	-0.531	0.345421	0.713554
Atxn7l2	NM_175183	0.692	-0.531	0.351416	0.717981
Lcorl	NM_178142	0.693	-0.529	0.0401481	0.224013
Carnmt1	NM_026120	0.693	-0.53	0.0434064	0.235025
Apln	NM_013912	0.693	-0.53	0.0519736	0.262853
Ttc38	NM_001033337	0.693	-0.53	0.0686458	0.311691
9530082P21Rik	NR_015472	0.694	-0.528	0.0444971	0.239148
Tspan14	NM_001316748	0.694	-0.528	0.0622095	0.293107
Mreg	NM_001005423	0.695	-0.525	0.0342737	0.201903
Bbs7	NM_027810	0.695	-0.525	0.0573094	0.278885
Slc16a10	NM_001114332	0.696	-0.522	0.0267741	0.171259
Rmdn2	NM_201361	0.696	-0.522	0.0404769	0.224547
Zfp30	NM_013705	0.696	-0.523	0.0954501	0.378198
Gpr137c	NM_027518	0.696	-0.523	0.151132	0.485233
Lurap1l	NM_026821	0.696	-0.523	0.208015	0.568976
Fam60a	NM_019643	0.696	-0.522	0.333067	0.701925
Alg6	NM_001081264	0.697	-0.52	0.0707374	0.317307
Arid3a	NM_007880	0.697	-0.521	0.197862	0.555492
Lpcat4	NM_207206	0.697	-0.52	0.272987	0.645466
1500004A13Rik	NR_015498	0.697	-0.521	0.324668	0.695618
Blvrb	NM_144923	0.699	-0.517	0.0699968	0.315332
Mbnl3	NM_134163	0.699	-0.517	0.54197	0.840962
Fign	NM_001267847	0.7	-0.514	0.0130991	0.104821
B4galt4	NM_019804	0.7	-0.515	0.0190928	0.135738
Dclre1a	NM_018831	0.7	-0.514	0.0263404	0.169838
Lamb3	NM_008484	0.7	-0.515	0.042223	0.230907
Ifi35	NM_027320	0.7	-0.515	0.0439426	0.237363
Tmem55b	NM_001033271	0.7	-0.514	0.13291	0.451637
Slc10a1	NM_001177561	0.7	-0.515	0.332091	0.700841
Ppp4r4	NM_028980	0.7	-0.514	0.415508	0.762896
Pm20d2	NM_001034867	0.701	-0.512	0.00824009	0.0747357
Ndufaf6	NM_001085493	0.701	-0.512	0.0236835	0.157583
Prr29	NM_029345	0.701	-0.513	0.289146	0.661001
Zfp711	NM_177747	0.701	-0.513	0.348503	0.715026
Rab9	NM_019773	0.702	-0.511	0.0105376	0.0886795
Arl6ip1	NM_019419	0.702	-0.51	0.0820762	0.3475
Cd46	NR_132621	0.702	-0.51	0.224218	0.590586
Cpm	NM_027468	0.703	-0.507	0.0599263	0.287455
Zfp383	NM_001243908	0.703	-0.509	0.154961	0.491062
Stx3	NM_001286543	0.704	-0.506	0.0160801	0.120873
St8sia6	NM_145838	0.704	-0.507	0.0163844	0.122345
Xrcc5	NM_009533	0.704	-0.506	0.0260295	0.16839
Sema7a	NM_011352	0.704	-0.506	0.0285228	0.178923
Tdrd7	NM_001290475	0.704	-0.507	0.0380292	0.215174
Ehhadh	NM_023737	0.704	-0.507	0.0886651	0.362359
Lrrtm3	NM_178678	0.704	-0.506	0.314294	0.686466
Rbfa	NM_199197	0.705	-0.504	0.00861651	0.0772768
Vamp5	NM_001080742	0.705	-0.504	0.0318508	0.193268
Actr3b	NM_001004365	0.705	-0.505	0.0844854	0.353642
Fbxl4	NR_104379	0.705	-0.504	0.123088	0.434036
Rbks	NM_153196	0.705	-0.505	0.377111	0.73673
Itgb1bp1	NM_008403	0.706	-0.502	0.0116389	0.0957628
Nt5dc2	NM_027289	0.706	-0.503	0.0299198	0.185723
Vhl	NM_009507	0.706	-0.502	0.177892	0.527186
Asxl3	NM_001167777	0.706	-0.502	0.215573	0.580617
B3gnt3	NM_028189	0.706	-0.503	0.290368	0.662422
Trim21	NM_009277	0.707	-0.5	0.0611908	0.290928
Zfp867	NM_178417	0.707	-0.5	0.117805	0.424395
Slc46a3	NM_027872	0.707	-0.5	0.120392	0.429073
Il16	NM_010551	0.707	-0.501	0.135755	0.456133
Pcdhb16	NM_053141	0.707	-0.501	0.155909	0.492414
Ifi205	NM_172648	0.707	-0.501	0.365065	0.725909
Stk10	NM_009288	0.708	-0.498	0.0126692	0.101966
Pcdh12	NM_017378	0.708	-0.499	0.0130732	0.104724
Crebrf	NM_029870	0.708	-0.499	0.0149728	0.115014
Psmc3ip	NM_008949	0.708	-0.499	0.138507	0.462547
Dlat	NM_145614	0.709	-0.495	0.00887833	0.0788478
Rtn2	NM_013648	0.709	-0.496	0.0088867	0.0788709
Pcdhgb6	NM_033578	0.709	-0.496	0.165502	0.508233
Casc5	NM_029617	0.709	-0.496	0.255121	0.627799
Primpol	NM_001001184	0.709	-0.495	0.292059	0.66355
Mrps17	NM_025450	0.71	-0.494	0.0127229	0.102338
Zfp758	NM_145484	0.71	-0.495	0.049672	0.255645
Acbd4	NM_025988	0.71	-0.494	0.123417	0.434746
Sybu	NM_176998	0.71	-0.495	0.174513	0.522505
Far2	NM_178797	0.71	-0.494	0.324968	0.695924
Fgd4	NM_001301818	0.711	-0.492	0.0108632	0.090748
L2hgdh	NM_145443	0.711	-0.493	0.0242083	0.160161
0610030E20Rik	NM_026696	0.712	-0.49	0.00967177	0.0832932
Fzd6	NM_008056	0.712	-0.49	0.0314734	0.191871
Sumo2	NM_133354	0.712	-0.491	0.047913	0.249538
Dna2	NM_177372	0.712	-0.49	0.33371	0.702378
Nav3	NM_001081035	0.713	-0.487	0.0100821	0.0859052
Xaf1	NM_001037713	0.713	-0.488	0.0124803	0.100922
C130074G19Rik	NM_178692	0.713	-0.489	0.0149245	0.114836
Bcl2l11	NM_207681	0.713	-0.488	0.0622391	0.293107
Gm14005	NR_028590	0.713	-0.487	0.324632	0.695618
Tpgs1	NM_148934	0.713	-0.488	0.350749	0.717047
Yipf7	NM_023784	0.714	-0.487	0.00741711	0.0695354
Rab12	NM_024448	0.714	-0.486	0.00931546	0.08129
Ndufb2	NM_026612	0.714	-0.486	0.0109088	0.0910277
Fam220a	NM_026050	0.714	-0.486	0.0133098	0.106038
Tmem70	NM_026392	0.714	-0.485	0.0160374	0.12075
Zfp317	NM_172918	0.714	-0.487	0.0268427	0.171585
Bcl6b	NM_007528	0.714	-0.487	0.0310746	0.190466
Abca4	NM_007378	0.714	-0.486	0.0506954	0.258979
Arsk	NM_029847	0.714	-0.485	0.12264	0.433127
Lin7a	NM_001284329	0.714	-0.487	0.147466	0.479156
Acot13	NM_025790	0.715	-0.483	0.0202019	0.141704
Abhd10	NM_001272070	0.715	-0.485	0.033231	0.197562
Gm5113	NM_001033540	0.715	-0.484	0.0625669	0.293989
Tldc1	NM_028883	0.715	-0.483	0.132659	0.450995
Vstm4	NM_178791	0.715	-0.485	0.174721	0.522944
Zfp341	NM_199304	0.715	-0.485	0.184526	0.537016
Ccna2	NM_009828	0.715	-0.485	0.238008	0.606859
Pole2	NM_011133	0.715	-0.485	0.370813	0.729837
Pknox2	NM_001029838	0.716	-0.481	0.082024	0.347387
Zfp846	NM_172919	0.716	-0.482	0.108137	0.404212
Mapk7	NM_011841	0.716	-0.481	0.134918	0.454836
Gas2	NM_008087	0.716	-0.481	0.182782	0.534142
Pdk1	NM_172665	0.717	-0.479	0.0080288	0.0733064
Uqcrb	NM_026219	0.717	-0.48	0.0095775	0.08269
Idua	NM_008325	0.717	-0.479	0.0286966	0.179848
9430091E24Rik	NR_040363	0.717	-0.479	0.05155	0.261972
Qser1	NM_001123327	0.718	-0.477	0.0077598	0.0715656
Cat	NM_009804	0.718	-0.477	0.0105014	0.0884294
Pde4d	NM_011056	0.718	-0.478	0.0117141	0.0962759
Arhgef15	NM_177566	0.718	-0.477	0.0154215	0.117797
Oxsm	NM_027695	0.718	-0.477	0.0233475	0.156146
Thap3	NM_175152	0.718	-0.478	0.186753	0.539456
Arhgap28	NM_172964	0.718	-0.478	0.187988	0.540901
B130024G19Rik	NR_045850	0.718	-0.478	0.193641	0.549145
Eif4e	NM_007917	0.719	-0.477	0.0101508	0.0863289
Mrps18c	NM_026826	0.719	-0.476	0.0549955	0.272482
Tbc1d2b	NM_194334	0.719	-0.476	0.101501	0.390507
Zkscan7	NM_001177505	0.719	-0.476	0.209407	0.570883
Zfp873	NM_001319203	0.719	-0.476	0.217967	0.582087
Mbd1	NM_013594	0.72	-0.474	0.0322865	0.194874
Cmss1	NM_025599	0.72	-0.474	0.0359553	0.207434
Zmat1	NM_175446	0.72	-0.474	0.0414015	0.227508
Mcm4	NM_008565	0.72	-0.474	0.0696704	0.314277
Pfkfb3	NM_001177753	0.72	-0.475	0.0760121	0.332803
Cln6	NM_001033175	0.72	-0.475	0.149998	0.483352
Enho	NM_027147	0.72	-0.473	0.323994	0.695618
Cln3	NM_001146311	0.72	-0.473	0.328736	0.699383
Mkln1os	NR_040300	0.72	-0.475	0.329904	0.699979
Tsix	NR_002844	0.72	-0.473	0.337892	0.707396
St3gal6	NM_018784	0.721	-0.471	0.00713258	0.0677521
Kctd12b	NM_175429	0.721	-0.473	0.0329252	0.196337
Tbc1d32	NM_001033385	0.721	-0.471	0.0400094	0.223548
Bet1	NM_009748	0.721	-0.471	0.0402933	0.224491
Mgat4a	NM_173870	0.721	-0.471	0.0518988	0.262767
Adam23	NM_011780	0.721	-0.472	0.0838915	0.351911
Rpe	NM_001310643	0.721	-0.471	0.0904338	0.366624
Senp8	NM_001172068	0.721	-0.471	0.119848	0.428081
Mut	NM_008650	0.722	-0.47	0.00782744	0.0720462
Tppp	NM_182839	0.722	-0.469	0.0258212	0.167745
Zc3h8	NM_020594	0.722	-0.47	0.0537281	0.268936
Pecr	NM_023523	0.722	-0.47	0.104149	0.395742
Gm10033	NR_038043	0.722	-0.469	0.169186	0.51377
Dusp23	NM_026725	0.722	-0.471	0.240415	0.609975
Gdf10	NM_145741	0.722	-0.47	0.353543	0.719523
Dnase1l2	NM_025718	0.722	-0.47	0.581641	0.859035
Mir6236	NR_105744	0.723	-0.469	0.00774194	0.0715656
Mrpl42	NM_026065	0.723	-0.469	0.0165194	0.123098
Pop5	NM_026398	0.723	-0.469	0.0247766	0.162988
Acer2	NM_139306	0.723	-0.469	0.0335623	0.19889
Myo5c	NM_001081322	0.723	-0.467	0.0530355	0.266521
Wrn	NM_001122822	0.723	-0.469	0.0575586	0.279534
Haus2	NM_025475	0.723	-0.468	0.104779	0.396408
Brca2	NM_009765	0.723	-0.468	0.160445	0.499219
Fam212a	NM_026597	0.723	-0.469	0.186749	0.539456
Ccdc167	NM_001163741	0.723	-0.469	0.190135	0.543415
H2-M3	NM_013819	0.723	-0.467	0.304561	0.678071
Adcy9	NM_001291910	0.724	-0.465	0.011558	0.0953276
Mfn1	NM_024200	0.724	-0.466	0.0231392	0.155599
Cidea	NM_007702	0.724	-0.467	0.0317519	0.192971
Plscr4	NM_178711	0.724	-0.466	0.0541346	0.270087
Abhd11	NM_145215	0.724	-0.466	0.070702	0.317307
Zufsp	NM_028287	0.724	-0.465	0.110376	0.408302
Ifi27	NM_026790	0.724	-0.465	0.111287	0.411144
Zfp729b	NM_001163246	0.724	-0.467	0.146867	0.478668
Phf13	NM_172705	0.724	-0.466	0.205592	0.565649
Rap1a	NM_145541	0.725	-0.463	0.0104648	0.0881752
2700029M09Rik	NM_028299	0.725	-0.464	0.030129	0.186598
Galnt7	NM_001167981	0.725	-0.463	0.0425506	0.232048
Kdm5d	NM_011419	0.725	-0.463	0.0502523	0.257583
Pold3	NM_133692	0.725	-0.464	0.0616373	0.291932
Tiparp	NM_178892	0.725	-0.464	0.0631912	0.295731
9330158H04Rik	NR_015589	0.725	-0.464	0.125605	0.439166
Bcl11b	NM_001079883	0.725	-0.465	0.532219	0.834958
Ndufb5	NM_025316	0.726	-0.462	0.00897472	0.079394
Il13ra1	NM_133990	0.726	-0.462	0.0097948	0.0839291
Dhx40	NM_026191	0.726	-0.462	0.0169341	0.125489
Etohi1	NM_001177399	0.726	-0.463	0.034261	0.201903
Nos3	NM_008713	0.726	-0.462	0.0343655	0.202106
Coq6	NM_172582	0.726	-0.462	0.134141	0.453525
Lfng	NM_008494	0.726	-0.462	0.195128	0.550654
Tes	NM_207176	0.726	-0.461	0.242764	0.612518
Sord	NM_146126	0.727	-0.461	0.00764013	0.0709441
Dbt	NM_010022	0.727	-0.46	0.0118842	0.0971953
Srgn	NM_011157	0.727	-0.46	0.0485706	0.2518
Spty2d1	NM_175318	0.727	-0.46	0.0489252	0.253018
Pex11a	NM_011068	0.727	-0.46	0.0598358	0.287187
Fam57b	NM_026884	0.727	-0.459	0.159649	0.497984
Cox18	NM_001163456	0.727	-0.46	0.241354	0.611107
Mad2l1bp	NM_025649	0.727	-0.461	0.290354	0.662422
Ovgp1	NM_007696	0.727	-0.46	0.404303	0.755847
Ccser1	NM_183310	0.727	-0.461	0.419801	0.766593
Afap1l1	NM_178928	0.728	-0.458	0.00926312	0.0810523
Zfp110	NM_022981	0.728	-0.459	0.0246565	0.162512
Dpagt1	NM_007875	0.728	-0.457	0.139366	0.464437
Alas1	NM_020559	0.729	-0.456	0.00887588	0.0788478
Eif3m	NM_145380	0.729	-0.456	0.00925516	0.0810346
Timp4	NM_080639	0.729	-0.455	0.0153749	0.117573
Efnb1	NM_010110	0.729	-0.456	0.0265081	0.170196
Asf1a	NM_025541	0.729	-0.457	0.0444531	0.239148
Als2cl	NM_001146060	0.729	-0.456	0.102286	0.391093
Nipsnap3b	NM_025623	0.729	-0.455	0.382085	0.738903
Rgs17	NM_001161822	0.729	-0.456	0.428113	0.773186
Klhl32	NM_001163020	0.729	-0.456	0.475742	0.803101
Cr1l	NM_013499	0.73	-0.455	0.00725545	0.0685107
Hfe2	NM_027126	0.73	-0.454	0.00776362	0.0715656
Osbpl2	NM_144500	0.73	-0.454	0.00807905	0.0736667
Afg3l2	NM_027130	0.73	-0.454	0.00873907	0.0781194
Gm14420	NM_001177568	0.73	-0.453	0.0267399	0.17112
Mrps28	NM_025434	0.73	-0.454	0.047458	0.248217
6820408C15Rik	NM_177656	0.73	-0.455	0.200263	0.559254
Cd84	NM_013489	0.73	-0.454	0.36463	0.725909
Gm12409	NR_046068	0.73	-0.454	0.45607	0.792762
Ppa2	NM_146141	0.731	-0.452	0.0118572	0.0970329
Tie1	NM_011587	0.731	-0.451	0.0170023	0.125722
Mcc	NM_001085373	0.731	-0.452	0.0176821	0.129347
Pdss2	NM_001168289	0.731	-0.451	0.0268879	0.171585
Mipep	NR_040642	0.731	-0.453	0.0310053	0.190213
Ppat	NM_172146	0.731	-0.452	0.0563304	0.276686
Rorc	NM_011281	0.731	-0.452	0.0583255	0.28212
Sipa1	NM_001164481	0.731	-0.451	0.0589607	0.284186
Ccp110	NM_182995	0.731	-0.452	0.0953476	0.378121
Aim1	NM_172393	0.731	-0.452	0.120907	0.429881
Hook2	NM_133255	0.731	-0.452	0.20257	0.562007
Suclg1	NM_019879	0.732	-0.451	0.00796293	0.072949
Guf1	NM_172711	0.732	-0.449	0.0106673	0.0896198
Acad11	NM_175324	0.732	-0.45	0.0114725	0.0947938
Irak4	NM_029926	0.732	-0.45	0.0767438	0.33511
Pcdhgb1	NM_033574	0.732	-0.451	0.315127	0.687128
Nnat	NM_010923	0.732	-0.451	0.381375	0.738903
Sar1a	NM_009120	0.733	-0.448	0.00745605	0.0698525
Abca1	NM_013454	0.733	-0.449	0.0103304	0.0874209
9030617O03Rik	NM_145448	0.733	-0.448	0.0141423	0.11068
Papss2	NM_011864	0.733	-0.448	0.0161076	0.120873
Foxred1	NM_172291	0.733	-0.449	0.0230824	0.155439
Sar1b	NM_025535	0.733	-0.449	0.0263835	0.169872
Ndufb8	NM_026061	0.733	-0.448	0.0428271	0.232997
Aqp7	NM_007473	0.733	-0.448	0.0498846	0.256469
Tfb1m	NM_146074	0.733	-0.449	0.0940171	0.374515
P4htm	NM_028944	0.733	-0.448	0.187248	0.539959
Slfn5os	NR_045932	0.733	-0.448	0.386435	0.742934
Dld	NM_007861	0.734	-0.447	0.026073	0.168512
Hspa12b	NM_028306	0.734	-0.445	0.0296897	0.184631
Arhgap25	NM_175476	0.734	-0.445	0.156269	0.492968
Igsf1	NM_177591	0.735	-0.445	0.0734746	0.324888
Klf11	NM_178357	0.735	-0.445	0.116297	0.421521
Hrasls	NM_013751	0.735	-0.444	0.202628	0.562056
Robo4	NM_028783	0.736	-0.443	0.0465444	0.244965
Dock9	NM_001128307	0.737	-0.44	0.0120169	0.098046
Fgf13	NM_001290414	0.737	-0.439	0.0147915	0.114134
Naa20	NM_001141965	0.737	-0.441	0.0372173	0.212115
Med28	NM_025895	0.737	-0.439	0.0570706	0.278318
Agap2	NM_001033263	0.737	-0.439	0.0859453	0.356865
Pi15	NM_053191	0.737	-0.441	0.234216	0.602876
AI314180	NM_172381	0.738	-0.438	0.0103399	0.0874471
Ndufs1	NM_001160039	0.738	-0.438	0.0156072	0.118949
Zfp655	NM_001083958	0.738	-0.438	0.0255821	0.167079
Optn	NM_181848	0.738	-0.438	0.0303116	0.187219
Ndufaf1	NM_027175	0.738	-0.437	0.064974	0.300337
Prps1l3	NM_001037746	0.738	-0.438	0.11289	0.414365
Gdpd5	NM_201352	0.738	-0.438	0.134263	0.453525
Atad5	NM_001029856	0.738	-0.439	0.197799	0.555431
D030056L22Rik	NM_177640	0.738	-0.438	0.285674	0.657247
Rasd1	NM_009026	0.738	-0.439	0.314516	0.686466
Nthl1	NM_008743	0.738	-0.437	0.369272	0.728631
9130221H12Rik	NR_046001	0.738	-0.439	0.371252	0.730201
Wdr78	NM_146254	0.738	-0.438	0.407034	0.757191
Nepn	NM_025684	0.738	-0.439	0.456062	0.792762
Agt	NM_007428	0.738	-0.438	0.456811	0.792929
Phactr3	NM_001177790	0.738	-0.438	0.476978	0.804293
Ndufs5	NM_001030274	0.739	-0.436	0.0157569	0.119633
Stom	NM_013515	0.739	-0.436	0.0166195	0.123614
Hibch	NM_146108	0.739	-0.436	0.027314	0.173655
Asb5	NM_029569	0.739	-0.437	0.0421141	0.230589
Ndufb3	NM_025597	0.739	-0.436	0.0458736	0.243033
Fam161b	NM_172581	0.739	-0.437	0.0475389	0.248433
Alox12	NM_007440	0.739	-0.436	0.215716	0.580691
Nup43	NM_145706	0.739	-0.437	0.440591	0.783693
Zfp558	NM_028935	0.739	-0.437	0.44886	0.788423
Cfp	NM_008823	0.739	-0.437	0.458387	0.793799
Srpk2	NM_009274	0.74	-0.434	0.00961569	0.0828625
Adap2	NM_172133	0.74	-0.434	0.10916	0.405895
Oasl2	NM_011854	0.74	-0.434	0.133958	0.453406
Gm10052	NR_002885	0.74	-0.434	0.434686	0.778434
Zwilch	NM_026507	0.74	-0.435	0.438605	0.782156
Tmem170	NM_025781	0.74	-0.434	0.445254	0.78625
Oasl1	NM_145209	0.74	-0.435	0.461845	0.795578
Aoc2	NM_178932	0.74	-0.434	0.46974	0.799298
1700086O06Rik	NR_015475	0.74	-0.434	0.52934	0.833871
Gpsm1	NM_001199147	0.741	-0.432	0.00933435	0.0813107
Arhgap18	NM_176837	0.741	-0.432	0.0151993	0.116491
Ndufa12	NM_025551	0.741	-0.433	0.0189283	0.13492
Txlnb	NM_138628	0.741	-0.432	0.0348002	0.20361
Tmem220	NM_177392	0.741	-0.433	0.300653	0.673988
Psd3	NM_177698	0.742	-0.431	0.0136982	0.108394
Inpp5e	NM_001290437	0.742	-0.431	0.0653104	0.301586
Plekhh2	NM_177606	0.742	-0.431	0.0769781	0.335489
Gas1	NM_008086	0.742	-0.43	0.245309	0.615592
Tmem198b	NM_178066	0.742	-0.431	0.256119	0.628895
Fh1	NM_010209	0.743	-0.428	0.0143479	0.111595
Fabp4	NM_024406	0.743	-0.429	0.0219763	0.15097
Map4k2	NM_001291787	0.743	-0.429	0.0235455	0.156931
Phlpp1	NM_133821	0.743	-0.429	0.026054	0.168468
Gnb4	NM_013531	0.743	-0.428	0.0280047	0.176705
Sdhaf3	NM_001077713	0.743	-0.429	0.14136	0.468681
Glo1	NM_001113560	0.744	-0.426	0.022903	0.154828
Svip	NM_001160345	0.744	-0.426	0.0263287	0.169838
Rassf9	NM_146240	0.744	-0.427	0.0324193	0.195217
Bche	NM_009738	0.744	-0.428	0.0717692	0.319968
Zfp738	NM_001001187	0.744	-0.427	0.148513	0.480397
Pacs1	NM_153129	0.745	-0.424	0.0169899	0.125722
Fkbp8	NM_010223	0.745	-0.425	0.0252372	0.165381
Chchd7	NR_104355	0.745	-0.425	0.0301837	0.186682
Ccdc85a	NM_181577	0.745	-0.425	0.0388748	0.218731
Tdp2	NM_019551	0.745	-0.425	0.0618158	0.292372
Arl13b	NM_026577	0.745	-0.426	0.0680278	0.309677
Akap5	NM_001101471	0.745	-0.424	0.108185	0.404252
Slc25a30	NM_026232	0.745	-0.424	0.172919	0.519443
Marcks	NM_008538	0.746	-0.423	0.0149522	0.114944
Cox7b	NM_025379	0.746	-0.422	0.025381	0.166083
Yme1l1	NM_013771	0.746	-0.422	0.036531	0.209165
Tubgcp2	NM_133755	0.746	-0.422	0.0492366	0.254094
Trp53i11	NM_001025246	0.746	-0.423	0.056408	0.276868
Zfp128	NM_153802	0.746	-0.423	0.254993	0.62771
Slc18a2	NM_172523	0.746	-0.422	0.37378	0.733094
Prdx3	NM_007452	0.747	-0.42	0.0125606	0.101451
Ceacam1	NM_001039185	0.747	-0.42	0.01452	0.112612
Tmem258	NM_026919	0.747	-0.421	0.0719135	0.320267
Tspan15	NM_197996	0.747	-0.422	0.192425	0.547335
Plau	NM_008873	0.747	-0.421	0.389018	0.744679
Reps2	NM_178256	0.747	-0.421	0.396536	0.7501
2010107E04Rik	NM_027360	0.748	-0.419	0.014119	0.11068
Orc3	NM_015824	0.748	-0.419	0.0161759	0.121191
Emcn	NM_001163522	0.748	-0.419	0.0503498	0.257889
Abhd17c	NM_133722	0.748	-0.419	0.050557	0.258495
Inip	NM_001013577	0.748	-0.418	0.0806467	0.343365
Rfc4	NM_145480	0.748	-0.418	0.219558	0.584291
Nsun6	NM_001165941	0.748	-0.418	0.221508	0.587013
Sycp3	NM_011517	0.748	-0.418	0.402805	0.754698
Ecm2	NM_001012324	0.749	-0.417	0.0353802	0.205444
Tefm	NM_183275	0.749	-0.418	0.0649554	0.300337
Wipf1	NM_001289723	0.749	-0.418	0.0800392	0.342059
Zfp934	NM_175252	0.749	-0.417	0.426373	0.771269
Plekhn1	NM_001008233	0.749	-0.417	0.450221	0.789607
Mtmr7	NM_001040699	0.749	-0.417	0.451248	0.789953
Tnfrsf22	NM_023680	0.749	-0.417	0.515246	0.824804
Fcho2	NM_172591	0.75	-0.415	0.018133	0.131599
Cep85l	NM_001204983	0.75	-0.415	0.0190343	0.135392
Trim25	NM_009546	0.75	-0.416	0.0201427	0.141434
Pdk2	NM_133667	0.75	-0.415	0.0240819	0.159572
Gadd45a	NM_007836	0.75	-0.414	0.132428	0.450557
Grap	NM_027817	0.75	-0.416	0.134263	0.453525
Ssna1	NM_023464	0.75	-0.415	0.21684	0.581759
Dgkb	NM_178681	0.75	-0.414	0.309956	0.682623
Ilk	NM_010562	0.75	-0.414	0.323184	0.694965
Slc24a3	NM_053195	0.75	-0.415	0.340398	0.709271
Lrwd1	NM_027891	0.75	-0.415	0.350438	0.717047
Ift27	NM_025931	0.75	-0.415	0.443574	0.784909
Adamts14	NM_001081127	0.75	-0.414	0.484482	0.808654
Kcnip2	NM_145703	0.751	-0.413	0.012231	0.0992586
Asrgl1	NM_025610	0.751	-0.414	0.013804	0.108979
Gfod1	NM_001033399	0.751	-0.414	0.0230031	0.155089
Uvssa	NM_001081101	0.751	-0.413	0.0244615	0.16146
Hspa12a	NM_175199	0.751	-0.414	0.047201	0.247505
Polr2i	NM_027259	0.751	-0.413	0.122252	0.433007
Zfp748	NM_001035231	0.751	-0.414	0.183393	0.534897
Phf11c	NM_001164289	0.751	-0.413	0.379209	0.737455
Ivd	NM_019826	0.752	-0.411	0.017143	0.126327
Sncaip	NM_001199153	0.752	-0.41	0.0234872	0.15662
Clybl	NM_029556	0.752	-0.412	0.0259376	0.168114
Xdh	NM_011723	0.752	-0.412	0.0325338	0.195436
Gng11	NM_025331	0.752	-0.412	0.170431	0.515028
Mblac2	NM_028372	0.752	-0.412	0.177631	0.526757
Lrrc40	NM_024194	0.752	-0.411	0.202566	0.562007
Rpl24	NM_024218	0.752	-0.411	0.239297	0.608722
Entpd5	NM_001026214	0.753	-0.41	0.0125333	0.101291
Txn1	NM_011660	0.753	-0.409	0.0212846	0.147142
Cdh5	NM_009868	0.753	-0.409	0.0356291	0.20625
Malsu1	NM_029353	0.753	-0.41	0.131667	0.449168
Akna	NM_001045514	0.753	-0.41	0.18216	0.533237
Arhgap27	NM_001205236	0.753	-0.41	0.194549	0.550163
Relb	NM_001290457	0.753	-0.409	0.273712	0.645837
Efcab5	NM_176965	0.753	-0.409	0.330715	0.700195
Hbb-bs	NM_001201391	0.753	-0.41	0.692079	0.907656
Sdha	NM_023281	0.754	-0.407	0.0176666	0.129302
Zfp106	NM_011743	0.754	-0.408	0.0222798	0.152288
Tfam	NM_009360	0.754	-0.407	0.0312952	0.191218
Mospd1	NR_110964	0.754	-0.407	0.0376174	0.213425
Kdr	NM_010612	0.754	-0.407	0.0386345	0.217828
Vsig2	NM_020518	0.754	-0.407	0.11522	0.418952
Zfyve21	NM_026752	0.754	-0.407	0.173263	0.520361
Phf21b	NM_001081166	0.754	-0.407	0.237516	0.606113
Cmc4	NM_001294277	0.754	-0.408	0.39297	0.746644
Angel1	NM_144524	0.754	-0.407	0.423728	0.769645
Rab37	NM_021411	0.754	-0.408	0.488066	0.810563
Bscl2	NM_001136064	0.755	-0.405	0.134965	0.454881
Wrb	NM_207301	0.755	-0.406	0.157309	0.495236
Gimap5	NM_175035	0.755	-0.405	0.157297	0.495236
Sh3bgrl2	NM_172507	0.755	-0.405	0.197905	0.555492
Rbl1	NM_011249	0.755	-0.405	0.202824	0.56237
Med29	NM_026042	0.755	-0.406	0.227961	0.595989
Phf11b	NM_001164327	0.755	-0.406	0.545213	0.843517
Pyurf	NM_025574	0.756	-0.404	0.0139046	0.109393
Foxn2	NM_180974	0.756	-0.403	0.101503	0.390507
Gadd45gip1	NM_183358	0.756	-0.404	0.101994	0.390949
Rfesd	NM_001131068	0.756	-0.404	0.272272	0.644893
Map4k1	NM_008279	0.756	-0.403	0.582651	0.85934
Paip1	NM_001079849	0.757	-0.402	0.0247316	0.162849
Ppp2r3a	NM_001161362	0.757	-0.402	0.0521258	0.26333
Naa10	NM_019870	0.757	-0.401	0.102151	0.390978
Prorsd1	NM_001163454	0.757	-0.402	0.137058	0.459326
H2-T22	NM_010397	0.757	-0.402	0.143395	0.472618
Rhog	NM_019566	0.757	-0.402	0.240812	0.610426
Dcdc2b	NM_001195730	0.757	-0.401	0.55342	0.845217
Usp14	NM_021522	0.758	-0.401	0.0229123	0.154828
Lrch1	NM_001033439	0.758	-0.399	0.0265818	0.170508
Mrpl44	NM_001081210	0.758	-0.4	0.0902883	0.366251
Mtx1	NM_001161824	0.758	-0.4	0.14016	0.46562
Sars2	NM_023637	0.758	-0.4	0.176288	0.525172
AW146154	NM_001033530	0.758	-0.4	0.228633	0.596946
Epb41l4b	NM_019427	0.758	-0.4	0.262562	0.635007
Kif6	NM_177052	0.758	-0.401	0.306647	0.679369
6430710C18Rik	NR_102349	0.758	-0.4	0.382112	0.738903
Ntrk2	NM_001025074	0.758	-0.399	0.392251	0.746235
Ndufa10	NM_024197	0.759	-0.398	0.0217236	0.149535
Atp5a1	NM_007505	0.759	-0.399	0.0294943	0.184048
Tmed5	NM_028876	0.759	-0.397	0.0301694	0.186678
Fam195a	NM_026633	0.759	-0.399	0.0359956	0.207442
Atpaf1	NM_181040	0.759	-0.398	0.0585263	0.282758
Paqr4	NM_023824	0.759	-0.398	0.059992	0.287479
Dll4	NM_019454	0.759	-0.398	0.0645994	0.299908
Tmem243	NM_001081029	0.759	-0.398	0.153068	0.488245
Cyp2d22	NM_001163472	0.759	-0.398	0.156125	0.492741
Adprm	NM_025510	0.759	-0.397	0.159828	0.498093
Trnau1ap	NM_027925	0.759	-0.398	0.194552	0.550163
Mamstr	NM_172418	0.759	-0.398	0.400557	0.752803
Cdca4	NM_028023	0.759	-0.397	0.405565	0.756473
Slc37a1	NM_001242427	0.759	-0.397	0.42994	0.774266
Sypl	NM_013635	0.76	-0.396	0.0172576	0.126785
Sema6a	NM_018744	0.76	-0.396	0.0183602	0.132742
Tnks1bp1	NM_001081260	0.76	-0.396	0.0222402	0.15218
Grpel1	NM_024478	0.76	-0.397	0.0279878	0.176704
Egr1	NM_007913	0.76	-0.396	0.0281929	0.177342
Mrpl50	NM_178603	0.76	-0.395	0.032758	0.195945
Mrpl32	NM_029271	0.76	-0.395	0.0439074	0.237267
Txnrd2	NM_013711	0.76	-0.396	0.0528635	0.265974
Trdmt1	NM_010067	0.76	-0.395	0.117607	0.423906
Pgap1	NM_001163314	0.76	-0.396	0.1636	0.504988
Tcirg1	NM_016921	0.76	-0.395	0.219618	0.584291
Zfp444	NM_001146024	0.76	-0.396	0.250724	0.622485
Tsen2	NM_199033	0.76	-0.395	0.251308	0.623669
Ccpg1	NM_001286545	0.76	-0.396	0.340911	0.709402
0610009O20Rik	NM_024179	0.761	-0.395	0.015931	0.120342
Idh3a	NM_029573	0.761	-0.393	0.0211543	0.146651
Nae1	NM_144931	0.761	-0.394	0.0309045	0.189765
Fam160a1	NM_172682	0.761	-0.394	0.0340626	0.201192
Pnpla8	NM_026164	0.761	-0.394	0.037524	0.213361
Casp8	NM_001277926	0.761	-0.395	0.0682536	0.31045
Slc25a16	NM_175194	0.761	-0.394	0.0862482	0.357404
Pstpip2	NM_013831	0.761	-0.395	0.0959615	0.379564
Ddx59	NM_026500	0.761	-0.395	0.166552	0.510039
Pigv	NM_001145955	0.761	-0.395	0.173836	0.521449
Ccpg1os	NM_001198789	0.761	-0.394	0.201605	0.561271
Chst1	NM_023850	0.761	-0.394	0.390119	0.744857
Trim59	NM_025863	0.761	-0.394	0.538576	0.838932
D130040H23Rik	NM_172491	0.761	-0.393	0.545122	0.843517
Samm50	NM_178614	0.762	-0.391	0.016664	0.123756
Grb10	NM_010345	0.762	-0.392	0.0200712	0.141102
Pdhb	NM_024221	0.762	-0.393	0.0249817	0.1641
Rgs4	NM_009062	0.762	-0.393	0.0391021	0.219291
Ugp2	NM_139297	0.762	-0.393	0.0441563	0.238231
Arap3	NM_001205336	0.762	-0.392	0.0489993	0.253157
Art4	NM_026639	0.762	-0.392	0.0571868	0.278508
Cirbp	NM_007705	0.762	-0.392	0.0585403	0.282758
AW554918	NM_001033532	0.762	-0.391	0.0814109	0.345619
Mterf3	NM_025547	0.762	-0.393	0.0992454	0.386174
Haus3	NM_146159	0.762	-0.392	0.134741	0.454636
Elof1	NM_170777	0.762	-0.391	0.217052	0.581846
Ccdc189	NM_001033040	0.762	-0.391	0.25433	0.627017
AU041133	NM_001163064	0.762	-0.392	0.359535	0.723225
Fam129c	NM_001166213	0.762	-0.392	0.417934	0.765061
Tmem63b	NM_198167	0.763	-0.391	0.0193428	0.137158
Ptcd2	NM_026873	0.763	-0.39	0.0228452	0.154681
Epm2a	NM_010146	0.763	-0.391	0.0269946	0.172185
Adgrl4	NM_133222	0.763	-0.39	0.0316762	0.192597
Galnt15	NM_030166	0.763	-0.391	0.03415	0.201621
Emd	NM_007927	0.763	-0.39	0.0829867	0.350052
Phospho2	NM_028521	0.763	-0.39	0.0888136	0.362748
Eml2	NM_001162996	0.763	-0.39	0.163919	0.505285
BC002163	NR_002445	0.763	-0.391	0.187405	0.540087
Ube2s	NM_133777	0.763	-0.39	0.263204	0.635769
Dffb	NM_007859	0.763	-0.391	0.3104	0.68315
Nfia	NM_001122952	0.764	-0.388	0.0239221	0.158872
Fxr1	NM_001113188	0.764	-0.388	0.0408009	0.22557
Tmpo	NM_001080129	0.764	-0.389	0.0459698	0.243315
Pdhx	NM_175094	0.764	-0.389	0.0556129	0.274408
Tnfsf10	NM_009425	0.764	-0.389	0.0649106	0.300281
Dcun1d4	NM_001190734	0.764	-0.388	0.0650462	0.300569
Nqo1	NM_008706	0.764	-0.388	0.0826029	0.349276
Cyb5r2	NM_177216	0.764	-0.389	0.164583	0.506912
Wnt9a	NM_139298	0.764	-0.389	0.360229	0.723958
Gid8	NM_001289652	0.765	-0.387	0.0221826	0.152004
Mxi1	NM_010847	0.765	-0.387	0.0349074	0.203827
Mtrf1l	NM_175374	0.765	-0.386	0.0430959	0.233942
Siva1	NM_013929	0.765	-0.387	0.0546776	0.271648
Il2rg	NM_013563	0.765	-0.387	0.256559	0.62907
Sptbn2	NM_021287	0.765	-0.387	0.32806	0.699143
Zmym1	NM_026670	0.765	-0.386	0.42077	0.767257
Trap1	NM_026508	0.766	-0.385	0.0204246	0.142767
Ndufs4	NM_010887	0.766	-0.385	0.0207601	0.144506
Prdx1	NM_011034	0.766	-0.384	0.0225835	0.153518
Clcn3	NM_173874	0.766	-0.384	0.0229531	0.15495
Eif1	NM_011508	0.766	-0.384	0.0231621	0.155599
Setd3	NM_028262	0.766	-0.385	0.0233124	0.156146
Coro2b	NM_175484	0.766	-0.385	0.0518509	0.262719
Bloc1s1	NM_015740	0.766	-0.384	0.0829568	0.350034
Fahd1	NM_023480	0.766	-0.385	0.0839278	0.351955
1810030O07Rik	NM_175141	0.766	-0.385	0.0998266	0.387332
Trmt10b	NM_027266	0.766	-0.384	0.167968	0.51212
Ephb1	NM_173447	0.766	-0.384	0.184438	0.537016
Tead4	NM_011567	0.766	-0.385	0.216448	0.581597
Cd38	NM_007646	0.766	-0.384	0.217992	0.582087
Ifit3	NM_010501	0.766	-0.384	0.233049	0.601526
Zfp97	NM_011765	0.766	-0.385	0.244544	0.614851
Kcna1	NM_010595	0.766	-0.384	0.274875	0.64657
Zfp119a	NM_144546	0.766	-0.385	0.431982	0.776058
Ccdc64	NM_001080808	0.766	-0.385	0.482566	0.807233
Tmc4	NM_181820	0.766	-0.384	0.504839	0.819532
Hat1	NM_026115	0.767	-0.383	0.0686868	0.311694
Arhgap39	NM_001168288	0.767	-0.383	0.222079	0.588029
Gpr137b	NM_031999	0.767	-0.383	0.278327	0.650093
Tmco6	NM_028036	0.767	-0.382	0.509714	0.821537
D10Jhu81e	NM_138601	0.768	-0.381	0.0204618	0.142939
Vdac3	NM_001198998	0.768	-0.38	0.0253367	0.165953
Hmgn2	NM_016957	0.768	-0.381	0.0376191	0.213425
Pdha1	NM_008810	0.768	-0.38	0.040962	0.226073
Snai2	NM_011415	0.768	-0.38	0.105349	0.397873
Psmg2	NM_134138	0.768	-0.38	0.114995	0.418582
Gata2	NM_008090	0.768	-0.381	0.150043	0.483382
Dbndd2	NM_026797	0.768	-0.38	0.193119	0.548496
Acy1	NM_025371	0.768	-0.381	0.281592	0.653251
Gabre	NM_017369	0.768	-0.381	0.515989	0.825772
Mcee	NM_028626	0.769	-0.379	0.0220918	0.151534
Dtx3l	NM_001013371	0.769	-0.38	0.02602	0.16839
Opa1	NM_001199177	0.769	-0.379	0.0399782	0.223466
Cmtm6	NM_026036	0.769	-0.38	0.0650695	0.300575
Mrps9	NM_023514	0.769	-0.378	0.0674967	0.308343
Fam73b	NM_175392	0.769	-0.378	0.0894188	0.364499
Pstk	NM_001039534	0.769	-0.379	0.114267	0.4166
Zfp182	NM_001111076	0.769	-0.378	0.157597	0.495782
Nop9	NM_026403	0.769	-0.378	0.198946	0.557475
Tspan6	NM_019656	0.769	-0.38	0.243138	0.612897
Mettl15	NM_029790	0.769	-0.379	0.268534	0.641612
Trim34a	NM_030684	0.769	-0.379	0.340287	0.709256
Mfng	NM_008595	0.769	-0.379	0.433944	0.778055
Cdh6	NM_007666	0.769	-0.378	0.461642	0.795578
Slc23a1	NM_011397	0.769	-0.378	0.574608	0.854494
Mrps15	NM_025544	0.77	-0.377	0.0199245	0.140335
Kpna3	NM_008466	0.77	-0.377	0.0334303	0.198315
Ric1	NM_001081319	0.77	-0.377	0.0352547	0.205039
Slc25a46	NM_026165	0.77	-0.376	0.0391029	0.219291
Ccdc90b	NM_025515	0.77	-0.376	0.0635074	0.296284
Lpcat3	NM_145130	0.77	-0.377	0.171642	0.517427
Tmem260	NM_001310584	0.77	-0.377	0.220666	0.585553
Rpgrip1l	NM_173431	0.77	-0.376	0.248834	0.620646
Fam171b	NM_175514	0.77	-0.378	0.482163	0.807062
Lrat	NM_023624	0.77	-0.377	0.577619	0.85677
Gys1	NM_030678	0.771	-0.376	0.030295	0.187201
Lgals8	NM_001199043	0.771	-0.376	0.03215	0.194439
Khdrbs3	NM_010158	0.771	-0.375	0.0364293	0.209021
Psmg4	NM_001101430	0.771	-0.376	0.0709598	0.318095
Ccdc146	NM_029195	0.771	-0.376	0.153127	0.488245
Sema4c	NM_001304330	0.771	-0.375	0.163098	0.504599
Dusp19	NM_024438	0.771	-0.375	0.293499	0.66575
Kcnq4	NM_001081142	0.771	-0.376	0.331534	0.700716
Arhgap27os3	NR_045346	0.771	-0.375	0.53609	0.837066
Ptpn3	NM_011207	0.772	-0.374	0.0345961	0.202764
Trim24	NM_001272064	0.772	-0.372	0.0358238	0.206938
Atp5f1	NM_001304719	0.772	-0.373	0.0404866	0.224547
Itpkb	NM_001081175	0.772	-0.374	0.0441192	0.238129
Maf1	NM_001164607	0.772	-0.374	0.0519312	0.262833
Trim63	NM_001039048	0.772	-0.374	0.0639675	0.297613
Fam13c	NM_001143777	0.772	-0.373	0.10804	0.404041
Zfp263	NM_148924	0.772	-0.373	0.117373	0.423735
Hgsnat	NM_029884	0.772	-0.374	0.163414	0.504889
Zfp933	NM_198619	0.772	-0.373	0.164588	0.506912
Pid1	NM_001003948	0.772	-0.373	0.266965	0.639759
Myom3	NM_001085509	0.772	-0.374	0.335189	0.704114
Smim8	NM_025471	0.773	-0.372	0.0351349	0.204604
B4gat1	NM_175383	0.773	-0.372	0.060467	0.288704
Gdpd3	NM_024228	0.773	-0.371	0.107808	0.403503
Gm15787	NR_040431	0.773	-0.371	0.181487	0.532384
Cenpe	NM_173762	0.773	-0.372	0.212586	0.575502
Nt5m	NM_134029	0.773	-0.371	0.237136	0.605828
Det1	NM_029585	0.773	-0.372	0.256226	0.629043
Zfp747	NM_175560	0.773	-0.372	0.275505	0.646784
Mir3060	NR_037220	0.773	-0.371	0.61726	0.875703
Ndufv1	NM_133666	0.774	-0.369	0.0324528	0.195318
Cd47	NM_010581	0.774	-0.37	0.032639	0.195768
Adamts9	NM_175314	0.774	-0.37	0.0343591	0.202106
P2ry1	NM_008772	0.774	-0.37	0.0828118	0.349636
Gpihbp1	NM_026730	0.774	-0.369	0.0847585	0.354318
Dek	NM_025900	0.774	-0.369	0.111612	0.412091
Mcm7	NM_008568	0.774	-0.369	0.1603	0.499152
Zfp930	NM_001013379	0.774	-0.369	0.236651	0.605397
Xylt2	NM_145828	0.774	-0.369	0.236625	0.605397
4931414P19Rik	NM_028890	0.774	-0.37	0.257	0.629259
Nudt22	NM_026675	0.774	-0.37	0.364957	0.725909
Sec14l5	NM_001127725	0.774	-0.37	0.451369	0.789953
Gpr19	NM_001167700	0.774	-0.369	0.59783	0.867664
Acta2	NM_007392	0.775	-0.368	0.0257374	0.16754
Rps13	NM_026533	0.775	-0.367	0.0257744	0.167614
Lifr	NM_013584	0.775	-0.367	0.0296461	0.184528
Capn7	NM_009796	0.775	-0.368	0.0333858	0.198224
Emc9	NM_033146	0.775	-0.368	0.0566945	0.277476
D930015E06Rik	NM_172681	0.775	-0.367	0.0687921	0.311788
Mtf2	NR_045608	0.775	-0.367	0.0837298	0.351557
Cntln	NM_175275	0.775	-0.368	0.0929742	0.372278
Tomm5	NM_001134646	0.775	-0.367	0.0942796	0.375061
Fam78b	NM_001160262	0.775	-0.368	0.180315	0.53011
Hps6	NM_176785	0.775	-0.368	0.36269	0.725009
Rrm2	NM_009104	0.775	-0.367	0.511352	0.822346
Gnrh1	NM_008145	0.775	-0.368	0.582077	0.85905
Atp5b	NM_016774	0.776	-0.365	0.0303963	0.187572
Sdhc	NM_025321	0.776	-0.366	0.0305471	0.188077
Ndufa5	NM_026614	0.776	-0.365	0.0459892	0.243315
Zfp950	NR_131953	0.776	-0.367	0.0466325	0.245199
Atp5e	NM_025983	0.776	-0.366	0.118636	0.425928
Zbtb14	NM_009547	0.776	-0.366	0.11954	0.427489
Sec31b	NM_001033343	0.776	-0.365	0.122912	0.43375
4930481A15Rik	NR_015545	0.776	-0.365	0.173647	0.521054
Zkscan14	NM_023322	0.776	-0.366	0.243999	0.61416
Pold1	NM_011131	0.776	-0.365	0.420698	0.767257
Higd1b	NM_080846	0.776	-0.366	0.444511	0.785848
Dgkg	NM_138650	0.776	-0.366	0.511992	0.822346
Crat	NM_007760	0.777	-0.365	0.0274326	0.174165
Mios	NM_145374	0.777	-0.364	0.0361428	0.207988
Map4k3	NM_001290345	0.777	-0.365	0.0419244	0.230011
Dus2	NM_025518	0.777	-0.364	0.233834	0.602461
Rpa2	NM_011284	0.777	-0.364	0.275434	0.646784
Psmb8	NM_010724	0.777	-0.363	0.291815	0.663437
Cmtr1	NM_028791	0.777	-0.364	0.379511	0.737584
Gm12216	NR_033332	0.777	-0.364	0.550918	0.844473
Slc26a3	NM_021353	0.777	-0.364	0.706881	0.91392
Pcca	NM_144844	0.778	-0.363	0.0295016	0.184048
Vps35	NM_022997	0.778	-0.363	0.0331191	0.197047
Gdi2	NM_008112	0.778	-0.362	0.0569397	0.27811
Mrps35	NM_145573	0.778	-0.362	0.0617319	0.292077
9430020K01Rik	NM_001081963	0.778	-0.363	0.0666611	0.305651
Ankrd26	NM_001081112	0.778	-0.362	0.100876	0.389082
Tspan2	NM_027533	0.778	-0.361	0.157135	0.495128
Znrd1	NM_023162	0.778	-0.363	0.176391	0.525214
Carf	NM_001285463	0.778	-0.361	0.223771	0.590099
Itgb3bp	NM_026348	0.778	-0.362	0.373428	0.732791
Cped1	NM_001081351	0.779	-0.36	0.0328265	0.196126
Ndufa13	NM_023312	0.779	-0.361	0.0338835	0.200307
Phldb1	NM_153537	0.779	-0.361	0.0351181	0.204593
Fbxo21	NM_145564	0.779	-0.36	0.053934	0.26955
Trmt5	NM_029580	0.779	-0.361	0.0569504	0.27811
Nbn	NM_013752	0.779	-0.36	0.058849	0.284048
Uqcrfs1	NM_025710	0.779	-0.36	0.0762322	0.333302
Rsbn1	NM_172684	0.779	-0.36	0.118577	0.425831
4930429F24Rik	NR_040734	0.779	-0.36	0.123449	0.434746
Morc4	NM_001193309	0.779	-0.361	0.185432	0.538085
Stk17b	NM_133810	0.779	-0.36	0.194114	0.549751
Gm14085	NM_001085518	0.779	-0.36	0.333192	0.702045
Zfp2	NM_178447	0.779	-0.36	0.362766	0.725009
Shkbp1	NM_138676	0.779	-0.36	0.438515	0.782156
Erg	NM_001302152	0.78	-0.358	0.0386736	0.217958
Rnf144a	NM_001081977	0.78	-0.359	0.0401594	0.224013
Psma6	NM_011968	0.78	-0.359	0.0408006	0.22557
Cox6c	NM_053071	0.78	-0.359	0.0662092	0.304397
Slc43a3	NM_021398	0.78	-0.359	0.0767271	0.33511
Rock1	NM_009071	0.78	-0.358	0.0801562	0.342164
Isoc2a	NM_001101598	0.78	-0.358	0.135125	0.455308
Plekhf1	NM_024413	0.78	-0.359	0.176404	0.525214
2810025M15Rik	NR_027984	0.78	-0.359	0.192928	0.548094
G6pc3	NM_175935	0.78	-0.359	0.238978	0.608513
Zfp961	NM_001164581	0.78	-0.359	0.270696	0.643617
Ppp1r16a	NM_033371	0.78	-0.359	0.280637	0.6527
Zfp39	NM_011758	0.78	-0.358	0.28709	0.658508
Suv39h2	NM_022724	0.78	-0.358	0.400749	0.752955
Pde4a	NM_001310750	0.781	-0.357	0.037185	0.21202
Smpdl3a	NM_020561	0.781	-0.357	0.0569066	0.27811
Arl4a	NM_001039515	0.781	-0.357	0.057164	0.278508
Uqcrc2	NM_025899	0.781	-0.357	0.0715171	0.319221
Uba52	NM_019883	0.781	-0.357	0.121	0.429916
Prex1	NM_177782	0.781	-0.356	0.135166	0.455335
Mertk	NM_008587	0.781	-0.356	0.174893	0.523048
Ankrd29	NM_001190371	0.781	-0.357	0.316114	0.687374
Sfxn4	NM_053198	0.781	-0.357	0.326397	0.69753
Gimap4	NM_175048	0.782	-0.354	0.0324217	0.195217
Slc35e1	NM_177766	0.782	-0.355	0.0329581	0.196337
Stau2	NM_025303	0.782	-0.355	0.0350739	0.204423
Tek	NM_013690	0.782	-0.355	0.0448545	0.239915
Ptbp3	NM_144904	0.782	-0.354	0.0501601	0.257401
Dimt1	NM_025447	0.782	-0.355	0.334169	0.702837
Zfp354b	NM_013744	0.782	-0.354	0.382027	0.738903
Slc15a3	NM_023044	0.782	-0.355	0.399887	0.752523
Ank1	NR_102385	0.783	-0.354	0.0353845	0.205444
Eci2	NM_001110331	0.783	-0.353	0.0367532	0.21026
Ppip5k1	NM_178795	0.783	-0.353	0.0461586	0.243739
Ndufv2	NM_001278415	0.783	-0.352	0.0476813	0.248913
Elovl5	NM_134255	0.783	-0.354	0.0491349	0.253666
Timm23	NM_016897	0.783	-0.353	0.0713049	0.318714
Cdc40	NM_027879	0.783	-0.353	0.0773117	0.336299
Pcdh1	NM_029357	0.783	-0.353	0.0958538	0.379357
Lyrm2	NM_175364	0.783	-0.353	0.133588	0.452701
Gtf3c5	NM_148928	0.783	-0.353	0.166433	0.510039
Pafah2	NM_133880	0.783	-0.352	0.215044	0.579652
Mtcp1	NM_001039373	0.783	-0.353	0.274314	0.64657
Rpa3	NM_026632	0.783	-0.352	0.348151	0.714679
Plxdc1	NM_001163608	0.783	-0.352	0.35241	0.718399
Chchd6	NM_025351	0.783	-0.353	0.459738	0.794156
Tmem39b	NM_199305	0.783	-0.352	0.471148	0.799936
Agmo	NM_178767	0.783	-0.353	0.516824	0.826362
Cmpk1	NM_025647	0.784	-0.352	0.0794138	0.340414
Flt1	NM_010228	0.784	-0.35	0.0937242	0.373965
B3galnt2	NM_178640	0.784	-0.351	0.134479	0.454027
Slc11a2	NM_008732	0.784	-0.352	0.158847	0.497264
Cdc42ep4	NM_001163346	0.784	-0.35	0.244829	0.615115
Mpp3	NM_007863	0.784	-0.351	0.35659	0.721643
A930005H10Rik	NR_027894	0.784	-0.351	0.362126	0.725009
Zfp85	NM_001001130	0.784	-0.351	0.383922	0.740922
Rab34	NM_001159482	0.784	-0.351	0.444343	0.785659
Muc1	NM_013605	0.784	-0.35	0.555479	0.846035
Rragd	NM_027491	0.785	-0.349	0.0323737	0.1951
Gid4	NM_025757	0.785	-0.349	0.0344566	0.202555
Wasf2	NM_153423	0.785	-0.349	0.0580291	0.280985
Zfp945	NM_177358	0.785	-0.35	0.0589391	0.284186
Ppp2r3c	NM_021529	0.785	-0.349	0.0788353	0.339464
Casp8ap2	NM_011997	0.785	-0.349	0.07943	0.340414
Mrps27	NM_173757	0.785	-0.349	0.0806342	0.343365
Akap10	NM_019921	0.785	-0.35	0.0843882	0.353343
Hdac4	NM_207225	0.785	-0.349	0.102274	0.391093
Prodh	NM_011172	0.785	-0.349	0.113305	0.415088
Fpgs	NM_010236	0.785	-0.349	0.360999	0.724472
Fam229b	NM_183254	0.785	-0.35	0.494197	0.813513
Nod2	NM_145857	0.785	-0.349	0.532251	0.834958
Rab10	NM_016676	0.786	-0.348	0.0483892	0.251129
Fktn	NM_139309	0.786	-0.347	0.0531645	0.266996
Ncoa3	NM_008679	0.786	-0.348	0.0685047	0.311385
Scd1	NM_009127	0.786	-0.347	0.0879105	0.361113
Mrps30	NM_021556	0.786	-0.348	0.0911312	0.367971
Ift57	NM_028680	0.786	-0.347	0.126618	0.440213
Cyp2u1	NM_027816	0.786	-0.347	0.275967	0.64713
Gm9855	NR_037190	0.786	-0.348	0.416555	0.763992
Tmem97	NM_133706	0.786	-0.348	0.562186	0.849852
Rab28	NM_027295	0.787	-0.345	0.0364187	0.209021
Jak2	NM_008413	0.787	-0.345	0.0431673	0.234195
Sri	NM_001080974	0.787	-0.346	0.0451045	0.240781
Arhgap5	NM_009706	0.787	-0.345	0.0673953	0.307983
Shroom4	NM_001313764	0.787	-0.346	0.0776044	0.337174
Derl2	NM_033562	0.787	-0.345	0.0846993	0.354211
Lin54	NM_001115010	0.787	-0.345	0.135546	0.455882
Ublcp1	NM_024475	0.787	-0.346	0.157315	0.495236
AW112010	NR_102366	0.787	-0.346	0.205587	0.565649
Prdm15	NM_144789	0.787	-0.346	0.206025	0.565957
Rnf170	NM_029965	0.787	-0.345	0.236932	0.605754
Gsdmd	NM_026960	0.787	-0.346	0.279924	0.6518
Kif20b	NM_183046	0.787	-0.345	0.292587	0.664306
Uxt	NM_013840	0.787	-0.346	0.336369	0.705507
Car7	NM_001301165	0.787	-0.345	0.387753	0.743998
Ckap2	NM_001004140	0.787	-0.345	0.553125	0.845213
Smarca5	NM_053124	0.788	-0.344	0.0355589	0.206187
Rapgef5	NM_175930	0.788	-0.344	0.0405006	0.224547
Cops4	NM_012001	0.788	-0.344	0.040713	0.225449
Sdhb	NM_023374	0.788	-0.343	0.0421972	0.230858
Crbn	NM_021449	0.788	-0.344	0.043322	0.234847
Fbxo3	NM_212433	0.788	-0.345	0.0573036	0.278885
Mrvi1	NM_194464	0.788	-0.344	0.0854912	0.35541
Nkap	NM_025937	0.788	-0.343	0.133726	0.453057
Nagk	NM_019542	0.788	-0.344	0.180402	0.530251
Psme2b	NM_001281472	0.788	-0.344	0.263621	0.636223
Dand5	NM_201227	0.788	-0.344	0.269355	0.6418
Tmem177	NM_175106	0.788	-0.344	0.312941	0.68607
E2f5	NM_007892	0.788	-0.344	0.366308	0.726496
Gper1	NM_029771	0.788	-0.344	0.511643	0.822346
Ccl11	NM_011330	0.788	-0.343	0.564698	0.850974
Fam126a	NM_053090	0.789	-0.342	0.0423139	0.231209
Mrpl39	NM_017404	0.789	-0.342	0.0466764	0.245334
Adam10	NM_007399	0.789	-0.342	0.0483645	0.251113
Ccdc127	NM_001168658	0.789	-0.342	0.0526601	0.265244
Dennd4c	NM_184088	0.789	-0.342	0.0530503	0.266521
Ccdc88c	NM_026681	0.789	-0.342	0.0637027	0.296772
Lrpprc	NM_028233	0.789	-0.341	0.0834846	0.351269
Gfm1	NM_138591	0.789	-0.343	0.0874213	0.35997
Tstd3	NM_029840	0.789	-0.343	0.108447	0.404564
Tkfc	NM_145496	0.789	-0.342	0.28106	0.652728
Cmtm3	NM_024217	0.789	-0.343	0.284263	0.656205
Mamdc2	NM_174857	0.789	-0.342	0.3937	0.74722
4930402H24Rik	NM_029432	0.79	-0.341	0.0474044	0.248217
Ezh1	NM_007970	0.79	-0.34	0.0543017	0.270518
Rnf128	NM_001254761	0.79	-0.34	0.0569666	0.27811
Sh3kbp1	NM_001135727	0.79	-0.34	0.0637338	0.296815
Bcap29	NM_001164090	0.79	-0.341	0.131233	0.448785
Agk	NM_023538	0.79	-0.34	0.169328	0.513961
Maml3	NM_001004176	0.79	-0.341	0.198168	0.555669
Dock11	NM_001009947	0.79	-0.34	0.212351	0.575101
Sass6	NM_001289568	0.79	-0.341	0.322152	0.69403
Tbc1d30	NM_029057	0.79	-0.34	0.504422	0.819265
Spag1	NM_012031	0.79	-0.34	0.506689	0.819532
Cep68	NM_172260	0.791	-0.338	0.0403974	0.224547
Diaph2	NM_172493	0.791	-0.338	0.0503387	0.257889
Vps54	NM_139061	0.791	-0.338	0.0517153	0.262324
Rfwd2	NM_011931	0.791	-0.339	0.0573843	0.27915
Tfb2m	NM_008249	0.791	-0.338	0.0776611	0.337174
Sox6	NM_011445	0.791	-0.338	0.0826237	0.349276
Acad12	NM_178799	0.791	-0.339	0.111927	0.412698
Noct	NM_009834	0.791	-0.339	0.140866	0.467385
Nos2	NM_010927	0.791	-0.339	0.198145	0.555669
Fam107a	NM_183187	0.791	-0.338	0.304835	0.678349
Trmt11	NM_028604	0.791	-0.339	0.3348	0.703745
Garnl3	NM_178888	0.791	-0.339	0.430237	0.774563
Trp63	NM_001127259	0.791	-0.339	0.455575	0.792408
Sgip1	NM_001285852	0.791	-0.338	0.457578	0.793337
Fggy	NM_001113412	0.791	-0.339	0.489611	0.811166
C5ar2	NM_001146005	0.791	-0.338	0.538575	0.838932
Uhrf1	NM_001111078	0.791	-0.338	0.5692	0.851928
Gstt3	NM_133994	0.791	-0.338	0.602531	0.869403
Itga6	NM_008397	0.792	-0.336	0.0481268	0.250355
Pds5a	NM_001081321	0.792	-0.337	0.0488469	0.252806
Dnaja3	NM_023646	0.792	-0.336	0.0657479	0.302885
Dpf3	NM_001267625	0.792	-0.337	0.0976502	0.382695
Ppp1r14c	NM_133485	0.792	-0.337	0.114369	0.416748
Fahd2a	NM_029629	0.792	-0.336	0.17742	0.526589
Spry1	NM_011896	0.792	-0.336	0.205309	0.565649
Ston1	NM_029858	0.792	-0.336	0.229564	0.598311
Zfp775	NM_173429	0.792	-0.337	0.241821	0.611951
Srprb	NM_009275	0.792	-0.336	0.260317	0.632266
6820431F20Rik	NR_030708	0.792	-0.336	0.280283	0.651988
Sh3tc1	NM_194344	0.792	-0.336	0.315369	0.687128
Ndufa4l2	NM_001098789	0.792	-0.336	0.403377	0.755191
Ndufc2	NM_024220	0.793	-0.335	0.0458825	0.243033
Gab1	NM_001301298	0.793	-0.334	0.0635681	0.296347
Rufy1	NM_172557	0.793	-0.334	0.0926418	0.371166
Pygo1	NM_028116	0.793	-0.335	0.115655	0.419866
Cep135	NM_199032	0.793	-0.335	0.119628	0.427579
Msh2	NM_008628	0.793	-0.334	0.127408	0.441514
Cycs	NM_007808	0.793	-0.335	0.128026	0.442641
Zfp788	NM_023363	0.793	-0.335	0.215746	0.580691
AI607873	NM_001204910	0.793	-0.334	0.289362	0.661275
Exosc5	NM_138586	0.793	-0.334	0.52898	0.83377
4921507P07Rik	NM_027564	0.793	-0.334	0.570776	0.853164
Sdhd	NM_025848	0.794	-0.334	0.0428173	0.232997
Scarb2	NM_007644	0.794	-0.333	0.0477432	0.249098
Taldo1	NM_011528	0.794	-0.332	0.0576952	0.279865
Bcas2	NM_026602	0.794	-0.333	0.0624612	0.293642
Fam120b	NM_024203	0.794	-0.334	0.066243	0.30445
2900076A07Rik	NR_045299	0.794	-0.332	0.0690553	0.312431
Parp14	NM_001039530	0.794	-0.333	0.0703496	0.316191
Hspa5	NM_001163434	0.794	-0.333	0.0971902	0.381724
Wrnip1	NM_030215	0.794	-0.333	0.108852	0.40541
Vbp1	NM_011692	0.794	-0.334	0.176737	0.525704
Ly6c1	NM_001252056	0.794	-0.334	0.209229	0.570624
Fopnl	NM_025345	0.794	-0.332	0.238078	0.606859
Rtp4	NM_023386	0.794	-0.333	0.316505	0.687856
Zfp235	NM_019941	0.794	-0.334	0.356645	0.721643
Sowahc	NM_172939	0.794	-0.332	0.411557	0.760631
Pmpcb	NM_028431	0.795	-0.331	0.0515797	0.262
Egln3	NM_028133	0.795	-0.331	0.0516582	0.262229
Ggct	NM_026637	0.795	-0.331	0.0687989	0.311788
Atpif1	NM_007512	0.795	-0.332	0.0688276	0.311815
Npc1	NM_008720	0.795	-0.331	0.0772806	0.336299
Selt	NM_001040396	0.795	-0.33	0.0808022	0.343812
Amd1	NM_009665	0.795	-0.331	0.0881006	0.361135
Lrrc4b	NM_198250	0.795	-0.332	0.104899	0.396642
Ebf2	NM_010095	0.795	-0.331	0.222425	0.588069
Casp7	NM_007611	0.795	-0.331	0.245386	0.615608
Etaa1	NM_026576	0.795	-0.33	0.256974	0.629259
Tmem35	NM_026239	0.795	-0.331	0.591251	0.863995
Chac1	NM_026929	0.795	-0.33	0.64963	0.890127
Ndufa4	NM_010886	0.796	-0.329	0.0535623	0.268303
Ptprm	NM_008984	0.796	-0.329	0.0556663	0.274511
Rtn4ip1	NM_130892	0.796	-0.329	0.0742613	0.326884
Abcb8	NM_029020	0.796	-0.33	0.158512	0.496714
3830406C13Rik	NM_001284387	0.796	-0.33	0.215979	0.580694
Yif1a	NM_026553	0.796	-0.329	0.229371	0.598072
Cd109	NM_153098	0.796	-0.329	0.324253	0.695618
Reln	NM_011261	0.796	-0.33	0.366991	0.726952
Smap2	NM_133716	0.797	-0.328	0.0479149	0.249538
Car8	NM_007592	0.797	-0.327	0.0532144	0.267149
Osbpl1a	NM_207530	0.797	-0.327	0.0635328	0.296284
Prex2	NM_029525	0.797	-0.327	0.0763726	0.333809
Plxnd1	NM_026376	0.797	-0.327	0.0948344	0.376743
Cox7c	NM_007749	0.797	-0.328	0.0999368	0.387539
Nqo2	NM_020282	0.797	-0.327	0.100168	0.387661
S1pr1	NM_007901	0.797	-0.327	0.10985	0.406856
Zfp280c	NM_001166649	0.797	-0.328	0.110983	0.410215
Tmem126b	NM_026734	0.797	-0.328	0.135534	0.455882
Nim1k	NM_175538	0.797	-0.328	0.182665	0.534142
Rhoj	NM_023275	0.797	-0.328	0.185071	0.537379
Slc25a26	NM_026255	0.797	-0.327	0.228156	0.596272
Cecr5	NM_144815	0.797	-0.327	0.240995	0.610426
Pde8b	NM_172263	0.797	-0.327	0.385664	0.742185
Timd4	NM_178759	0.797	-0.327	0.453773	0.791667
3110035E14Rik	NM_178399	0.797	-0.327	0.568362	0.851727
Pygm	NM_011224	0.798	-0.326	0.0579518	0.28081
Dnajc25	NM_001033165	0.798	-0.325	0.0939708	0.374515
Ciao1	NM_025296	0.798	-0.325	0.113941	0.416384
Slc30a1	NM_009579	0.798	-0.326	0.119316	0.42732
Cenpj	NM_001014996	0.798	-0.325	0.147141	0.478778
Zfp518b	NM_001081144	0.798	-0.325	0.209575	0.571111
Dtwd1	NM_026981	0.798	-0.326	0.335909	0.705163
Ccdc30	NM_029286	0.798	-0.325	0.578033	0.857065
Fyn	NM_001122893	0.799	-0.323	0.0490967	0.253564
Mdh2	NM_008617	0.799	-0.324	0.0545497	0.271159
Acads	NM_007383	0.799	-0.324	0.0663842	0.304816
Lmo7	NM_201529	0.799	-0.324	0.0702908	0.316073
Tmem201	NM_001284270	0.799	-0.323	0.0710282	0.318193
N4bp2	NM_001024917	0.799	-0.323	0.0967322	0.380838
Mtif2	NM_001282120	0.799	-0.323	0.101972	0.390949
Anapc16	NM_025514	0.799	-0.323	0.103098	0.392986
Zfp639	NM_144519	0.799	-0.324	0.1321	0.450117
1110008F13Rik	NM_026124	0.799	-0.325	0.158118	0.496233
Fmo5	NM_010232	0.799	-0.324	0.19078	0.544685
Tmem88	NM_025915	0.799	-0.323	0.393419	0.746823
Col20a1	NM_028518	0.799	-0.323	0.457577	0.793337
3300002I08Rik	NM_027017	0.799	-0.324	0.637059	0.884143
Ginm1	NM_145418	0.8	-0.322	0.0554326	0.273853
Myh14	NM_001271540	0.8	-0.322	0.0576699	0.279842
Ckap5	NM_001165989	0.8	-0.322	0.0592813	0.285127
Yae1d1	NM_025904	0.8	-0.321	0.0630857	0.295621
Cnst	NM_146105	0.8	-0.323	0.064134	0.298272
Lama2	NM_008481	0.8	-0.321	0.0707239	0.317307
2900097C17Rik	NR_024329	0.8	-0.321	0.0868857	0.359387
Pde7a	NM_001122759	0.8	-0.321	0.11613	0.42103
Ngrn	NM_031375	0.8	-0.322	0.130291	0.447414
Cul2	NM_029402	0.8	-0.323	0.131746	0.449247
Csgalnact1	NM_001252623	0.8	-0.322	0.232147	0.601526
Fastkd3	NM_027123	0.8	-0.322	0.397697	0.750969
Exoc3l	NM_177788	0.8	-0.323	0.459957	0.794334
Tox2	NM_001098799	0.8	-0.323	0.460458	0.794618
Timm8a1	NM_013898	0.8	-0.322	0.475044	0.802618
Irak1bp1	NM_022986	0.8	-0.321	0.506205	0.819532
Cxcl1	NM_008176	0.8	-0.322	0.583646	0.859791
Zfp119b	NM_146249	0.8	-0.322	0.591097	0.86393
Gltscr2	NM_133831	0.801	-0.32	0.0587986	0.283906
Slc25a12	NM_172436	0.801	-0.32	0.0616014	0.291932
Nes	NM_016701	0.801	-0.32	0.0777641	0.337378
Hook1	NM_030014	0.801	-0.32	0.0918002	0.36942
Ctnnd1	NM_007615	0.801	-0.32	0.189896	0.543058
Rsl24d1	NM_198609	0.801	-0.32	0.218957	0.583629
Zkscan17	NM_001130529	0.801	-0.319	0.268258	0.641612
BC028528	NM_153513	0.801	-0.32	0.317878	0.689173
Rbm12b2	NM_198957	0.801	-0.32	0.363225	0.725009
Ctf1	NM_007795	0.801	-0.32	0.409439	0.759147
Pir	NM_027153	0.801	-0.32	0.423509	0.769645
Gab3	NM_181584	0.801	-0.32	0.537896	0.838477
Xiap	NM_009688	0.802	-0.318	0.0574115	0.279183
Phf14	NM_001168382	0.802	-0.317	0.102019	0.390949
2610008E11Rik	NM_001004362	0.802	-0.318	0.138671	0.462689
Fam213b	NM_025582	0.802	-0.319	0.163584	0.504988
Bcl2l1	NM_001289739	0.802	-0.318	0.245088	0.615312
Tor4a	NM_146115	0.802	-0.319	0.328624	0.699383
Lyrm1	NM_001285961	0.802	-0.318	0.359455	0.723225
Lrfn4	NM_153388	0.802	-0.319	0.449448	0.789063
Gm527	NM_001025605	0.802	-0.318	0.462018	0.795578
Foxm1	NM_008021	0.802	-0.318	0.504405	0.819265
Phb2	NM_007531	0.803	-0.317	0.0595838	0.286279
Grsf1	NM_178700	0.803	-0.317	0.0697167	0.314381
Sox7	NM_011446	0.803	-0.317	0.0705821	0.316923
Slfn5	NM_183201	0.803	-0.316	0.0828369	0.349636
Cmc2	NM_026844	0.803	-0.316	0.148047	0.480136
AW209491	NM_134067	0.803	-0.317	0.169853	0.514408
Zfp57	NM_001168502	0.803	-0.317	0.417899	0.765061
Pitpnc1	NM_145823	0.804	-0.314	0.0619317	0.292616
Nudt4	NM_027722	0.804	-0.315	0.0626996	0.294195
Zfand6	NM_022985	0.804	-0.315	0.0634366	0.296284
Dym	NM_027727	0.804	-0.316	0.0680382	0.309677
Pgrmc1	NM_016783	0.804	-0.315	0.0922455	0.370561
Txnl4a	NM_025299	0.804	-0.315	0.104409	0.396323
Myo1d	NM_177390	0.804	-0.315	0.107308	0.402296
Fbxo45	NM_173439	0.804	-0.314	0.115937	0.420554
Bcl7a	NM_029850	0.804	-0.315	0.125572	0.439166
Cog6	NM_026225	0.804	-0.315	0.125837	0.439268
Snrpa1	NM_021336	0.804	-0.315	0.133296	0.452271
Fastkd2	NM_172422	0.804	-0.314	0.153925	0.489367
Nrd1	NM_146150	0.804	-0.315	0.159351	0.497738
Mospd2	NM_029730	0.804	-0.315	0.168412	0.512787
Snhg1	NR_002896	0.804	-0.315	0.299161	0.67213
Irx2	NM_010574	0.804	-0.315	0.316137	0.687374
Sh3d21	NM_001162533	0.804	-0.315	0.321572	0.693657
Mpst	NM_001162492	0.804	-0.315	0.357571	0.72219
Parvg	NM_022321	0.804	-0.315	0.501168	0.817803
Pced1b	NM_172293	0.804	-0.315	0.501744	0.817808
Clasp2	NM_001114347	0.805	-0.314	0.0613392	0.291228
Rhot1	NM_001163355	0.805	-0.313	0.0639674	0.297613
Slc25a51	NM_001009949	0.805	-0.312	0.0780522	0.338003
Tacc2	NM_001004468	0.805	-0.312	0.0850517	0.354597
Rnpepl1	NM_181405	0.805	-0.313	0.109098	0.405774
Podxl	NM_013723	0.805	-0.312	0.110142	0.407656
Taf1a	NM_021466	0.805	-0.312	0.169041	0.513573
Cd274	NM_021893	0.805	-0.314	0.24226	0.612492
Xxylt1	NM_198626	0.805	-0.314	0.27332	0.645712
Xrcc2	NM_020570	0.805	-0.312	0.367637	0.727039
1600002H07Rik	NM_028056	0.805	-0.312	0.505932	0.819532
1500015A07Rik	NR_029432	0.805	-0.312	0.510958	0.822346
Mns1	NM_008613	0.805	-0.313	0.577982	0.857065
Clk1	NM_001042634	0.806	-0.312	0.0702149	0.315898
Aig1	NM_025446	0.806	-0.311	0.073716	0.325638
Tmtc3	NM_001110013	0.806	-0.312	0.133569	0.452701
Ablim2	NM_001177696	0.806	-0.312	0.141644	0.469327
2610044O15Rik8	NM_153780	0.806	-0.311	0.157135	0.495128
Rassf4	NM_178045	0.806	-0.311	0.214729	0.579258
Sptssa	NM_134054	0.806	-0.312	0.237172	0.605828
Ccdc61	NM_001033314	0.806	-0.312	0.370907	0.729837
Prr3	NM_001282013	0.806	-0.311	0.390188	0.744857
Slc25a1	NM_153150	0.806	-0.31	0.487234	0.810078
Mcm5	NM_008566	0.806	-0.311	0.492198	0.812704
Ppil6	NM_028430	0.806	-0.311	0.609819	0.873138
Chrm2	NM_203491	0.807	-0.309	0.064918	0.300281
Plekhg1	NM_001159942	0.807	-0.309	0.0969035	0.381078
Ube3a	NM_011668	0.807	-0.309	0.101902	0.390949
Mrpl11	NM_025553	0.807	-0.309	0.174294	0.522195
Cep70	NM_023873	0.807	-0.31	0.180302	0.53011
Ttc9	NM_001033149	0.807	-0.309	0.655161	0.891283
Mllt4	NM_010806	0.808	-0.307	0.0687545	0.311788
Zfp715	NM_027264	0.808	-0.307	0.116798	0.422744
Nrp2	NM_001077403	0.808	-0.307	0.117144	0.423244
Usp3	NM_144937	0.808	-0.307	0.139671	0.464913
Adcy4	NM_080435	0.808	-0.307	0.18932	0.542514
Zbtb16	NM_001033324	0.808	-0.308	0.219728	0.584291
Zdhhc1	NM_175160	0.808	-0.308	0.230313	0.599155
Top2a	NM_011623	0.808	-0.308	0.276642	0.648046
Dennd3	NM_001081066	0.808	-0.308	0.284852	0.656301
Hhex	NM_008245	0.808	-0.308	0.323456	0.695193
Sat2	NM_026991	0.808	-0.308	0.49923	0.816106
Fbxl5	NM_001159963	0.809	-0.305	0.0797676	0.341346
Gfm2	NM_001146043	0.809	-0.306	0.0812667	0.345358
Ebf1	NM_001290711	0.809	-0.306	0.0818778	0.346983
Prkaa2	NM_178143	0.809	-0.306	0.0824857	0.349017
Bnip3l	NM_009761	0.809	-0.305	0.0870588	0.359387
Me3	NM_181407	0.809	-0.306	0.10396	0.39517
Fars2	NM_024274	0.809	-0.306	0.114091	0.416493
Tbx3	NM_198052	0.809	-0.307	0.114431	0.416862
Topbp1	NM_176979	0.809	-0.306	0.120467	0.42923
Arhgap31	NM_020260	0.809	-0.306	0.12575	0.439268
Nod1	NM_001171007	0.809	-0.306	0.13985	0.465257
C330018D20Rik	NM_029909	0.809	-0.306	0.184704	0.537016
Lsm8	NM_133939	0.809	-0.306	0.248965	0.620646
Celsr3	NM_080437	0.809	-0.306	0.294917	0.667271
H2-Eb1	NM_010382	0.809	-0.305	0.390831	0.745078
Glt28d2	NM_177130	0.809	-0.306	0.470875	0.79983
Drd2	NM_010077	0.809	-0.306	0.486069	0.809367
Penk	NM_001002927	0.809	-0.306	0.49195	0.812525
Ampd3	NM_001276301	0.81	-0.303	0.0623256	0.29336
Fat4	NM_183221	0.81	-0.304	0.0780304	0.338003
Abcd3	NM_008991	0.81	-0.304	0.0814146	0.345619
Zc3h14	NM_029334	0.81	-0.304	0.0877954	0.360857
Ccdc191	NM_027801	0.81	-0.304	0.109771	0.406856
Leng1	NM_027203	0.81	-0.303	0.120933	0.429881
Synj2bp	NM_025292	0.81	-0.304	0.142078	0.470155
Ano8	NM_001164679	0.81	-0.304	0.215335	0.58032
Plp1	NM_011123	0.81	-0.304	0.320628	0.692167
Klhl42	NM_001081237	0.81	-0.304	0.327497	0.698709
Ovca2	NM_027136	0.81	-0.304	0.396341	0.750042
Krtcap3	NM_027221	0.81	-0.304	0.52331	0.831555
S1pr5	NM_053190	0.81	-0.304	0.529519	0.833908
Chmp2b	NM_026879	0.811	-0.302	0.0738145	0.325683
Myo6	NM_001039546	0.811	-0.301	0.0795941	0.340904
Tlk2	NM_001294331	0.811	-0.303	0.0908411	0.367526
Tsg101	NM_021884	0.811	-0.303	0.103872	0.395142
Phkb	NM_199446	0.811	-0.302	0.103942	0.39517
Commd1	NM_144514	0.811	-0.303	0.107268	0.402287
Ucp3	NM_009464	0.811	-0.303	0.108349	0.40433
Eif2d	NM_001136070	0.811	-0.302	0.112224	0.413232
Fastkd1	NM_177244	0.811	-0.301	0.114058	0.416493
Trafd1	NM_001163470	0.811	-0.303	0.115144	0.418899
Rwdd1	NM_025614	0.811	-0.302	0.154566	0.490196
Fam131a	NM_133778	0.811	-0.302	0.212714	0.575644
Nxn	NM_008750	0.811	-0.302	0.26144	0.633638
Cryz	NM_009968	0.811	-0.302	0.477109	0.804307
6430573F11Rik	NM_176952	0.811	-0.303	0.511977	0.822346
Magt1	NM_025952	0.812	-0.3	0.0818468	0.346959
Mtch2	NM_019758	0.812	-0.3	0.0894874	0.364628
Tmcc3	NM_172051	0.812	-0.3	0.094301	0.375061
Krt222	NM_172946	0.812	-0.301	0.134116	0.453525
Stoml2	NM_023231	0.812	-0.3	0.146759	0.478668
Plekhm3	NM_001039493	0.812	-0.301	0.311185	0.68417
Slfn2	NM_011408	0.812	-0.3	0.315327	0.687128
Chek2	NM_016681	0.812	-0.3	0.342342	0.71061
Hlx	NM_008250	0.812	-0.3	0.34477	0.712725
Nle1	NM_145431	0.812	-0.301	0.455665	0.792408
Abcg1	NM_009593	0.812	-0.301	0.464739	0.797562
Fbxw9	NM_026791	0.812	-0.3	0.504418	0.819265
Oxa1l	NM_026936	0.813	-0.299	0.0864885	0.358073
Syne1	NM_001079686	0.813	-0.298	0.0897935	0.365112
Ano10	NM_001271873	0.813	-0.299	0.104544	0.396395
Smc3	NM_007790	0.813	-0.299	0.163041	0.504537
4930581F22Rik	NR_029475	0.813	-0.299	0.390127	0.744857
Csmd1	NM_053171	0.813	-0.298	0.685136	0.90411
Ssh2	NM_177710	0.814	-0.297	0.0768175	0.335264
Mtfp1	NM_026443	0.814	-0.296	0.0787825	0.339393
Ralgapa1	NM_001286263	0.814	-0.297	0.0880864	0.361135
Mccc1	NM_023644	0.814	-0.297	0.0906637	0.367119
Fzd4	NM_008055	0.814	-0.297	0.0940266	0.374515
Rdh14	NM_023697	0.814	-0.297	0.110596	0.409004
Pan3	NM_028291	0.814	-0.297	0.116092	0.421004
Angpt1	NM_001286062	0.814	-0.296	0.126532	0.440183
Mxd4	NM_010753	0.814	-0.296	0.138613	0.462689
Mtmr1	NM_001313702	0.814	-0.297	0.149511	0.482578
Dnlz	NM_001139504	0.814	-0.296	0.203461	0.562905
Itga8	NM_001001309	0.814	-0.297	0.253987	0.627017
Nlrx1	NM_001163743	0.814	-0.296	0.417848	0.765061
Ssrp1	NM_182990	0.815	-0.295	0.0728232	0.322966
Fth1	NR_073181	0.815	-0.295	0.0825522	0.34919
Rmnd5a	NM_024288	0.815	-0.294	0.0831006	0.350208
Tufm	NM_172745	0.815	-0.295	0.0876193	0.360351
Scaf8	NM_134123	0.815	-0.295	0.0995787	0.38692
Pno1	NM_025443	0.815	-0.296	0.11682	0.422744
Meox2	NM_008584	0.815	-0.295	0.130721	0.448328
Ptprb	NM_029928	0.815	-0.296	0.147344	0.479156
Tmem204	NM_001001183	0.815	-0.294	0.155502	0.491685
9430016H08Rik	NM_001081181	0.815	-0.295	0.159809	0.498093
Xpnpep3	NM_177310	0.815	-0.296	0.203938	0.5634
Abcd1	NM_007435	0.815	-0.295	0.207496	0.568055
Ncald	NM_001170866	0.815	-0.296	0.350214	0.717047
Mylk3	NM_001297612	0.816	-0.293	0.0801441	0.342164
C1qbp	NM_007573	0.816	-0.294	0.0827075	0.349414
Sec14l1	NM_001166507	0.816	-0.293	0.129818	0.44624
Ppp1r16b	NM_001159662	0.816	-0.294	0.149923	0.483223
Adprhl2	NM_133883	0.816	-0.293	0.425293	0.770255
Casp1	NM_009807	0.816	-0.293	0.532506	0.834958
Cacna1c	NM_001256002	0.817	-0.292	0.0835293	0.351269
Heca	NM_001033432	0.817	-0.291	0.0848805	0.354318
Golph3	NM_025673	0.817	-0.292	0.0919579	0.369945
Lace1	NM_145743	0.817	-0.291	0.0993392	0.386429
Fam171a1	NM_001081161	0.817	-0.292	0.100167	0.387661
Ppm1f	NM_176833	0.817	-0.291	0.104753	0.396408
Flcn	NR_073164	0.817	-0.292	0.129164	0.444967
Nudt21	NM_026623	0.817	-0.291	0.301435	0.675187
Spef1	NM_027641	0.817	-0.291	0.324278	0.695618
Zfp101	NM_009542	0.817	-0.291	0.327337	0.698709
Dnase1l1	NM_001172154	0.817	-0.291	0.378176	0.737233
Coa4	NM_183270	0.817	-0.292	0.379911	0.737638
Rab17	NM_001159725	0.817	-0.291	0.628525	0.881235
Mrpl37	NM_025500	0.818	-0.289	0.0839598	0.351981
Dmxl1	NM_001081371	0.818	-0.29	0.0909968	0.367922
Mrpl9	NM_030116	0.818	-0.29	0.0939937	0.374515
Aplnr	NM_011784	0.818	-0.289	0.108984	0.405458
Adgre5	NM_011925	0.818	-0.289	0.177884	0.527186
Lysmd3	NM_030257	0.818	-0.289	0.200841	0.560286
Mlh3	NM_175337	0.818	-0.29	0.200964	0.560464
Lrrc27	NM_027164	0.818	-0.291	0.211423	0.574543
Wdr92	NM_178909	0.818	-0.29	0.279377	0.651324
Wdr33	NM_028866	0.819	-0.288	0.0900117	0.365564
Gtf2a2	NR_104093	0.819	-0.288	0.105725	0.398547
Nfs1	NM_010911	0.819	-0.288	0.106504	0.40049
4931406P16Rik	NM_172741	0.819	-0.288	0.121742	0.431742
Lims2	NM_144862	0.819	-0.288	0.137807	0.460932
Pole3	NM_021498	0.819	-0.288	0.146932	0.478668
Znrd1as	NM_029602	0.819	-0.289	0.149361	0.482208
Nsmce4a	NM_001162855	0.819	-0.288	0.172216	0.518243
Ankzf1	NR_051998	0.819	-0.288	0.194165	0.549751
Yars2	NM_198246	0.819	-0.287	0.222693	0.58853
Rnaseh2a	NM_027187	0.819	-0.288	0.254163	0.627017
Zbed3	NM_028106	0.819	-0.288	0.29672	0.669361
Usp49	NM_198421	0.819	-0.288	0.395854	0.74964
Sec22c	NM_178677	0.819	-0.288	0.453886	0.79173
Chrna2	NM_144803	0.819	-0.287	0.613877	0.874678
Ddb2	NM_028119	0.819	-0.288	0.64543	0.88936
Mkln1	NM_013791	0.82	-0.287	0.0912159	0.367971
Med14	NM_001048208	0.82	-0.287	0.0934993	0.373429
Ppp6c	NM_024209	0.82	-0.287	0.0941333	0.374831
Cisd1	NM_134007	0.82	-0.286	0.117941	0.424603
Lmbr1	NM_020295	0.82	-0.286	0.168674	0.513012
Lrrc8c	NM_133897	0.82	-0.287	0.187112	0.539901
9030624J02Rik	NM_027815	0.82	-0.286	0.188459	0.541443
Tchp	NM_029992	0.82	-0.286	0.200538	0.559555
Kdm2b	NM_001003953	0.82	-0.287	0.202306	0.562007
D3Ertd254e	NM_001101478	0.82	-0.287	0.217636	0.582087
Sil1	NM_030749	0.82	-0.286	0.217966	0.582087
Cep192	NM_027556	0.82	-0.287	0.253302	0.62613
AA465934	NR_028363	0.82	-0.286	0.278373	0.650093
4921531C22Rik	NR_033782	0.82	-0.285	0.315173	0.687128
Zfp874a	NM_177712	0.82	-0.286	0.406043	0.756612
Sbf2	NM_177324	0.821	-0.285	0.0790034	0.339723
Mrpl30	NM_027098	0.821	-0.285	0.0853455	0.355064
Dlst	NM_030225	0.821	-0.285	0.113929	0.416384
Myct1	NM_026793	0.821	-0.285	0.162367	0.503415
Deb1	NM_026794	0.821	-0.284	0.173854	0.521449
Pigu	NM_001004721	0.821	-0.284	0.196581	0.55315
Sez6l2	NM_001252567	0.821	-0.284	0.320299	0.691786
Ralgps1	NM_175211	0.821	-0.284	0.324476	0.695618
Tmem128	NM_025480	0.821	-0.284	0.47726	0.804369
Cnbd2	NM_027585	0.821	-0.285	0.581607	0.859035
Ndufc1	NM_025523	0.822	-0.283	0.0846243	0.354006
Tollip	NM_023764	0.822	-0.282	0.09525	0.378064
Syde2	NM_001166064	0.822	-0.283	0.103895	0.395142
Wdtc1	NM_199306	0.822	-0.283	0.1044	0.396323
Rpl27	NM_011289	0.822	-0.282	0.273609	0.645837
Cyb5rl	NM_175471	0.822	-0.283	0.31402	0.686466
Kctd13	NM_172747	0.822	-0.282	0.44168	0.784531
Ccdc62	NM_001134767	0.822	-0.283	0.459684	0.794156
2810403D21Rik	NR_015493	0.822	-0.282	0.55388	0.845217
Slc2a8	NM_019488	0.822	-0.283	0.606097	0.871014
Fkbp9	NM_012056	0.823	-0.281	0.0850547	0.354597
Efr3a	NM_133766	0.823	-0.282	0.0870745	0.359387
Jmjd1c	NM_207221	0.823	-0.281	0.0872565	0.359725
Glg1	NM_009149	0.823	-0.281	0.0899128	0.365379
Usp15	NM_027604	0.823	-0.282	0.107059	0.401803
Tns1	NM_027884	0.823	-0.28	0.109231	0.406007
Dgke	NM_019505	0.823	-0.28	0.117106	0.42322
Pecam1	NM_001305157	0.823	-0.281	0.145737	0.47728
Mapk1ip1	NM_001045483	0.823	-0.28	0.15215	0.48676
1700021F05Rik	NM_026411	0.823	-0.28	0.170278	0.514909
Glt8d1	NM_001165930	0.823	-0.282	0.185296	0.537804
Abhd5	NM_026179	0.823	-0.281	0.187453	0.540087
Lbr	NM_133815	0.823	-0.281	0.191149	0.545511
Mtmr14	NM_026849	0.823	-0.281	0.211065	0.573912
Ctbs	NM_001293672	0.823	-0.281	0.373035	0.732335
Sgf29	NM_029339	0.823	-0.28	0.386148	0.74275
AU021092	NM_001033220	0.823	-0.282	0.529606	0.833908
Tprn	NM_175286	0.823	-0.281	0.549178	0.843866
BC065397	NR_033324	0.823	-0.281	0.582595	0.85934
Magoh	NM_001282737	0.824	-0.28	0.111295	0.411144
Cep250	NM_008383	0.824	-0.28	0.117551	0.423906
Bach1	NM_007520	0.824	-0.279	0.120011	0.428497
Lrrk2	NM_025730	0.824	-0.278	0.122473	0.433007
Ddx58	NM_172689	0.824	-0.279	0.136888	0.459096
Txndc15	NM_175150	0.824	-0.279	0.178819	0.528559
Phf11d	NM_199015	0.824	-0.279	0.22156	0.587013
Crebl2	NM_177687	0.824	-0.278	0.223423	0.589547
Errfi1	NM_133753	0.824	-0.279	0.284845	0.656301
Alox5	NM_009662	0.824	-0.279	0.395519	0.749354
Ybey	NM_172550	0.824	-0.28	0.403836	0.75561
Mansc1	NM_026345	0.824	-0.279	0.488209	0.8106
Pdpr	NM_198308	0.825	-0.277	0.101642	0.390769
Dcun1d5	NM_029775	0.825	-0.278	0.104506	0.396395
Zfp281	NM_177643	0.825	-0.278	0.11573	0.419915
Ndufaf4	NM_026742	0.825	-0.277	0.12055	0.429365
Csdc2	NM_145473	0.825	-0.277	0.122815	0.43352
Pik3c2a	NM_011083	0.825	-0.278	0.139936	0.46543
Morf4l1	NM_001039147	0.825	-0.277	0.160966	0.50044
Gucy1a3	NM_021896	0.825	-0.278	0.173924	0.521542
Rasip1	NM_028544	0.825	-0.277	0.177154	0.526391
Usp37	NM_176972	0.825	-0.277	0.212194	0.575101
Crls1	NM_025646	0.825	-0.277	0.226821	0.594376
D6Wsu163e	NM_138594	0.825	-0.278	0.26553	0.638301
S1pr3	NM_010101	0.825	-0.278	0.286507	0.657943
Repin1	NM_001079904	0.825	-0.277	0.332622	0.701328
Uggt2	NM_001081252	0.825	-0.278	0.365457	0.725909
Srgap1	NM_001242411	0.825	-0.277	0.409829	0.759261
Zfp825	NM_146231	0.825	-0.277	0.46869	0.799217
Hpcal1	NM_016677	0.825	-0.278	0.511998	0.822346
Psma1	NM_011965	0.826	-0.275	0.111726	0.412289
Rasal2	NM_177644	0.826	-0.276	0.116866	0.422797
1810022K09Rik	NM_001099674	0.826	-0.275	0.224615	0.591207
Timm50	NM_025616	0.826	-0.275	0.259216	0.631302
Manea	NM_172865	0.826	-0.276	0.263371	0.635947
6330416G13Rik	NM_144905	0.826	-0.276	0.314165	0.686466
BC068281	NM_001170858	0.826	-0.275	0.366872	0.726865
Tamm41	NM_026894	0.826	-0.276	0.419204	0.76622
Pcdhga5	NM_033588	0.826	-0.275	0.425818	0.770673
Cmtr2	NM_146215	0.826	-0.276	0.540192	0.839724
Med1	NM_134027	0.827	-0.273	0.0968937	0.381078
Rapgef2	NM_001099624	0.827	-0.273	0.108355	0.40433
Zfp386	NM_001004066	0.827	-0.274	0.129165	0.444967
Prosc	NM_054057	0.827	-0.273	0.141641	0.469327
Per2	NM_011066	0.827	-0.274	0.15193	0.486535
Gstm1	NM_010358	0.827	-0.275	0.158418	0.496533
Ccdc117	NM_134033	0.827	-0.274	0.16106	0.500564
Poli	NM_001289515	0.827	-0.273	0.38444	0.741607
Gm16861	NR_037666	0.827	-0.275	0.471065	0.799936
Trappc6a	NM_025960	0.827	-0.274	0.613783	0.874678
Ndufb11	NM_019435	0.828	-0.272	0.0982932	0.383892
Aktip	NM_001302267	0.828	-0.273	0.106939	0.401685
Ttc19	NM_028360	0.828	-0.272	0.114249	0.4166
Mrps31	NM_020560	0.828	-0.271	0.119505	0.427476
Yes1	NM_001205133	0.828	-0.272	0.126473	0.440174
Klhl13	NM_026167	0.828	-0.272	0.275629	0.646784
Mpped2	NM_001143683	0.828	-0.273	0.288638	0.660505
Fxn	NM_008044	0.828	-0.272	0.315487	0.687128
Enpp2	NM_001285995	0.828	-0.272	0.370882	0.729837
Eid2b	NM_001177427	0.828	-0.273	0.37236	0.731702
Psph	NM_133900	0.828	-0.272	0.372723	0.732038
Coq4	NM_178693	0.828	-0.273	0.394345	0.748132
Mpdu1	NM_011900	0.828	-0.272	0.540967	0.840112
Amph	NM_001289546	0.828	-0.273	0.590846	0.86393
Pcnt	NM_001282992	0.829	-0.27	0.102196	0.390978
Atrn	NM_009730	0.829	-0.271	0.108306	0.40433
Suclg2	NM_011507	0.829	-0.271	0.120658	0.429573
Brf1	NM_028193	0.829	-0.271	0.129358	0.44513
Canx	NM_007597	0.829	-0.27	0.136025	0.456761
Naa38	NM_030083	0.829	-0.27	0.137438	0.460262
Il15ra	NM_008358	0.829	-0.27	0.171495	0.517213
Psmd5	NM_080554	0.829	-0.271	0.260149	0.632193
Mob3c	NM_175308	0.829	-0.271	0.338016	0.707547
Slc36a4	NM_172289	0.829	-0.27	0.344366	0.712644
Zfp560	NM_001004190	0.829	-0.271	0.508784	0.821095
Zfp647	NM_001168276	0.829	-0.271	0.732636	0.921203
Pmpca	NM_173180	0.83	-0.269	0.123424	0.434746
Sco1	NM_001040026	0.83	-0.268	0.140066	0.465522
Exoc6	NM_175353	0.83	-0.268	0.158995	0.497365
Fam214a	NM_001113283	0.83	-0.268	0.163262	0.504764
Shank3	NM_021423	0.83	-0.269	0.207093	0.567577
Lrif1	NM_001286685	0.83	-0.268	0.223546	0.589758
Aldh9a1	NM_019993	0.83	-0.268	0.297164	0.670128
1810034E14Rik	NR_045798	0.83	-0.268	0.329911	0.699979
Fancl	NM_025923	0.83	-0.269	0.368422	0.72799
Gnpnat1	NM_019425	0.83	-0.269	0.40623	0.756612
Hic1	NM_001098203	0.83	-0.268	0.469055	0.799217
Ikzf5	NM_175115	0.83	-0.268	0.514448	0.824142
Zkscan4	NM_001039115	0.83	-0.268	0.640302	0.886152
Hs6st2	NM_001077202	0.83	-0.269	0.645226	0.88936
Sfrp5	NM_018780	0.83	-0.268	0.65331	0.890735
Scube3	NM_001004366	0.83	-0.269	0.665899	0.895131
Tmem109	NM_134142	0.831	-0.267	0.126433	0.440144
Memo1	NM_133771	0.831	-0.268	0.129247	0.444967
Med24	NM_011869	0.831	-0.268	0.15278	0.487823
Mrpl24	NM_026591	0.831	-0.266	0.171864	0.517541
Eif3f	NM_025344	0.831	-0.266	0.190355	0.54376
Pdcd6	NM_011051	0.831	-0.268	0.204505	0.564503
Rai2	NM_001103367	0.831	-0.268	0.205073	0.565275
Hsf1	NM_008296	0.831	-0.267	0.234775	0.60337
Psmg1	NM_019537	0.831	-0.267	0.2781	0.649855
Cxcl12	NM_001012477	0.832	-0.266	0.109936	0.407005
Rab14	NM_026697	0.832	-0.265	0.114337	0.416742
Lsm14b	NM_177727	0.832	-0.265	0.122161	0.432892
Cops6	NM_012002	0.832	-0.266	0.126234	0.439888
Zmym5	NM_001253752	0.832	-0.266	0.129495	0.445353
Zfx	NM_001044386	0.832	-0.265	0.137944	0.461279
Fam101b	NM_029658	0.832	-0.266	0.14554	0.47697
Rb1cc1	NM_009826	0.832	-0.266	0.155913	0.492414
Tmx1	NM_028339	0.832	-0.266	0.15887	0.497264
Atp6v1g1	NM_024173	0.832	-0.266	0.165552	0.508274
Mrpl35	NM_025430	0.832	-0.265	0.165877	0.508929
Usp40	NM_001198573	0.832	-0.265	0.171869	0.517541
Ly6e	NM_001164039	0.832	-0.265	0.222475	0.588069
St6galnac2	NM_009180	0.832	-0.265	0.246688	0.616962
Lyrm7	NM_029327	0.832	-0.265	0.339923	0.70887
Irf1	NM_001159393	0.832	-0.265	0.356234	0.721603
Pold2	NM_008894	0.832	-0.265	0.358693	0.722767
Cdkn2aipnl	NM_029976	0.832	-0.265	0.452023	0.790711
Ate1	NM_001136054	0.833	-0.264	0.104742	0.396408
Ptprg	NM_008981	0.833	-0.263	0.111805	0.412359
Rnf13	NM_001113413	0.833	-0.263	0.123084	0.434036
Dlg1	NM_001252435	0.833	-0.263	0.123915	0.435713
Map3k4	NM_011948	0.833	-0.263	0.126282	0.439888
Ncor1	NM_011308	0.833	-0.264	0.126739	0.440392
Sash1	NM_175155	0.833	-0.263	0.155106	0.491062
Mrpl38	NM_024177	0.833	-0.264	0.179256	0.528954
Zfp809	NM_172763	0.833	-0.264	0.186062	0.538583
Ttc33	NM_026213	0.833	-0.263	0.201958	0.561795
4930523C07Rik	NR_028111	0.833	-0.263	0.21778	0.582087
Rint1	NM_177323	0.833	-0.264	0.265316	0.638246
Dock10	NM_175291	0.833	-0.264	0.337751	0.707209
Dnaaf3	NM_001033548	0.833	-0.264	0.402765	0.754698
1700066M21Rik	NM_028546	0.833	-0.264	0.517529	0.826521
Zfp442	NM_001310645	0.833	-0.264	0.52176	0.830066
Cpxm1	NM_019696	0.833	-0.263	0.724159	0.918857
Adsl	NM_009634	0.834	-0.262	0.119206	0.42732
Ndufa9	NM_025358	0.834	-0.262	0.123961	0.435763
Abcc9	NM_021041	0.834	-0.262	0.131634	0.449168
Dennd1b	NM_001166501	0.834	-0.262	0.143099	0.472383
Snx13	NM_001014973	0.834	-0.262	0.144456	0.475138
Itsn2	NM_001198968	0.834	-0.262	0.146924	0.478668
Tmem135	NM_028343	0.834	-0.262	0.177262	0.526423
Trappc6b	NM_001306218	0.834	-0.261	0.204288	0.564081
Rfwd3	NM_146218	0.834	-0.261	0.206405	0.566488
Glce	NM_033320	0.834	-0.261	0.210675	0.573423
5031439G07Rik	NM_001033273	0.834	-0.262	0.21449	0.578729
Ing5	NM_025454	0.834	-0.262	0.232199	0.601526
D3Ertd751e	NM_028667	0.834	-0.262	0.310336	0.68313
Tmed1	NM_010744	0.834	-0.262	0.313222	0.68607
Cntrob	NM_172560	0.834	-0.262	0.491979	0.812525
Gtpbp6	NM_145147	0.834	-0.262	0.53315	0.835054
Rinl	NM_177158	0.834	-0.262	0.566796	0.851253
Usp24	NM_183225	0.835	-0.259	0.134106	0.453525
Elmsan1	NM_001163502	0.835	-0.26	0.144883	0.47597
Rap1gap2	NM_001015046	0.835	-0.261	0.146362	0.478053
Cep162	NM_199316	0.835	-0.26	0.15352	0.488836
Klhl7	NM_026448	0.835	-0.26	0.153898	0.489367
Hecw2	NM_001001883	0.835	-0.259	0.178512	0.528336
Chpt1	NR_027477	0.835	-0.26	0.191464	0.546067
Orc4	NM_011958	0.835	-0.26	0.213799	0.577875
Supt3	NM_178652	0.835	-0.26	0.225765	0.592977
Zfp398	NM_027477	0.835	-0.26	0.252673	0.62561
Arpc1b	NM_023142	0.835	-0.259	0.264858	0.637585
Cbfa2t3	NM_009824	0.835	-0.259	0.271711	0.644344
Egf	NM_010113	0.835	-0.261	0.302929	0.676978
Pgap2	NM_145583	0.835	-0.26	0.331498	0.700716
Ttc5	NM_001080949	0.835	-0.26	0.334099	0.702798
Kcnn1	NM_032397	0.835	-0.26	0.367415	0.727039
Ctla2b	NM_007797	0.835	-0.26	0.380636	0.738128
Rfc5	NM_028128	0.835	-0.259	0.552657	0.844912
Lss	NM_146006	0.835	-0.261	0.556861	0.846839
Pycard	NM_023258	0.835	-0.259	0.596991	0.867368
Ocrl	NM_177215	0.836	-0.258	0.162552	0.503594
Gmnn	NM_020567	0.836	-0.258	0.18322	0.534776
Zfp84	NM_023750	0.836	-0.258	0.186916	0.539638
Thbd	NM_009378	0.836	-0.258	0.2638	0.636223
Ssbp2	NM_024272	0.836	-0.259	0.286624	0.657993
Wsb1	NM_019653	0.836	-0.259	0.315513	0.687128
Unc50	NM_026123	0.836	-0.259	0.341852	0.710317
Amn1	NM_001113424	0.836	-0.258	0.365433	0.725909
Gas2l1	NM_030228	0.836	-0.258	0.370695	0.729826
Prkra	NM_011871	0.836	-0.258	0.429474	0.774214
Acyp1	NM_025421	0.836	-0.259	0.438752	0.782156
Zmynd15	NM_001029929	0.836	-0.259	0.549187	0.843866
A230072C01Rik	NR_027445	0.836	-0.259	0.61322	0.874634
Plaa	NM_172695	0.837	-0.257	0.122525	0.433007
Foxn3	NM_183186	0.837	-0.257	0.133217	0.452229
Fam63b	NM_172772	0.837	-0.257	0.145009	0.476197
Zfp280d	NM_146224	0.837	-0.257	0.147833	0.480136
Pik3c2b	NM_001099276	0.837	-0.257	0.151984	0.486535
Cul5	NM_027807	0.837	-0.256	0.1638	0.50524
Ttll5	NM_001081423	0.837	-0.257	0.172418	0.518623
Terf2ip	NM_020584	0.837	-0.256	0.213835	0.577875
Esco1	NM_001081222	0.837	-0.256	0.263326	0.635947
Dus1l	NM_026824	0.837	-0.257	0.273312	0.645712
Hacl1	NM_019975	0.837	-0.257	0.38986	0.744857
Tpst1	NM_013837	0.837	-0.256	0.389991	0.744857
Slc25a27	NM_028711	0.837	-0.256	0.395399	0.749354
Ifit3b	NM_001005858	0.837	-0.256	0.449734	0.789329
Lrrc28	NR_028143	0.837	-0.257	0.460794	0.794773
Lrrc55	NM_001033346	0.837	-0.257	0.590812	0.86393
Rbbp4	NM_009030	0.838	-0.255	0.121247	0.430354
Erap1	NM_030711	0.838	-0.255	0.13577	0.456133
Slc39a14	NM_144808	0.838	-0.254	0.152085	0.486744
Sned1	NM_172463	0.838	-0.255	0.162589	0.503594
Cyyr1	NM_144853	0.838	-0.255	0.167939	0.51212
Wdr5	NM_080848	0.838	-0.255	0.198328	0.556003
1700040L02Rik	NM_028491	0.838	-0.256	0.209282	0.570655
Tmed2	NM_019770	0.838	-0.255	0.217766	0.582087
Tigd2	NM_001081145	0.838	-0.254	0.251788	0.624212
Fbxo7	NM_001310745	0.838	-0.256	0.306956	0.679413
Eri1	NM_026067	0.838	-0.255	0.314627	0.686487
Sh3tc2	NM_172628	0.838	-0.256	0.50164	0.817808
Tcea2	NM_009326	0.838	-0.255	0.52988	0.834014
Mef2c	NM_025282	0.839	-0.254	0.128637	0.44408
Idh3g	NM_008323	0.839	-0.254	0.139611	0.464913
Tmem248	NM_001081394	0.839	-0.253	0.164846	0.507476
Zfp654	NM_028059	0.839	-0.254	0.166912	0.510514
Cox15	NM_144874	0.839	-0.253	0.172771	0.519112
She	NM_172530	0.839	-0.253	0.174736	0.522944
Cct4	NM_009837	0.839	-0.253	0.180807	0.530984
Sgcb	NM_011890	0.839	-0.253	0.188311	0.541443
Mmaa	NM_133823	0.839	-0.254	0.240071	0.609329
Cacybp	NM_009786	0.839	-0.253	0.242192	0.612492
Slc31a2	NM_025286	0.839	-0.254	0.245273	0.615592
Zfand1	NM_025512	0.839	-0.254	0.298011	0.670839
Zbtb26	NM_199025	0.839	-0.253	0.359032	0.722974
Klhl28	NM_025707	0.839	-0.253	0.454428	0.792045
Zfp955b	NM_001142957	0.839	-0.254	0.485048	0.808966
Naprt	NM_172607	0.839	-0.252	0.492758	0.813266
Mycn	NM_008709	0.839	-0.254	0.524597	0.832
Lca5l	NM_001001492	0.839	-0.252	0.637227	0.884143
Zfp292	NM_013889	0.84	-0.251	0.140995	0.467587
Zfp148	NM_011749	0.84	-0.252	0.144239	0.474538
Arfrp1	NM_001165991	0.84	-0.252	0.14667	0.478668
Rnpc3	NM_001038696	0.84	-0.251	0.15052	0.484002
Nfkb1	NM_008689	0.84	-0.252	0.152887	0.488052
Tarsl2	NM_172310	0.84	-0.251	0.164821	0.507476
Rhot2	NM_145999	0.84	-0.252	0.192066	0.546709
Man2a1	NM_008549	0.84	-0.252	0.199094	0.557475
Cfap20	NM_008187	0.84	-0.251	0.227095	0.594625
Unc93b1	NM_019449	0.84	-0.251	0.291193	0.663257
Wdr18	NM_175450	0.84	-0.252	0.341993	0.710317
Pyroxd1	NM_183165	0.84	-0.252	0.419942	0.766646
Fam84b	NM_001162926	0.84	-0.252	0.48002	0.805541
Abi3	NM_001163464	0.84	-0.251	0.517281	0.826436
Zfp607	NM_001024726	0.84	-0.252	0.524623	0.832
Tmem255b	NM_001143671	0.84	-0.251	0.552469	0.844912
Gm14057	NR_024097	0.84	-0.251	0.569156	0.851928
Hbs1l	NM_019702	0.841	-0.25	0.146155	0.477757
Ubxn7	NM_177633	0.841	-0.251	0.150555	0.484002
Ccny	NM_026484	0.841	-0.25	0.151448	0.485617
Spag7	NM_172561	0.841	-0.25	0.151836	0.486402
Tiprl	NM_145513	0.841	-0.25	0.154733	0.490502
Acot7	NM_133348	0.841	-0.251	0.163824	0.50524
H2afv	NM_029938	0.841	-0.249	0.167826	0.511916
Apmap	NM_027977	0.841	-0.249	0.179898	0.530017
Gcc2	NM_027375	0.841	-0.25	0.194137	0.549751
Rpl26	NM_009080	0.841	-0.249	0.195965	0.551871
Chst15	NM_029935	0.841	-0.249	0.217585	0.582087
H6pd	NM_173371	0.841	-0.251	0.271301	0.644037
Bbs2	NM_026116	0.841	-0.249	0.306167	0.679286
Taf6	NM_009315	0.841	-0.25	0.313351	0.68607
Cdan1	NM_026891	0.841	-0.251	0.317233	0.688488
Ppdpf	NM_025598	0.841	-0.249	0.341893	0.710317
Siah1a	NM_009172	0.841	-0.249	0.352115	0.718399
Slc17a5	NM_001276452	0.841	-0.25	0.425125	0.770255
Dhfr	NM_010049	0.841	-0.25	0.53203	0.834958
2310069G16Rik	NR_040309	0.841	-0.251	0.565344	0.851012
BC030499	NM_001287206	0.841	-0.249	0.676825	0.900054
Ube2d1	NM_145420	0.842	-0.248	0.130769	0.44838
Uqcr11	NM_025650	0.842	-0.248	0.131579	0.449168
Zc3h7b	NM_001081016	0.842	-0.248	0.135507	0.455882
Ythdf3	NM_172677	0.842	-0.248	0.145447	0.476824
Acsl1	NM_007981	0.842	-0.249	0.146888	0.478668
Plcg1	NM_021280	0.842	-0.248	0.15818	0.496233
Esrra	NM_007953	0.842	-0.249	0.158955	0.497365
Atl3	NM_146091	0.842	-0.248	0.16639	0.510039
Tars2	NM_027931	0.842	-0.248	0.1786	0.528369
Trim72	NM_001079932	0.842	-0.247	0.179149	0.528954
Tmem144	NM_027495	0.842	-0.249	0.224365	0.590705
Tbc1d12	NM_145952	0.842	-0.248	0.229594	0.598311
Rev1	NM_019570	0.842	-0.248	0.258391	0.630921
Dgkh	NM_001081336	0.842	-0.249	0.281183	0.652728
Tmem246	NM_025944	0.842	-0.247	0.296421	0.669006
Tsga10	NM_207228	0.842	-0.248	0.35033	0.717047
Pml	NM_178087	0.842	-0.249	0.361078	0.724472
Zfp428	NM_001290461	0.842	-0.248	0.387198	0.743568
Htra2	NM_019752	0.842	-0.249	0.495707	0.814461
Gns	NM_029364	0.843	-0.247	0.13152	0.449168
Poldip2	NM_026389	0.843	-0.247	0.153171	0.488245
Uchl3	NM_016723	0.843	-0.247	0.217222	0.582087
Cables2	NM_145851	0.843	-0.246	0.28088	0.652728
[truncated: 18,308 more rows]

## Sheet: upregulated (UP) genes
##863 up-regulated genes
[truncated: 864 more rows]
