# Supplementary material for: EED orchestration of heart maturation through interaction with HDACs is H3K27me3-independent
Source: eLife. 2017 Apr 10;6:e24570. doi: 10.7554/eLife.24570 (PMC5400508; doi:10.7554/eLife.24570)
Supplement: Supplementary file 2. — (A) The sequence of the TriFECTa Dicer-Substrate siRNAs (DsiRNAs). (B) Antibodies information. (C) The list of PCR primers. DOI: http://dx.doi.org/10.7554/eLife.24570.017 [file elife-24570-supp2.xlsx]

## Sheet: Supplemetary File 2A
The sequence of the TriFECTa Dicer-Substrate siRNAs (DsiRNAs)
Target	Forward sequence (5' to 3')	Reverse sequence (5' to 3')
Eed	rCrGrArUrUrArUrGrGrArArUrArUrCrCrArArArCrArGrArCrA	rUrGrUrCrUrGrUrUrUrGrGrArArUrUrCrCrUrArArUrCrGrUrA
Eed	rArGrArUrCrCrUrCrArUrArArArGrCrCrArArArUrGrCrArCrA	rUrGrUrGrCrUrUrUrGrGrCrUrUrUrArUrGrArGrGrArUrCrUrUrC
Eed	rGrArGrArCrArUrArCrArUrArGrGrArArUrUrArUrGrUrUrGrA	rUrUrCrArArCrArUrArArUrUrCrCrUrArUrUrArUrGrUrUrCrUrG
Negative Control	rCrGrUrUrArArUrCrGrCrGrUrArUrArArUrArCrGrCrGrUAT	rArUrArCrGrCrGrUrArUrUrArUrArCrGrCrGrArUrUrArArCrGrArC
Fluorescent-laleled control	/5TYE563/T*CrCrUrUrCrCrUrCrUrCrUrUrUrCrUrUrCrCrUrUrGrUG*A	/5TYE563/T*CrArCrArArGrGrGrArArGrArArArArGrGrGrArArGG*A

## Sheet: Supplementary File 2B
Antibodies information
Antigen	Vendor	Cat. No	Dilution	Application
H3K27ac	Active Motif	39133		ChIP
H3K27ac	Abcam	ab4729		ChIP
H3K27me3	Millipore	17-622 & 07-449		ChIP
HDAC1	Abcam	ab7028		ChIP
HDAC2	Abcam	ab7029		ChIP
HDAC5	Active Motif	40970		ChIP
EED	Millipore	17-10034, 17-663		ChIP-qPCR
H3K27me3	Millipore	07-449	3.51389	Immunoblot
H3K27ac	Active Motif	39133	3.51389	Immunoblot
EED	Kind gift from D. Reinberg		1.08333	Immunoblot
GAPDH	Fitzgerald Industries	10R-G109a	1:20,000	Immunoblot
β tubulin	Sigma Aldrich	T0198	10000	Immunoblot
Flag	Sigma Aldrich	M480a	3.51389	Immunoblot
HDAC1	Abcam	ab7028	1:10,000	Immunoblot
HDAC2	Abcam	ab7029	1:10,000	Immunoblot
HDAC5	Active Motif	40970	3.51389	Immunoblot

## Sheet: Supplementary File 2C
Primers list
ChIP primers
Target genes	Forward primer sequence	Reverse primer sequence
Intergenic control	ATTTTGTGCTGCATAACCTCCT	TAGCAACATCCTAAGCTGGACA
Tbx15 + 300	GGCGGCTAAAATGAGTGAAC	CTTCAACGGAGAAGGCATGT
Tbx15 + 8000	AGTTTGGGTCCAGCTCTGTG	CTGCTCCCTTCTCCTGTCTG
Six1-tss	CTCTCGTTCTTGTGCAGGTG	TTTTACGCAAGAGCAAGTGG
Acta1-tss	TCCCAGGCAGACTCATCTTTAT	AGATTCCCATCTATCAGCGGTA
Cdkn2a-tss	GAAACAGCGCTAAAGGATCG	ACACGTGTGCACTTCTTTGC
VEGF-tss	TAGATCTGTGTGTCCCTCTCCC	GAGCAGGAAAGTGAGGTTACGT
Primers for qPCR.
Gene	Forward primer sequence	Reverse primer sequence
Gapdh	ACAACTTTGGCATTGTGG	GATGCAGGGATGATGTTC
Myh7	AAGGGCCTGAATGAGGAGTAGATC	TGCAAAGGCTCCAGGTCTGA
Nppa	GGCCATATTGGAGCAAATCCTGTG	CATGACCTCATCTTCTACCGGCAT
Tbx15	GTCACAGCCTATCAGAACCAG	AGGTCTCCAGAATGCATAAGTC
Acta1	GCCAGCCTCTGAAACTAGACA	CCACGATGGATGGGAACACA
Tnni1	ACCATCTTGTTTCTTTGTCCTTTC	GTTTACGGGAGGCAGTGATC
Tnnt1	TGTGCTCTACAACCGCATC	TTGAGTTACAGATGGGACACG
Slc9a3	TGTGTTGGATGCTGGATACTTC	AGGAAGACACCATAGAGGGACA
VEGF	AAGGAGGAGGGCAGAATCAT	GGGTACTCCTGGAAGATGTCC
Primers for sgRNA cloned into pMLM3636 plasmid
gRNA	Forward primer sequence	Reverse primer sequence
VEGF-v1	ACACCGTGTGCAGACGGCAGTCACTG	AAAACAGTGACTGCCGTCTGCACACG
VEGF-v2	ACACCGAGCAGCGTCTTCGAGAGTGG	AAAACCACTCTCGAAGACGCTGCTCG
VEGF-v3	ACACCGGTGAGTGAGTGTGTGCGTGG	AAAACCACGCACACACTCACTCACCG
VEGF-v4	ACACCGTTGGAGCGGGGAGAAGGCCG	AAAACGGCCTTCTCCCCGCTCCAACG
sgGFP	ACACCGAATAGCTCAGAGGCCGAGGG	AAAACCCTCGGCCTCTGAGCTATTCG
