# Supplementary material for: EED orchestration of heart maturation through interaction with HDACs is H3K27me3-independent
Source: eLife. 2017 Apr 10;6:e24570. doi: 10.7554/eLife.24570 (PMC5400508; doi:10.7554/eLife.24570)
Supplement: Supplementary file 3. — DOI: http://dx.doi.org/10.7554/eLife.24570.018 [file elife-24570-supp3.xlsx]

## Sheet: Supplementary File 3
Sample	Total_Reads	Uniquely mapped reads	Multiple mapped reads	Not mapped reads	Uniquely mapped rate (%)
H3K27me3_WT_rep1	27805427	22193896	4712444	899087	79.82
H3K27me3_WT_rep2	34383534	27541308	5935393	906833	80.1
H3K27me3_WT_rep3	37213463	29533198	6428390	1251875	79.36
H3K27me3_CKO_rep1	41407325	32657136	7672932	1077257	78.87
H3K27me3_CKO_rep2	12282757	9768991	2224105	289661	79.53
H3K27me3_CKO_EED_P14_rep1	27511099	21426906	4605325	1478868	77.88
H3K27me3_CKO_EED_P14_rep2	24749664	19925912	3711909	1111843	80.51
H3K27me3_CKO_EED_P25_rep1	27910789	21290773	4308339	2311677	76.28
H3K27me3_CKO_luc_P25_rep1	22541337	17240184	3629168	1671985	76.48
H3K27me3_Het_P25_rep1	36007946	27274451	5845590	2887905	75.75
H3K27me3_CKO_EED_P25_rep2	23741502	18367228	3680789	1693485	77.36
H3K27ac_WT_rep1	20935600	16651038	3643574	640988	79.53
H3K27ac_WT_rep2	23716566	19221600	3879164	615802	81.05
H3K27ac_CKO_rep1	20641319	16951175	3181148	508996	82.12
H3K27ac_CKO_rep2	17350767	13927303	2980825	442639	80.27
H3K27ac_CKO_EED_P14_rep1	30879796	28254749	1784916	840131	91.5
H3K27ac_CKO_EED_P14_rep2	26076816	24445574	1213872	417370	93.74
H3K27ac_CKO_EED_P25_rep1	29599020	26856759	1892836	849425	90.74
H3K27ac_CKO_EED_P25_rep2	26712274	24275777	1589168	847329	90.88
H3K27ac_CKO_luc_P25_rep1	37399991	34460749	2224038	715204	92.14
H3K27ac_Heto_P25_rep1	38335508	32158820	3049147	3127541	83.89
input_H3K27me3_WT_CKO	127765378	96700483	26140697	4924198	75.69
input_H3K27ac_WT_CKO	16595055	12393482	3660539	541034	74.68
input_H3K27me3_H3K27ac_P14	37704818	27724319	8812872	1167627	73.53
input_H3K27me3_H3K27ac_P25	40246714	29283004	9608531	1355179	72.76
HDAC2_CKO	61344860	41685268	16893606	2765986	67.95
HDAC2_het	70373786	50909432	16562790	2901564	72.34
input_HDAC2	61515346	36671390	21463968	3379988	59.61
H3K27me3_het_rep1	75053232	57976144	15066398	2010690	77.25
H3K27me3_het_rep2	88855882	68276532	17951216	2628134	76.84
H3K27me3_CKO_HDAC1/2_rep1	84936224	65392269	17098363	2445592	76.99
H3K27me3_CKO_luc_rep1	73938538	55209665	16426973	2301900	74.67
H3K27me3_CKO_HDAC1/2_rep2	93629142	70322220	20197912	3109010	75.11
H3K27me3_CKO_luc_rep2	86172774	65736288	17433534	3002952	76.28
H3K27ac_het_rep1	66598886	55067790	10498164	1032932	82.69
H3K27ac_het_rep2	104750324	85530957	16830993	2388374	81.65
H3K27ac_CKO_HDAC1/2_rep1	55206490	45356371	8813541	1036578	82.16
H3K27ac_CKO_luc_rep1	67656184	57592902	8889126	1174156	85.13
H3K27ac_CKO_HDAC1/2_rep2	80228714	66931002	11953326	1344386	83.43
H3K27ac_CKO_luc_rep2	67321746	56272224	10001492	1048030	83.59
input_H3K27me3_rescue	69323372	48044998	18527002	2751372	69.31
input_H3K27ac_rescue	60879948	41745228	16761266	2373454	68.57
EED ChIP_rep1	101412652	66695426	30596580	4120646	65.77
EED ChIP_rep2	60814150	41256814	17109378	2447958	67.84
input_EED ChIP	80301464	50472362	26570232	3258870	62.85
RNA_CKO_rep1	65640514	45913278	16545210	3182026	69.95
RNA_CKO_rep2	58776938	39658304	16379788	2738846	67.47
RNA_WT_rep1	83501366	57235766	22190536	4075064	68.54
RNA_WT_rep2	77391520	53460166	19962284	3969070	69.08
CKO_luc_P25_rep1	77816444	65942710	5401704	6472030	84.74
CKO_luc_P25_rep2	106411672	88053802	8719320	9638550	82.75
CKO_EED_P25_rep1	95243558	78964412	7116278	9162868	82.91
CKO_EED_P25_rep2	102797266	84705730	8975166	9116370	82.4
Het_rep1	82800580	67080168	7156742	8563670	81.01
Het_rep2	94245856	76042518	8824930	9378408	80.69
CKO_HDAC_rep1	98367938	81991148	7889556	8487234	83.35
CKO_HDAC_rep2	86674288	72359210	6377462	7937616	83.48
